# Supplementary material for: The evolution of brilliant iridescence in birds
Source: Research Square preprint supplement (doi:10.21203/rs.3.rs-8020267/v1), 2025-11-06
Supplement: Supplementary file 1 [file 50d1363b8f91833c73581951.xlsx]

## Sheet: Sheet1
ER
	non-melanised (0)	melanised (1)	weak (2)	moderate (3)	strong (4)	brilliant (5)
non-melanised (0)	0	1	1	1	1	1
melanised (1)	1	0	1	1	1	1
weak (2)	1	1	0	1	1	1
moderate (3)	1	1	1	0	1	1
strong (4)	1	1	1	1	0	1
brilliant (5)	1	1	1	1	1	0
SYM
	non-melanised (0)	melanised (1)	weak (2)	moderate (3)	strong (4)	brilliant (5)
non-melanised (0)	0	1	2	3	4	5
melanised (1)	1	0	6	7	8	9
weak (2)	2	6	0	10	11	12
moderate (3)	3	7	10	0	13	14
strong (4)	4	8	11	13	0	15
brilliant (5)	5	9	12	14	15	0
ARD
	non-melanised (0)	melanised (1)	weak (2)	moderate (3)	strong (4)	brilliant (5)
non-melanised (0)	0	1	3	5	9	13
melanised (1)	2	0	6	10	14	19
weak (2)	4	7	0	15	20	23
moderate (3)	8	11	16	0	24	27
strong (4)	12	17	21	25	0	29
brilliant (5)	18	22	26	28	30	0
Ordered 1
	non-melanised (0)	melanised (1)	weak (2)	moderate (3)	strong (4)	brilliant (5)
non-melanised (0)	0	2	3	0	0	0
melanised (1)	1	0	6	0	0	0
weak (2)	4	5	0	8	0	0
moderate (3)	13	14	7	0	10	0
strong (4)	15	16	17	9	0	12
brilliant (5)	18	19	20	21	11	0
Ordered 2
	non-melanised (0)	melanised (1)	weak (2)	moderate (3)	strong (4)	brilliant (5)
non-melanised (0)	0	2	3	20	23	0
melanised (1)	1	0	6	21	24	0
weak (2)	4	5	0	8	22	0
moderate (3)	13	14	7	0	10	0
strong (4)	15	16	17	9	0	12
brilliant (5)	18	19	20	21	11	0
