# Supplementary material for: The evolution of brilliant iridescence in birds
Source: Research Square preprint supplement (doi:10.21203/rs.3.rs-8020267/v1), 2025-11-06
Supplement: Supplementary file 2 [file 5eadfab046795b8703966cf4.xlsx]

## Sheet: Supplementary table 2 - Model (
	log(L)	d,f,	AIC	weight		log(L)	d,f,	AIC	weight		log(L)	d,f,	AIC	weight		log(L)	d,f,	AIC	weight
Max	-2993.61	30	6047.21	6,92168115702492e-05	FitARD	-2326.37	30	4712.74	0.220341	FitARD	-3946.33	30	7952.66	1,22674618872084e-11	FitARD	-3977.73	30	8015.46	0.999994	FitARD
	-3024.89	21	6091.77	1,46006960603366e-14	Ordered1	-2341.05	21	4724.1	0.000753249	Ordered1	-3944.57	21	7931.14	5,77207845476503e-07	Ordered1	-4030.41	21	8102.82	1,06697043424418e-19	Ordered1
	-2990.03	24	6028.06	0.999931	Ordered2	-2331.11	24	4710.21	0.778906	Ordered2	-3927.2	24	7902.41	0.999999	Ordered2	-3995.8	24	8039.6	5,72367743903135e-06	Ordered2
	-7567.86	1	15137.7	0	ER	-6429.61	1	12861.2	0	ER	-10219.5	1	20441	0	ER	-10224.8	1	20451.6	0	ER
	-7566.87	15	15163.7	0	SYM	-6428.29	15	12886.6	0	SYM	-10219.5	15	20469	0	SYM	-10223	15	20476	0	SYM
Crown	-4009.02	30	8078.05	2,34675844898569e-87	FitARD	-2811.84	30	5683.69	6,26329930100585e-10	FitARD	-5045.68	30	10151.4	9,35515960766591e-28	FitARD	-4732.19	30	9524.38	3,51133235203847e-07	FitARD
	-4187.44	21	8416.88	6,21480084881369e-161	Ordered1	-2799.66	21	5641.32	0.99472	Ordered1	-5429.75	21	10901.5	1,19538260870949e-190	Ordered1	-5123.2	21	10288.4	4,37875328026655e-173	Ordered1
	-3815.55	24	7679.1	1	Ordered2	-2801.9	24	5651.79	0.00527963	Ordered2	-4989.44	24	10026.9	1	Ordered2	-4723.33	24	9494.66	1	Ordered2
	-4569.22	1	9140.44	4,72603434185903e-318	ER	-3363.5	1	6729	6,47661805411335e-237	ER	-5968.11	1	11938.2	0	ER	-5655.99	1	11314	0	ER
	-7565.96	15	15161.9	0	SYM	-6424.75	15	12879.5	0	SYM	-10218.1	15	20466.3	0	SYM	-5122.4	15	10274.8	3,91907697654841e-170	SYM
Mantle	-3728.73	30	7517.47	1,49267993657689e-14	FitARD	-2785.6	30	5631.19	2,94029144687426e-16	FitARD	-4787.86	30	9635.72	0.201669	FitARD	-4835.1	30	9730.2	4,8842767506876e-104	FitARD
	-4131.74	21	8305.48	1,14889617484469e-185	Ordered1	-2758.83	21	5559.67	0.999996	Ordered1	-5488.98	21	11020	5,26280449852815e-302	Ordered1	-4908.9	21	9859.8	3,52855497318019e-132	Ordered1
	-3702.9	24	7453.8	1	Ordered2	-2768.37	24	5584.75	3,58469602071348e-06	Ordered2	-4792.48	24	9632.97	0.798331	Ordered2	-4603.22	24	9254.44	1	Ordered2
	-4328.98	1	8659.97	1,21306079820749e-262	ER	-3284.94	1	6571.89	1,58027904286689e-220	ER	-5698	1	11398	0	ER	-5430.81	1	10863.6	0	ER
	-7562.64	15	15155.3	0	SYM	-6424.18	15	12878.4	0	SYM	-10218.6	15	20467.2	0	SYM	-10221.4	15	20472.9	0	SYM
Rump	-3582.86	30	7225.72	1,05037004109953e-14	FitARD	-2811.88	30	5683.76	4,38454840850811e-58	FitARD	-4763.04	30	9586.09	2,40821110013514e-71	FitARD	-4562	30	9184.01	2,57447573796675e-75	FitARD
	-4036.2	21	8114.4	1,11480282882646e-207	Ordered1	-2688.81	21	5419.62	0.999669	Ordered1	-5405.83	21	10853.7	0	Ordered1	-4441.01	21	8924.02	7,35847542548693e-19	Ordered1
	-3556.67	24	7161.35	1	Ordered2	-2693.82	24	5435.64	0.00033104	Ordered2	-4606.44	24	9260.88	1	Ordered2	-4396.26	24	8840.51	1	Ordered2
	-4271.66	1	8545.31	2,99327571376618e-301	ER	-3277.94	1	6557.89	6,72742928583516e-248	ER	-5492.27	1	10986.5	0	ER	-5267.56	1	10537.1	0	ER
	-7562.5	15	15155	0	SYM	-6423.31	15	12876.6	0	SYM	-10215.1	15	20460.2	0	SYM	-10215.9	15	20461.9	0	SYM
Tail	-3040.64	30	6141.29	7,56044277968098e-18	FitARD	-2287.16	30	4634.32	1,60577902974484e-17	FitARD	-3937.72	30	7935.44	5,86981046913598e-28	FitARD	-3770.13	30	7600.25	7,7314348416888e-18	FitARD
	-3042.27	21	6126.54	1,20640516239943e-14	Ordered1	-2257.49	21	4556.98	1	Ordered1	-3932.52	21	7907.04	8,61501422008316e-22	Ordered1	-3756.96	21	7555.93	3,26766315053867e-08	Ordered1
	-3007.22	24	6062.44	1	Ordered2	-2278.94	24	4605.88	2,40536668379172e-11	Ordered2	-3881.02	24	7810.04	1	Ordered2	-3736.73	24	7521.45	1	Ordered2
	-3572.06	1	7146.12	4,81712313390385e-236	ER	-2663.93	1	5329.86	1,48272773537282e-168	ER	-4665.07	1	9332.15	0	ER	-4419.25	1	8840.49	3,74795338640829e-287	ER
	-7564.66	15	15159.3	0	SYM	-6429.37	15	12888.7	0	SYM	-10216.3	15	20462.5	0	SYM	-10221.6	15	20473.1	0	SYM
wings	-2859.11	30	5778.22	2,13083623638522e-05	FitARD	-2126.75	30	4313.51	7,52902785446884e-11	FitARD	-3668.04	30	7396.08	0.0398121	FitARD	-3522.71	30	7105.43	5,2991018323561e-35	FitARD
	-2882.26	21	5806.52	1,52145002792402e-11	Ordered1	-2136.5	21	4315	3,57399102476533e-11	Ordered1	-3692.54	21	7427.09	7,34397591584741e-09	Ordered1	-3485.4	21	7012.8	6,87562768962875e-15	Ordered1
	-2854.35	24	5756.7	0.999979	Ordered2	-2109.44	24	4266.89	1	Ordered2	-3670.86	24	7389.71	0.960188	Ordered2	-3449.79	24	6947.58	1	Ordered2
	-3371.18	1	6744.36	3,41682257941052e-215	ER	-2514.43	1	5030.85	1,27948642986413e-166	ER	-4387.37	1	8776.75	6,18460716385764e-302	ER	-4120.92	1	8243.84	3,3128834789438e-282	ER
	-7565.34	15	15160.7	0	SYM	-6425.09	15	12880.2	0	SYM	-10211.7	15	20453.4	0	SYM	-10210.9	15	20451.8	0	SYM
Throat	-4294.24	30	8648.48	8,20816858628842e-116	FitARD	-3294.46	30	6648.91	3,84002612618649e-28	FitARD	-5547.55	30	11155.1	8,38198321462273e-100	FitARD	-5405.01	30	10870	5,97777329133745e-68	FitARD
	-4041.63	21	8125.26	0.0339823	Ordered1	-3240.33	21	6522.66	0.998906	Ordered1	-5328.42	21	10698.8	1	Ordered1	-5259.22	21	10560.4	1	Ordered1
	-4035.28	24	8118.56	0.966018	Ordered2	-3244.15	24	6536.29	0.00109418	Ordered2	-5340.38	24	10728.8	3,16279106229039e-07	Ordered2	-5296.73	24	10641.5	2,56601504374951e-18	Ordered2
	-5186.23	1	10374.5	0	ER	-4409.12	1	8820.24	0	ER	-6893.4	1	13788.8	0	ER	-7079.34	1	14160.7	0	ER
	-7565.51	15	15161	0	SYM	-6425.26	15	12880.5	0	SYM	-10218.3	15	20466.6	0	SYM	-10218.5	15	20467.1	0	SYM
Breast	-4123.04	30	8306.08	4,36008251233578e-34	FitARD	-3245.01	30	6550.02	4,41797573877249e-57	FitARD	-5490.75	30	11041.5	2,74633597531723e-81	FitARD	-5217.77	30	10495.5	1,32486150839104e-34	FitARD
	-4055.22	21	8152.45	1	Ordered1	-3124.25	21	6290.49	1	Ordered1	-5314.25	21	10670.5	1	Ordered1	-5148.76	21	10339.5	1	Ordered1
	-4079.66	24	8207.31	1,22074060296959e-12	Ordered2	-3145.01	24	6338.02	4,79304207120792e-11	Ordered2	-5372.22	24	10792.4	3,31677300684517e-27	Ordered2	-5259.61	24	10567.2	3,62062350855368e-50	Ordered2
	-5072.51	1	10147	0	ER	-4022.9	1	8047.81	0	ER	-6657.26	1	13316.5	0	ER	-6539.23	1	13080.5	0	ER
	-7562.88	15	15155.8	0	SYM	-6422	15	12874	0	SYM	-10214.9	15	20459.7	0	SYM	-10214.5	15	20459	0	SYM
Belly	-3759.03	30	7578.05	0.00444601	FitARD	-3012.08	30	6084.15	9,26890202400168e-42	FitARD	-5168.9	30	10397.8	1,54776257405754e-109	FitARD	-4883.82	30	9827.64	6,51735167838376e-50	FitARD
	-3762.61	21	7567.23	0.995554	Ordered1	-2926.59	21	5895.19	1	Ordered1	-4927.35	21	9896.71	1	Ordered1	-4779.57	21	9601.13	1	Ordered1
	-3882.61	24	7813.22	3,809635000151e-54	Ordered2	-2958.36	24	5964.73	7,93662360135488e-16	Ordered2	-5080.17	24	10208.3	2,12873821003486e-68	Ordered2	-4855.08	24	9758.17	7,93251677791756e-35	Ordered2
	-4822.2	1	9646.4	0	ER	-3843.7	1	7689.4	0	ER	-6289.26	1	12580.5	0	ER	-6135.95	1	12273.9	0	ER
	-7563.8	15	15157.6	0	SYM	-6423.29	15	12876.6	0	SYM	-10213.5	15	20457	0	SYM	-10212.5	15	20455.1	0	SYM
