# Supplementary material for: The evolution of brilliant iridescence in birds
Source: Research Square preprint supplement (doi:10.21203/rs.3.rs-8020267/v1), 2025-11-06
Supplement: Supplementary file 4 [file ecf21153c35998fcea01c07b.xlsx]

## Sheet: Sheet1
species	abbreviation	Family	score Auber/Durrer	MCZ specimen number	MCZ specimen number	MCZ specimen number	patch measured	Person scored	score me	strict match	curated match (e.g. checking the existence of sexual dichromatism, subspecies, morphs and errors)	notes
Tachybaptus dominicus	TacDom	Podicipedidae	weak	70010	300019	245780	crown, mantle	Auber	weak	1	1
Cathartes burrovianus	CatBur	Cathartidae	weak	143113	264688			Auber	weak	1	1
Megapodius freycinet	MegFre	Megapodiidae	weak	12195				Durrer	weak	1	1	*possibly different subspecies
Melanoperdix nigra	MelNig	Phasianidae	weak	39800				Durrer	weak	1	1
Caloperdix oculea	CalOcu	Phasianidae	weak	not iridescent!				Durrer	glossy	0	1	*verified using multiple specimens
Rollulus roulroul	RolRou	Phasianidae	weak	39798	36433	69850		Durrer	strong	0	1	*male vs female
Francolinus francolinus	FraFra	Phasianidae	weak	36611	25225			Durrer	weak	1	1
Tragopan melanocephalus	TraMel	Phasianidae	weak	not iridescent!				Durrer	glossy	0	0	*uncertain why the discrepancy.
Acryllium vulturinum	AcrVul	Numididae	weak	not iridescent!				Durrer	brown	0	1	*verified using multiple specimens
Buphagus erythrorhynchus	BupEry	Buphagidae	weak					Durrer	glossy	0	1	*verified using multiple specimens
Streptocitta albicollis	StrAlb	Sturnidae	weak	270292	270291	270290	mantle	Durrer	moderate	0	0
Sarcops calvus	SarCal	Sturnidae	weak	194613	194610	194611	wings	Durrer	weak	1	1
Scissirostrum dubium	SciDub	Sturnidae	weak	270286	270284	270285	wings	Durrer	weak	1	1
Speculipastor bicolor	SpeBic	Sturnidae	weak	260002	170204	170203	mantle/breast	Durrer	weak	1	1
Grafisia torquata	GraTor	Sturnidae	weak					Durrer	weak	1	1
Onychognathus tenuirostris	OnyTen	Sturnidae	weak	96426	96427	271070	mantle/breast	Durrer	weak to moderate	0	1	*differences between sexes
Onychognathus salvadorii	OnySal	Sturnidae	weak	232041	171505		mantle/breast	Durrer	moderate	0	0	*uncertain why the discrepancy.
Gracula religiosa	GraRel	Sturnidae	weak	158926				Durrer	strong	0	1	*verified using multiple specimens
Mino dumontii	MinDum	Sturnidae	weak	265515	265516	265517	mantle	Durrer	moderate	0	1	*verified using multiple specimens
Enodes erythrophis	EnoEry	Sturnidae	weak					Durrer	weak	1	1
Oreophasis derbianus	OreDer	Cracidae	weak	72683	72684			Durrer	moderate	0	1	*verified using multiple specimens
Vanellus chilensis	VanChi	Charadriidae	moderate					Auber	moderate	1	1
Phalacrocorax brasilianus	PhaBra	Phalacrocoracidae	moderate	2348060	234737	234782	neck, wings	Auber	moderate	1	1
Nycticorax nycticorax	NycNyc	Ardeidae	moderate	219071	xxxxx			Auber	moderate	1	1
Phasianus versicolor	PhaVer	Phasianidae	moderate	58369	276820		breast	Auber	moderate	1	1
Musophaga rossae	MusRos	Musophagidae	moderate	133434	270701	168638	mantle+wings	Auber	moderate	1	1
Philomachus pugnax	PhiPug	Scolopacidae	moderate	47567	239954		crown/mantle	Auber	glossy	0	1	*iridescenct vs non-iridescent morph
Phoeniculus purpureus	PhoPur	Phoeniculidae	moderate	133549	278715	154961	wings	Auber	moderate	1	1
Capito niger	CapNig	Ramphastidae	moderate	109917				Auber	moderate	1	1
Picoides arcticus	PicArc	Picidae	moderate	253486	181784		mantle/crown	Auber	moderate	1	1
Pycnonotus squamatus	PycSqu	Pycnonotidae	moderate	69711				Auber	moderate	1	1
Lalage leucpygialis	LalLeu	Campephagidae	moderate	270506	269594	2705067	mantle	Auber	moderate	1	1
Terpsiphone mutata	TerMut	Monarchidae	moderate	78124	233130		crown	Auber	moderate	1	1
Parus melanolophus as P. ater	ParAte	Paridae	moderate	149748	149748	286194	crown	Auber	moderate	1	1
Dicaeum aeneum	DicAen	Dicaeidae	moderate	95022	274457	274463	mantle	Auber	moderate	1	1
Coccothraustes	CocCoc	Fringillidae	moderate	could not measure with probe				Auber	weak	0	1	*uncertain which species/taxonomy, benefit of doubt (e.g. Coccothraustes_abeillei is weak)
Hypochera as Vidua chalybeata	HypCha	Viduidae	moderate	154837	133994	171527	mantle/breast	Auber	moderate	1	1
Dicrurus annectans	DicAnn	Dicruridae	moderate	34225	11234	34227	mantle	Auber	moderate	1	1
Columba fasciata	ColFas	Columbidae	moderate	172768	172766	172765	mantle	Durrer	moderate	1	1
Aegithina tiphia	AegTip	Aegithinidae	moderate	262646			crown	Durrer	moderate	1	1
Leucopsar rothschildi	LeuRot	Sturnidae	moderate					Durrer	moderate	1	1
Acridotheres cristatellus	AcrCri	Sturnidae	moderate	51039	51040	51038	crown	Durrer	weak	0	0	*verified using multiple specimens
Ampeliceps coronatus	AmpCor	Sturnidae	moderate	83260			mantle	Durrer	moderate	1	1
Neocichla gutturalis	NeoGut	Sturnidae	moderate	134446				Durrer	weak	0	0	*verified using multiple specimens
Molothrus bonariensis	MolBon	Icteridae	moderate	31046	262219	236743	breast/mantle	Durrer	strong	0	0
Creatophora cinerea	CreCin	Sturnidae	moderate	79009			wing (difficult, not ideal)	Durrer	weak	0	0
Sturnus vulgaris	StuVul	Sturnidae	moderate	23353			mantle/breast	Durrer	moderate	1	1
Basilornis celebensis	BasCel	Sturnidae	moderate	95098	233354		mantle	Durrer	moderate	1	1
Aplonis panayensis	AplPan	Sturnidae	moderate	248506	270295	270294	mantle/belly	Durrer	moderate	1	1
Saroglossa aurata	SarAur	Sturnidae	moderate	156710			wing (not ideal)	Durrer	strong	0	0
Tetrao tetrix	TetTet	Phasianidae	moderate	179971	179970	234500	mantle	Durrer	moderate	1	1
Lophura as Gennaeus leucomelanos	LopLeu	Phasianidae	moderate	288287	288286	288288	mantle	Durrer	moderate	1	1
Houppifer erythrophthalmus as Lophura erythrophthalma	HouEry	Phasianidae	moderate					Durrer	moderate	1	1
Syrmaticus ellioti	SyrEll	Phasianidae	moderate	132658	132569			Durrer	moderate	1	1
Prosthemadera novaeseelandiae	ProNov	Meliphagidae	moderate	40010	75939	75938	mantle	Durrer/Auber	moderate	1	1
Afropavo congensis	AfrCon	Phasianidae	moderate	264412	264413		tail	Durrer	moderate	1	1
Poeoptera lugubris	PoeLug	Sturnidae	moderate	97369	97368		belly/crown/mantle	Durrer	moderate	1	1
Tachycineta albiventer	TacInt	Hirundinidae	moderate	176031	142214	264962	mantle	Durrer	moderate	1	1
Harpactes reinwardtii	HarRei	Trogonidae	moderate	60345	60344	219772	mantle	Durrer	moderate	1	1
Corvus frugilegus	CorFru	Corvidae	moderate	33969	749323	149322	mantle	Durrer	moderate	1	1
Phoeniculus purpureus	PhoGru	Phoeniculidae	strong					Durrer	strong	1	1
Chloroceryle americana	ChlAme	Alcedinidae	strong	141907	231008			Durrer	strong	1	1
Carphibis spinicollis	CarSpi	Threskiornithidae	strong					Durrer	strong	1	1	*Threskiornis
Hemiprocne comata	HemCom	Apodidae	strong	194256	194257		wing/crown	Durrer	strong	1	1
Collocalia esculenta	ColEsc	Apodidae	strong	274275	274277		wing/mantle	Durrer	strong	1	1
Butorides virescences	ButVir	Ardeidae	strong	111884	11188			Durrer/Auber	strong	1	1
Plegadis falcinellus	PleFal	Threskiornithidae	strong	123647	67420		wings	Auber	strong	1	1
Bostrychia hagedash	BosHag	Threskiornithidae	strong	56403	87766	231817	wings	Auber	strong	1	1
Theristicus caerulescens	TheCae	Threskiornithidae	strong	84095				Auber	strong	1	1
Meleagris gallopavo	MelGal	Phasianidae	strong	101450	286411	258222	wings/breast	Auber	strong	1	1
Tauraco livingstonii	TauLiv	Musophagidae	strong	278620	148344	148346	wings	Auber	strong	1	1
Chrysococcyx klaas	ChrKla	Cuculidae	strong	231867	95425	97942	crown, mantle, wing	Auber	strong	1	1
Psophia leucoptera	PsoLeu	Psophiidae	strong	158919			breast	Auber	strong	1	1
Ptilinopus perousii	PtiPer	Columbidae	strong	280151	96976	96977	wing	Auber	strong	1	1
Priotelus temnurus	TroTem	Trogonidae	strong					Auber	strong	1	1
Leptosomus discolor	LepDis	Leptosomidae	strong	78770	78263	78266	wings, mantle	Auber	strong	1	1
Chloroceryle inda	ChlInd	Alcedinidae	strong	141905	109929		wings, mantle	Auber	strong	1	1
Galbula leucogastra	GalLeu	Galbulidae	strong	263856	138125		mantle	Auber	strong	1	1
Nectarinia kilimensis	NecKil	Nectariniidae	strong	264591	271075	97549	mantle	Auber	strong	1	1
Columba livia	ColLiv	Columbidae	strong	166809	235236		throat; breast	Durrer	moderate	0	0
Zenaida asiatica	ZenAsi	Columbidae	strong	not measure, no iridescence patc				Durrer	strong	1	1
Vanellus vanellus	VanVan	Charadriidae	strong	98609	298610	154001	mantle/wing	Durrer	strong	1	1
Tadorna tadorna	TadTad	Anatidae	strong	27764	....			Durrer	strong	1	1
Anas specularis	AnaSpe	Anatidae	strong	85239	291169			Durrer	strong	1	1
Anas gibberifrons	AnaGib	Anatidae	strong	270043	270324	270323	wing	Durrer	strong	1	1
Anas platyrhynchos	AnaPla	Anatidae	strong	36659	52877	52874	neck	Durrer	strong	1	1
Amazonetta brasiliensis	AmaBra	Anatidae	strong	96928	169036	177547	wing	Durrer	brilliant	0	0
Aix sponsa	AixSpo	Anatidae	strong	30248	30430	230244	wing	Durrer	strong	1	1
Aix galericulata	AixGal	Anatidae	strong	88100	277312		wing	Durrer	strong	1	1
Polyplectron bicalcaratum	PolBic	Anatidae	strong	266909	152315	57210	wings	Durrer	strong	1	1
Lophura ignata	LopIgn	Phasianidae	strong					Durrer	strong	1	1
Chrysolophus pictus	ChrPic	Phasianidae	strong	52425			mantle	Durrer	strong	1	1
Phasianus colchicus	PhaCol	Phasianidae	strong	232389	239950	132678	neck	Durrer	strong	1	1
tauraco corythaix	tauCor	Musophagidae	strong					Durrer	strong	1	1
Ducula concinna	DucCon	Columbidae	strong					Durrer	strong	1	1
Phaps chalcoptera	PhaCha	Columbidae	strong	170016			wing	Durrer	brilliant	0	0
Gallus gallus	GalGal	Phasianidae	strong	270086	11195	194026	wing	Durrer	strong	1	1
Meleagris gallopavo	MelGal	Phasianidae	strong	45131	187252		wing	Durrer	strong	1	1
Trogon rufus	TroRuf	Trogonidae	brilliant	263813	173839	142198	crown/mantle	Durrer	brilliant	1	1
Priotelus temnurus	PriTem	Trogonidae	strong	14925	11976	235141	mantle	Durrer	strong	1	1
Apaloderma narina	ApaNar	Trogonidae	strong	237575	237574	133600	mantle	Durrer	brilliant	0	0
Galbula ruficauda	GalRuf	Galbulidae	strong	280144	230942	249717	dorsal	Durrer	brilliant	0	0	*other species strong
Cosmopsarus regius	CosReg	Sturnidae	strong	170518	95100		mantle/crown/breast	Durrer	strong	1	1
Spreo superbus	SprSup	Sturnidae	strong	232873	232876	235034	mantle	Durrer	strong	1	1
Lamprotornis caudatus	LamCau	Sturnidae	strong	153606			mantle	Durrer	brilliant	0	0
Lamprotornis chloropterus	LamChl	Sturnidae	strong	141623	140245		mantle	Durrer	brilliant	0	0
Caloenas nicobarica	CalNic	Columbidae	brilliant	170053	64505	64502	mantle/wing	Durrer	brilliant	1	1
Cinnyricinclus leucogaster	CinLeu	Sturnidae	brilliant	168926	168925		mantle/crown/wing	Durrer	brilliant	1	1
Paradisaea rubra	ParBri	Paradisaeidae	brilliant					Durrer	brilliant	1	1
Chrysococcyx cupreus	ChrCup	Cuculidae	brilliant	133404	97940	87802	crown/mantle	Durrer	brilliant	1	1
Ptiloris mangificus	PtiMan	Paradisaeidae	brilliant					Durrer	brilliant	1	1
Astrapia rothschildi	AstRot	Paradisaeidae	brilliant					Durrer	brilliant	1	1
Parotia sefilata	ParSef	Paradisaeidae	brilliant	36248				Durrer	brilliant	1	1
Diphyllodes magnificus	DipMag	Paradisaeidae	brilliant	168246				Durrer	brilliant	1	1
Pavo muticus	PavMut	Paradisaeidae	brilliant	99029				Durrer/Auber	brilliant	1	1
Nectarinia sperata	NecSpe	Nectariniidae	brilliant	277817	279170	194715	crown	Durrer	brilliant	1	1
Nectarinia cuprea	NecCup	Nectariniidae	brilliant	151639	134310	91601	mantle	Durrer	strong	0	0
Agriocharis ocellata	AgrOce	Phasianidae	brilliant	40115				Durrer	brilliant	1	1
Lophophorus impejanus	LopImp	Phasianidae	brilliant					Durrer/Auber	brilliant	1	1
Pharomachrus pavoninus	PhaPav	Trogonidae	brilliant					Durrer	brilliant	1	1
Pharomachrus mocino	PhaMoc	Trogonidae	brilliant					Durrer	brilliant	1	1
Coccycolius/lamprotornis iris	CocIri	Sturnidae	brilliant	279319	279320		breast/mantle	Durrer	strong	0	0
Amazilia cyanura	AmaCya	Trochilidae	brilliant	158123	145821	145820	belly	Durrer	brilliant	1	1
				105	80	51	79		123	96	106
									degree of repeatability	0.780488	0.861789
