# Supplementary material for: The evolution of brilliant iridescence in birds
Source: Research Square preprint supplement (doi:10.21203/rs.3.rs-8020267/v1), 2025-11-06
Supplement: Supplementary file 5 [file f7d49fb6704a5e1a2b6d1483.xlsx]

## Sheet: Sheet1
Male	Pr(non-melanized)	Pr(non- iridescent melanized)	Pr(weak iridescent)	Pr(moderate iridescent)	Pr(strong iridescent)	Pr(Brilliant)	Pr(at least Strong)	Female	Pr(non-melanized)	Pr(non- iridescent melanized)	Pr(weak iridescent)	Pr(moderate iridescent)	Pr(strong iridescent)	Pr(brilliant iridescent)	Pr(at least Strong)	Male_ext	Pr(non-melanized)	Pr(non- iridescent melanized)	Pr(weak iridescent)	Pr(moderate iridescent)	Pr(strong iridescent)	Pr(brilliant iridescent)	Pr(at least Strong)	Pr(at least Strong)	Pr(non-melanized)	Pr(non- iridescent melanized)	Pr(weak iridescent)	Pr(moderate iridescent)	Pr(strong iridescent)	Pr(brilliant iridescent)	Pr(at least Strong)
Max	0.0259595	0.0216819	0.0699155	0.151511	0.413161	0.317771	0.730932		0.0977813	0.0934097	0.148522	0.192824	0.250307	0.217156	0.467463		0.00401139	0.00487885	0.025245	0.0951829	0.523914	0.346768	0.870682		0.00844328	0.0080151	0.0278849	0.055548	0.303224	0.596885	0.900109
crown	0.000540921	0.000388478	0.00164782	0.00462897	0.106032	0.886762	0.992794		0.08117	0.0794173	0.118518	0.146696	0.325033	0.249166	0.574199		0.0408843	0.0333323	0.0660523	0.0672212	0.163891	0.628618	0.79251		0.00664257	0.006285	0.0188598	0.0323802	0.264708	0.671124	0.935832
mantle	0.169242	0.158322	0.222081	0.262328	0.111613	0.0764139	0.188027		0.0546596	0.0672299	0.140793	0.220363	0.2557	0.261254	0.516954		0.136962	0.128418	0.197764	0.250365	0.168515	0.117975	0.28649		0.0863886	0.0850263	0.153333	0.273201	0.281601	0.12045	0.402051
rump	0.208601	0.206385	0.211318	0.220211	0.0854184	0.068067	0.153485		0.180225	0.186903	0.272064	0.279636	0.0549594	0.0262127	0.0811721		0.181087	0.163831	0.187777	0.240379	0.125547	0.101379	0.226926		0.110375	0.102427	0.159897	0.249346	0.235641	0.142313	0.377954
tail	0.101693	0.115221	0.205214	0.236163	0.196303	0.145406	0.341709		0.00214024	0.0030884	0.0191631	0.0399517	0.340503	0.595154	0.935657		0.0109367	0.0115468	0.0565483	0.0896477	0.380246	0.451075	0.831321		0.00141321	0.00207731	0.0248121	0.0273404	0.29826	0.646097	0.944357
wings	0.00472902	0.00409536	0.0276354	0.0330155	0.301308	0.629216	0.930525		0.00454568	0.00517764	0.0343952	0.0875736	0.294398	0.57391	0.868308		6,38461241286456e-05	1,68111803786086e-05	0.000161419	0.00106382	0.0839576	0.914737	0.998694		0.00274828	0.00288966	0.00740446	0.012313	0.277335	0.69731	0.974645
throat	0.177743	0.181699	0.186664	0.186198	0.162969	0.104726	0.267695		0.16357	0.164459	0.16735	0.16922	0.166884	0.168517	0.3354		0.000144486	0.000146629	0.000597888	0.00188061	0.035779	0.961451	0.99723		0.131511	0.136676	0.157424	0.182373	0.214655	0.17736	0.392016
breast	0.0495313	0.0495048	0.0642003	0.0918173	0.192202	0.552745	0.744946		0.114012	0.115769	0.147205	0.161088	0.241983	0.219944	0.461927		0.000150384	0.000152138	0.0008104	0.00278923	0.0516395	0.944458	0.996098		0.133576	0.135105	0.146716	0.175115	0.229422	0.180066	0.409489
belly	0.163134	0.164035	0.165141	0.166672	0.169129	0.171889	0.341018		0.150575	0.150633	0.16214	0.182222	0.170843	0.183586	0.35443		0.160046	0.160072	0.163435	0.16648	0.165394	0.184573	0.349967		0.162758	0.164776	0.165879	0.167171	0.168958	0.170456	0.339414
Perturbated
	Pr(non-melanized)	Pr(non- iridescent melanized)	Pr(weak iridescent)	Pr(moderate iridescent)	Pr(strong iridescent)	Pr(brilliant iridescent)	Pr(at least Strong)		Pr(non-melanized)	Pr(non- iridescent melanized)	Pr(weak iridescent)	Pr(moderate iridescent)	Pr(strong iridescent)	Pr(brilliant iridescent)	Pr(at least Strong)		Pr(non-melanized)	Pr(non- iridescent melanized)	Pr(weak iridescent)	Pr(moderate iridescent)	Pr(strong iridescent)	Pr(brilliant iridescent)	Pr(at least Strong)		Pr(non-melanized)	Pr(non- iridescent melanized)	Pr(weak iridescent)	Pr(moderate iridescent)	Pr(strong iridescent)	Pr(brilliant iridescent)	Pr(at least Strong)
Max	0.0131782	0.013404	0.0678786	0.186636	0.549205	0.169698	0.718903		0.0354741	0.0407821	0.113013	0.144016	0.308635	0.358079	0.666714		0.00175978	0.00224105	0.0146332	0.0647698	0.466064	0.450532	0.916596		0.0389896	0.0408967	0.0877686	0.122561	0.284833	0.424951	0.709784
crown	0.012269	0.0134828	0.0184712	0.0265638	0.224433	0.70478	0.929213		0.08117	0.0794173	0.118518	0.146696	0.325033	0.249166	0.574199		0.0408843	0.0333323	0.0660523	0.0672212	0.163891	0.628618	0.79251		0.0651645	0.0627578	0.104626	0.11976	0.248838	0.398853	0.647692
mantle	0.162355	0.162686	0.230847	0.240543	0.114784	0.0887843	0.203569		0.0550496	0.0679668	0.143346	0.224516	0.25356	0.255562	0.509122		0.136962	0.128418	0.197764	0.250365	0.168515	0.117975	0.28649		0.151463	0.147753	0.16639	0.215798	0.172923	0.145674	0.318597
rump	0.198094	0.197274	0.222345	0.21946	0.0908309	0.0719966	0.162827		0.11979	0.123289	0.203178	0.26036	0.168372	0.125012	0.293384		0.181087	0.163831	0.187777	0.240379	0.125547	0.101379	0.226926		0.149361	0.134958	0.172969	0.221609	0.169984	0.15112	0.321104
tail	0.0861574	0.0958072	0.217142	0.241908	0.210232	0.148753	0.358985		0.00482015	0.00716176	0.0187195	0.0467513	0.347211	0.575337	0.922547		0.0109367	0.0115468	0.0565483	0.0896477	0.380246	0.451075	0.831321		0.00649818	0.00919875	0.0601803	0.083431	0.335305	0.505386	0.840692
wings	0.00472902	0.00409536	0.0276354	0.0330155	0.301308	0.629216	0.930525		0.00641989	0.00699989	0.0479944	0.120586	0.294812	0.523188	0.818		6,38461241286456e-05	1,68111803786086e-05	0.000161419	0.00106382	0.0839576	0.914737	0.998694		0.00274833	0.00288971	0.00740424	0.0123116	0.277333	0.697313	0.974646
throat	0.0094907	0.00951966	0.0139719	0.0160122	0.140677	0.810329	0.951006		0.1632	0.16323	0.16667	0.1686	0.167249	0.171051	0.3383		0.000144486	0.000146629	0.000597888	0.00188061	0.035779	0.961451	0.99723		0.144721	0.144878	0.163298	0.181149	0.197437	0.168517	0.365953
breast	0.000959319	0.000971693	0.00490669	0.00520586	0.104047	0.883909	0.987956		0.158735	0.15883	0.170693	0.177148	0.171299	0.163295	0.334594		0.000150384	0.000152138	0.0008104	0.00278923	0.0516395	0.944458	0.996098		0.0846789	0.084906	0.124192	0.162644	0.353723	0.189856	0.543579
belly	0.159179	0.159206	0.162086	0.165843	0.166428	0.187257	0.353685		0.150575	0.150633	0.16214	0.182222	0.170843	0.183586	0.35443		0.160046	0.160072	0.163435	0.16648	0.165394	0.184573	0.349967		0.163717	0.163733	0.165614	0.168419	0.170429	0.168088	0.338517
