# Supplementary figures and images for: The evolution of brilliant iridescence in birds
Source: Research Square preprint supplement (doi:10.21203/rs.3.rs-8020267/v1), 2025-11-06

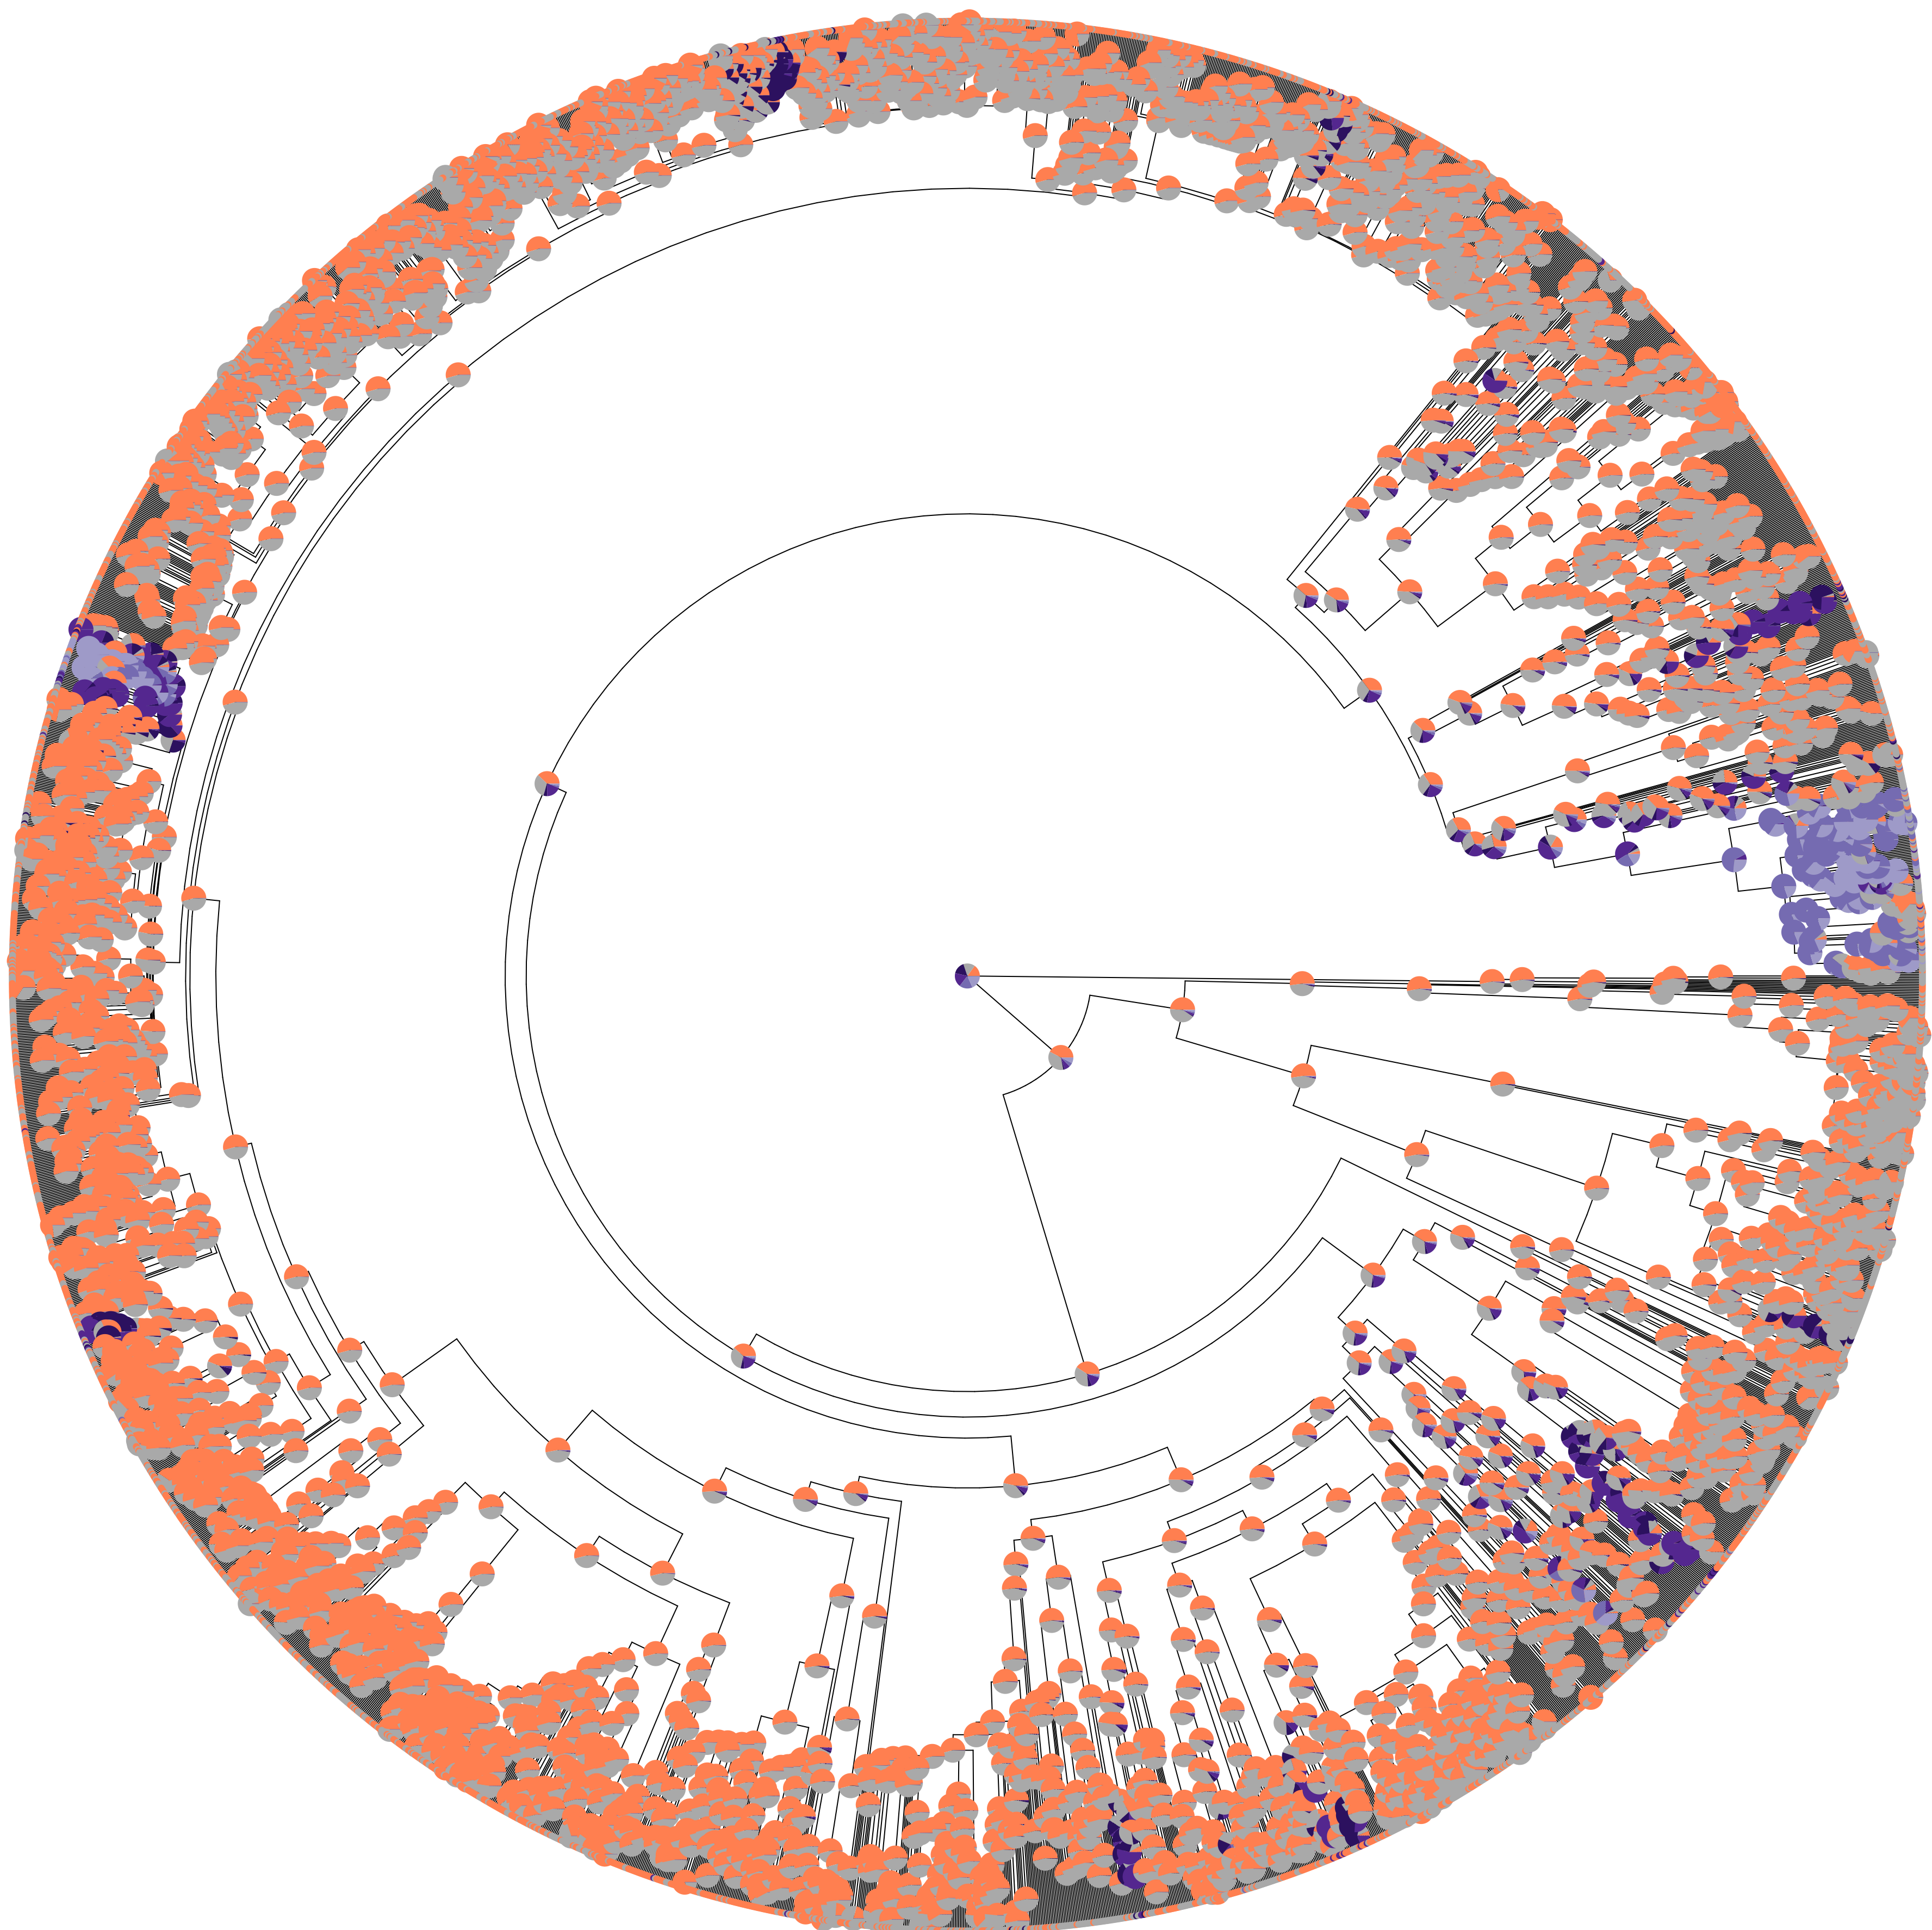

Supplement: Supplementary file 1 [file female_belly.pdf › supp_3/female_belly.pdf]

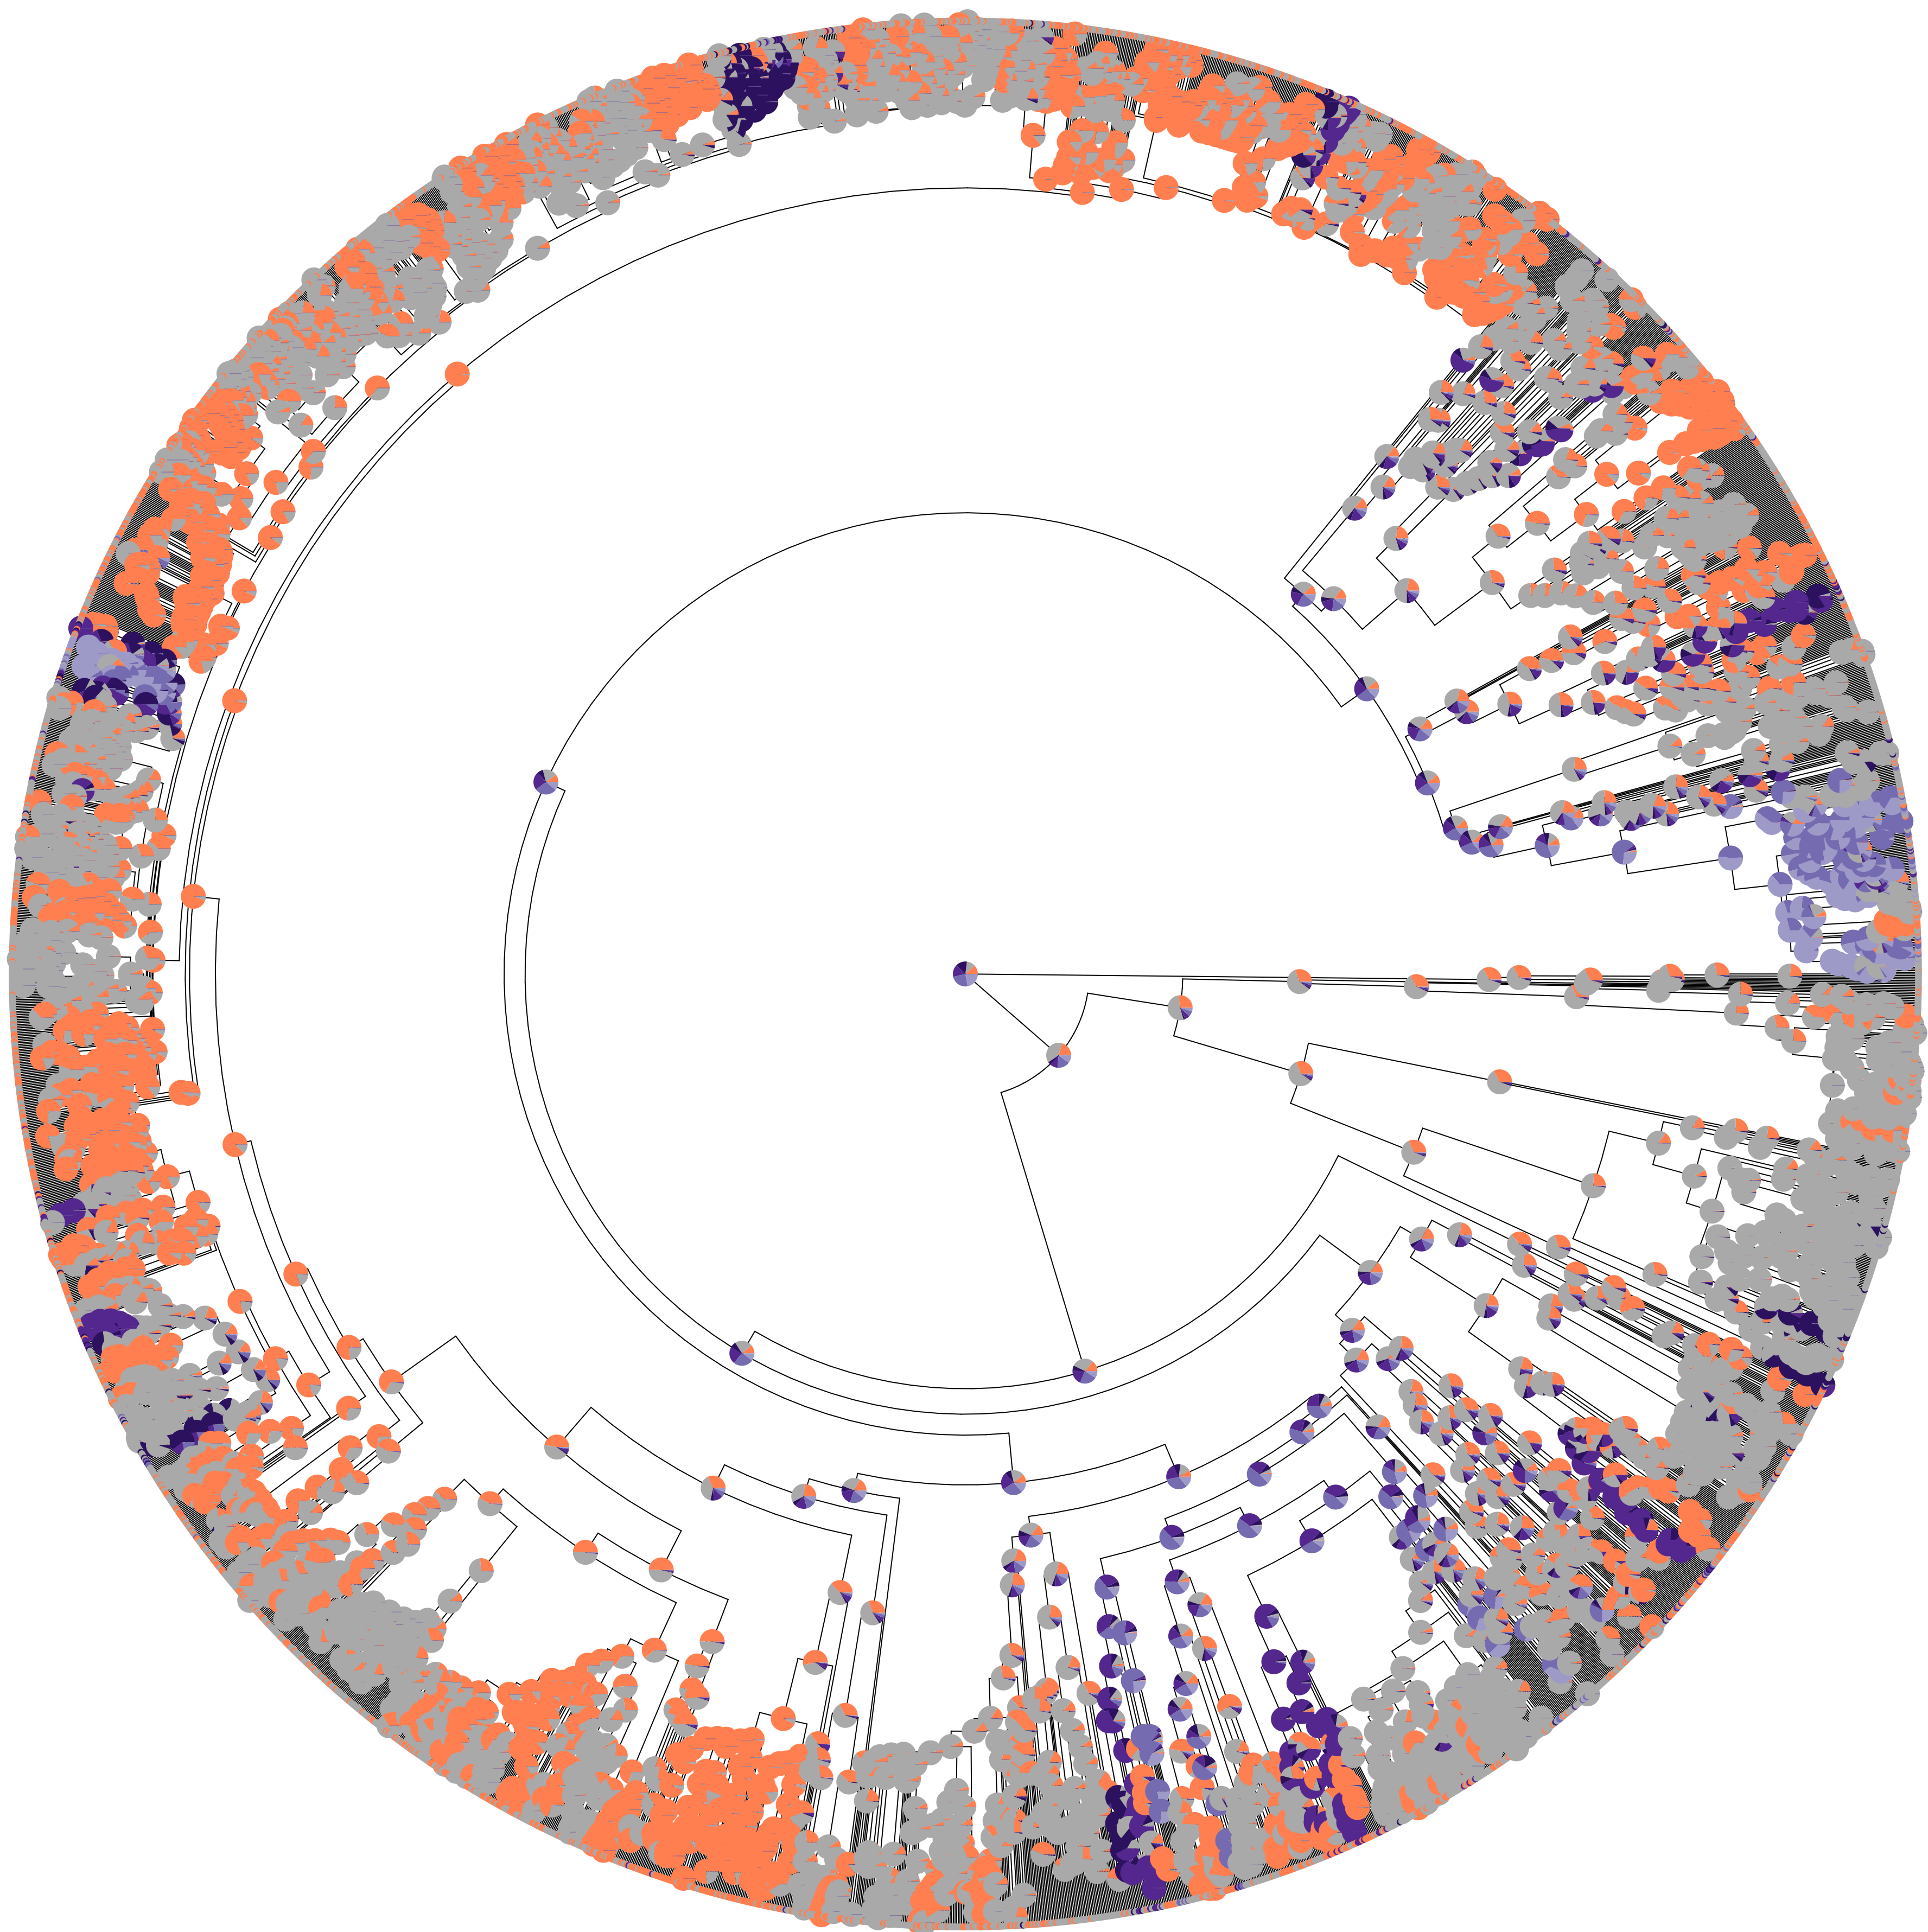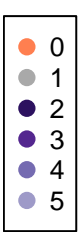

Supplement: Supplementary file 2 [file female_breast.pdf › supp_3/female_breast.pdf]

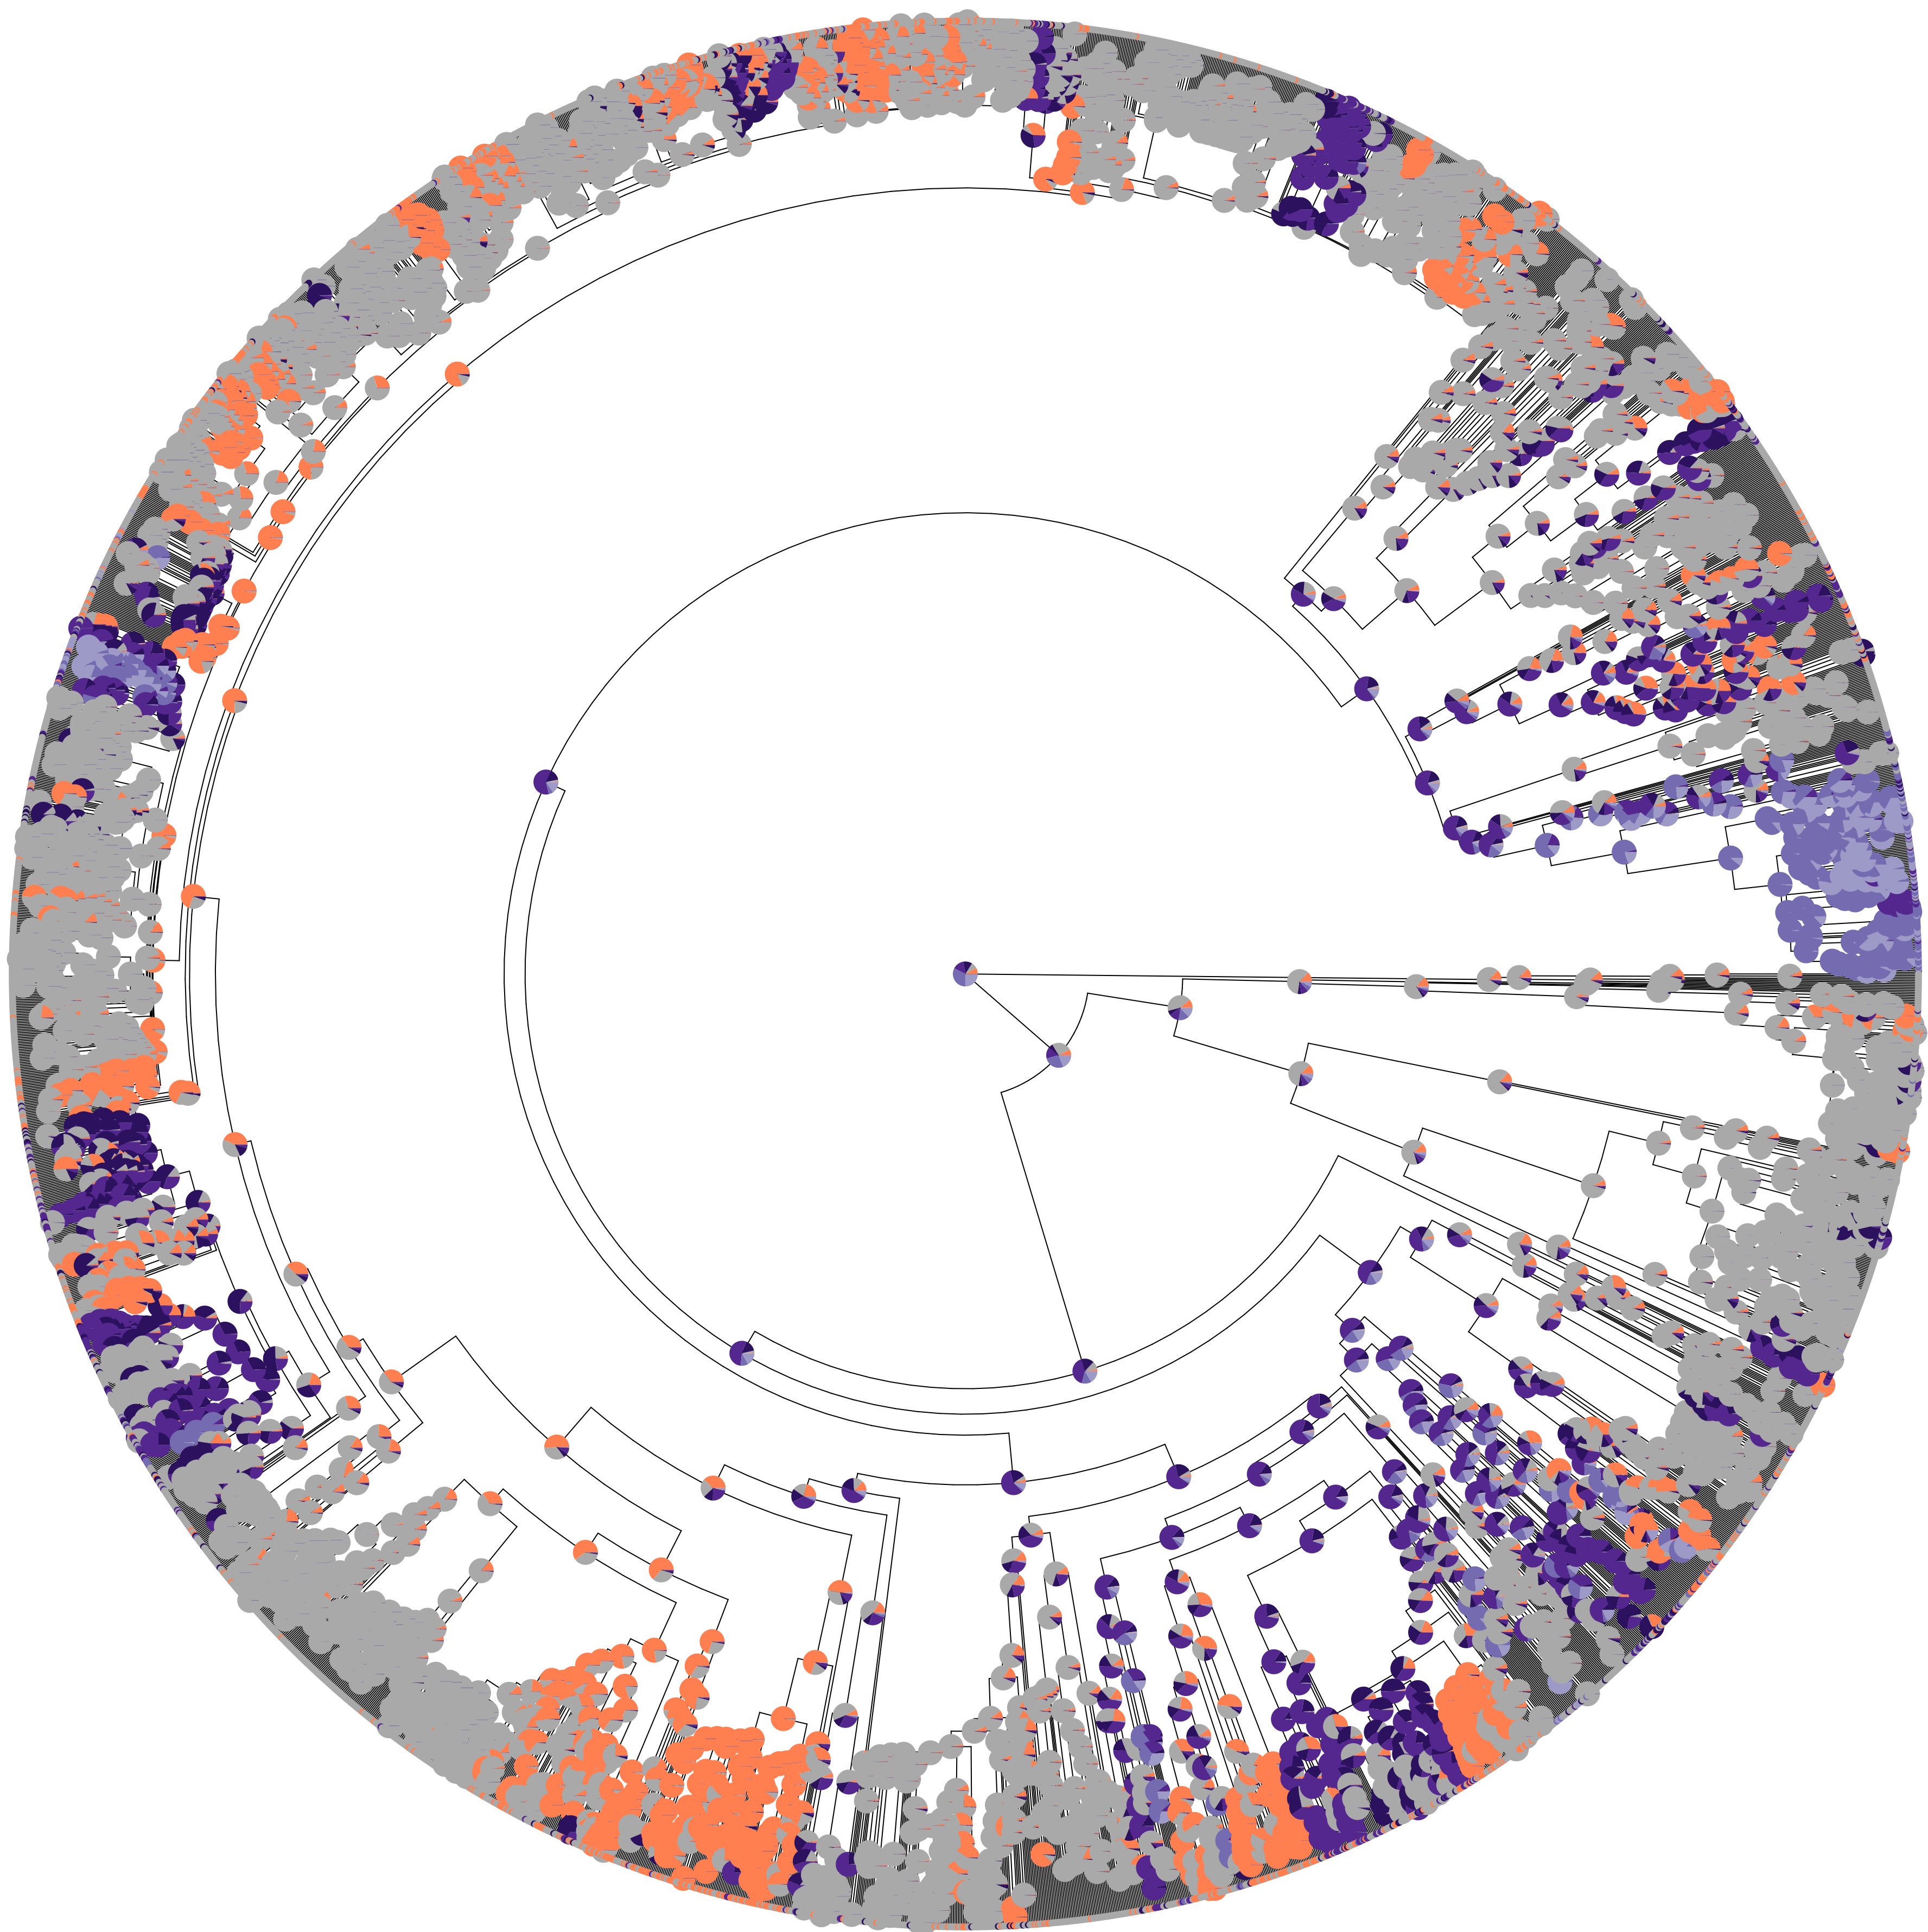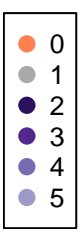

Supplement: Supplementary file 3 [file female_crown.pdf › supp_3/female_crown.pdf]

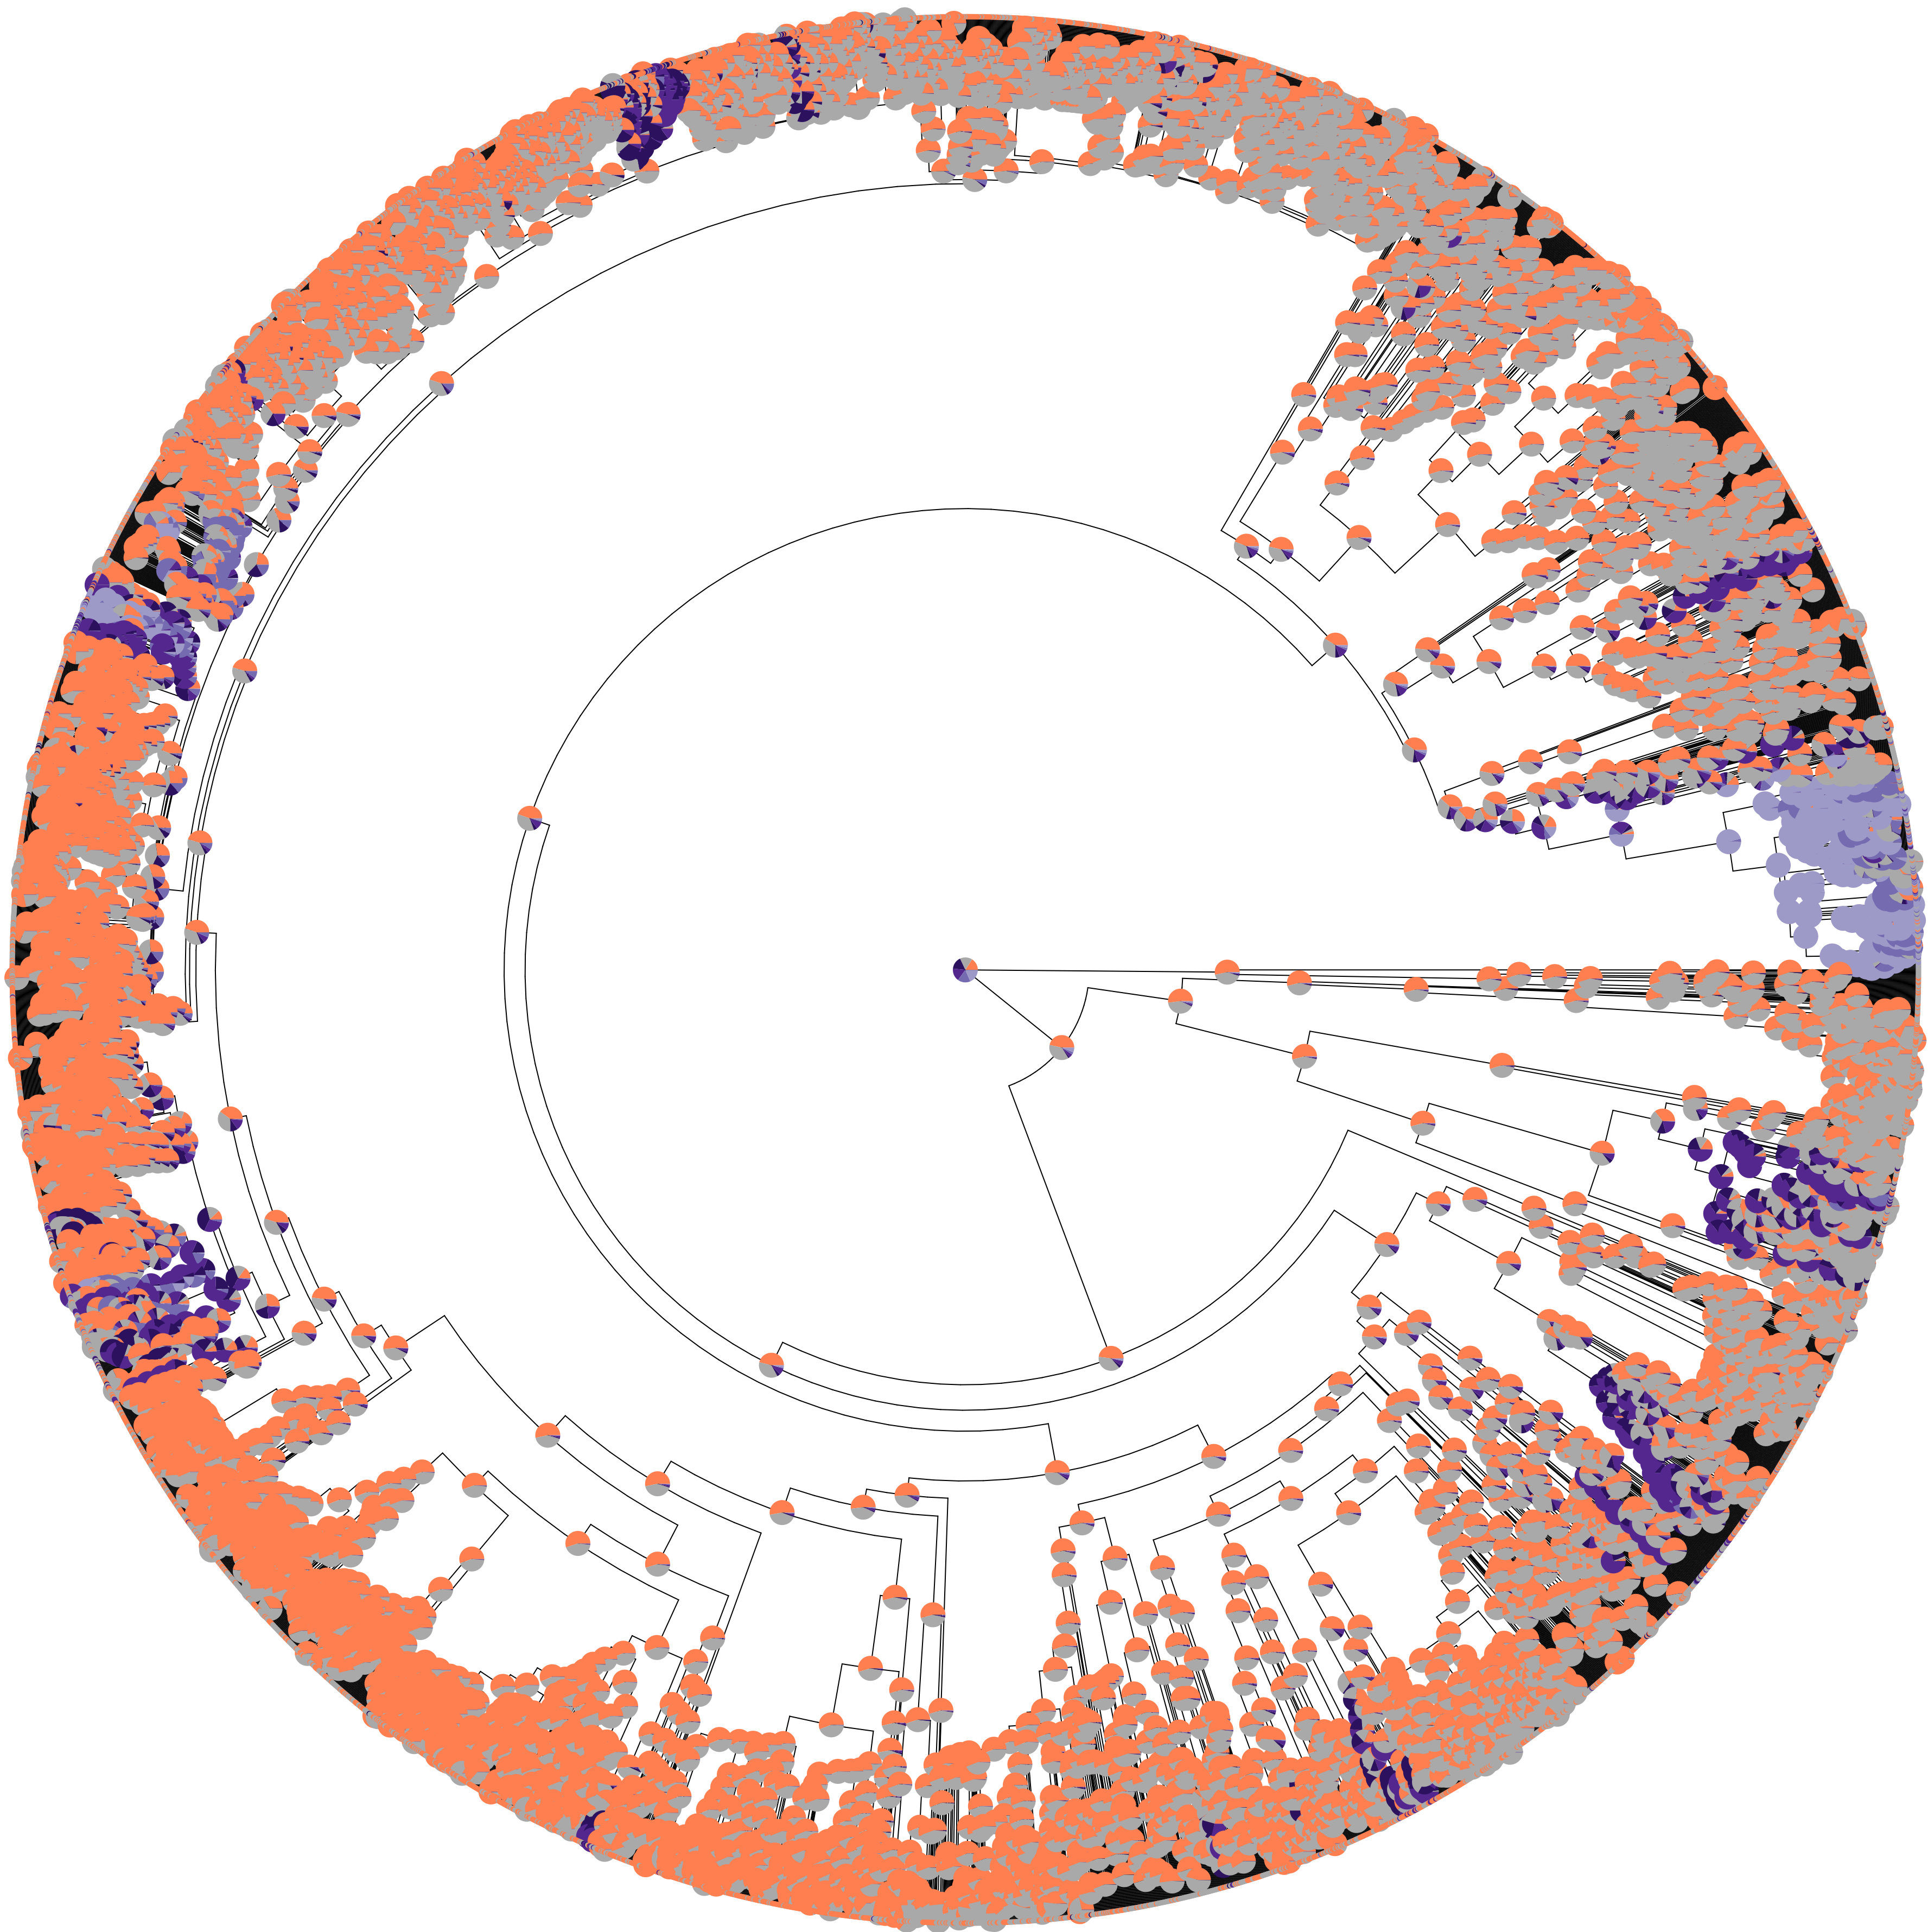

Supplement: Supplementary file 4 [file female_ext_belly.pdf › supp_3/female_ext_belly.pdf]

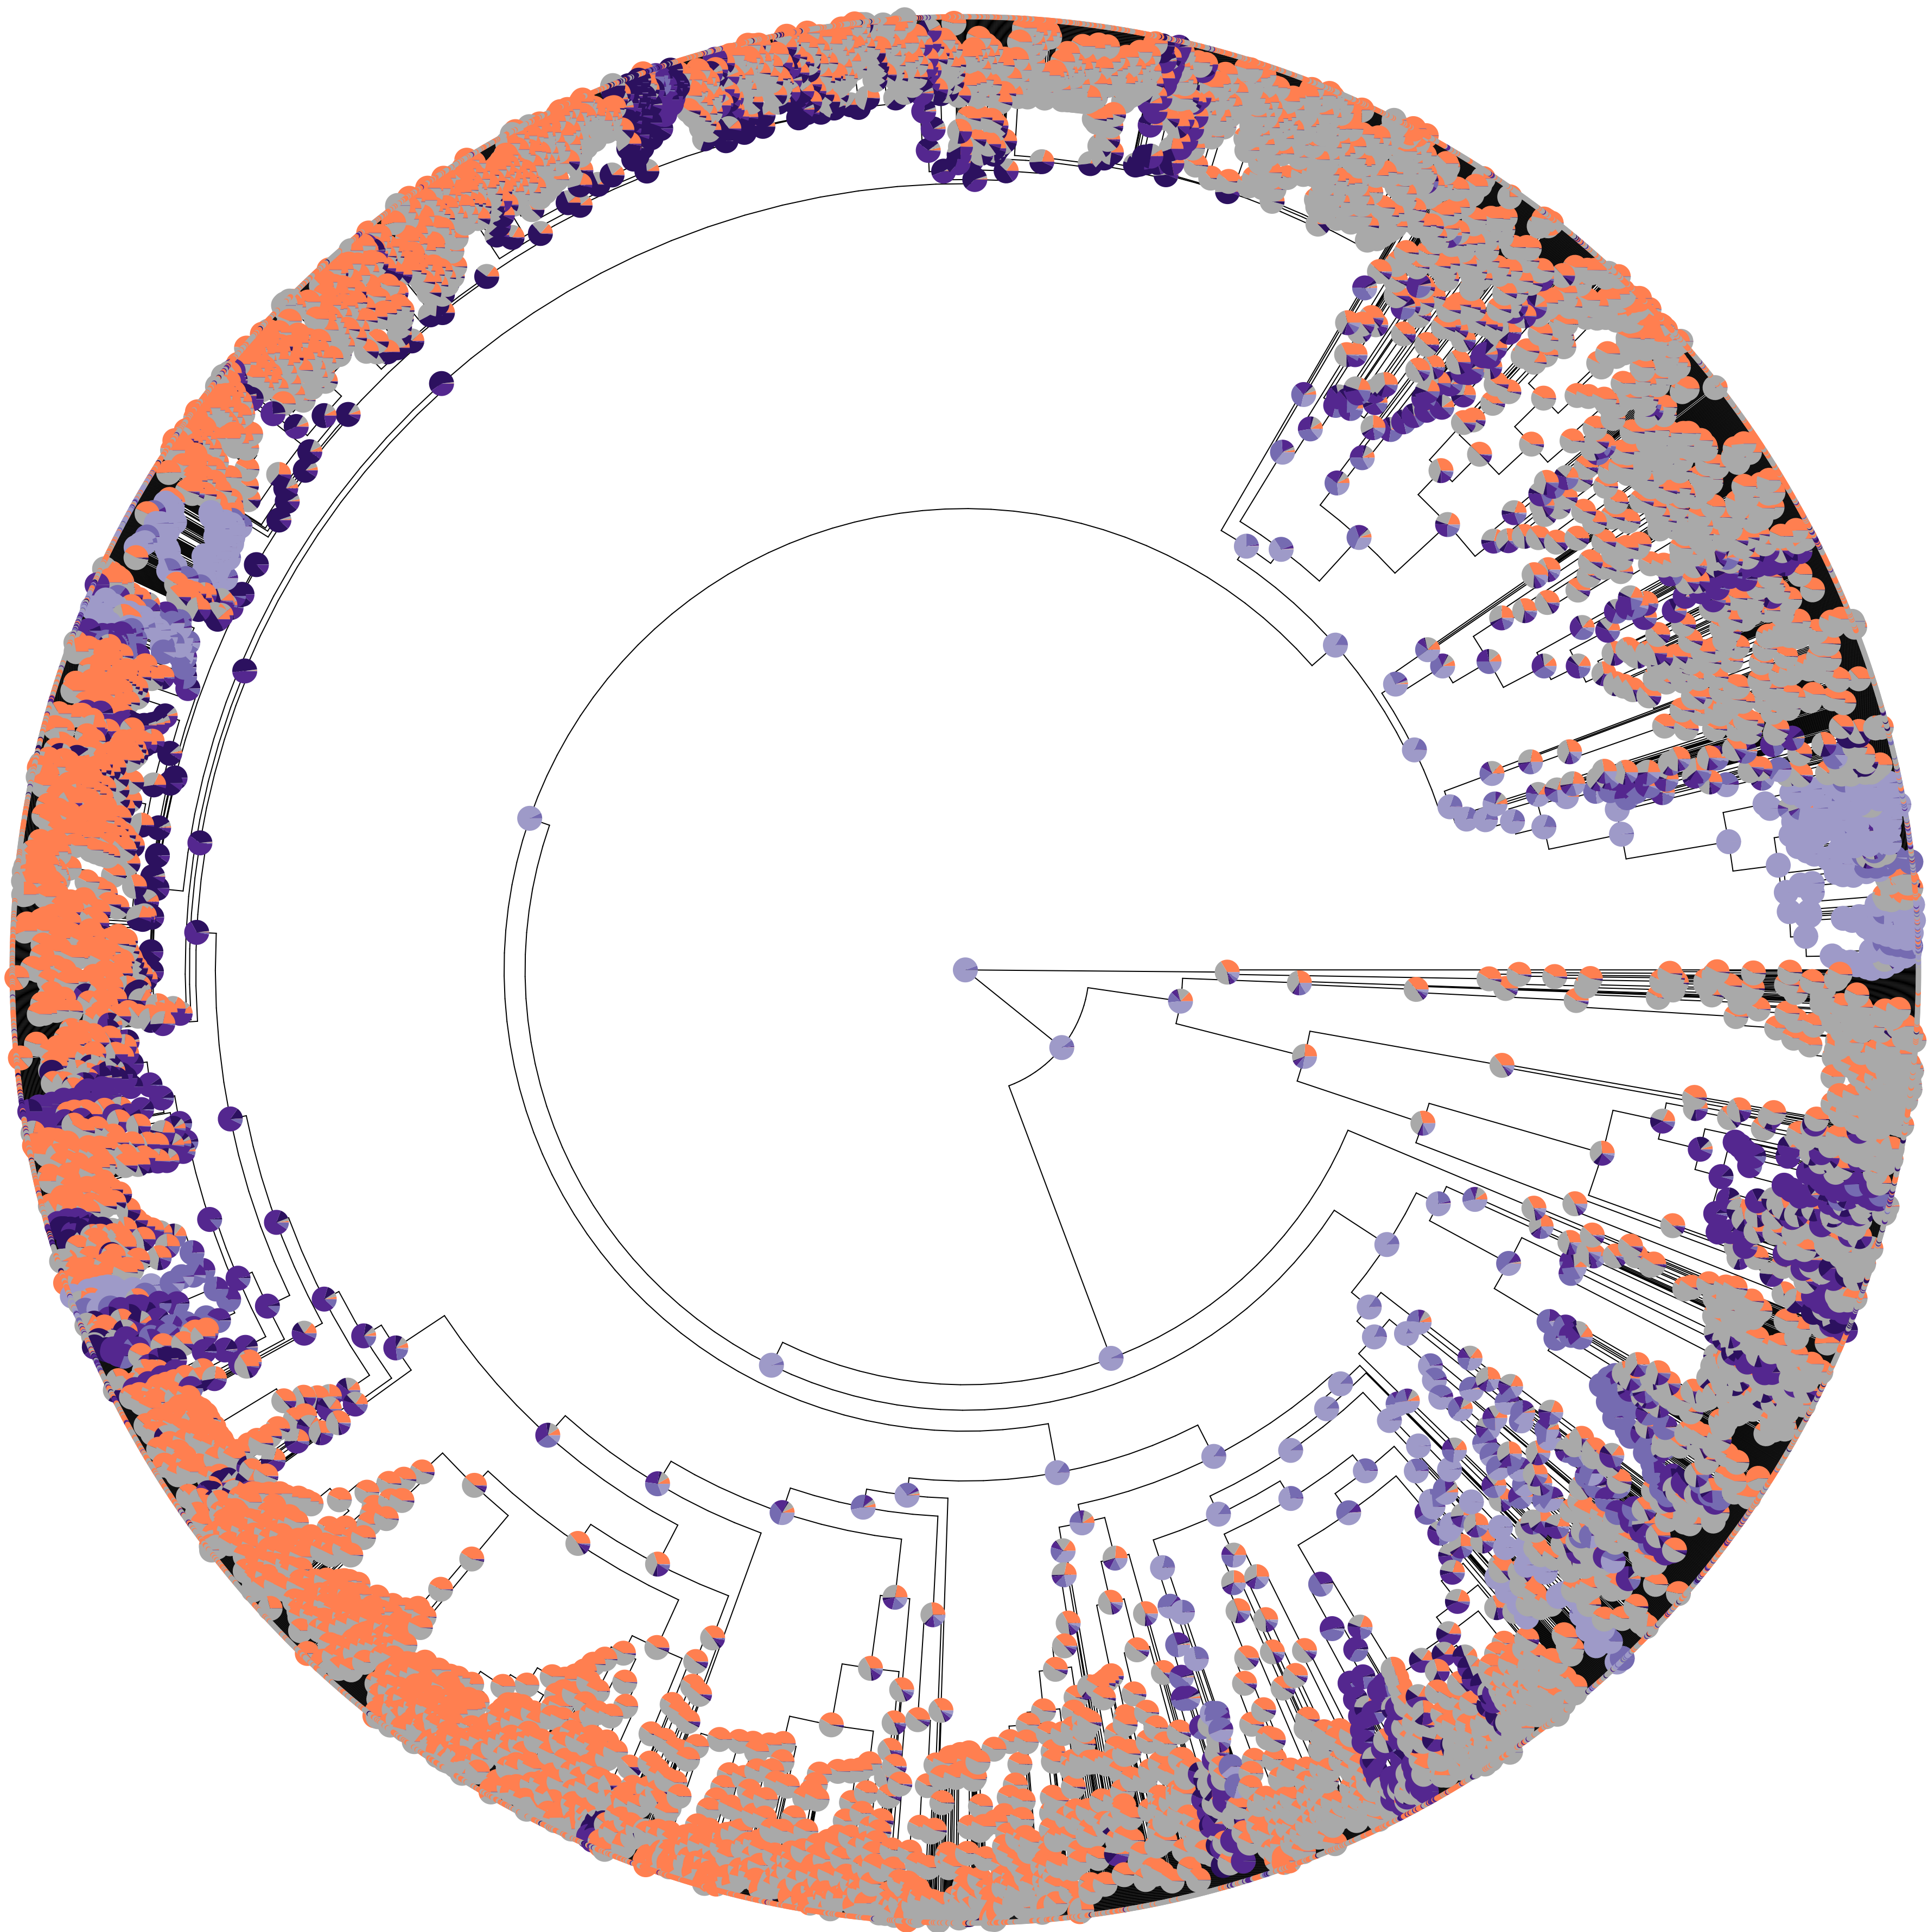

Supplement: Supplementary file 5 [file female_ext_breast.pdf › supp_3/female_ext_breast.pdf]

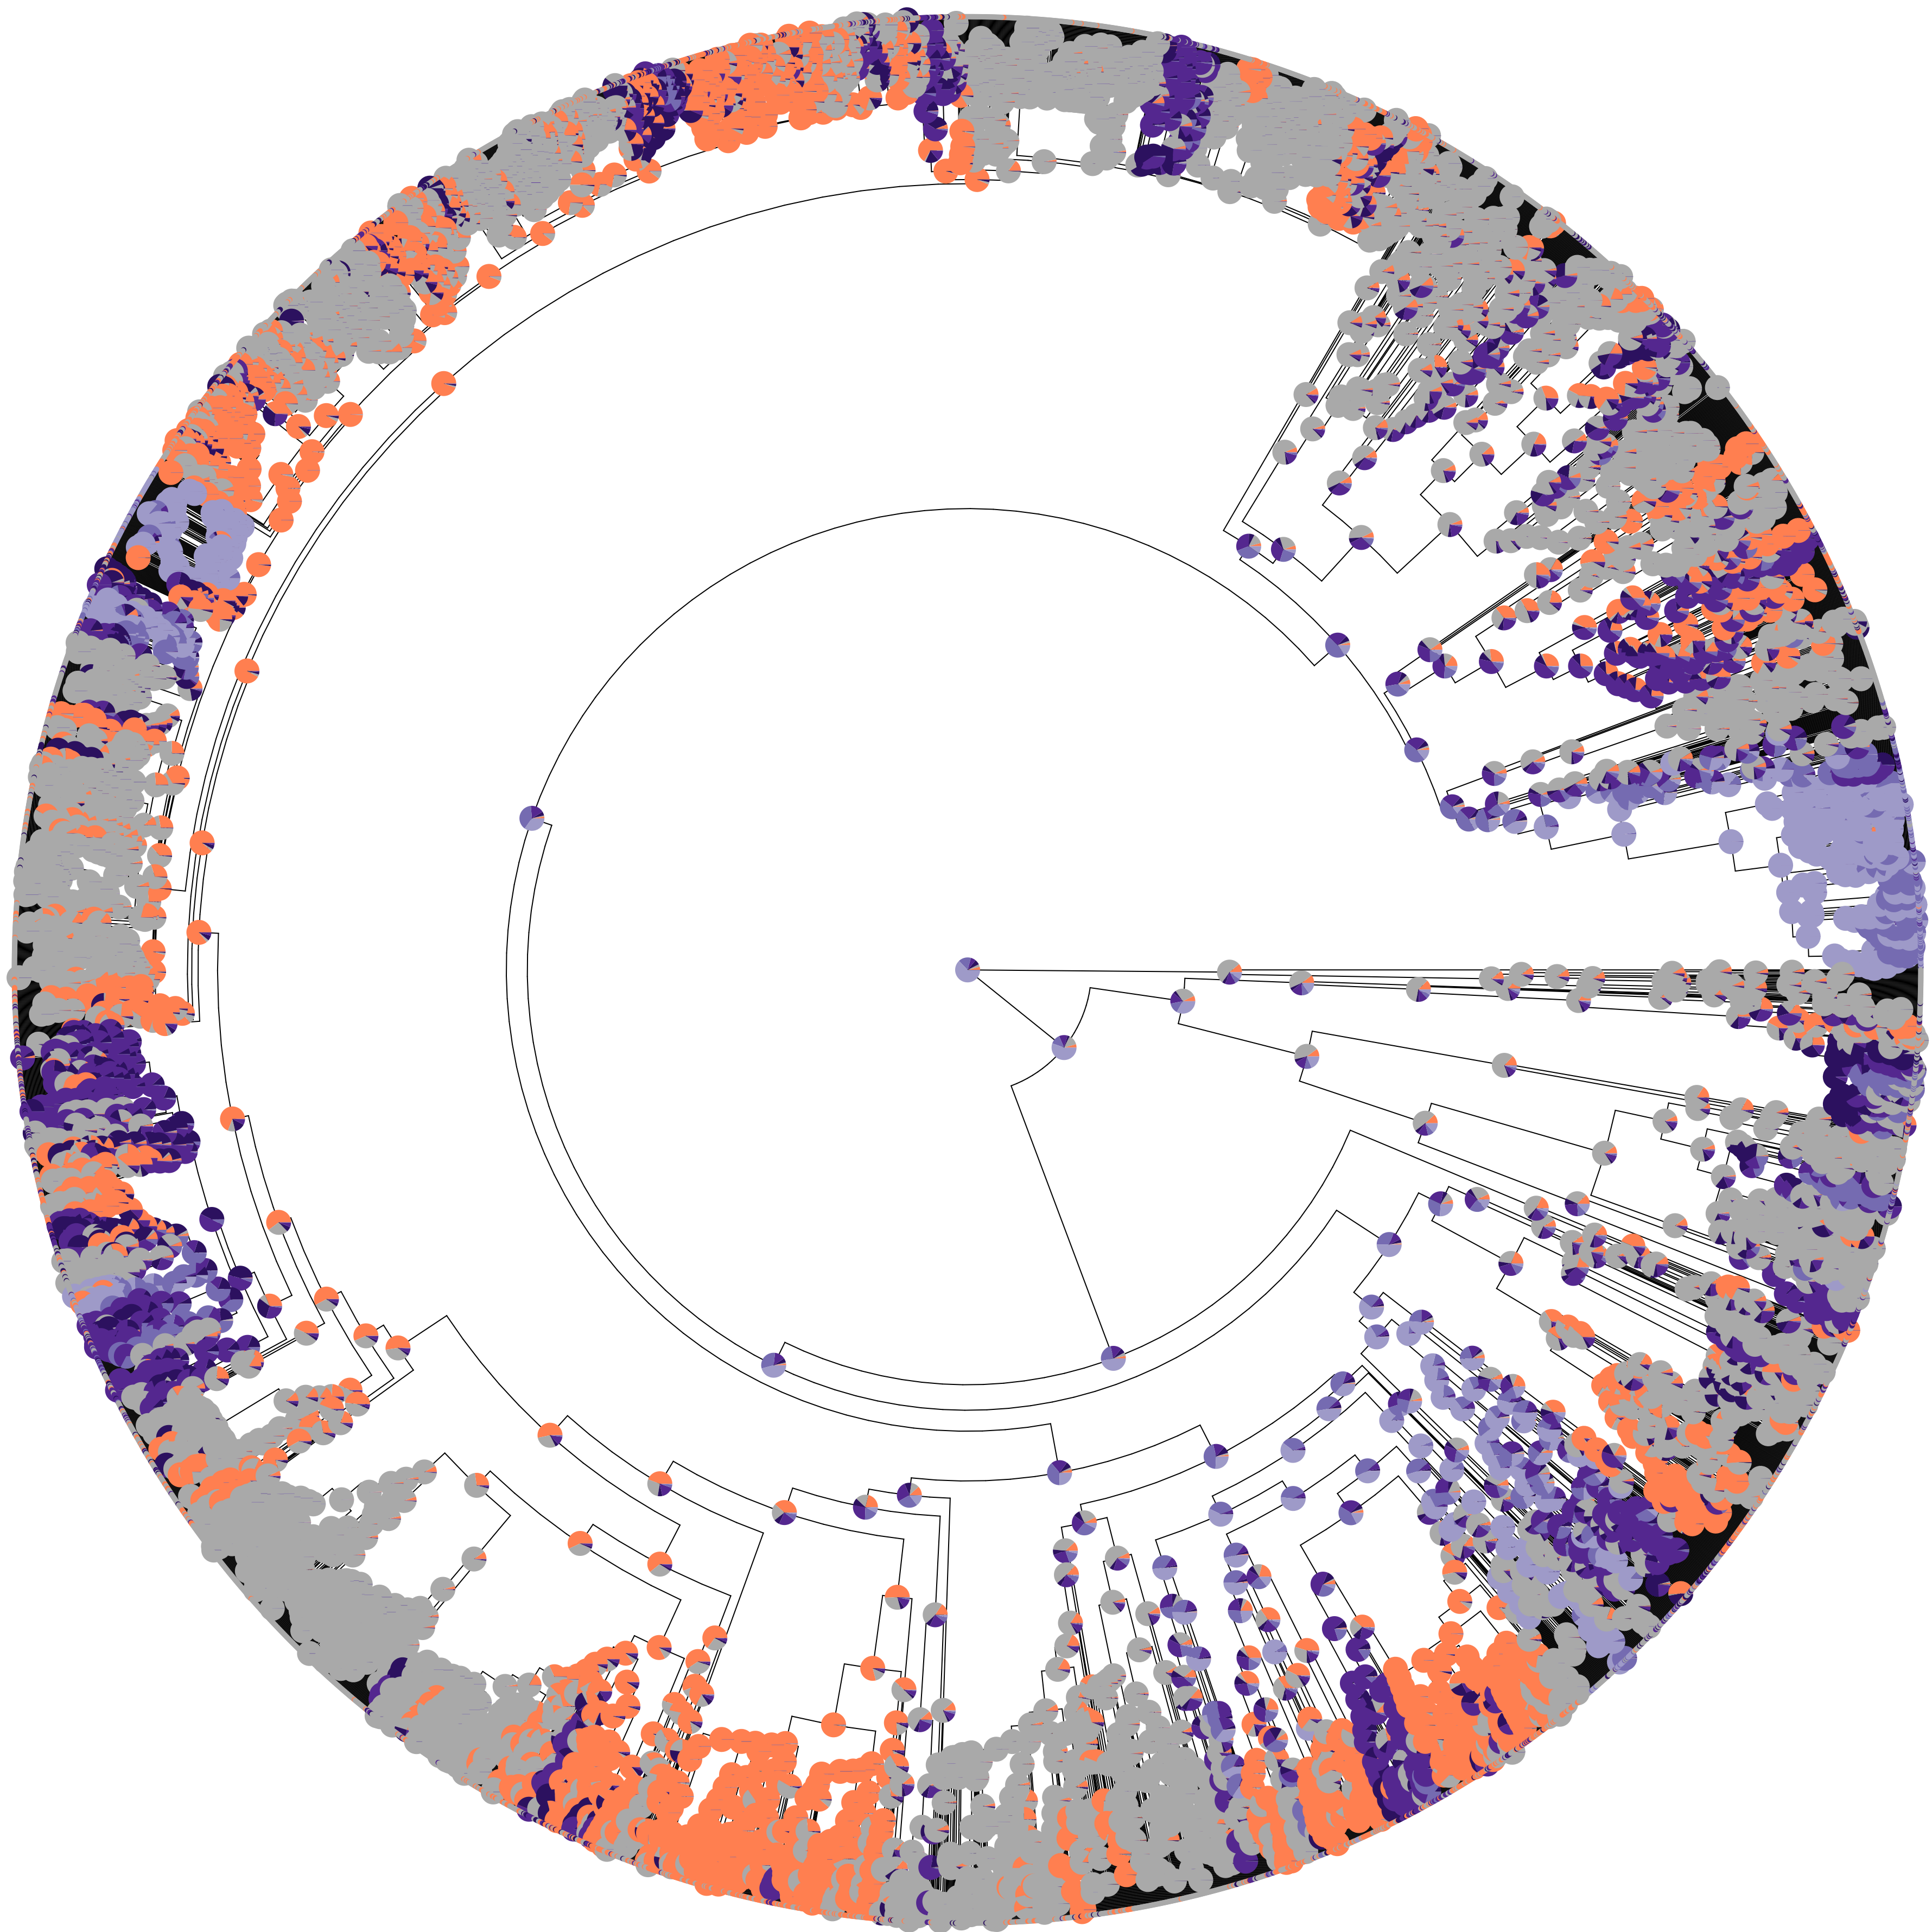

Supplement: Supplementary file 6 [file female_ext_crown.pdf › supp_3/female_ext_crown.pdf]

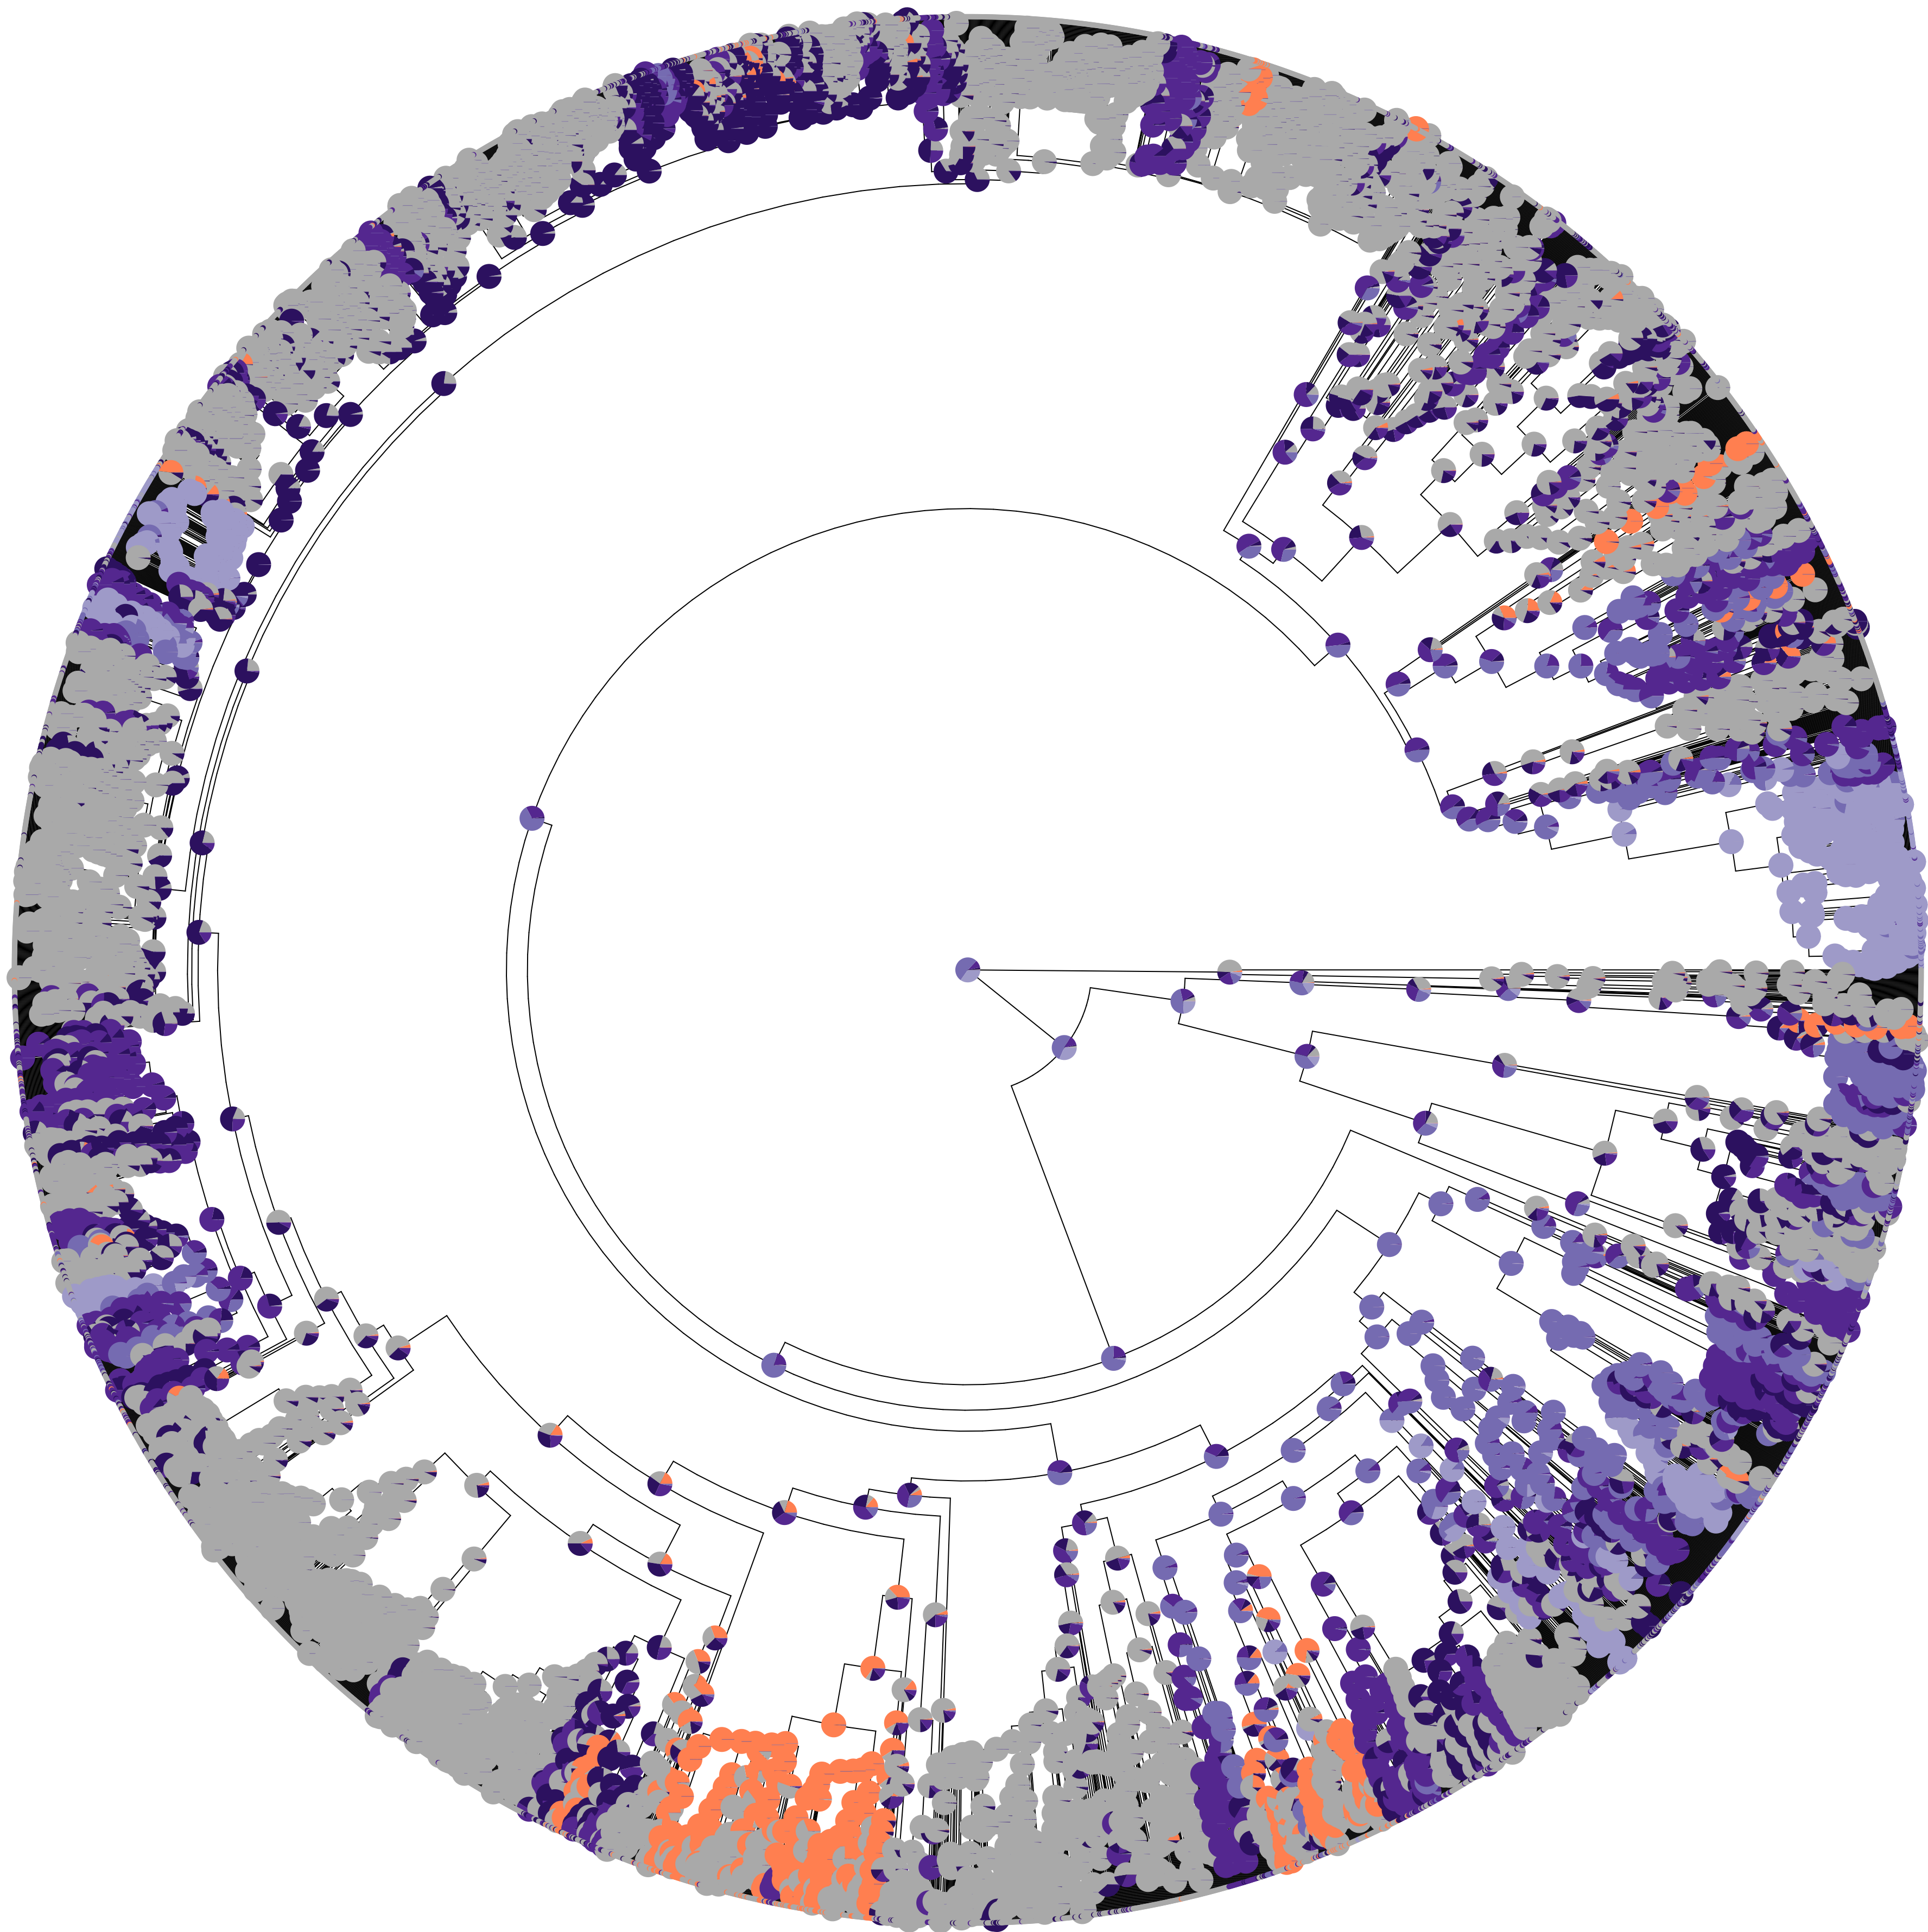

Supplement: Supplementary file 7 [file female_ext_general.pdf › supp_3/female_ext_general.pdf]

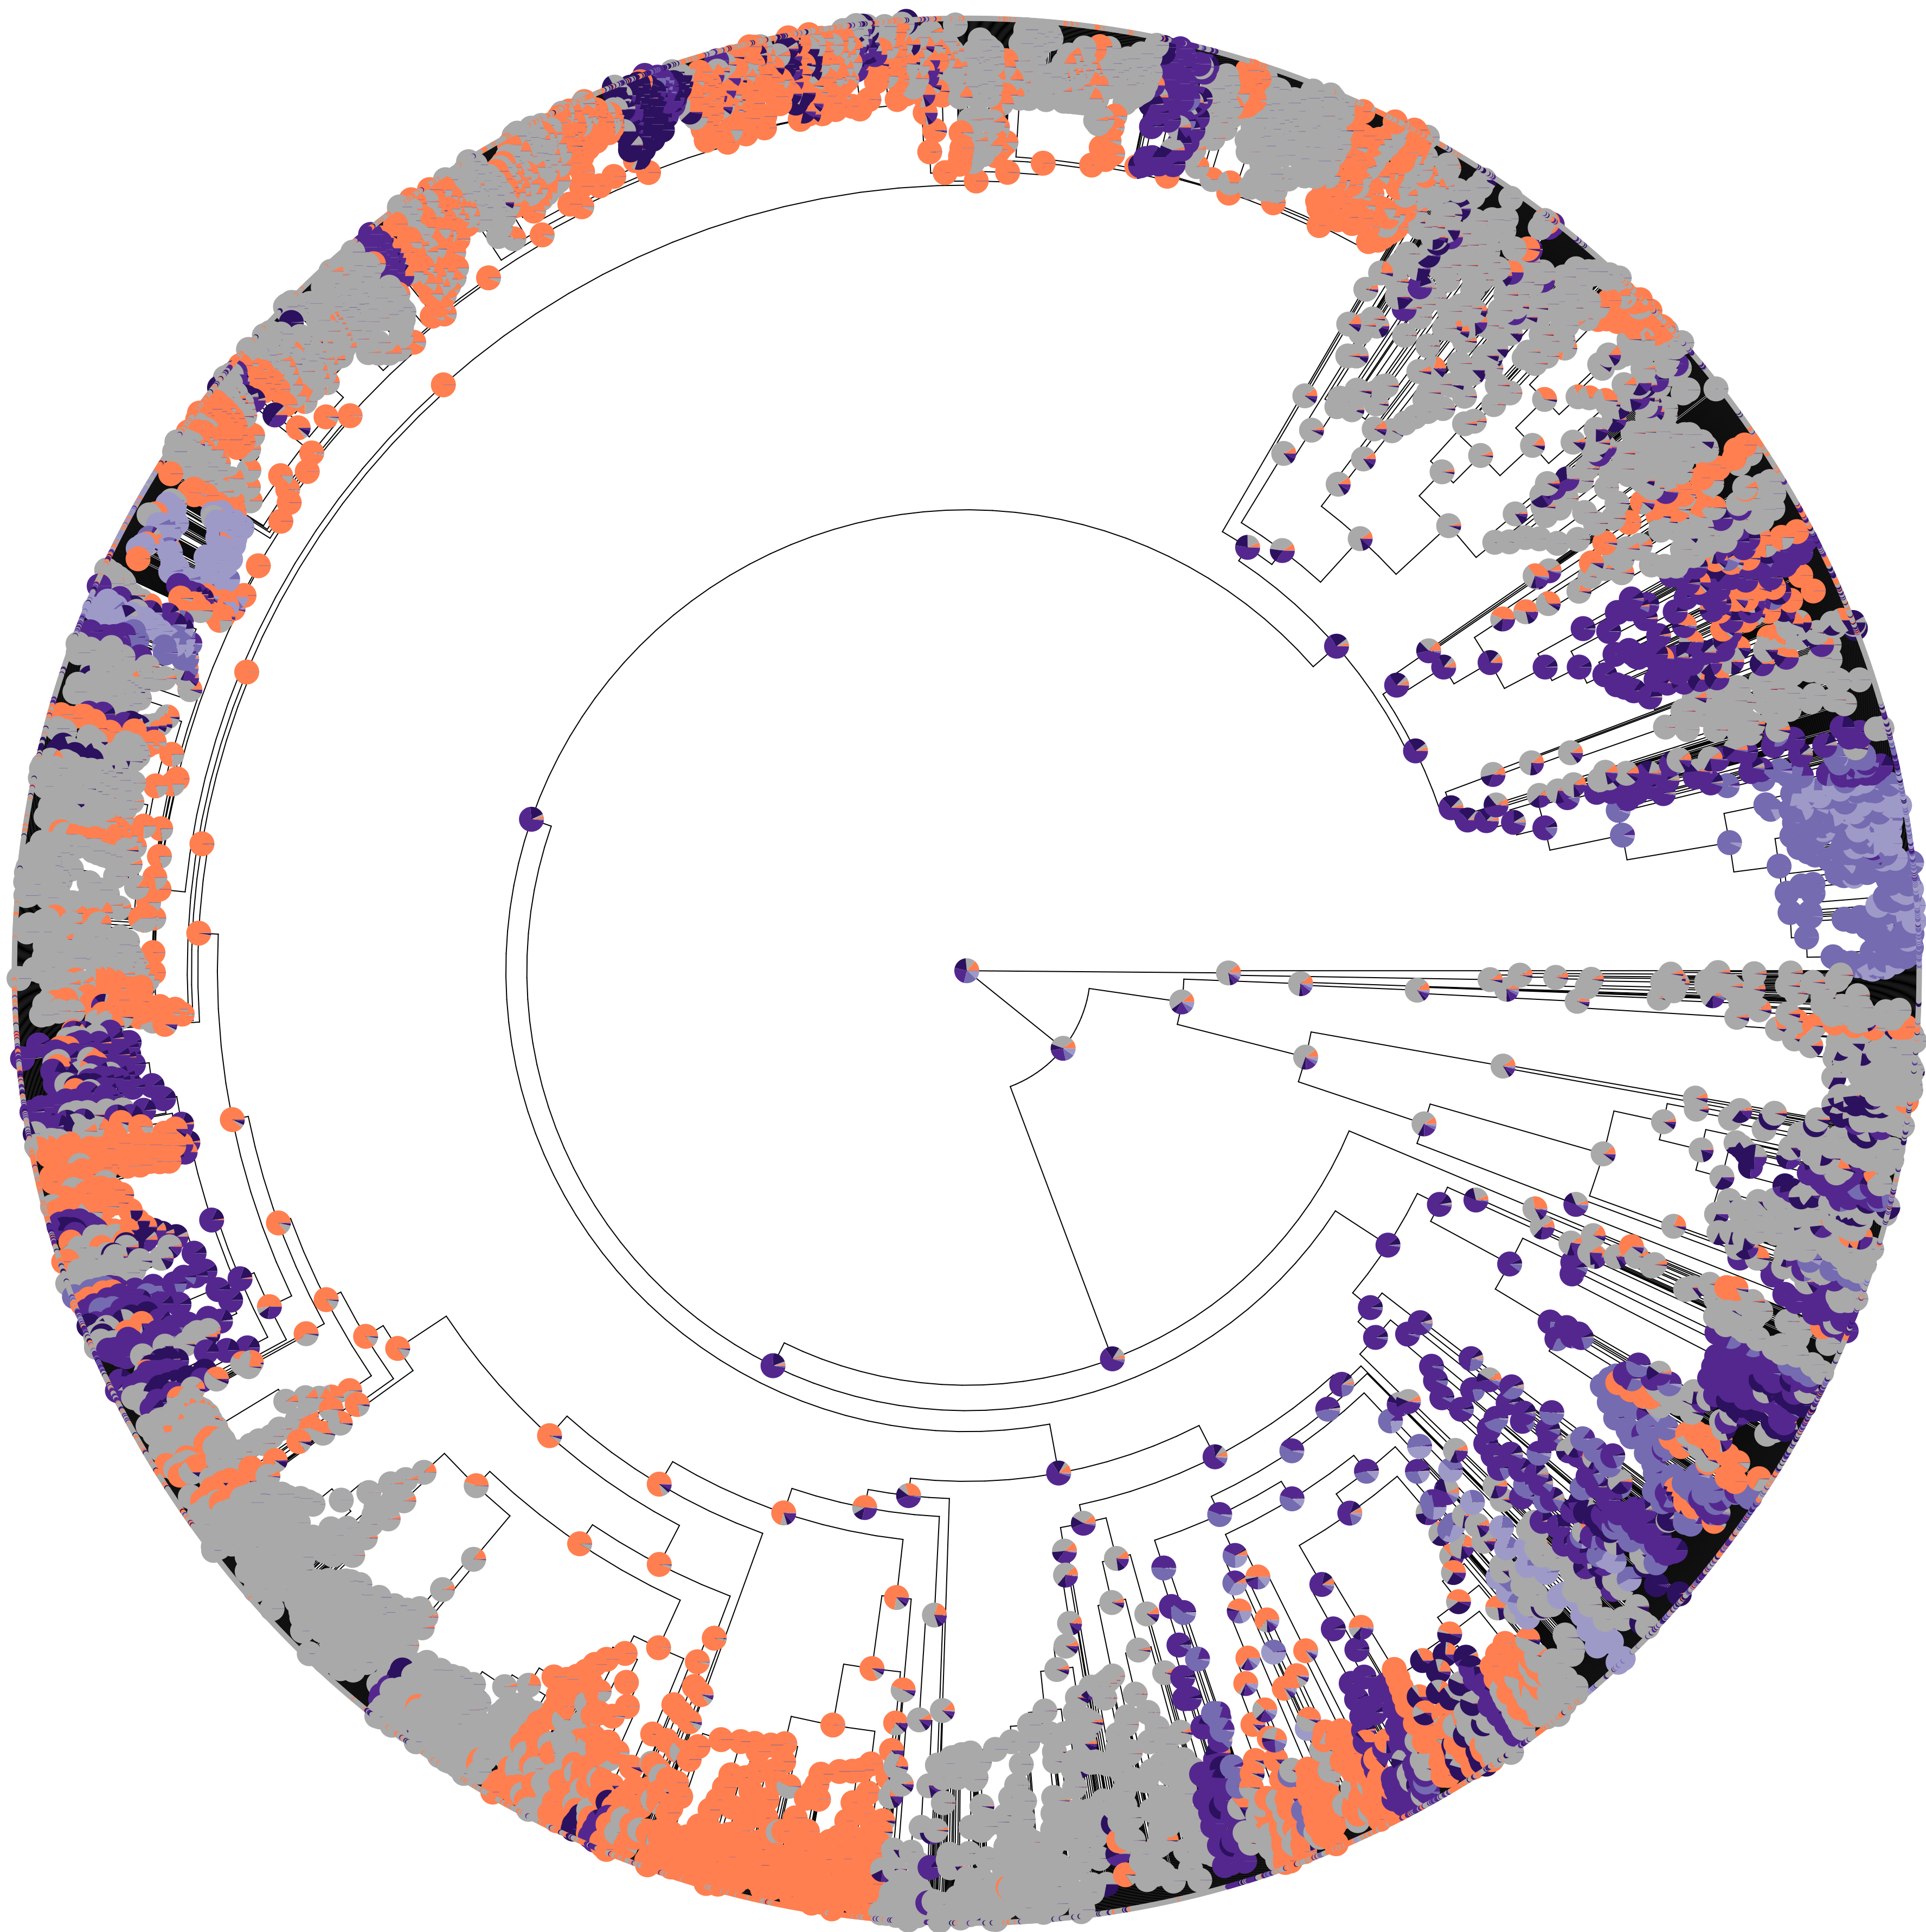

Supplement: Supplementary file 8 [file female_ext_mantle.pdf › supp_3/female_ext_mantle.pdf]

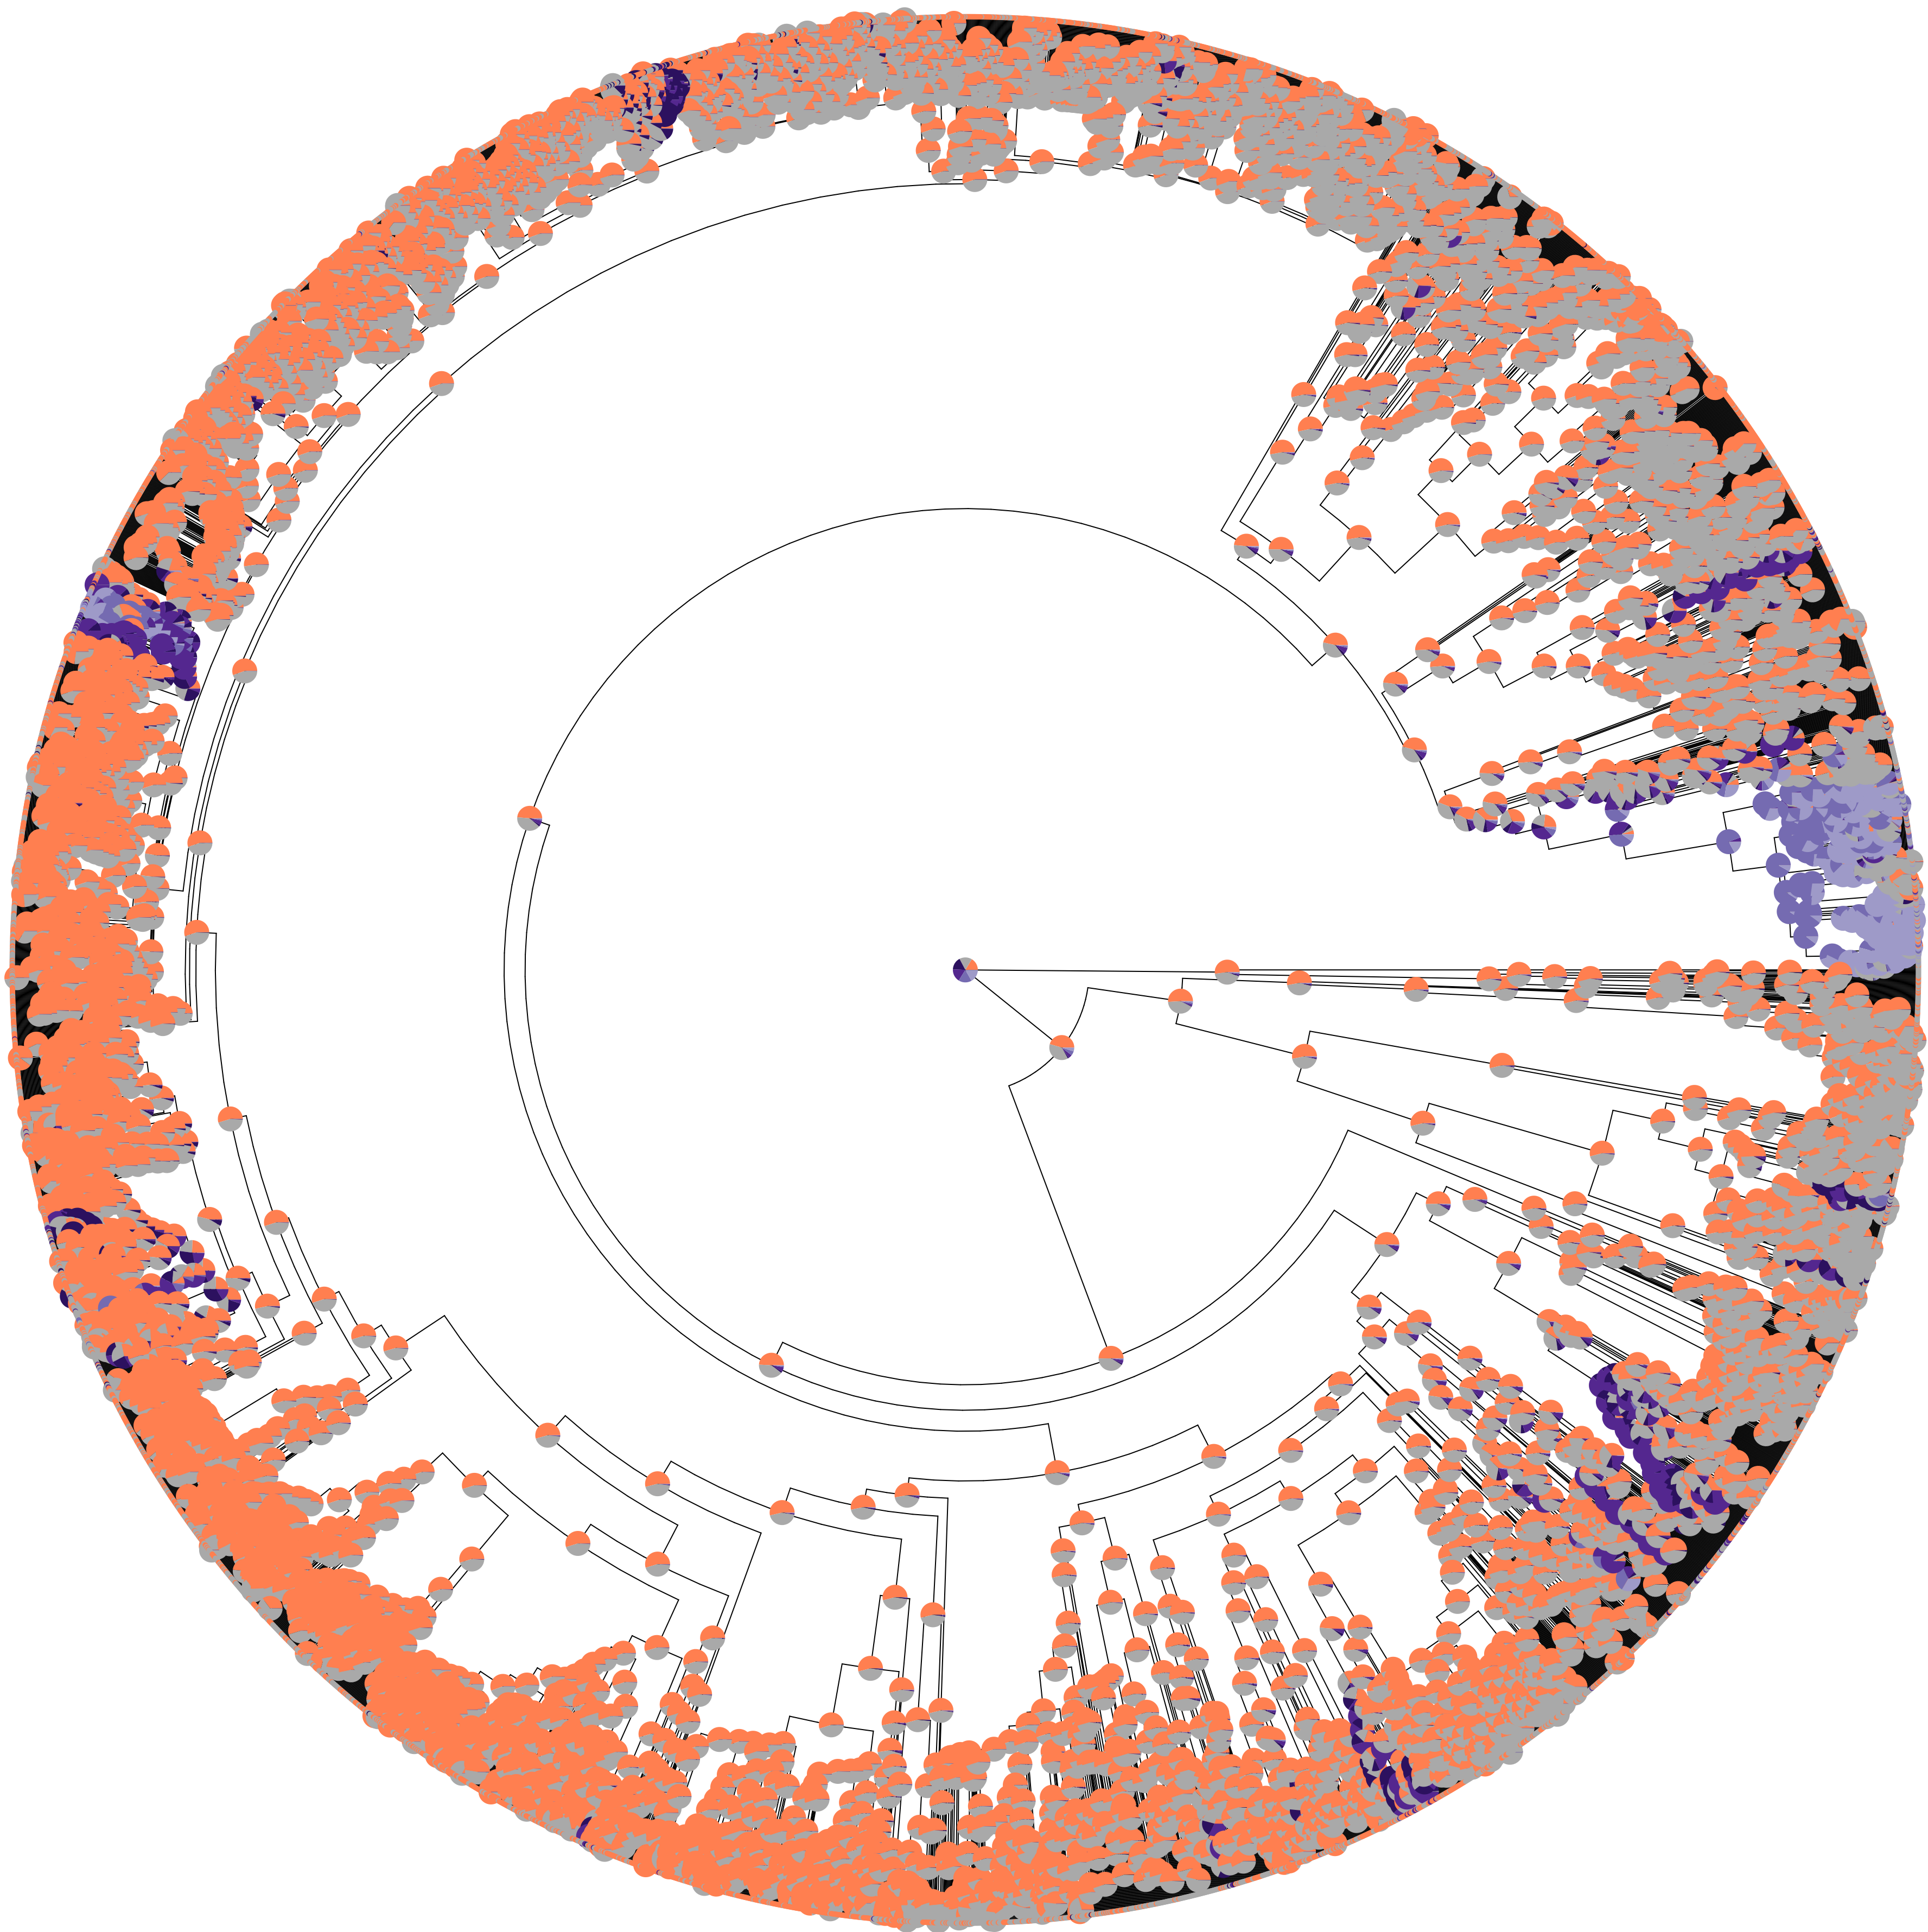

Supplement: Supplementary file 9 [file female_ext_pert_belly.pdf › supp_3/female_ext_pert_belly.pdf]

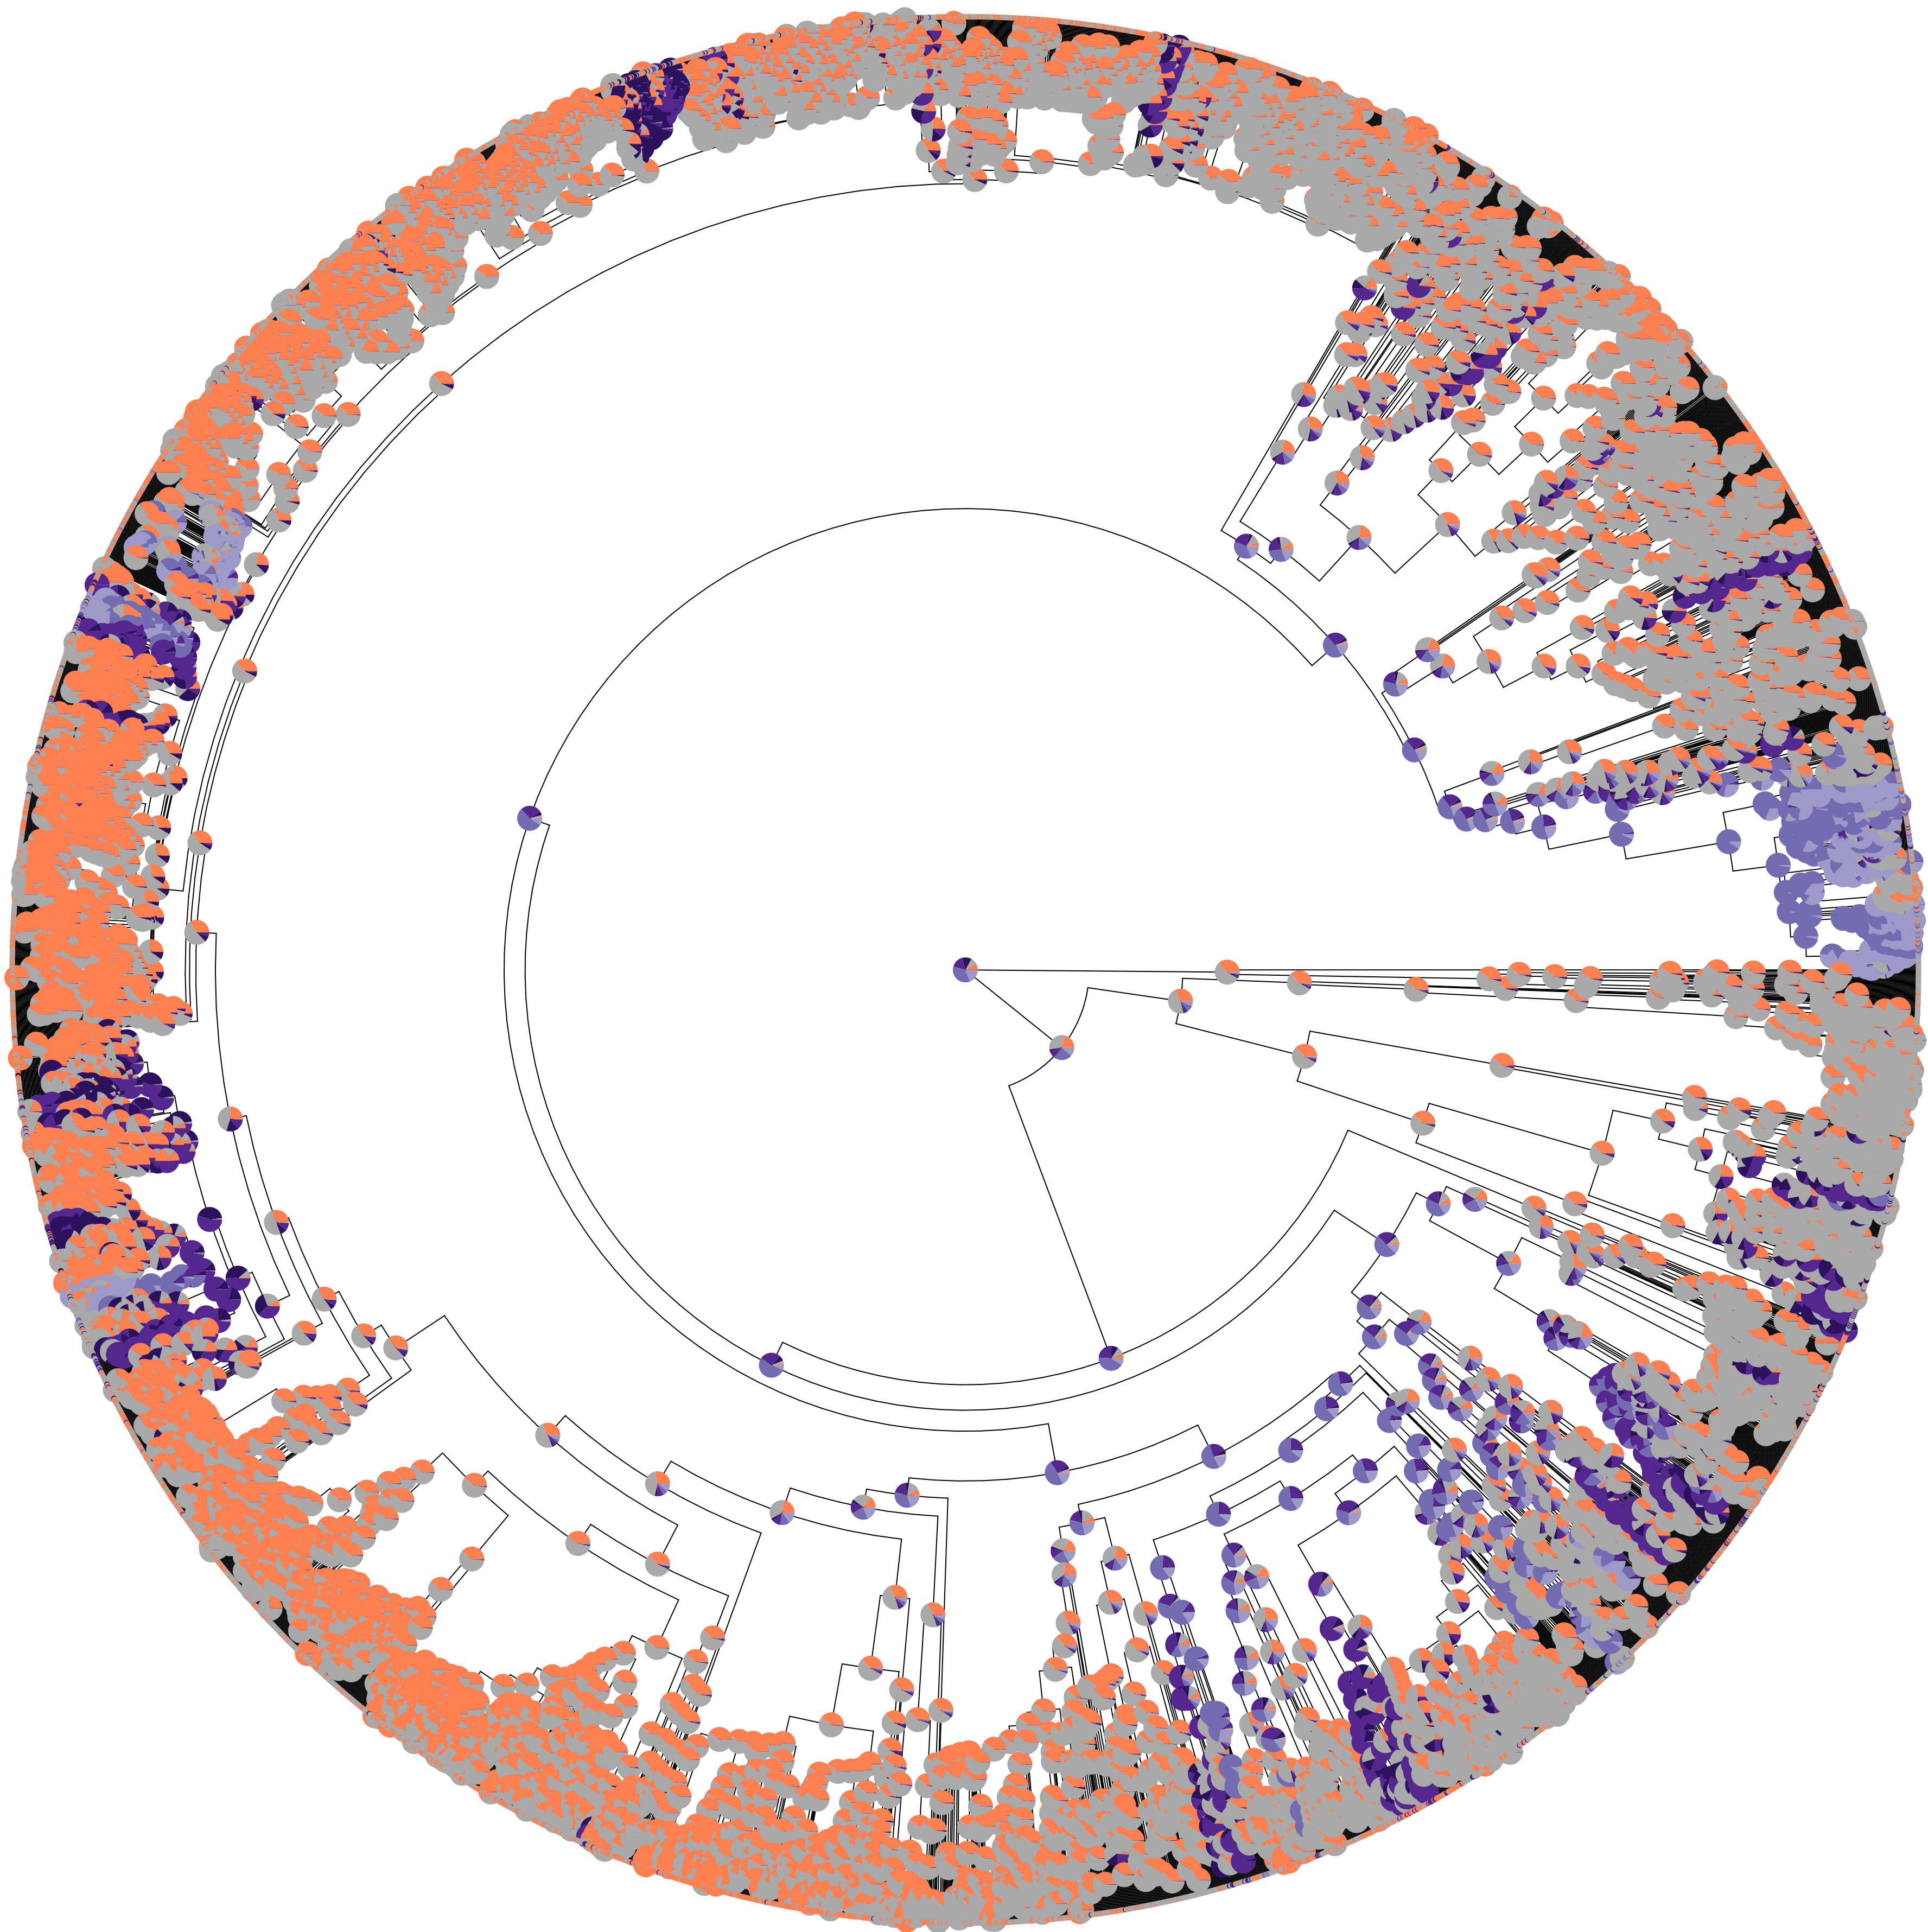

Supplement: Supplementary file 10 [file female_ext_pert_breast.pdf › supp_3/female_ext_pert_breast.pdf]

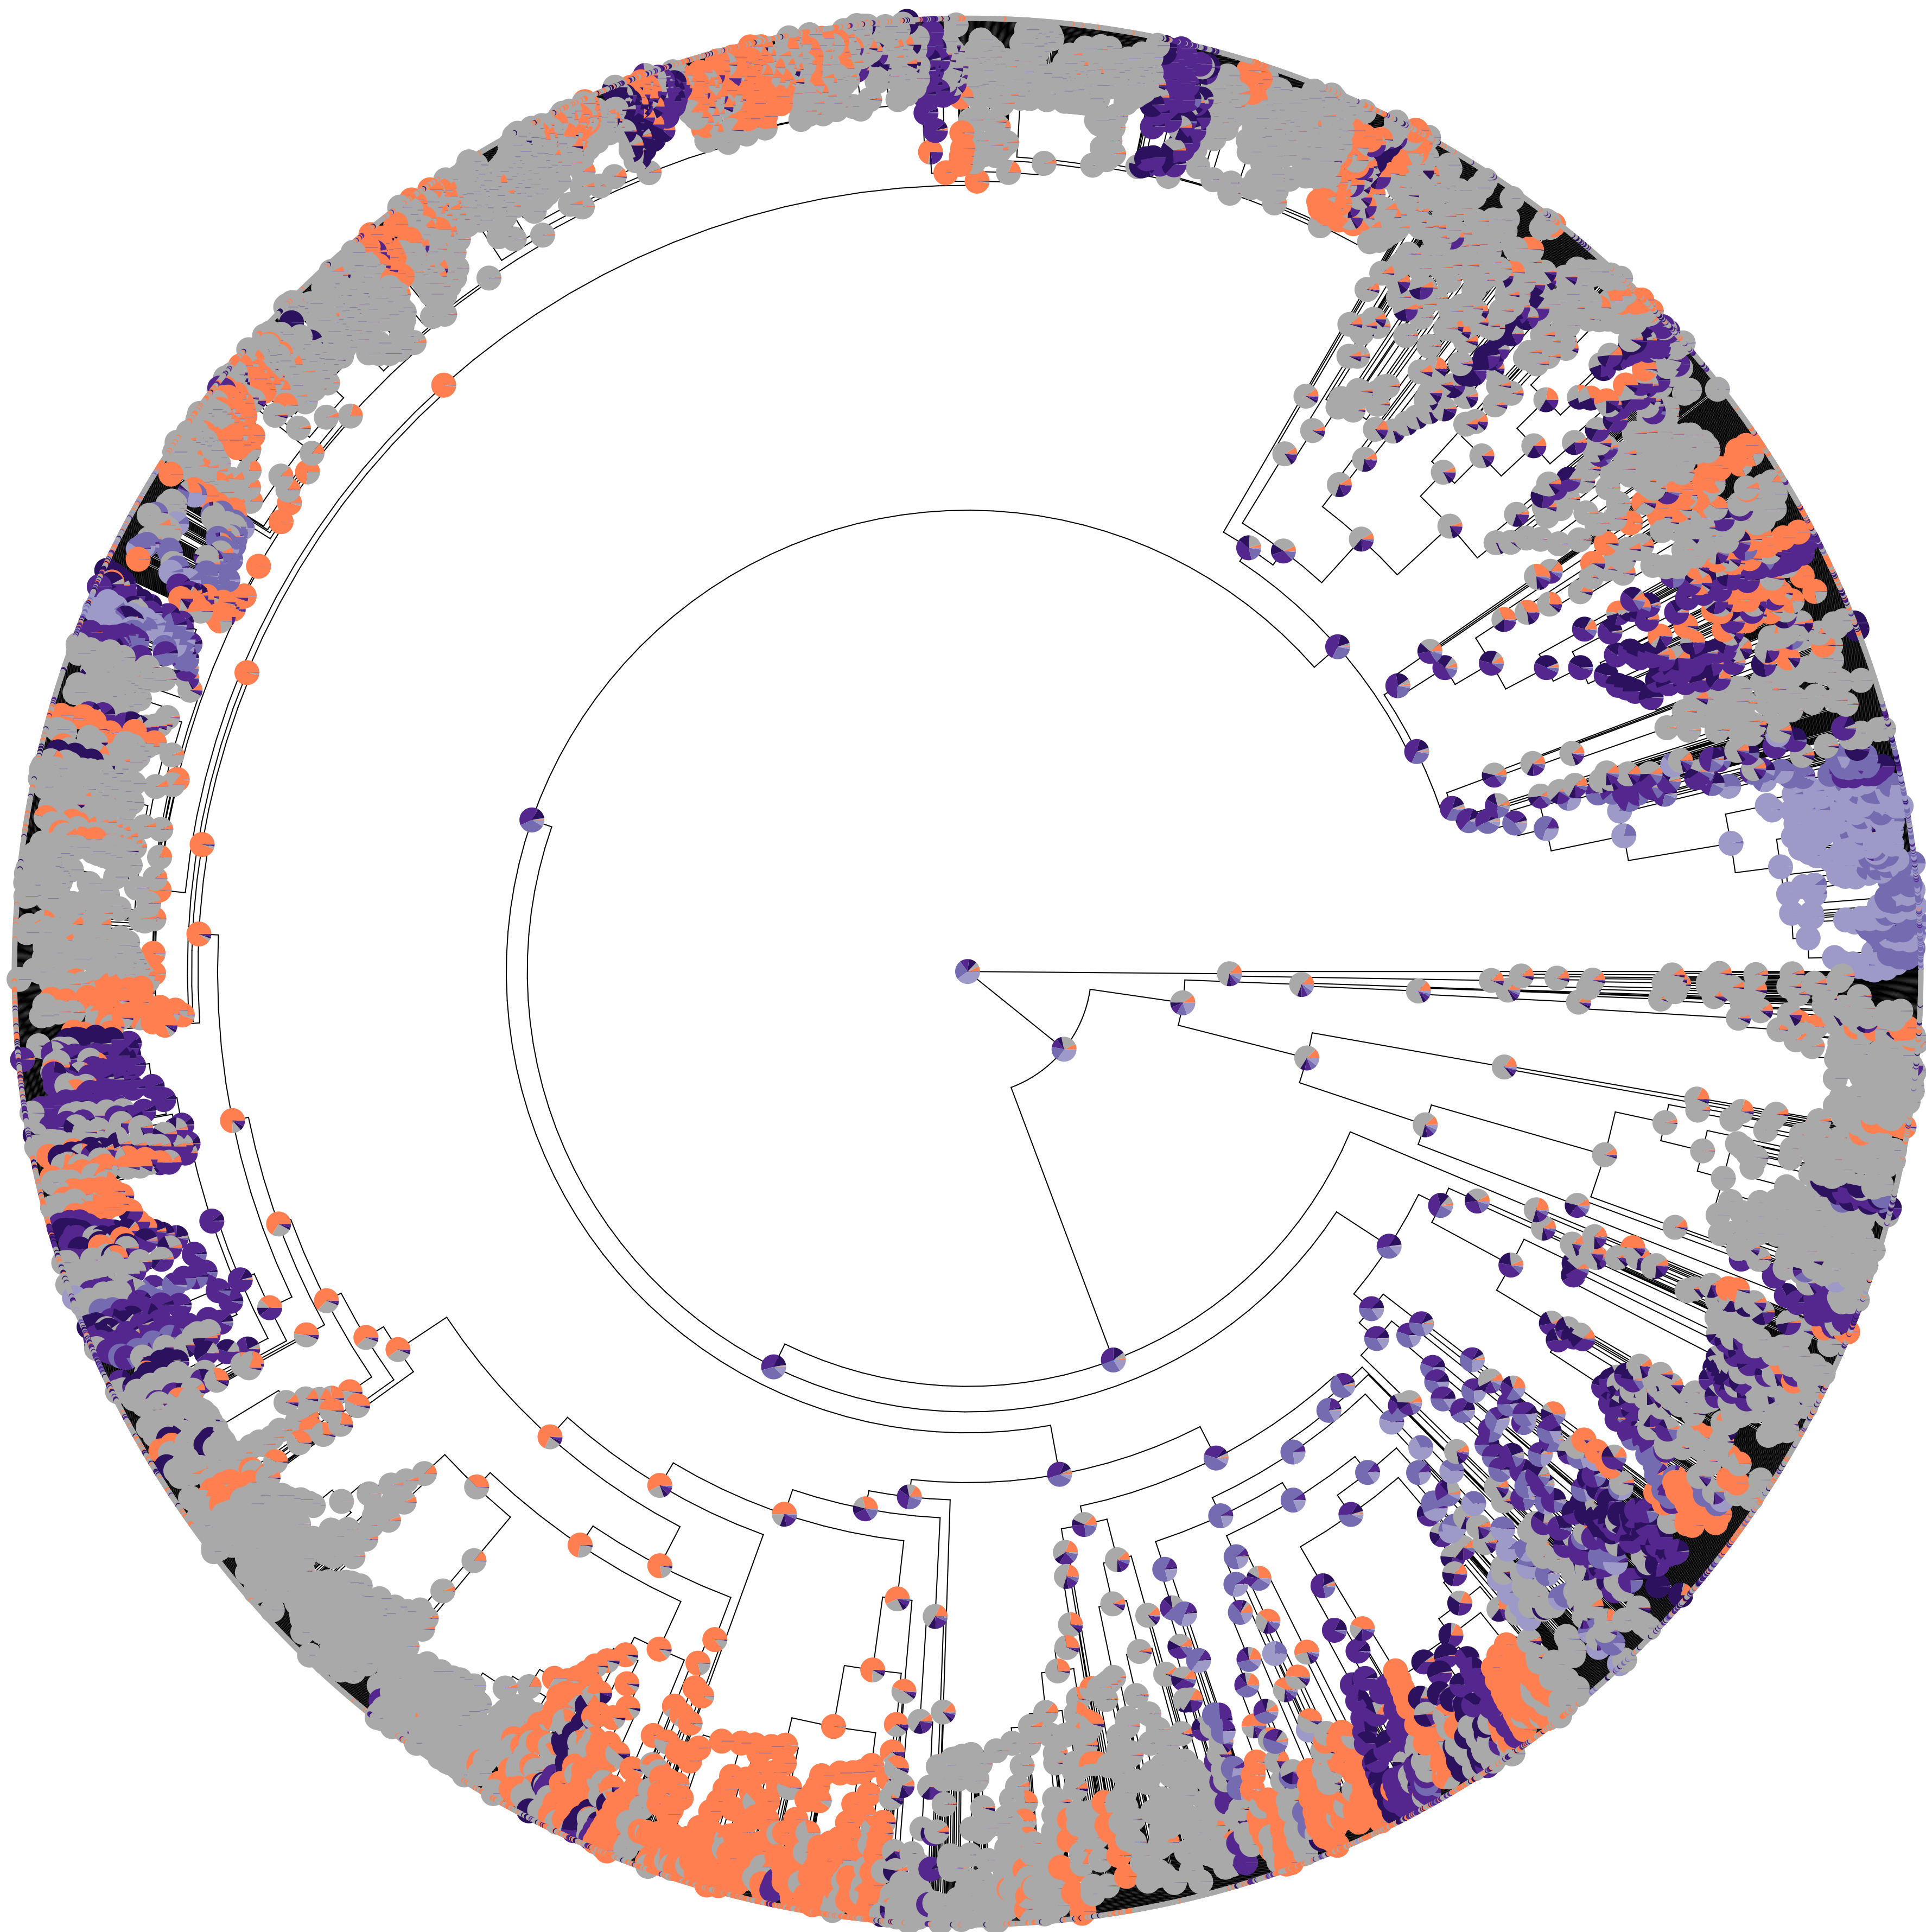

Supplement: Supplementary file 11 [file female_ext_pert_crown.pdf › supp_3/female_ext_pert_crown.pdf]

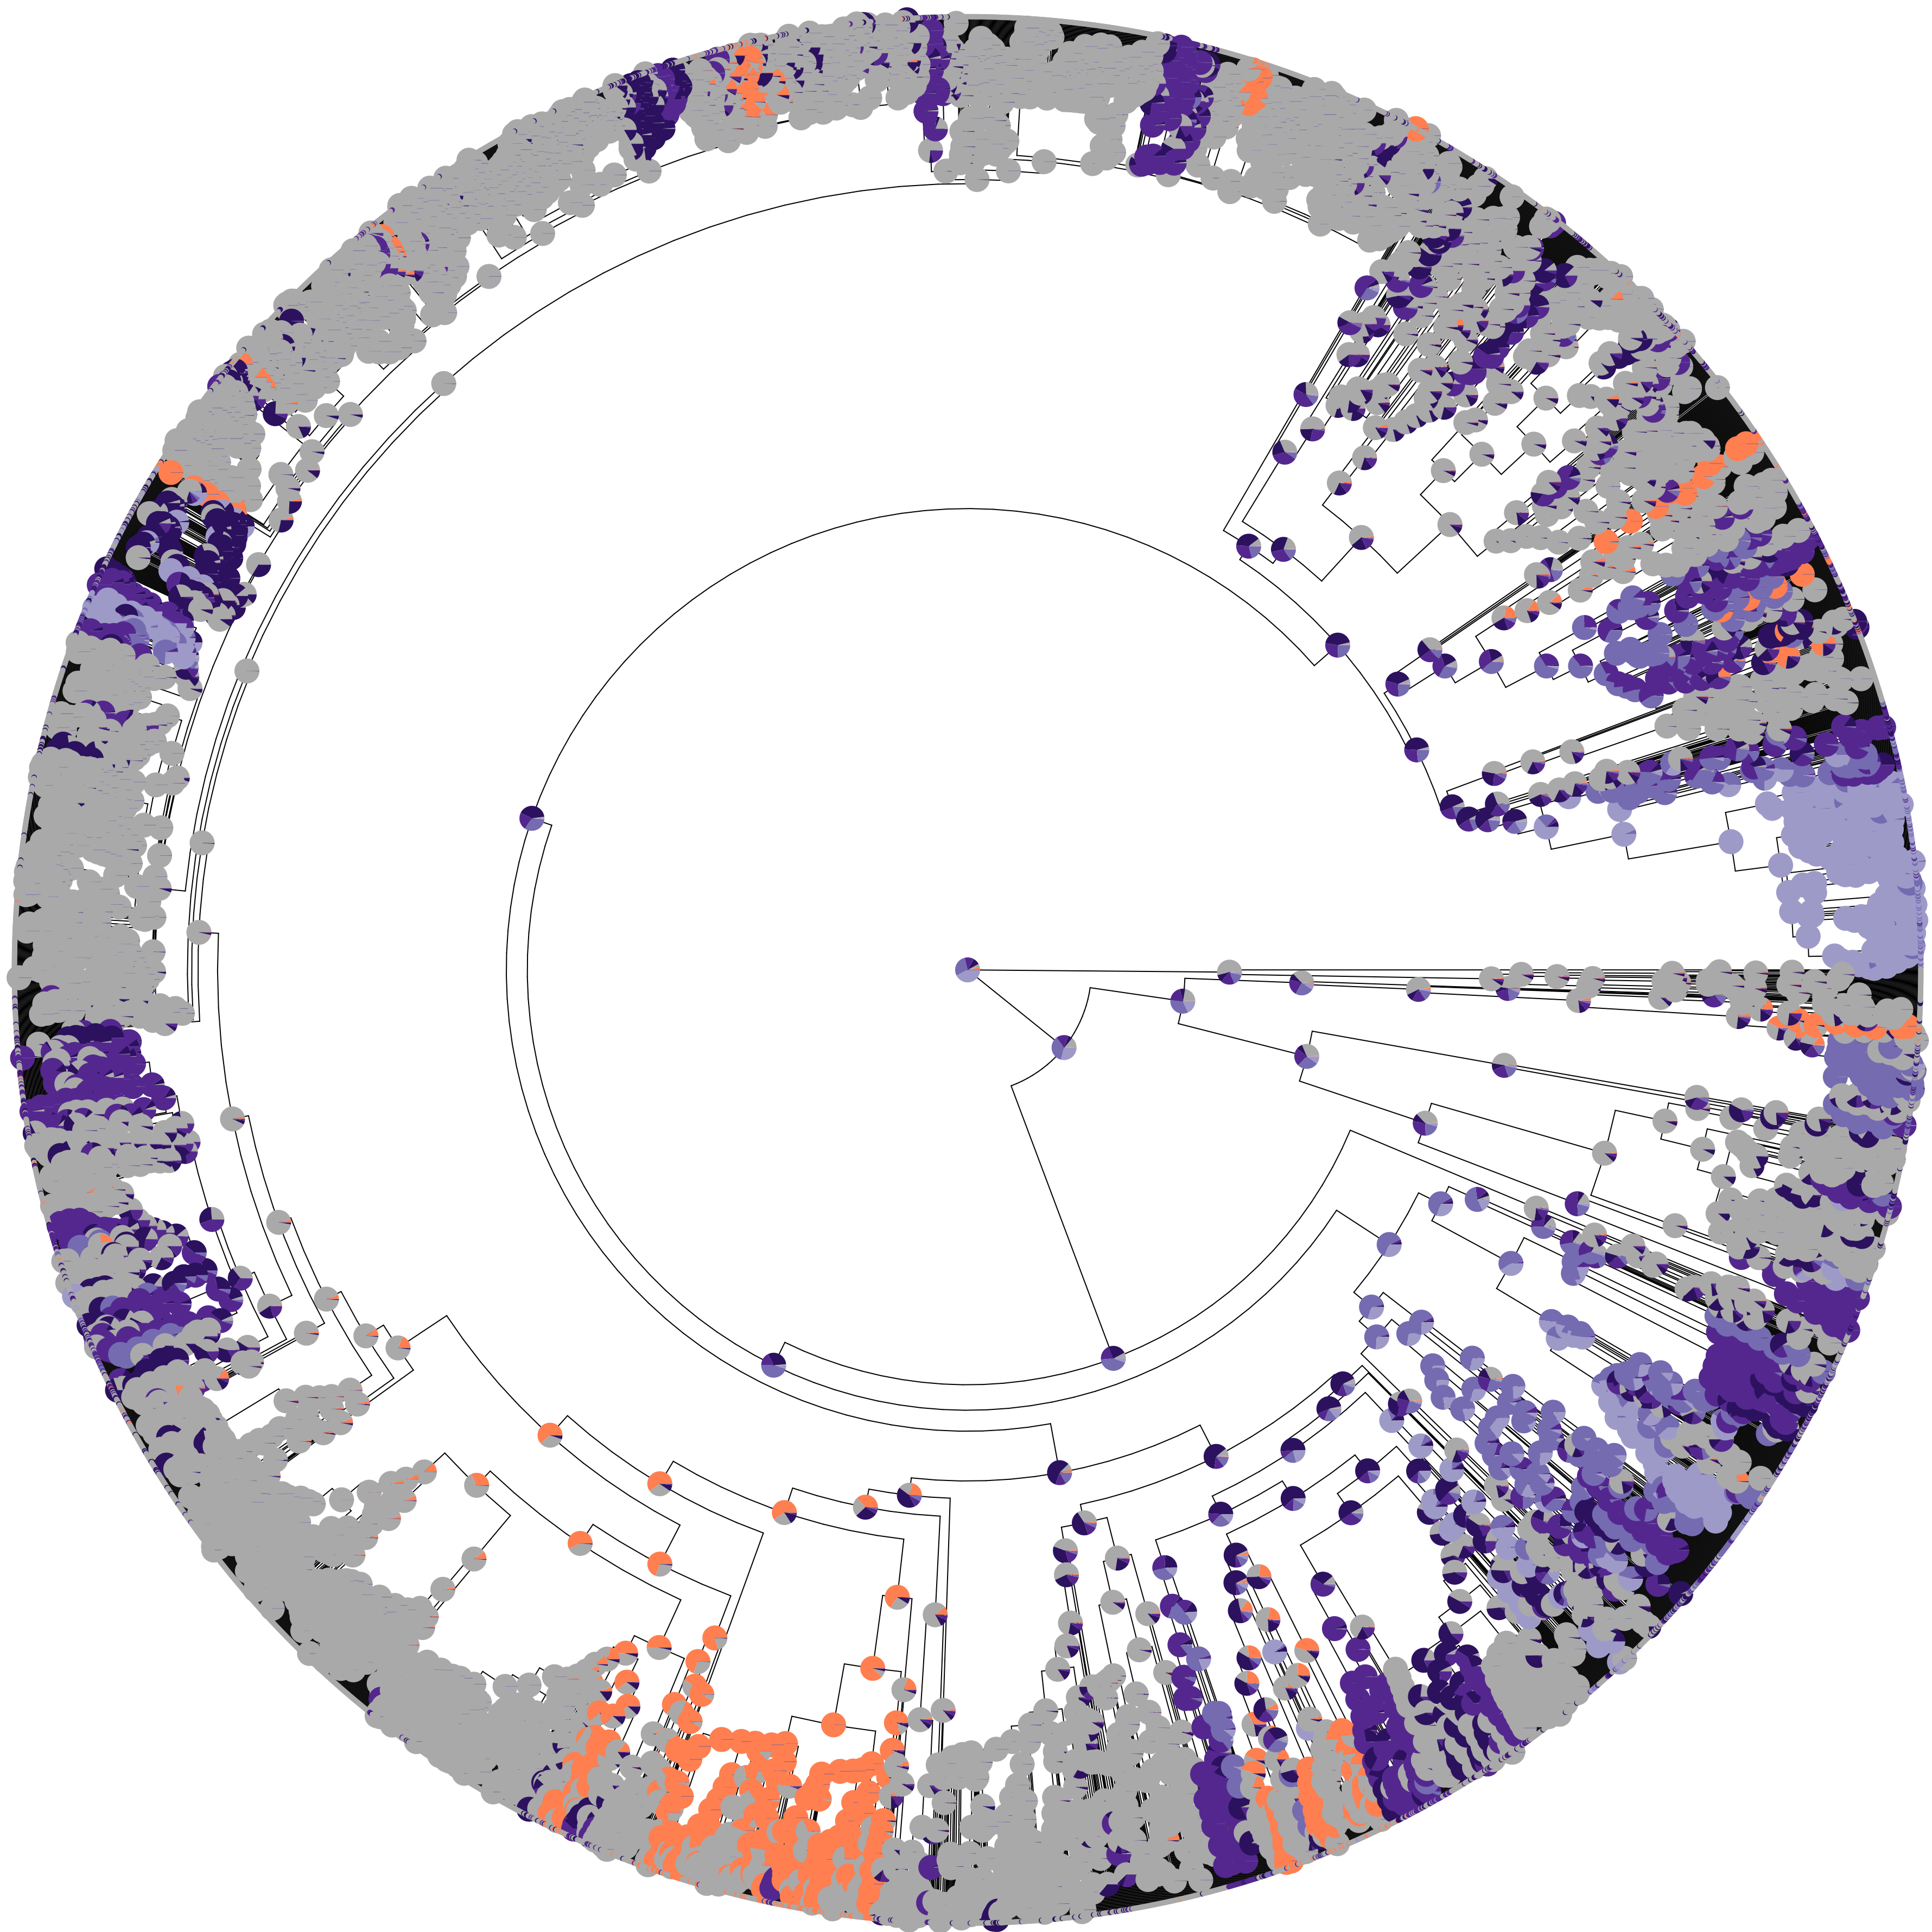

Supplement: Supplementary file 12 [file female_ext_pert_general.pdf › supp_3/female_ext_pert_general.pdf]

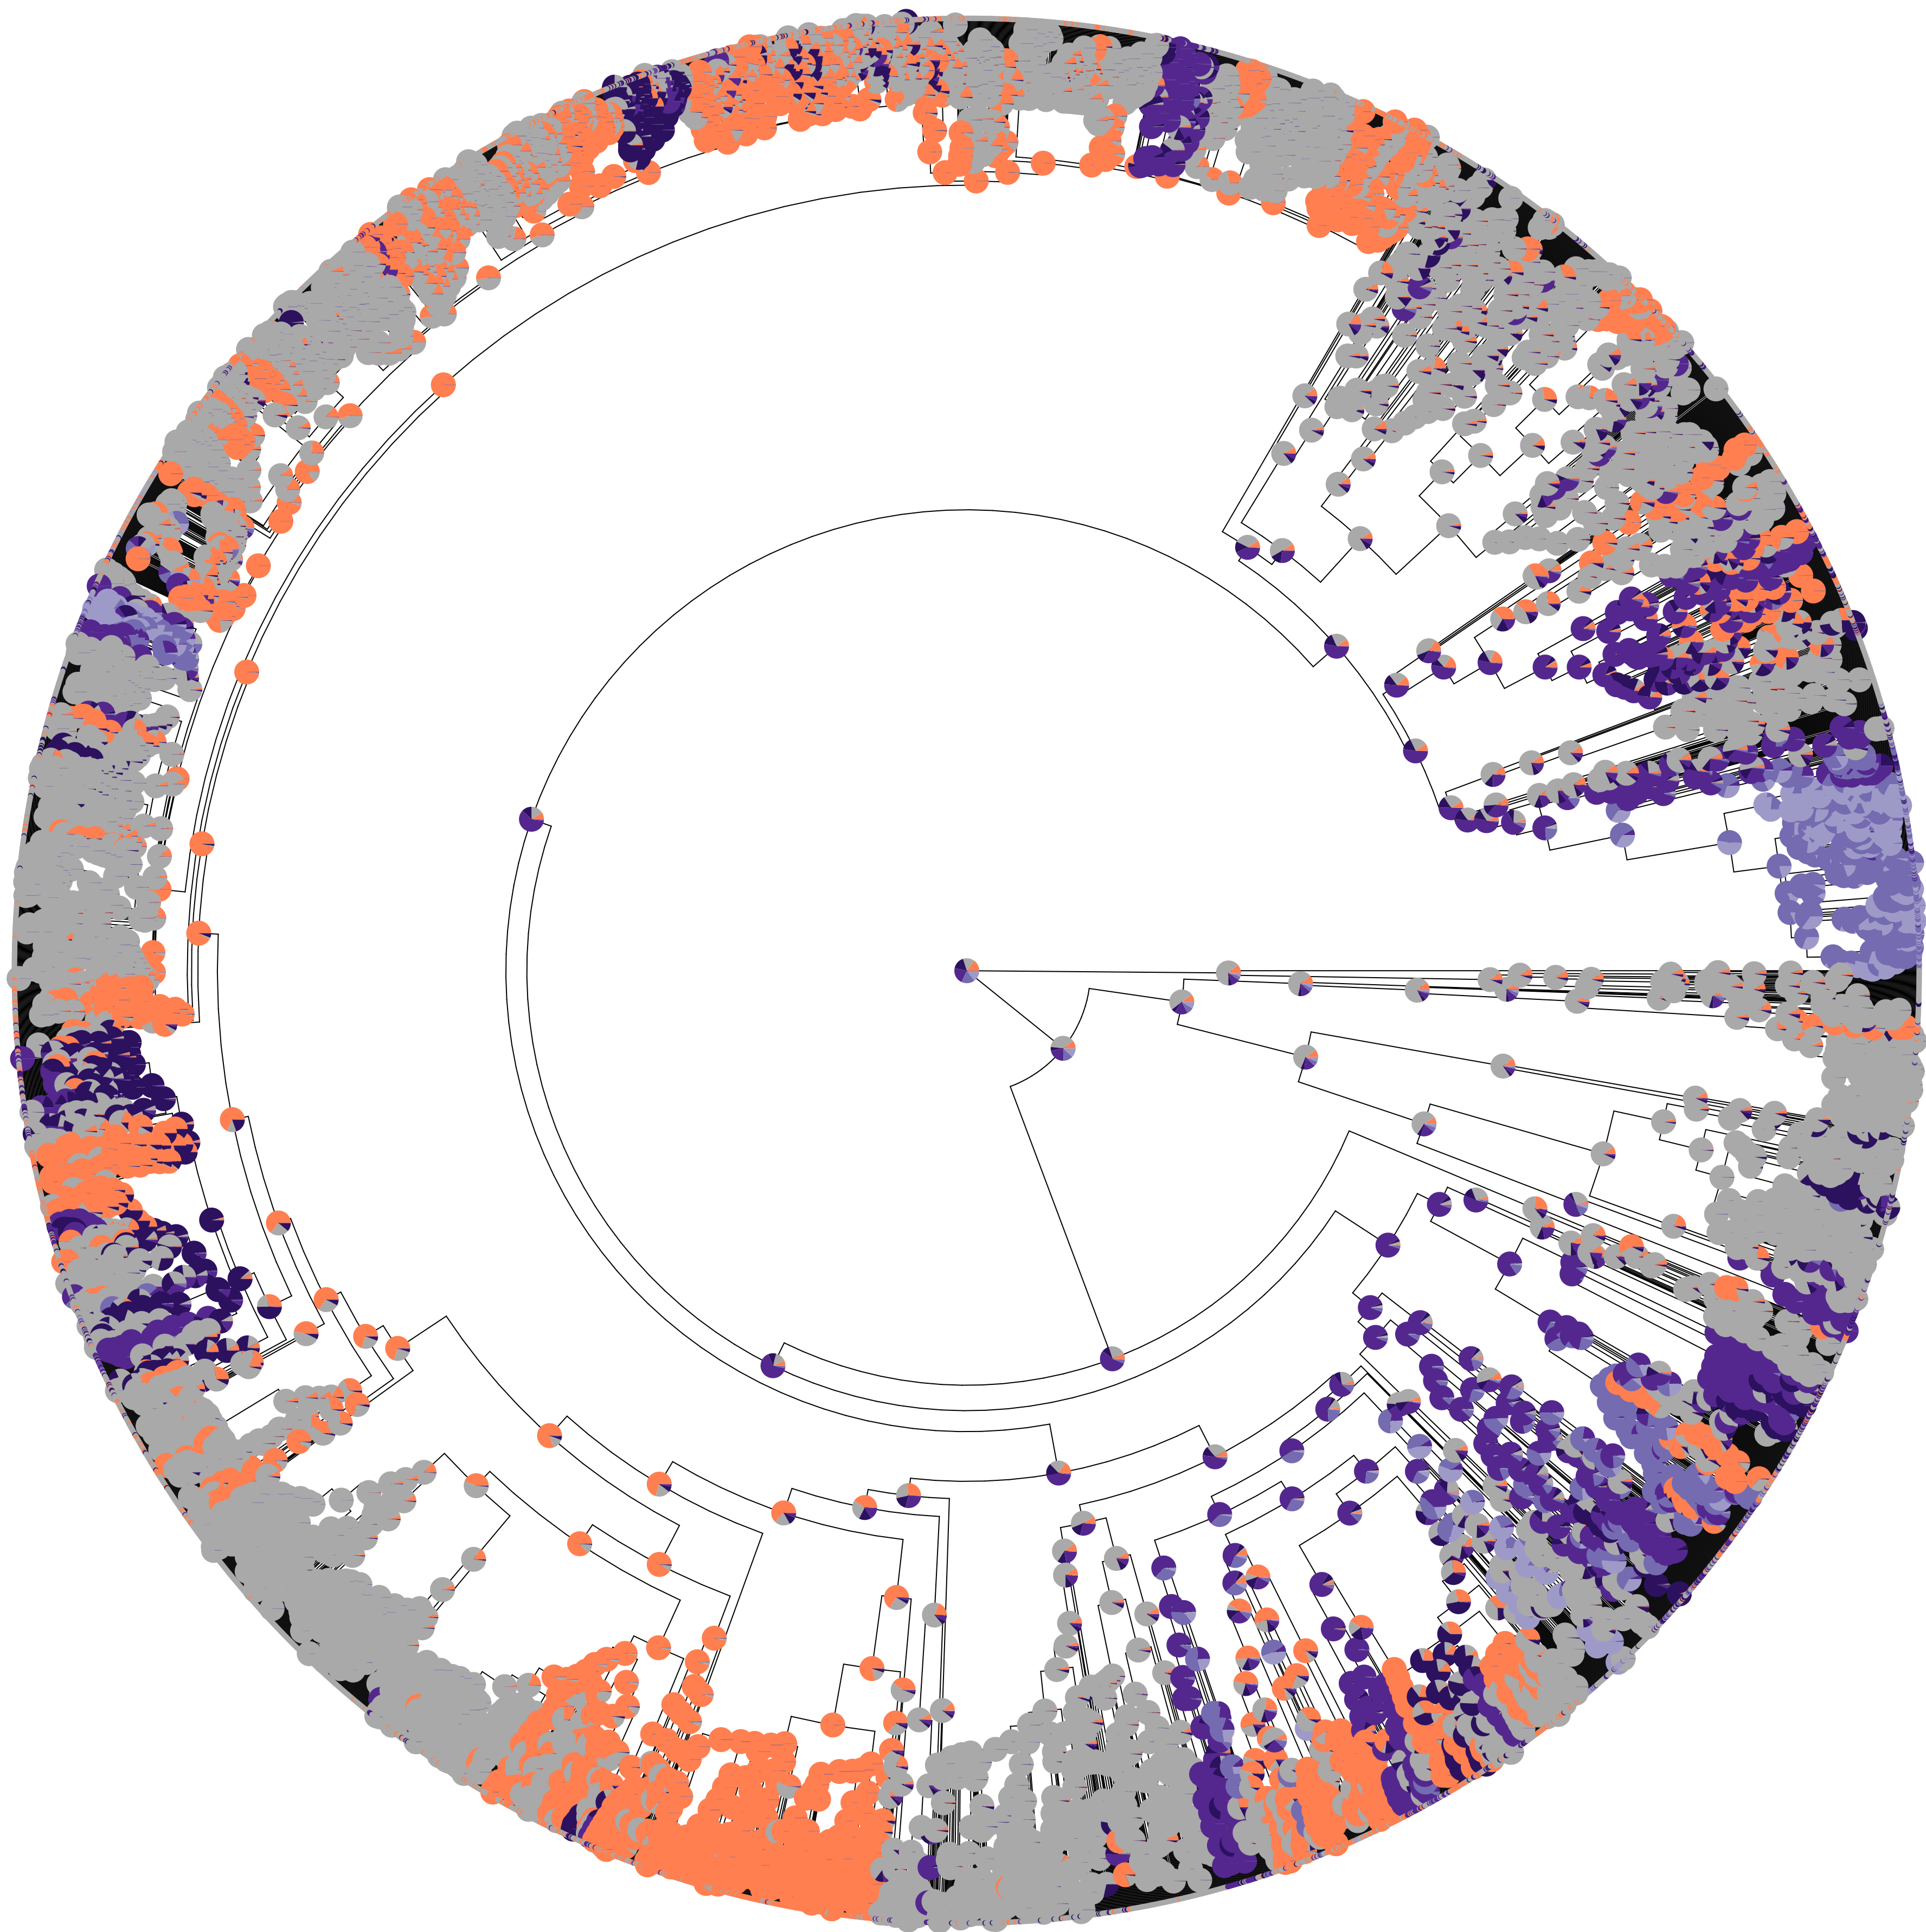

Supplement: Supplementary file 13 [file female_ext_pert_mantle.pdf › supp_3/female_ext_pert_mantle.pdf]

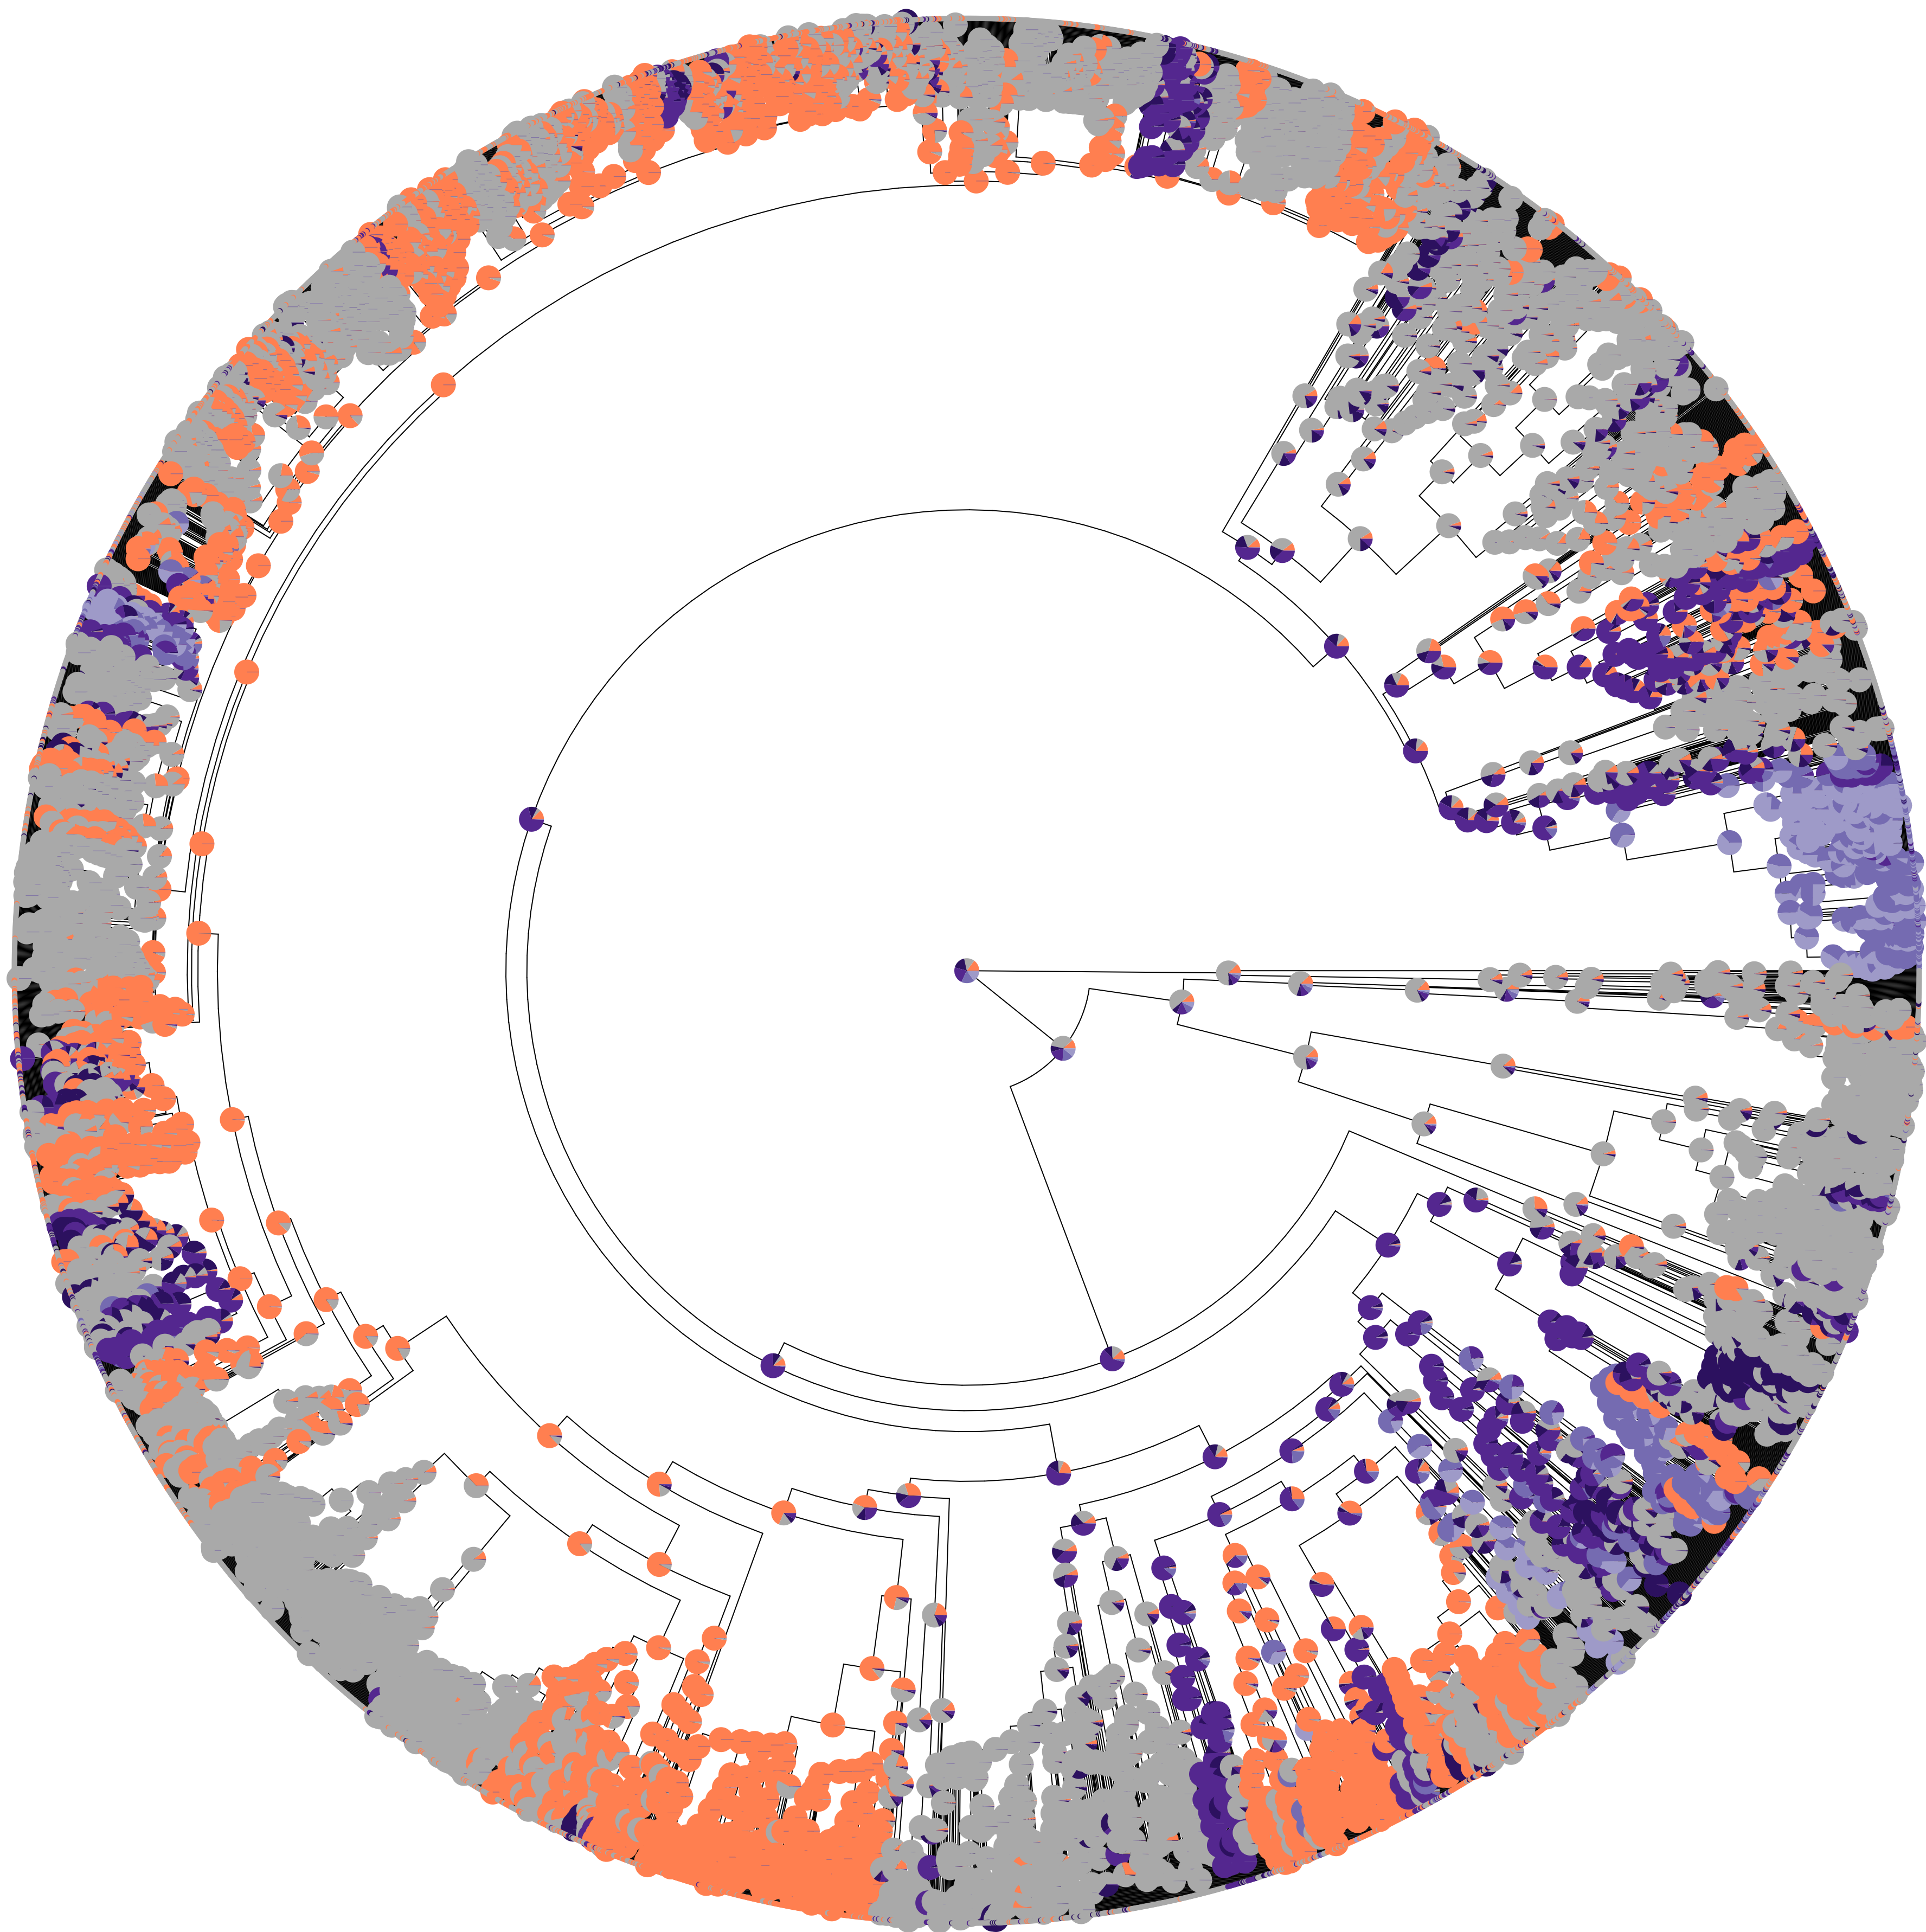

Supplement: Supplementary file 14 [file female_ext_pert_rump.pdf › supp_3/female_ext_pert_rump.pdf]

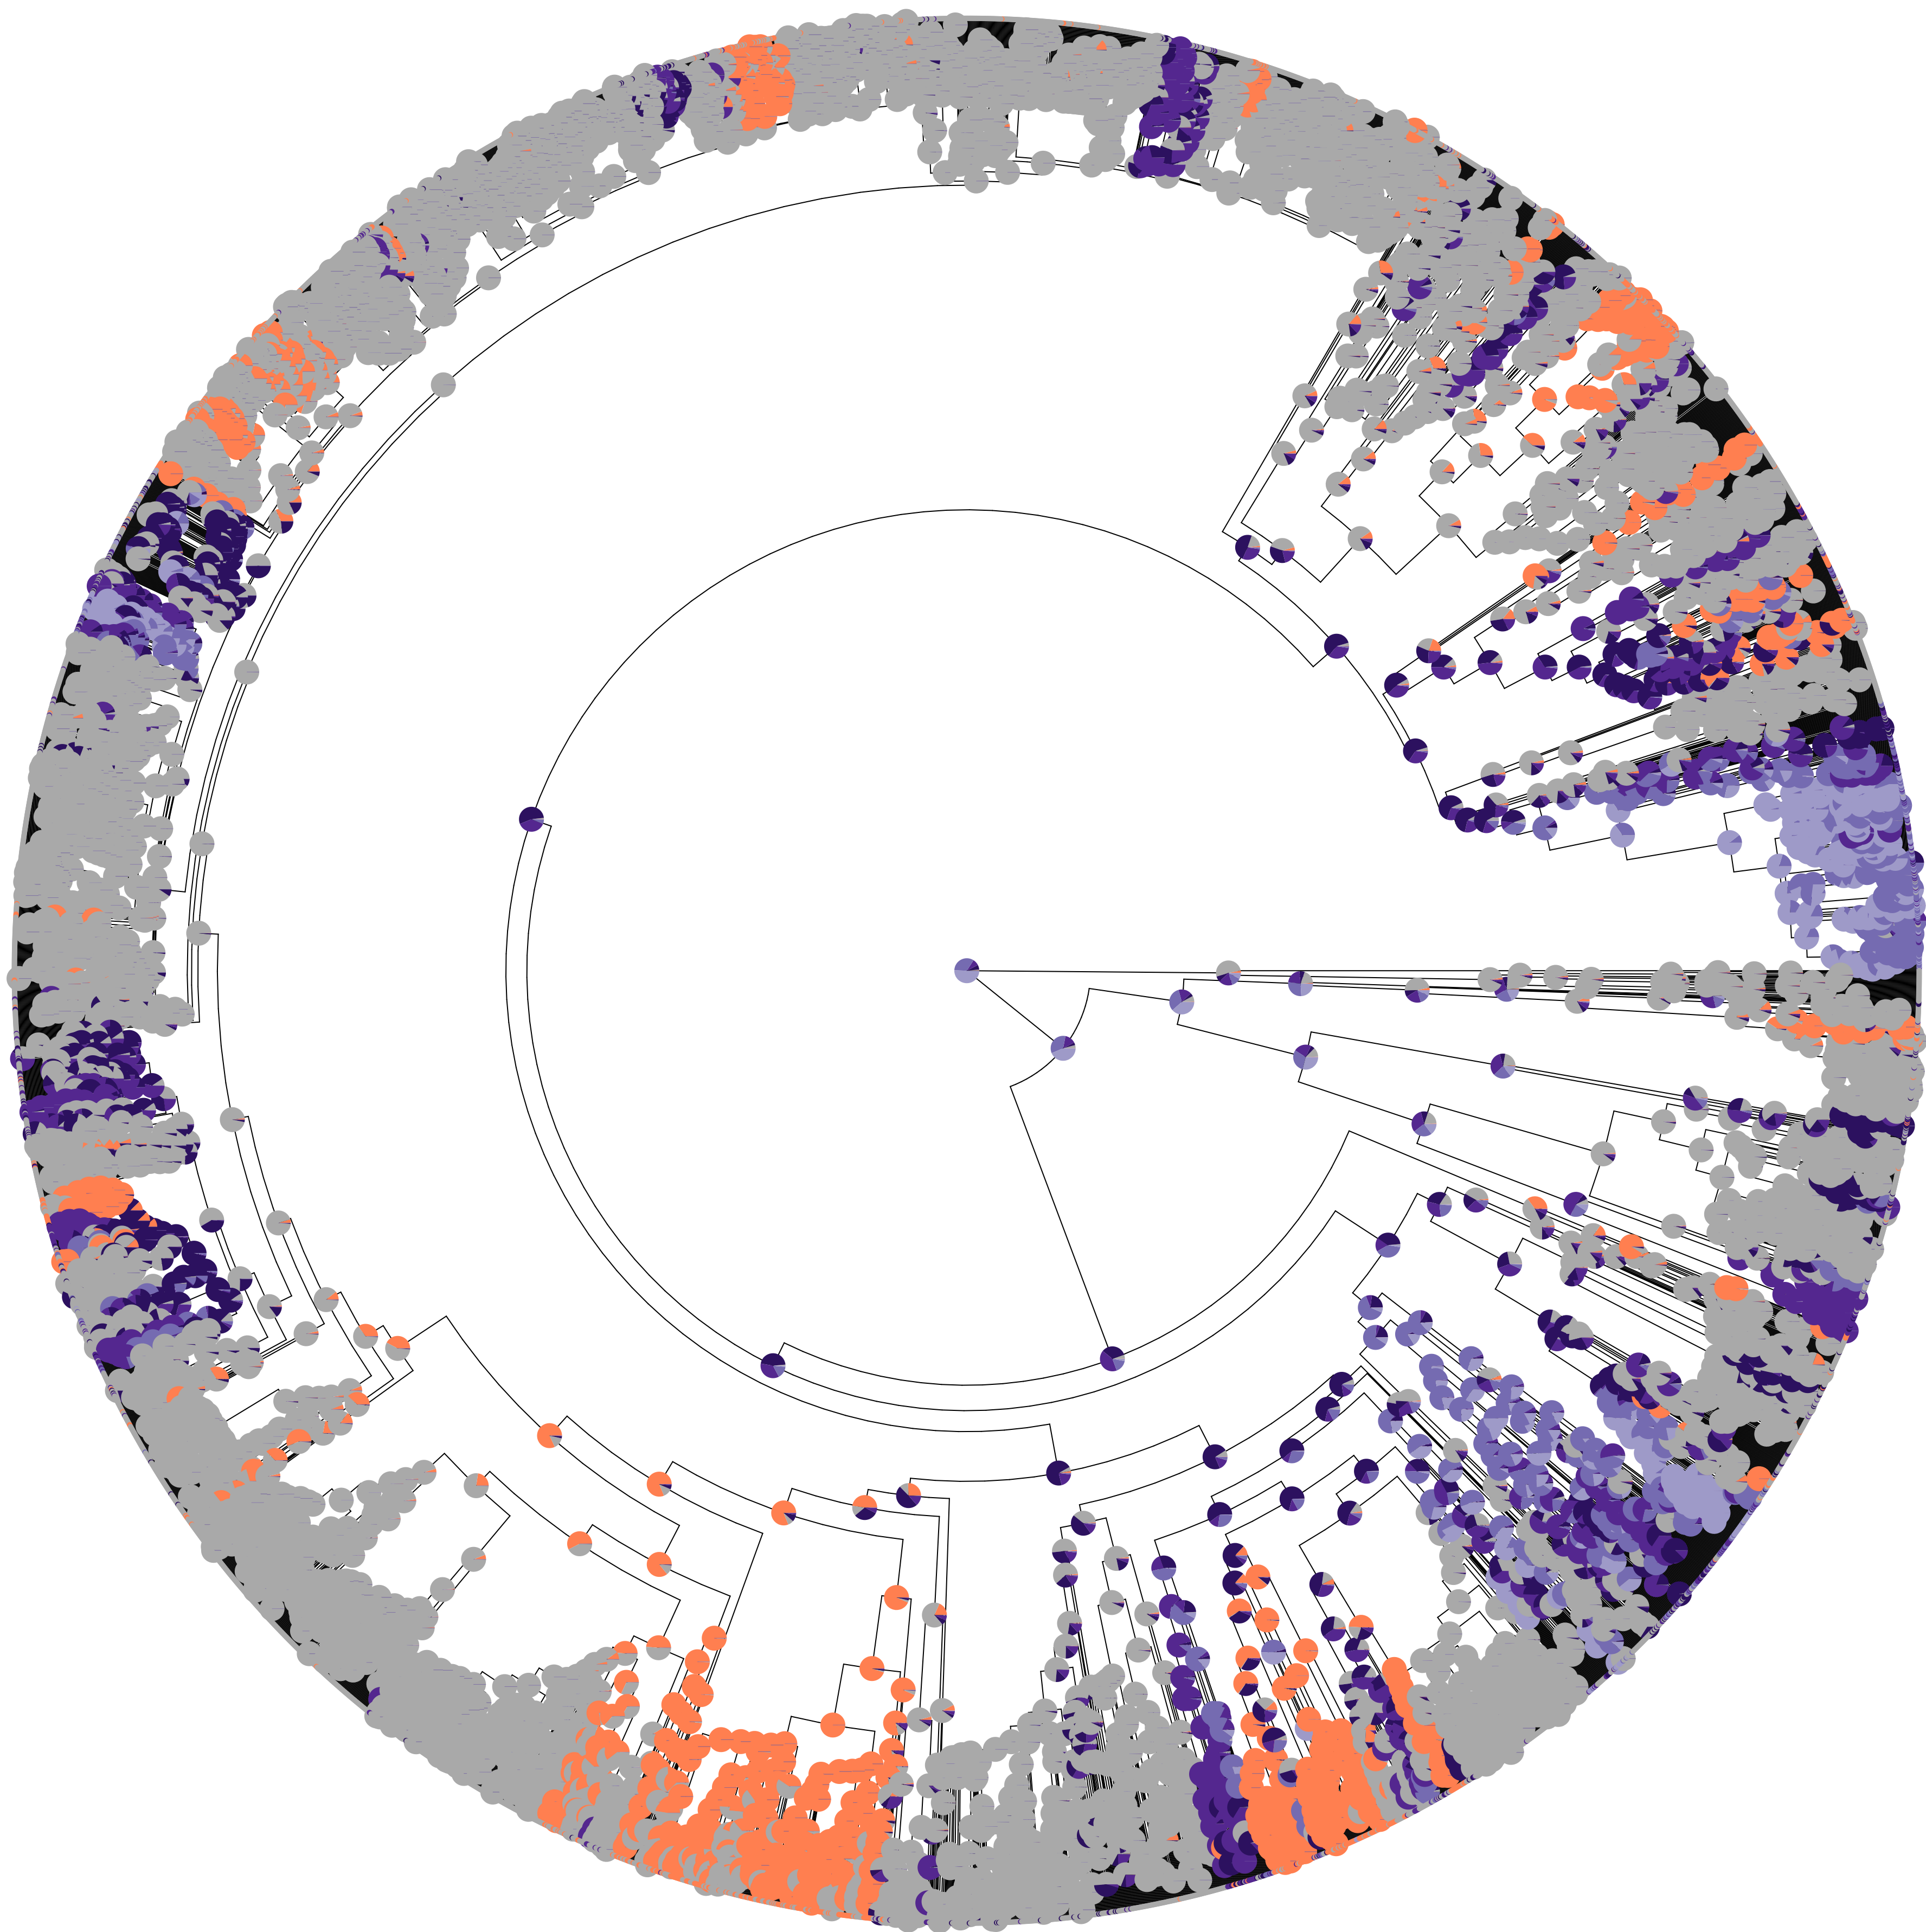

Supplement: Supplementary file 15 [file female_ext_pert_tail.pdf › supp_3/female_ext_pert_tail.pdf]

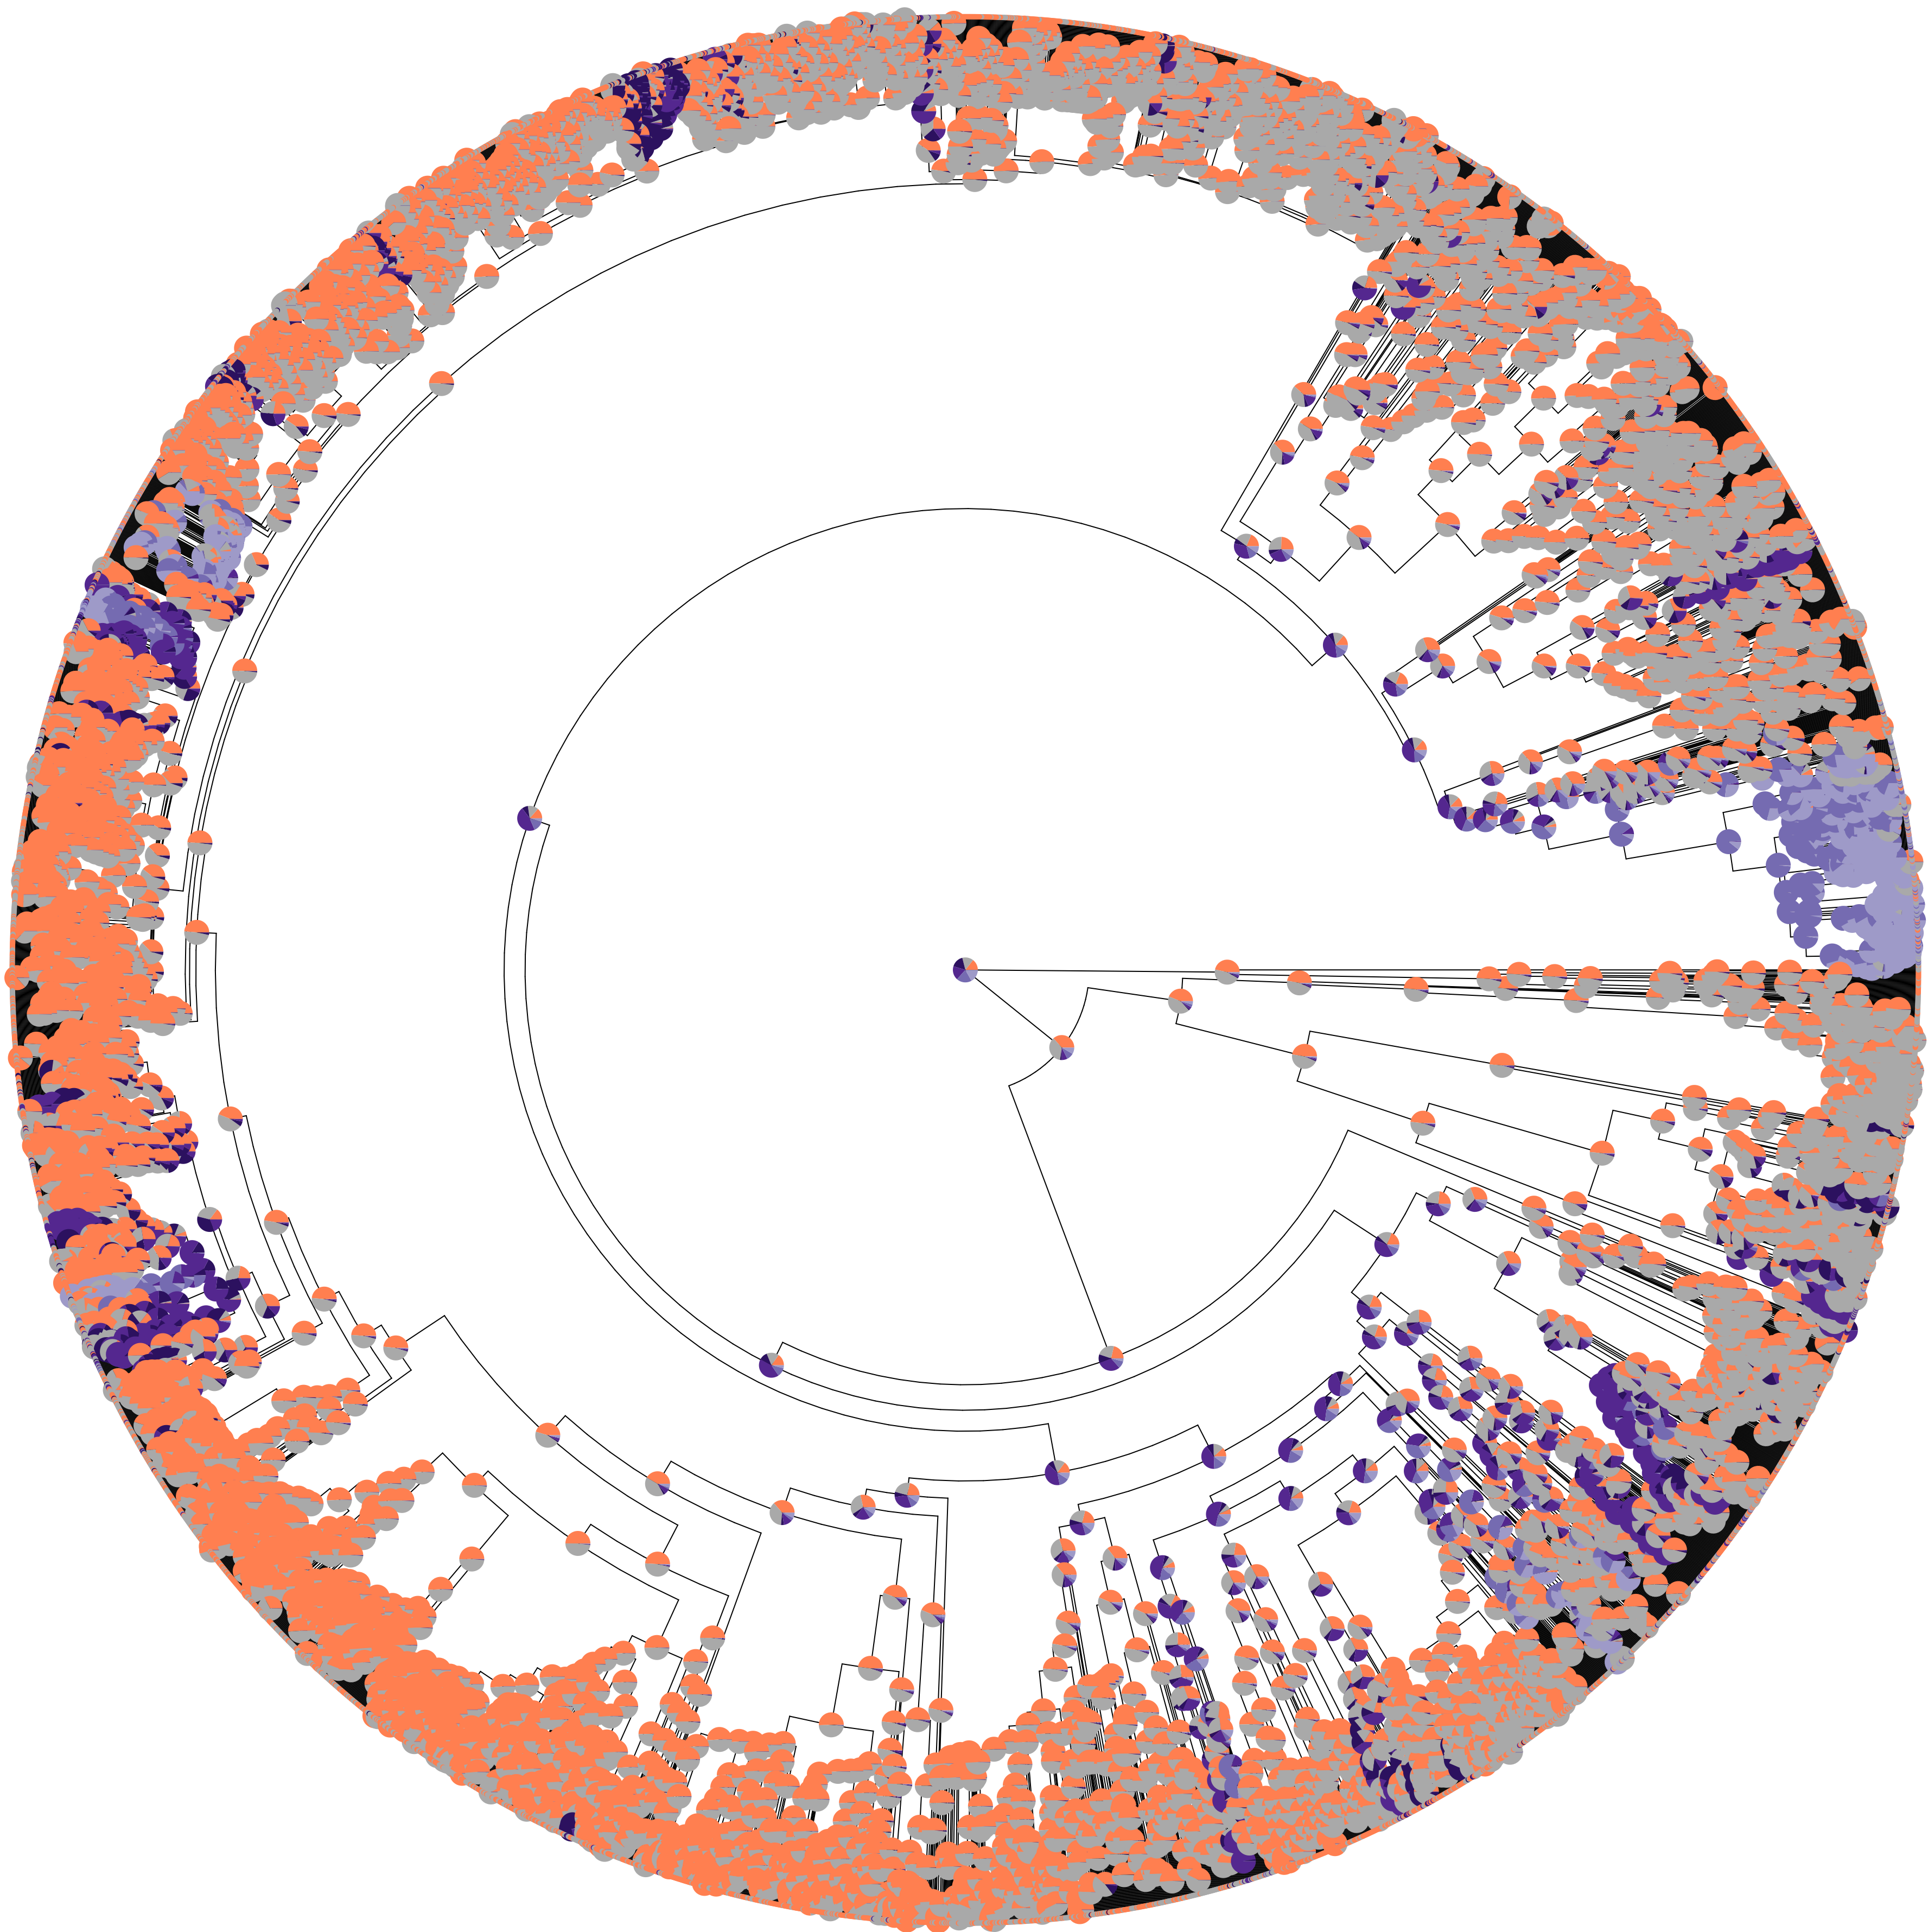

Supplement: Supplementary file 16 [file female_ext_pert_throat.pdf › supp_3/female_ext_pert_throat.pdf]

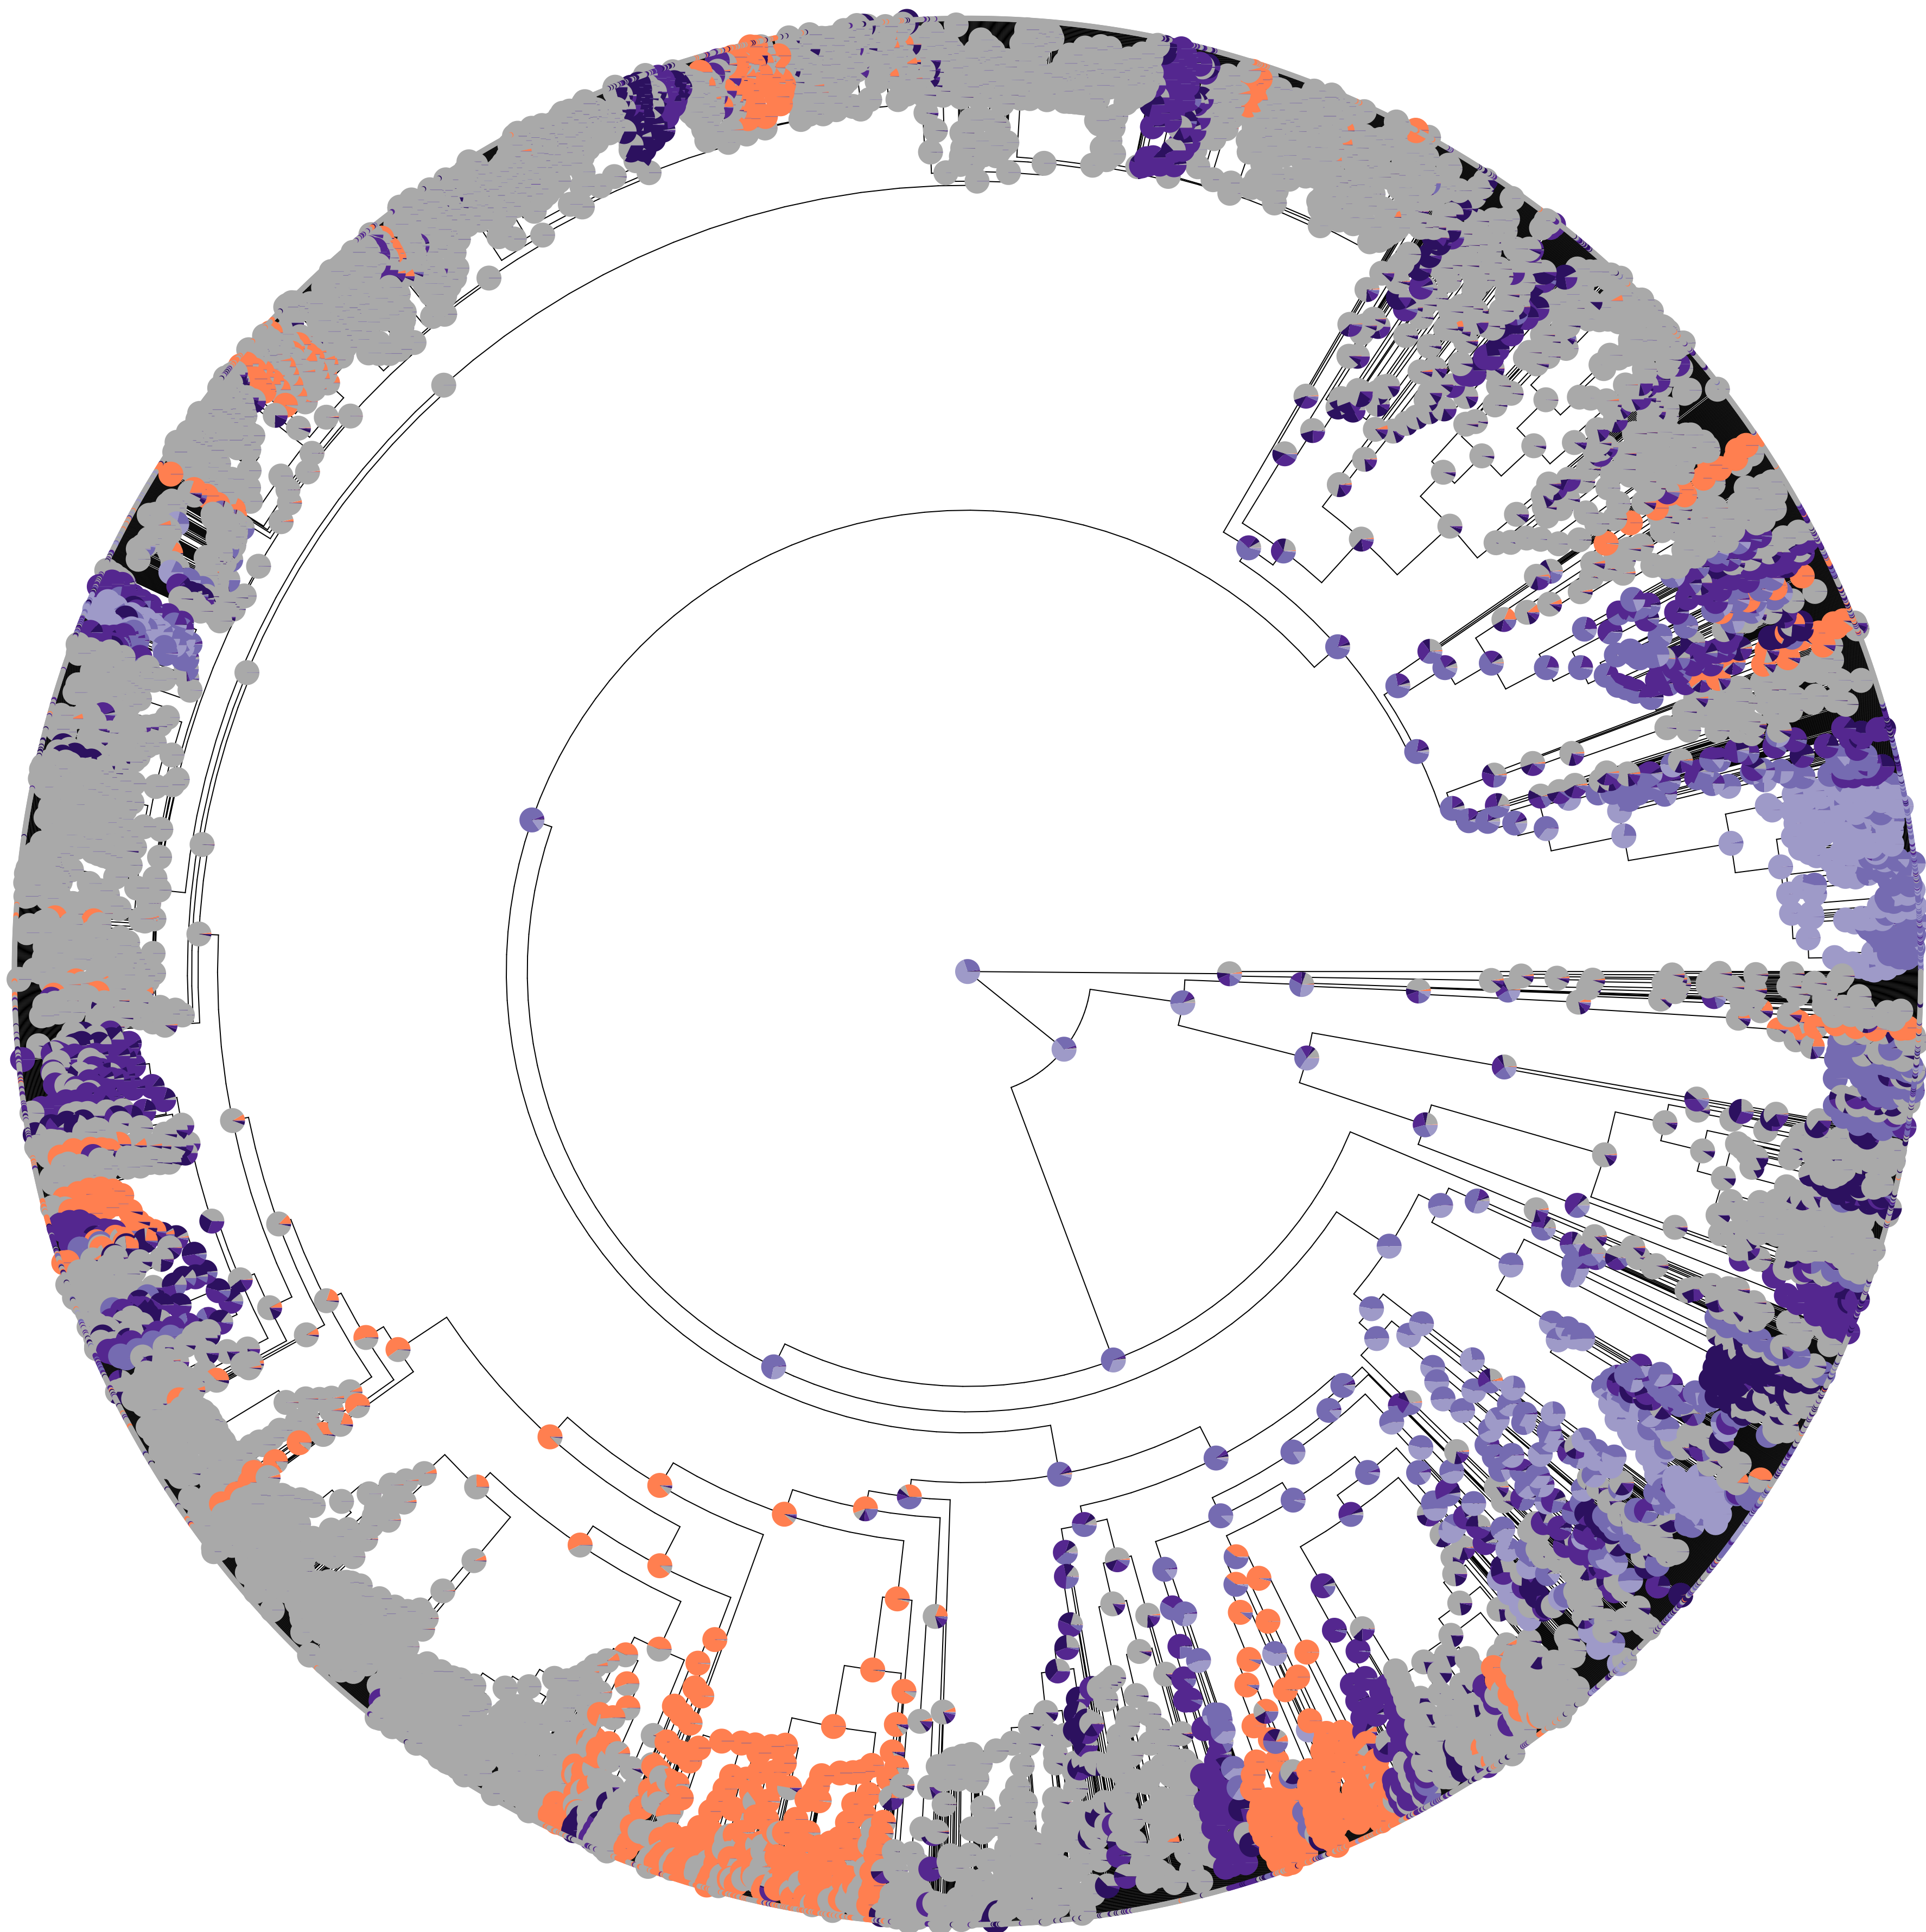

Supplement: Supplementary file 17 [file female_ext_pert_wings.pdf › supp_3/female_ext_pert_wings.pdf]

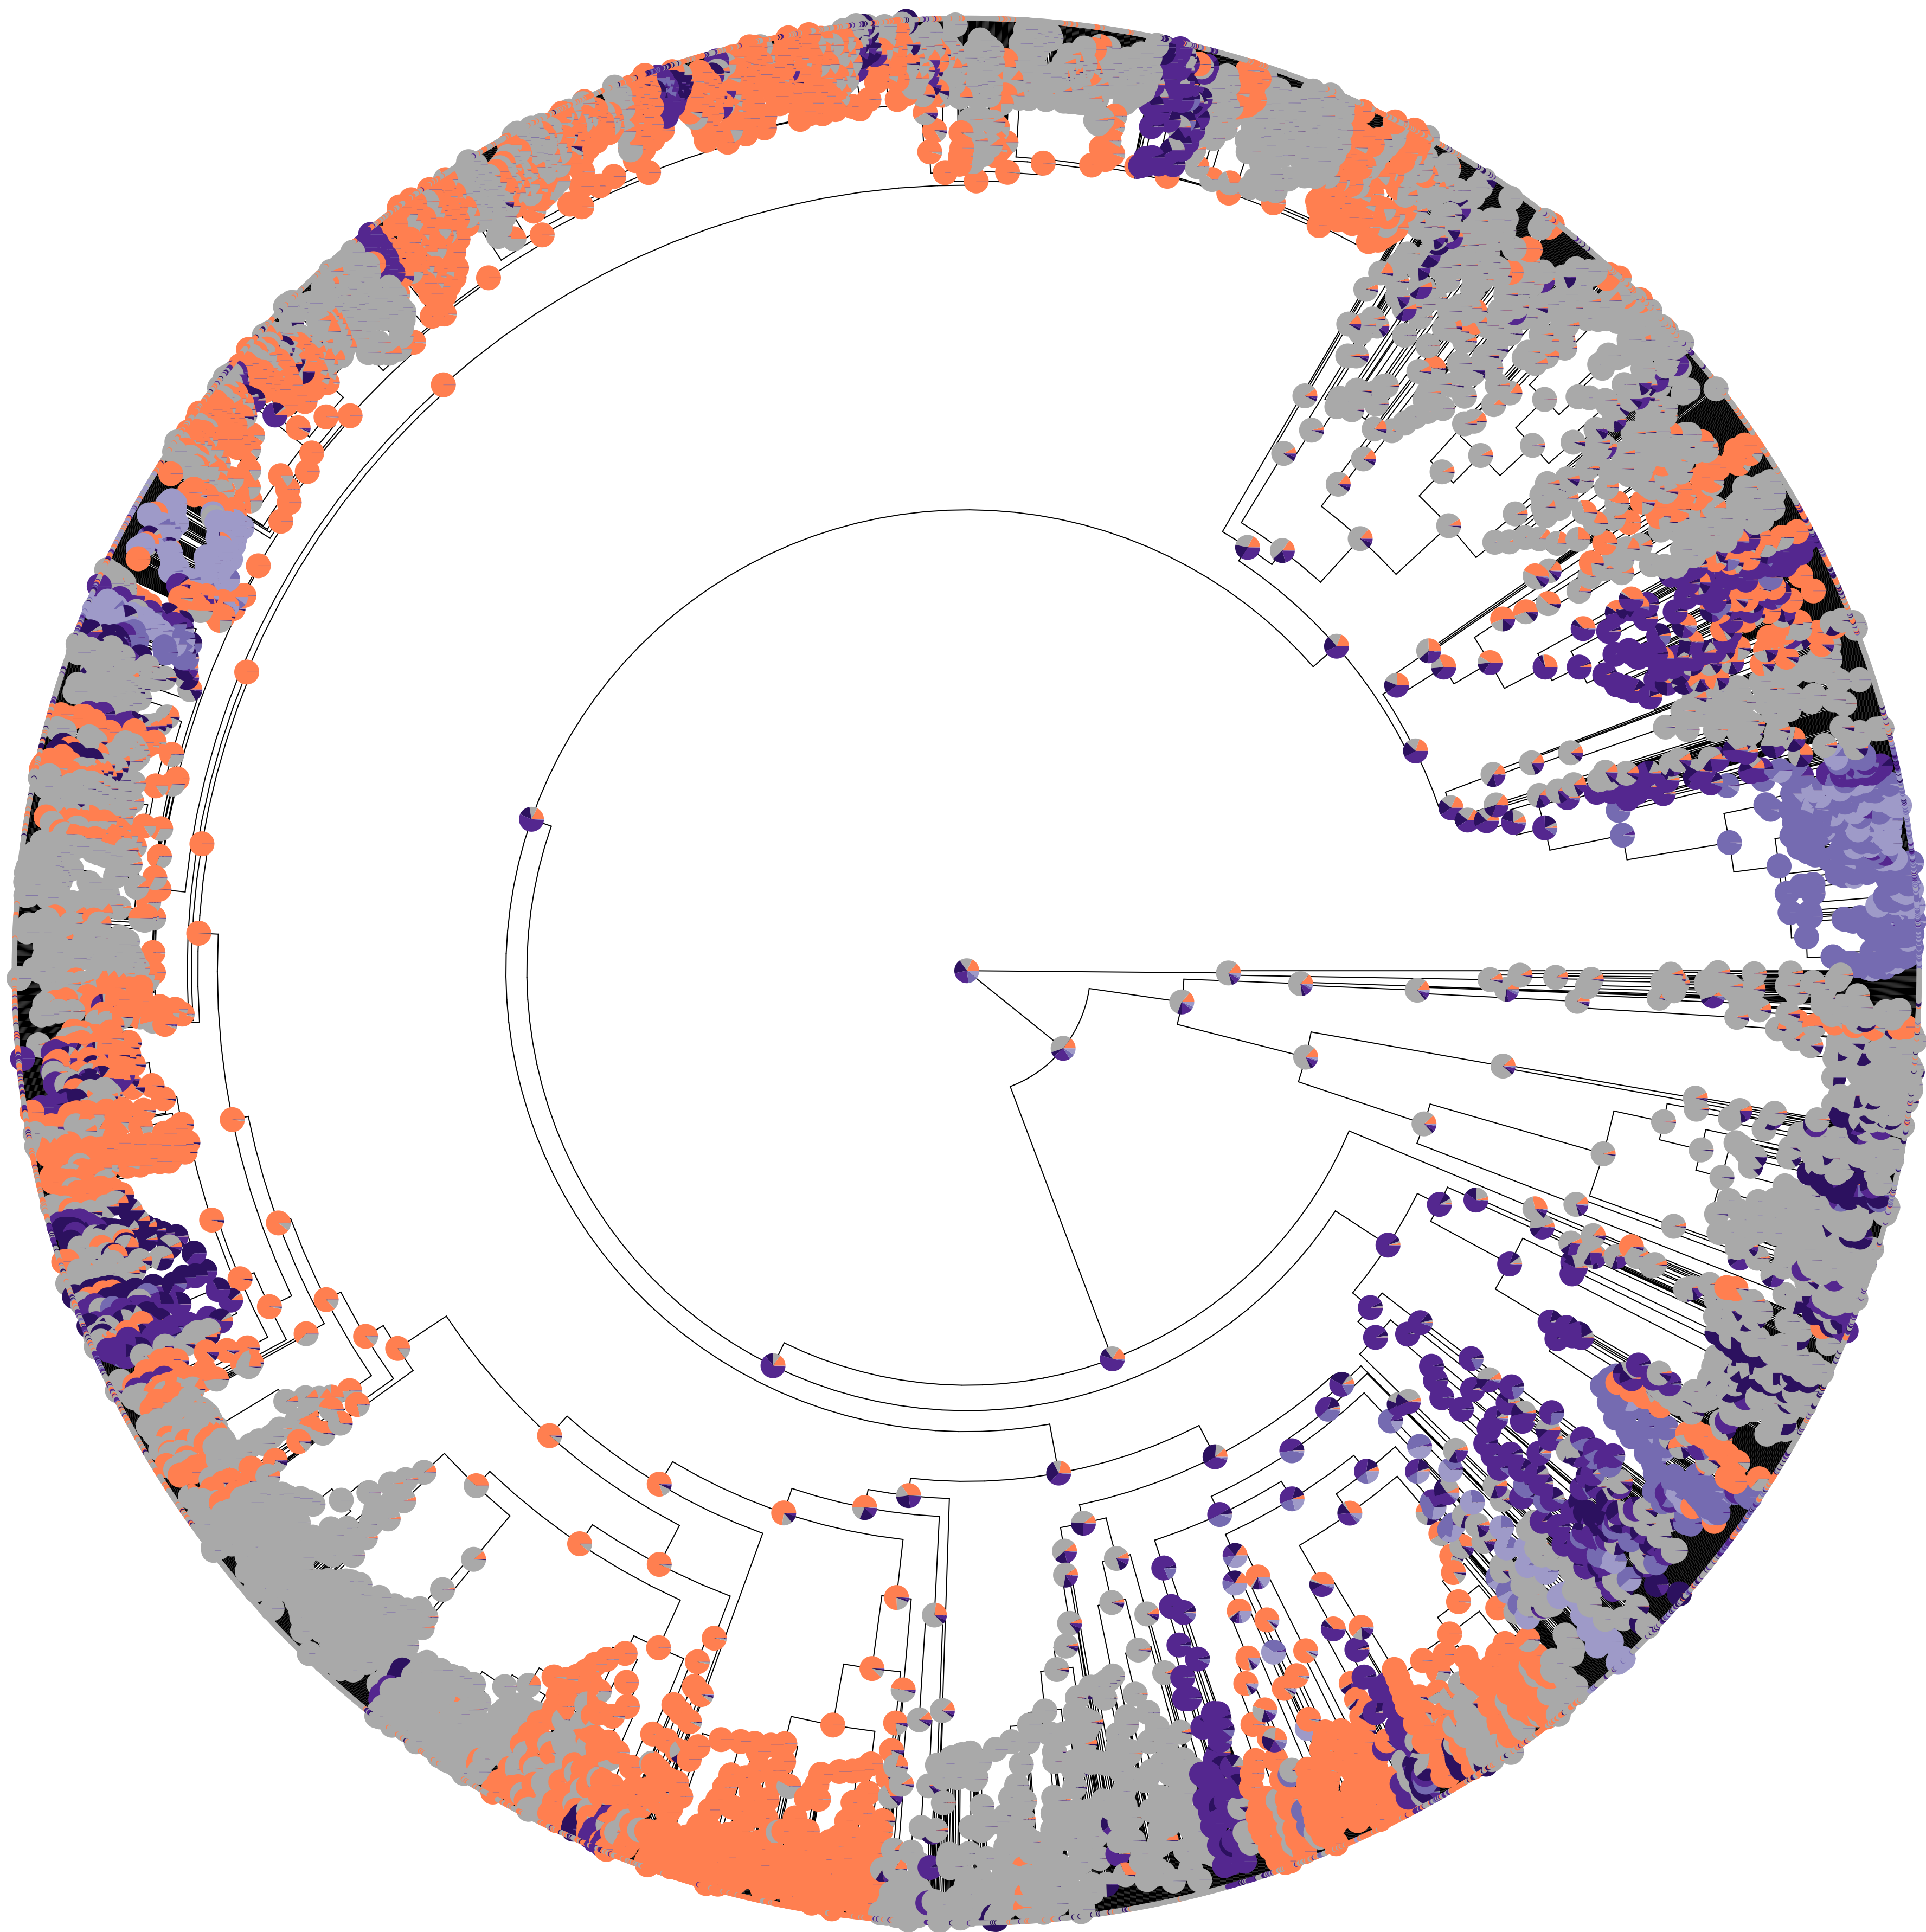

Supplement: Supplementary file 18 [file female_ext_rump.pdf › supp_3/female_ext_rump.pdf]

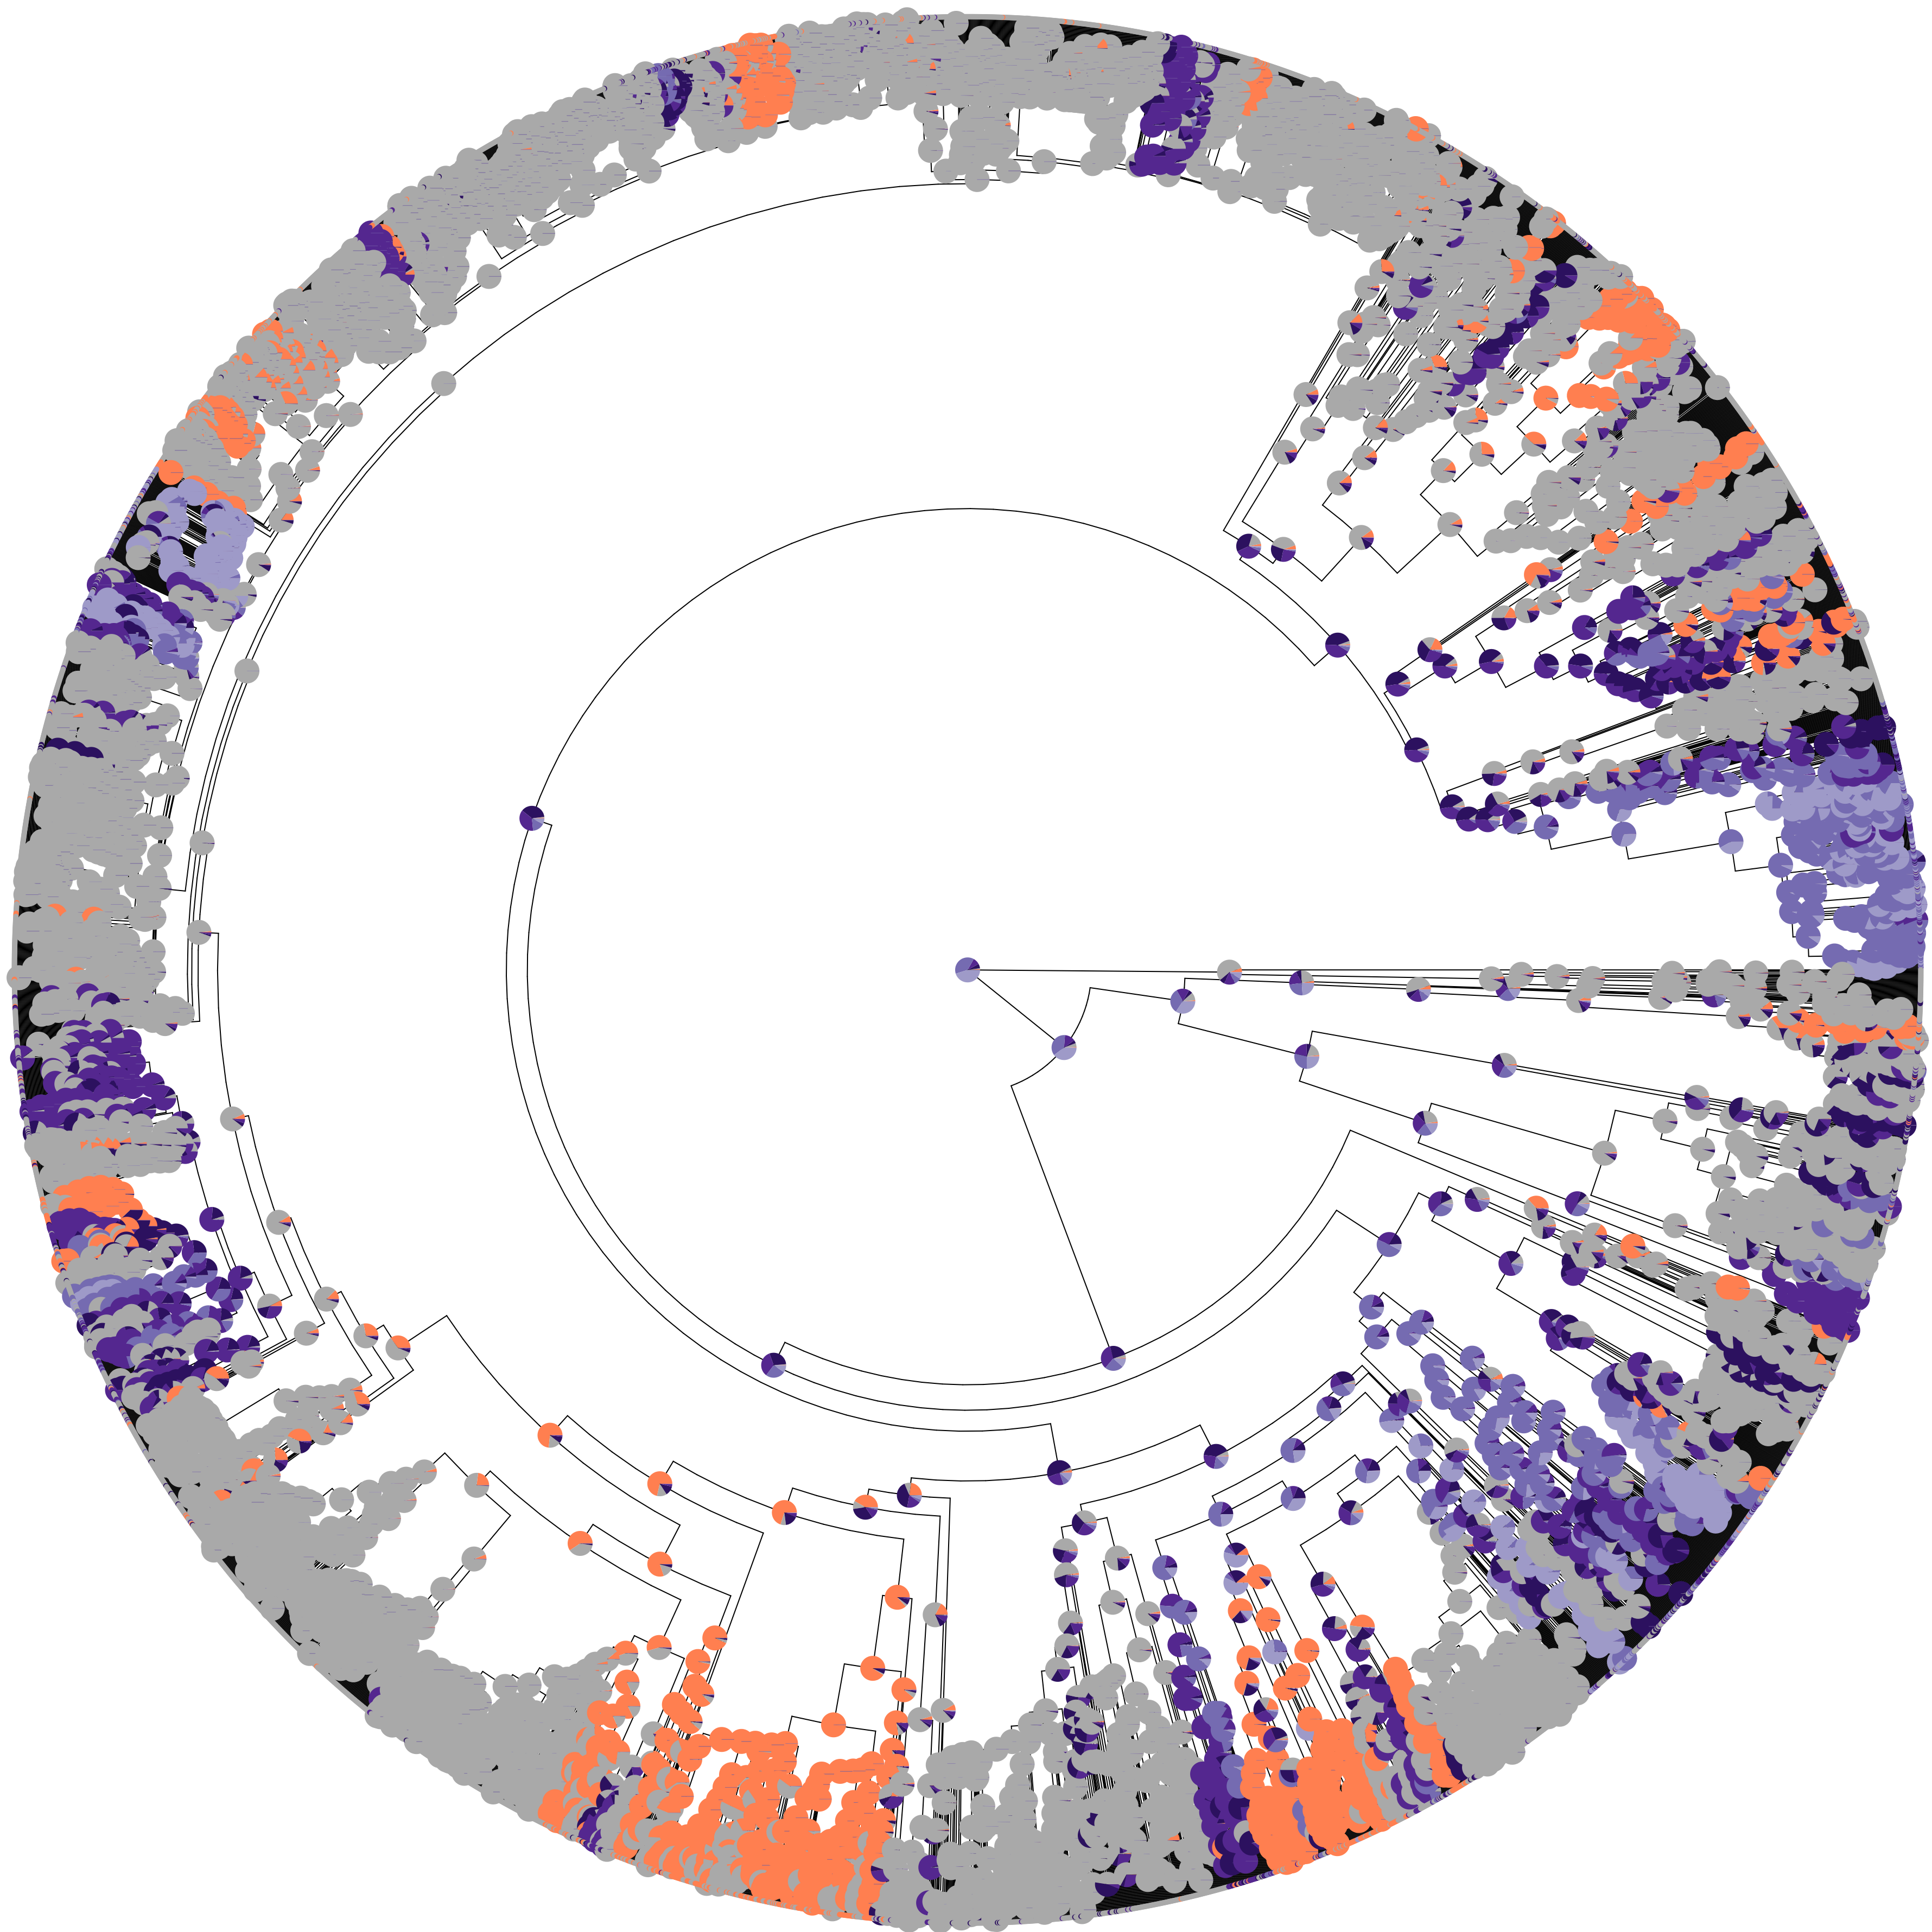

Supplement: Supplementary file 19 [file female_ext_tail.pdf › supp_3/female_ext_tail.pdf]

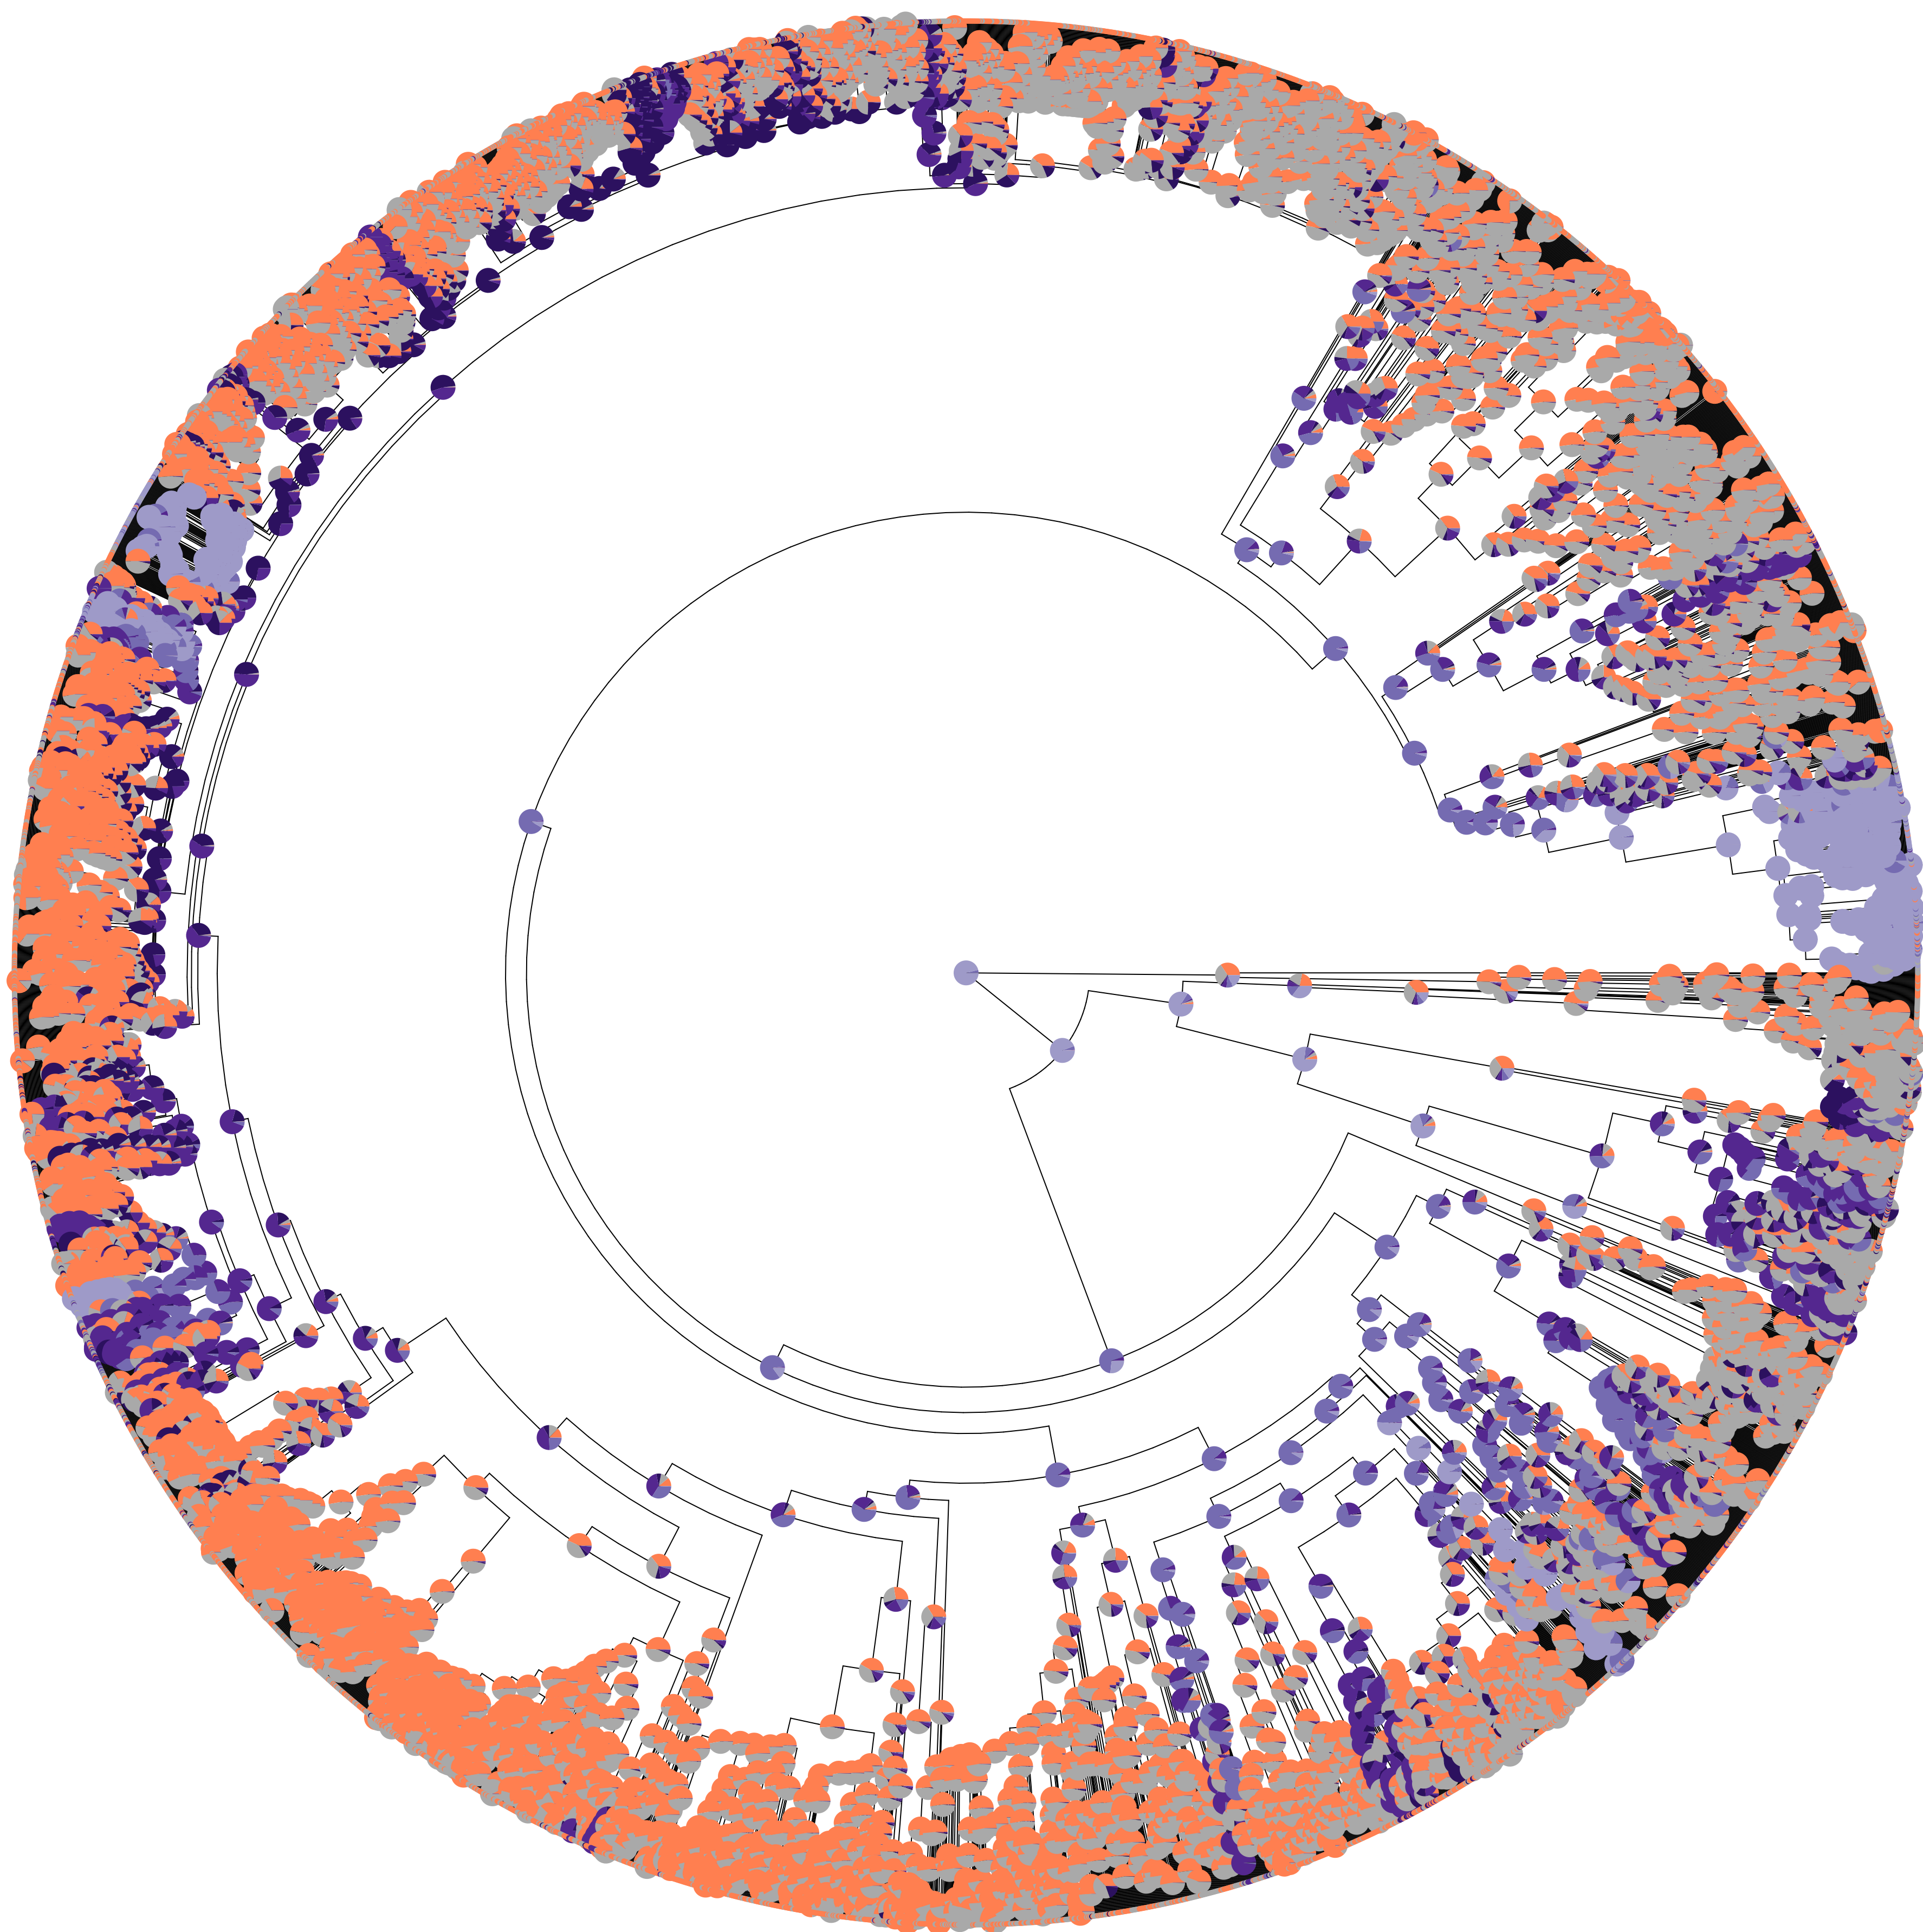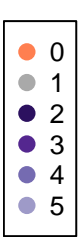

Supplement: Supplementary file 20 [file female_ext_throat.pdf › supp_3/female_ext_throat.pdf]

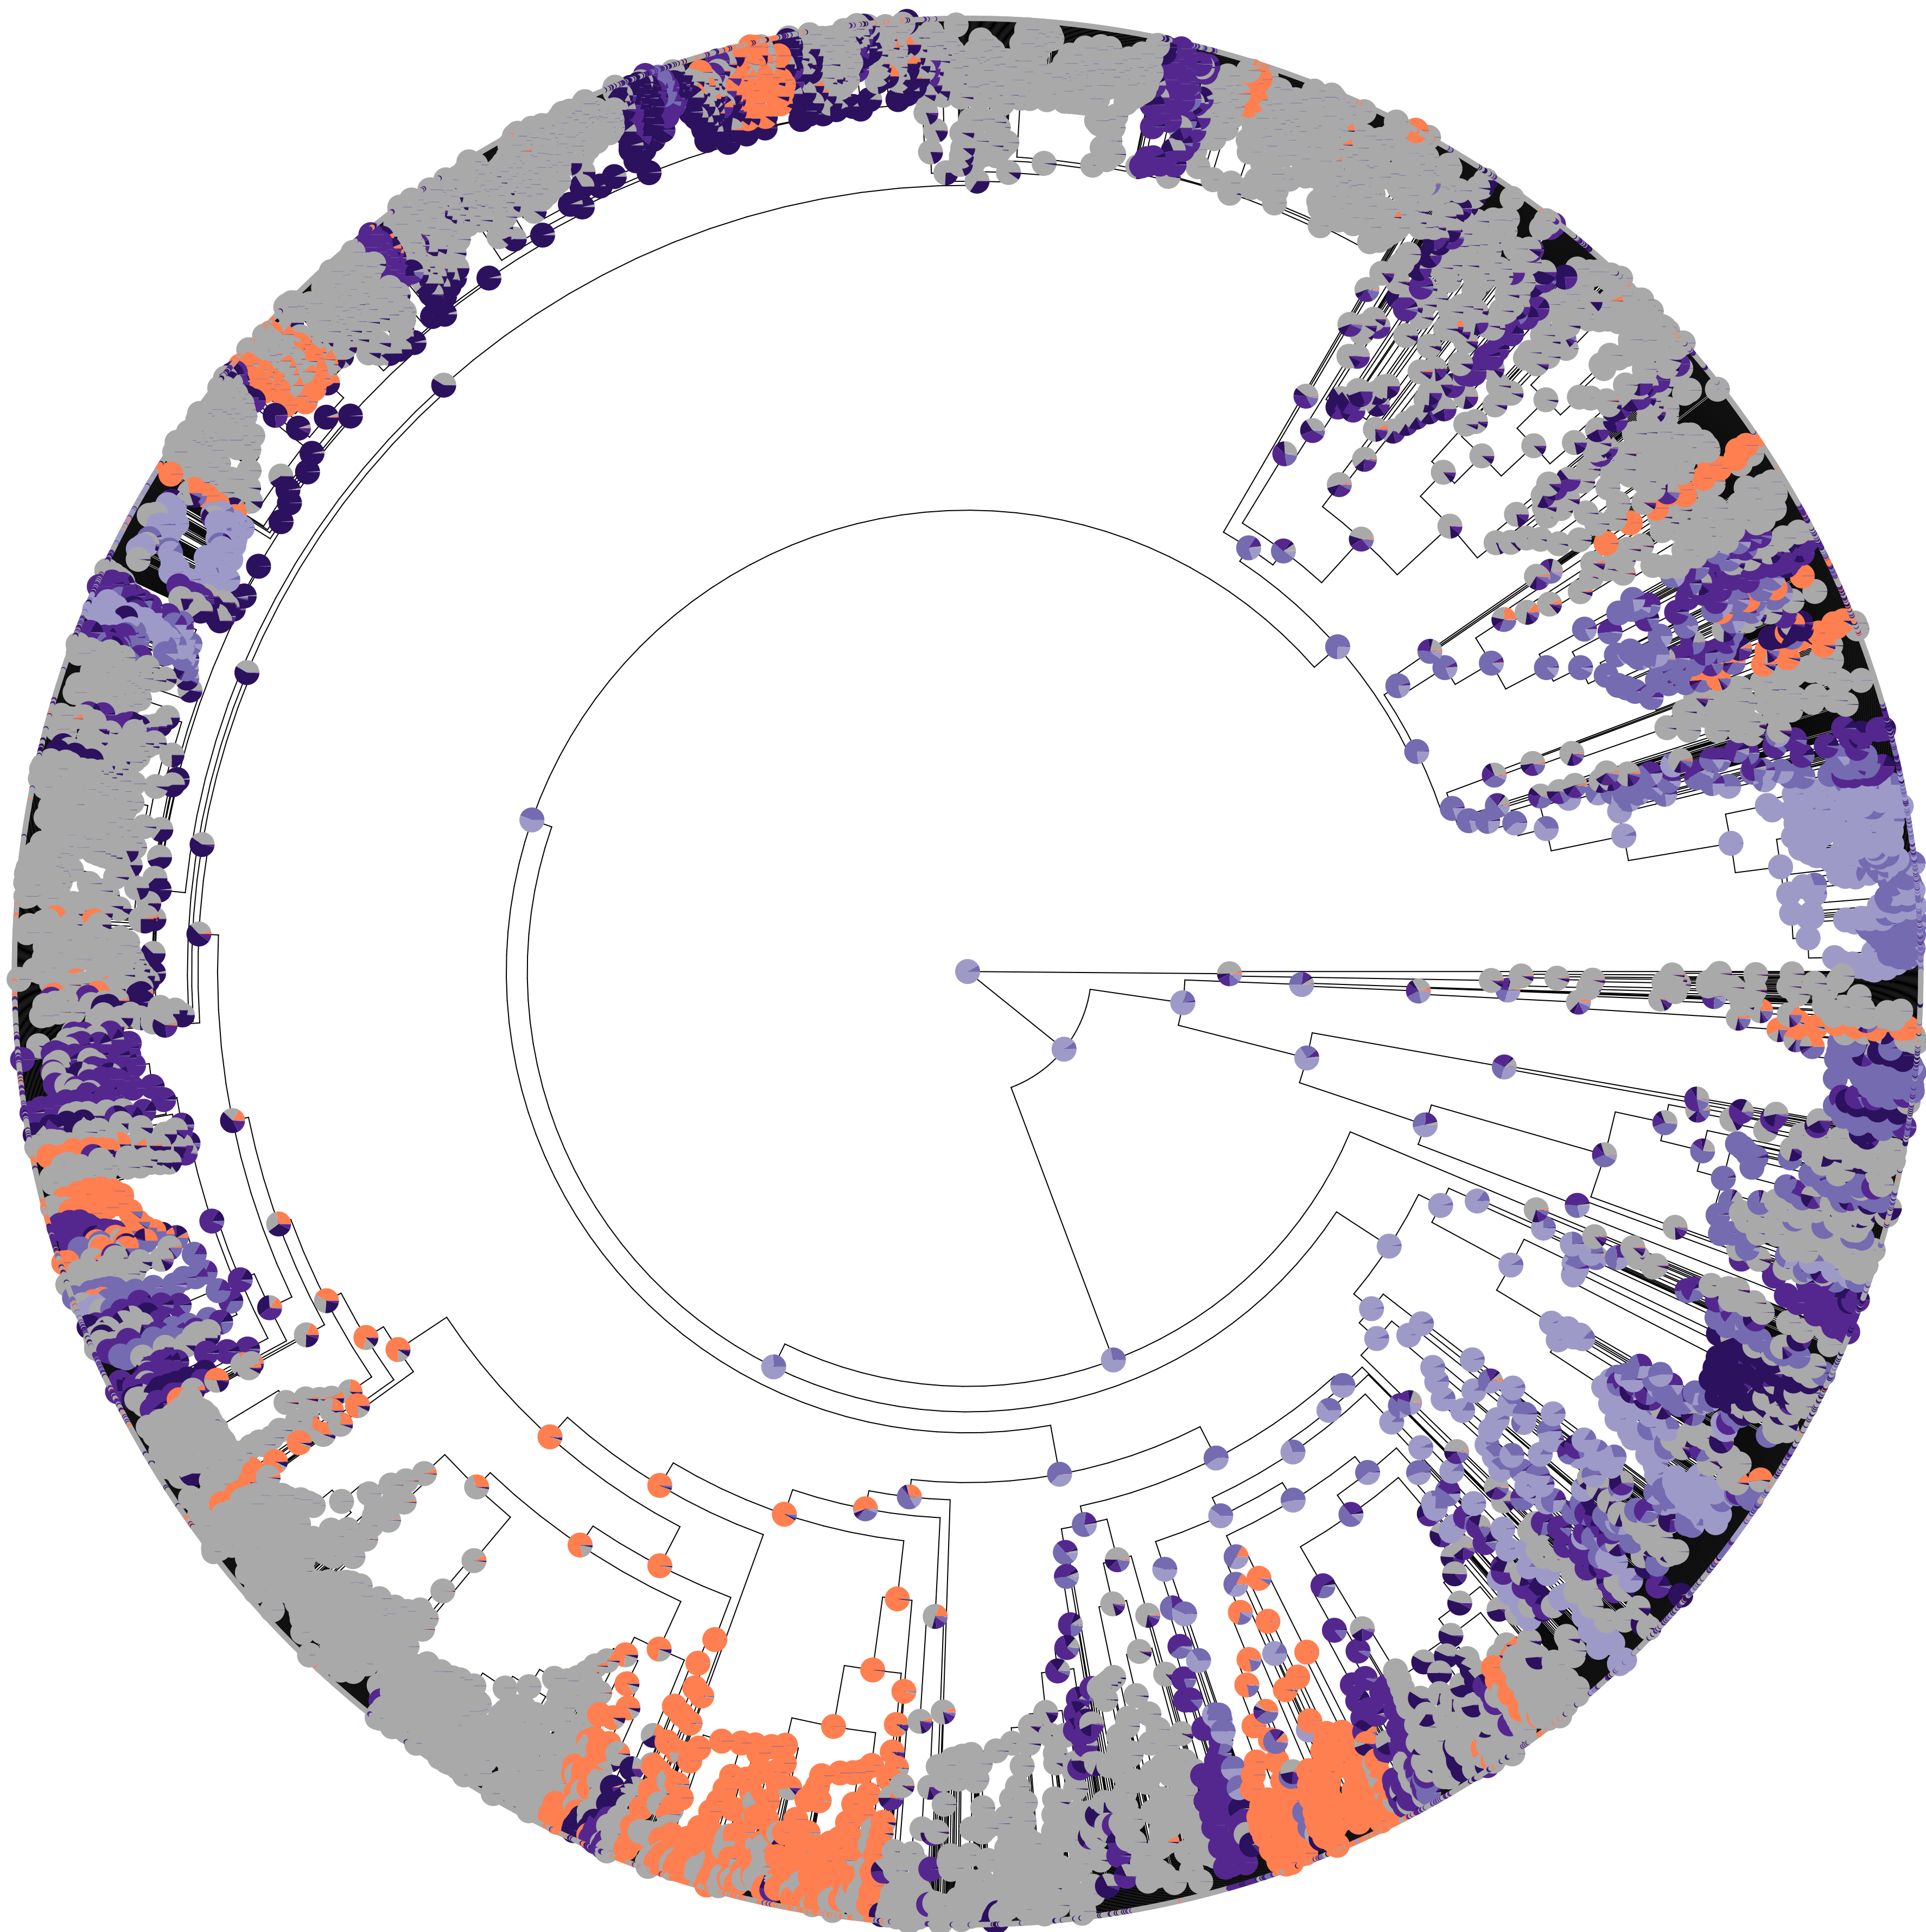

Supplement: Supplementary file 21 [file female_ext_wings.pdf › supp_3/female_ext_wings.pdf]

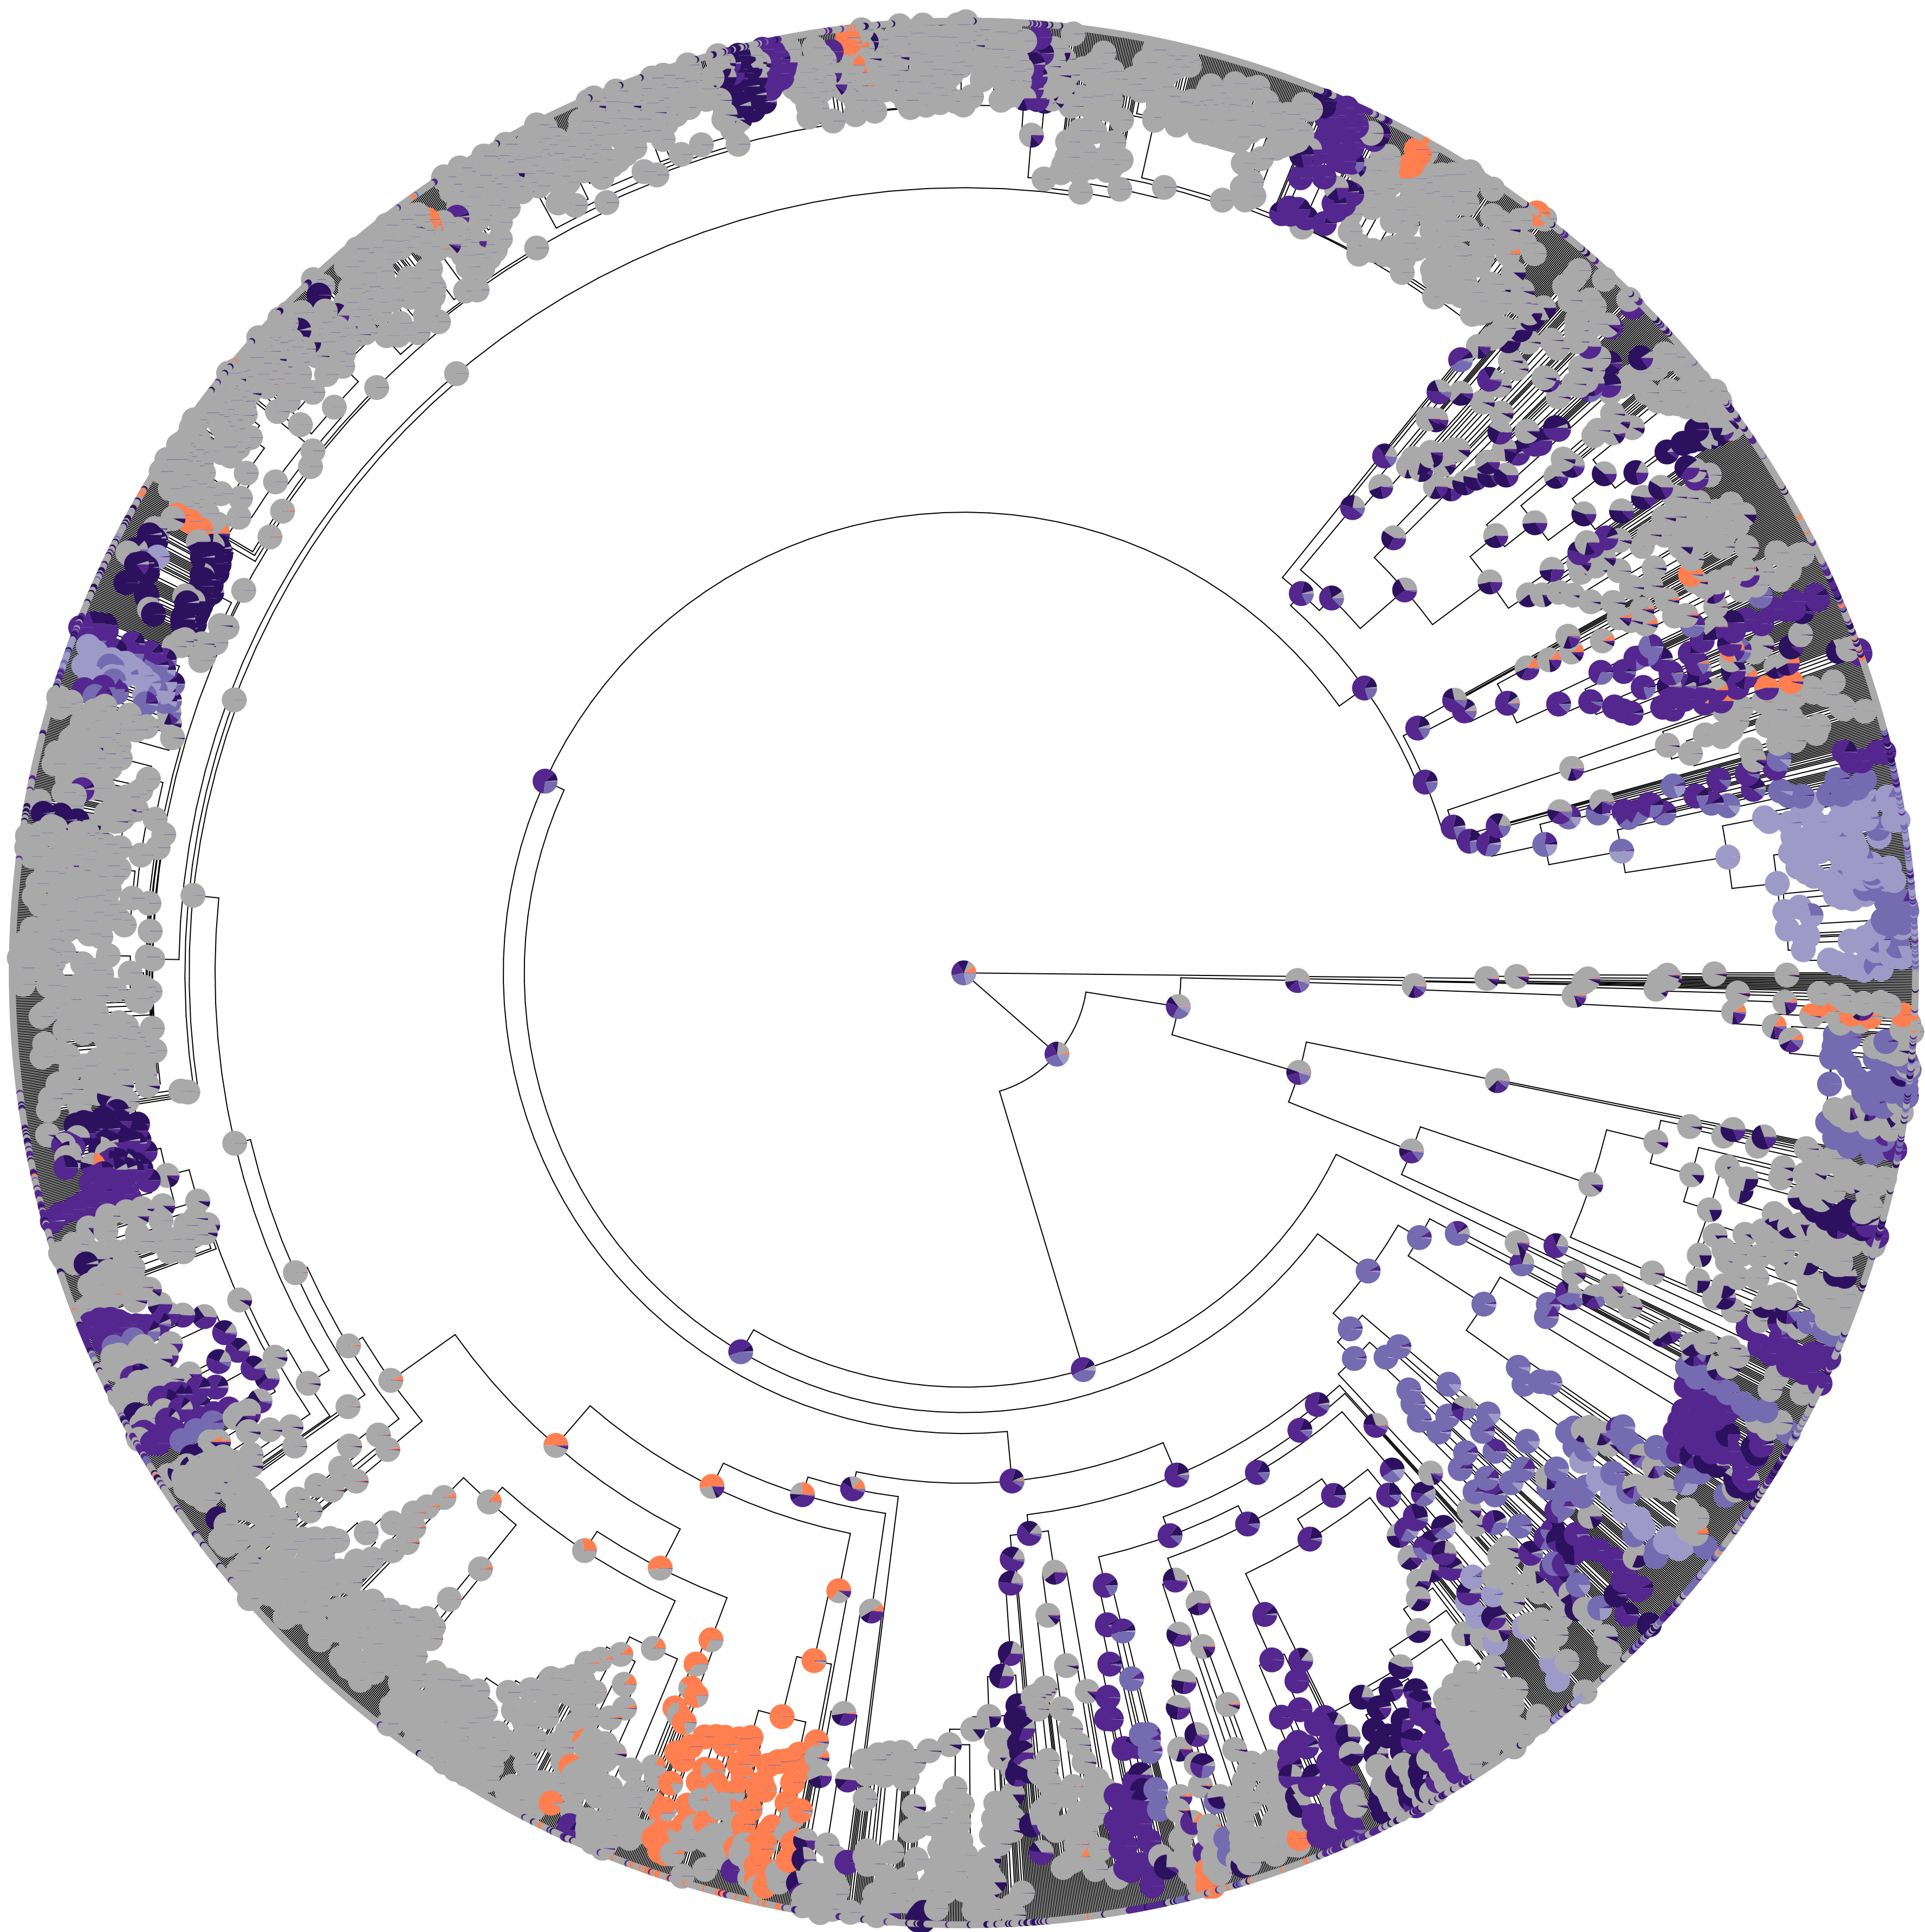

Supplement: Supplementary file 22 [file female_general.pdf › supp_3/female_general.pdf]

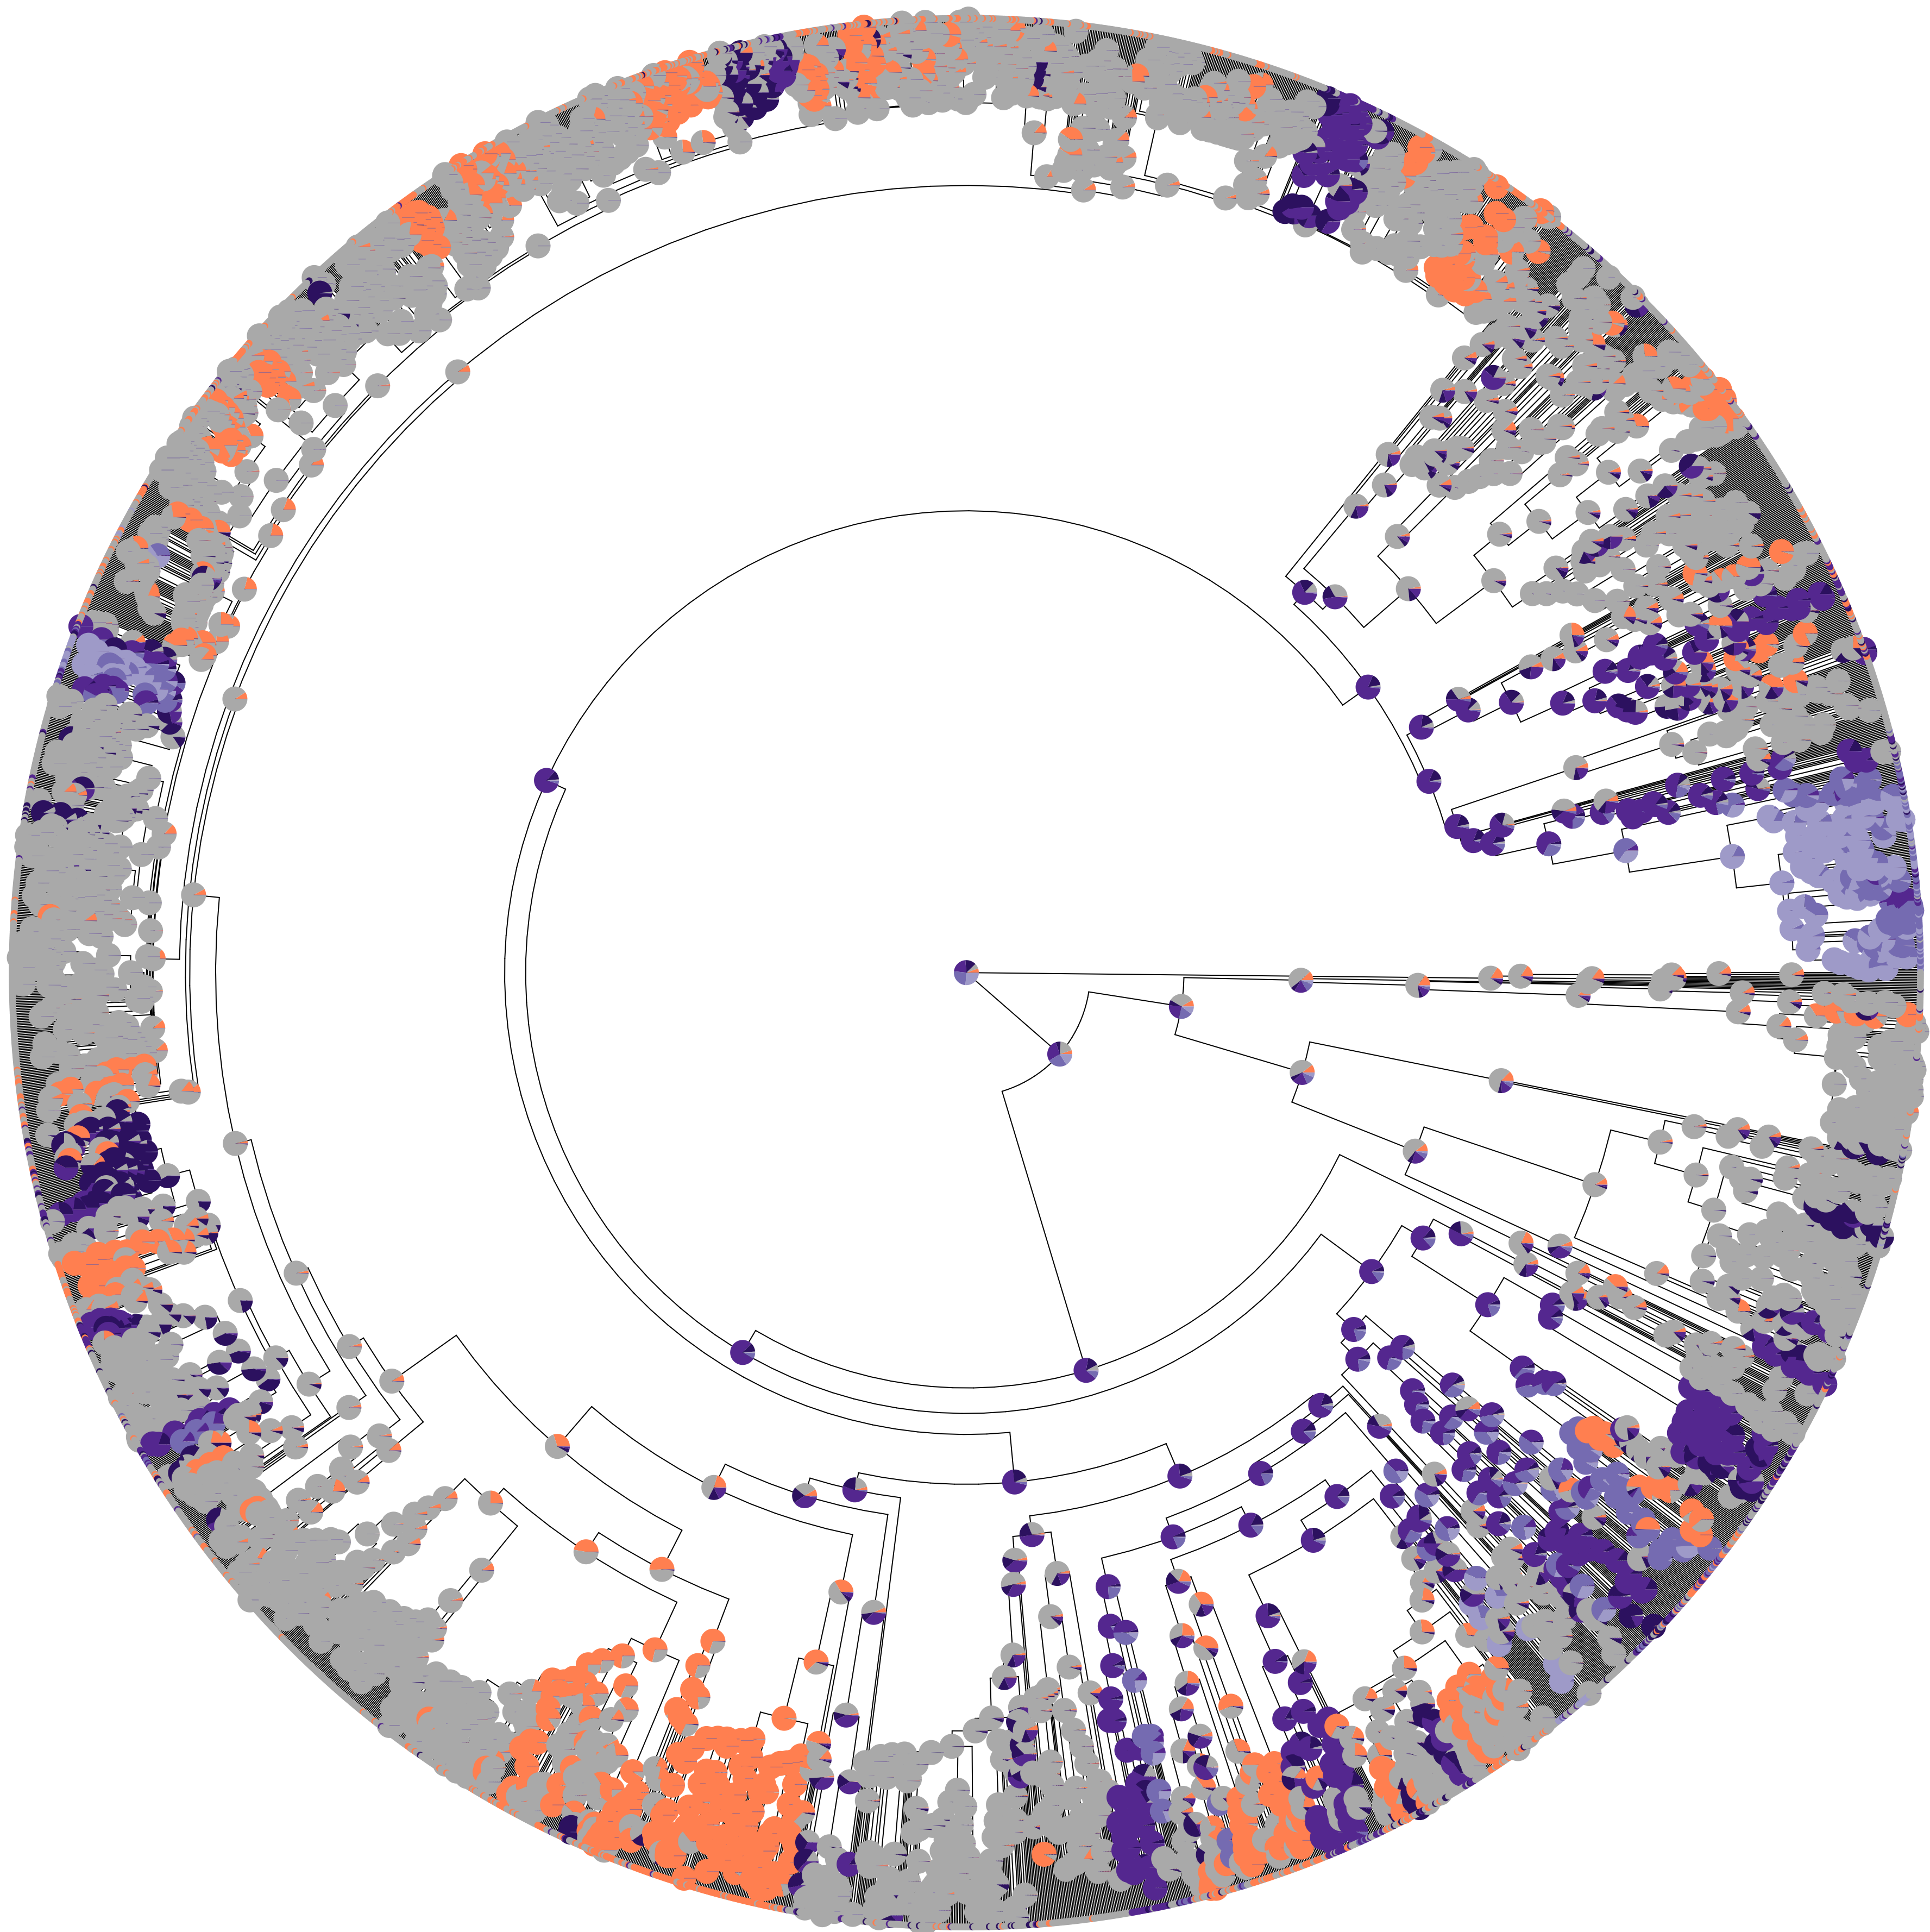

Supplement: Supplementary file 23 [file female_mantle.pdf › supp_3/female_mantle.pdf]



Supplement: Supplementary file 24 [file female_pert_belly.pdf › supp_3/female_pert_belly.pdf]

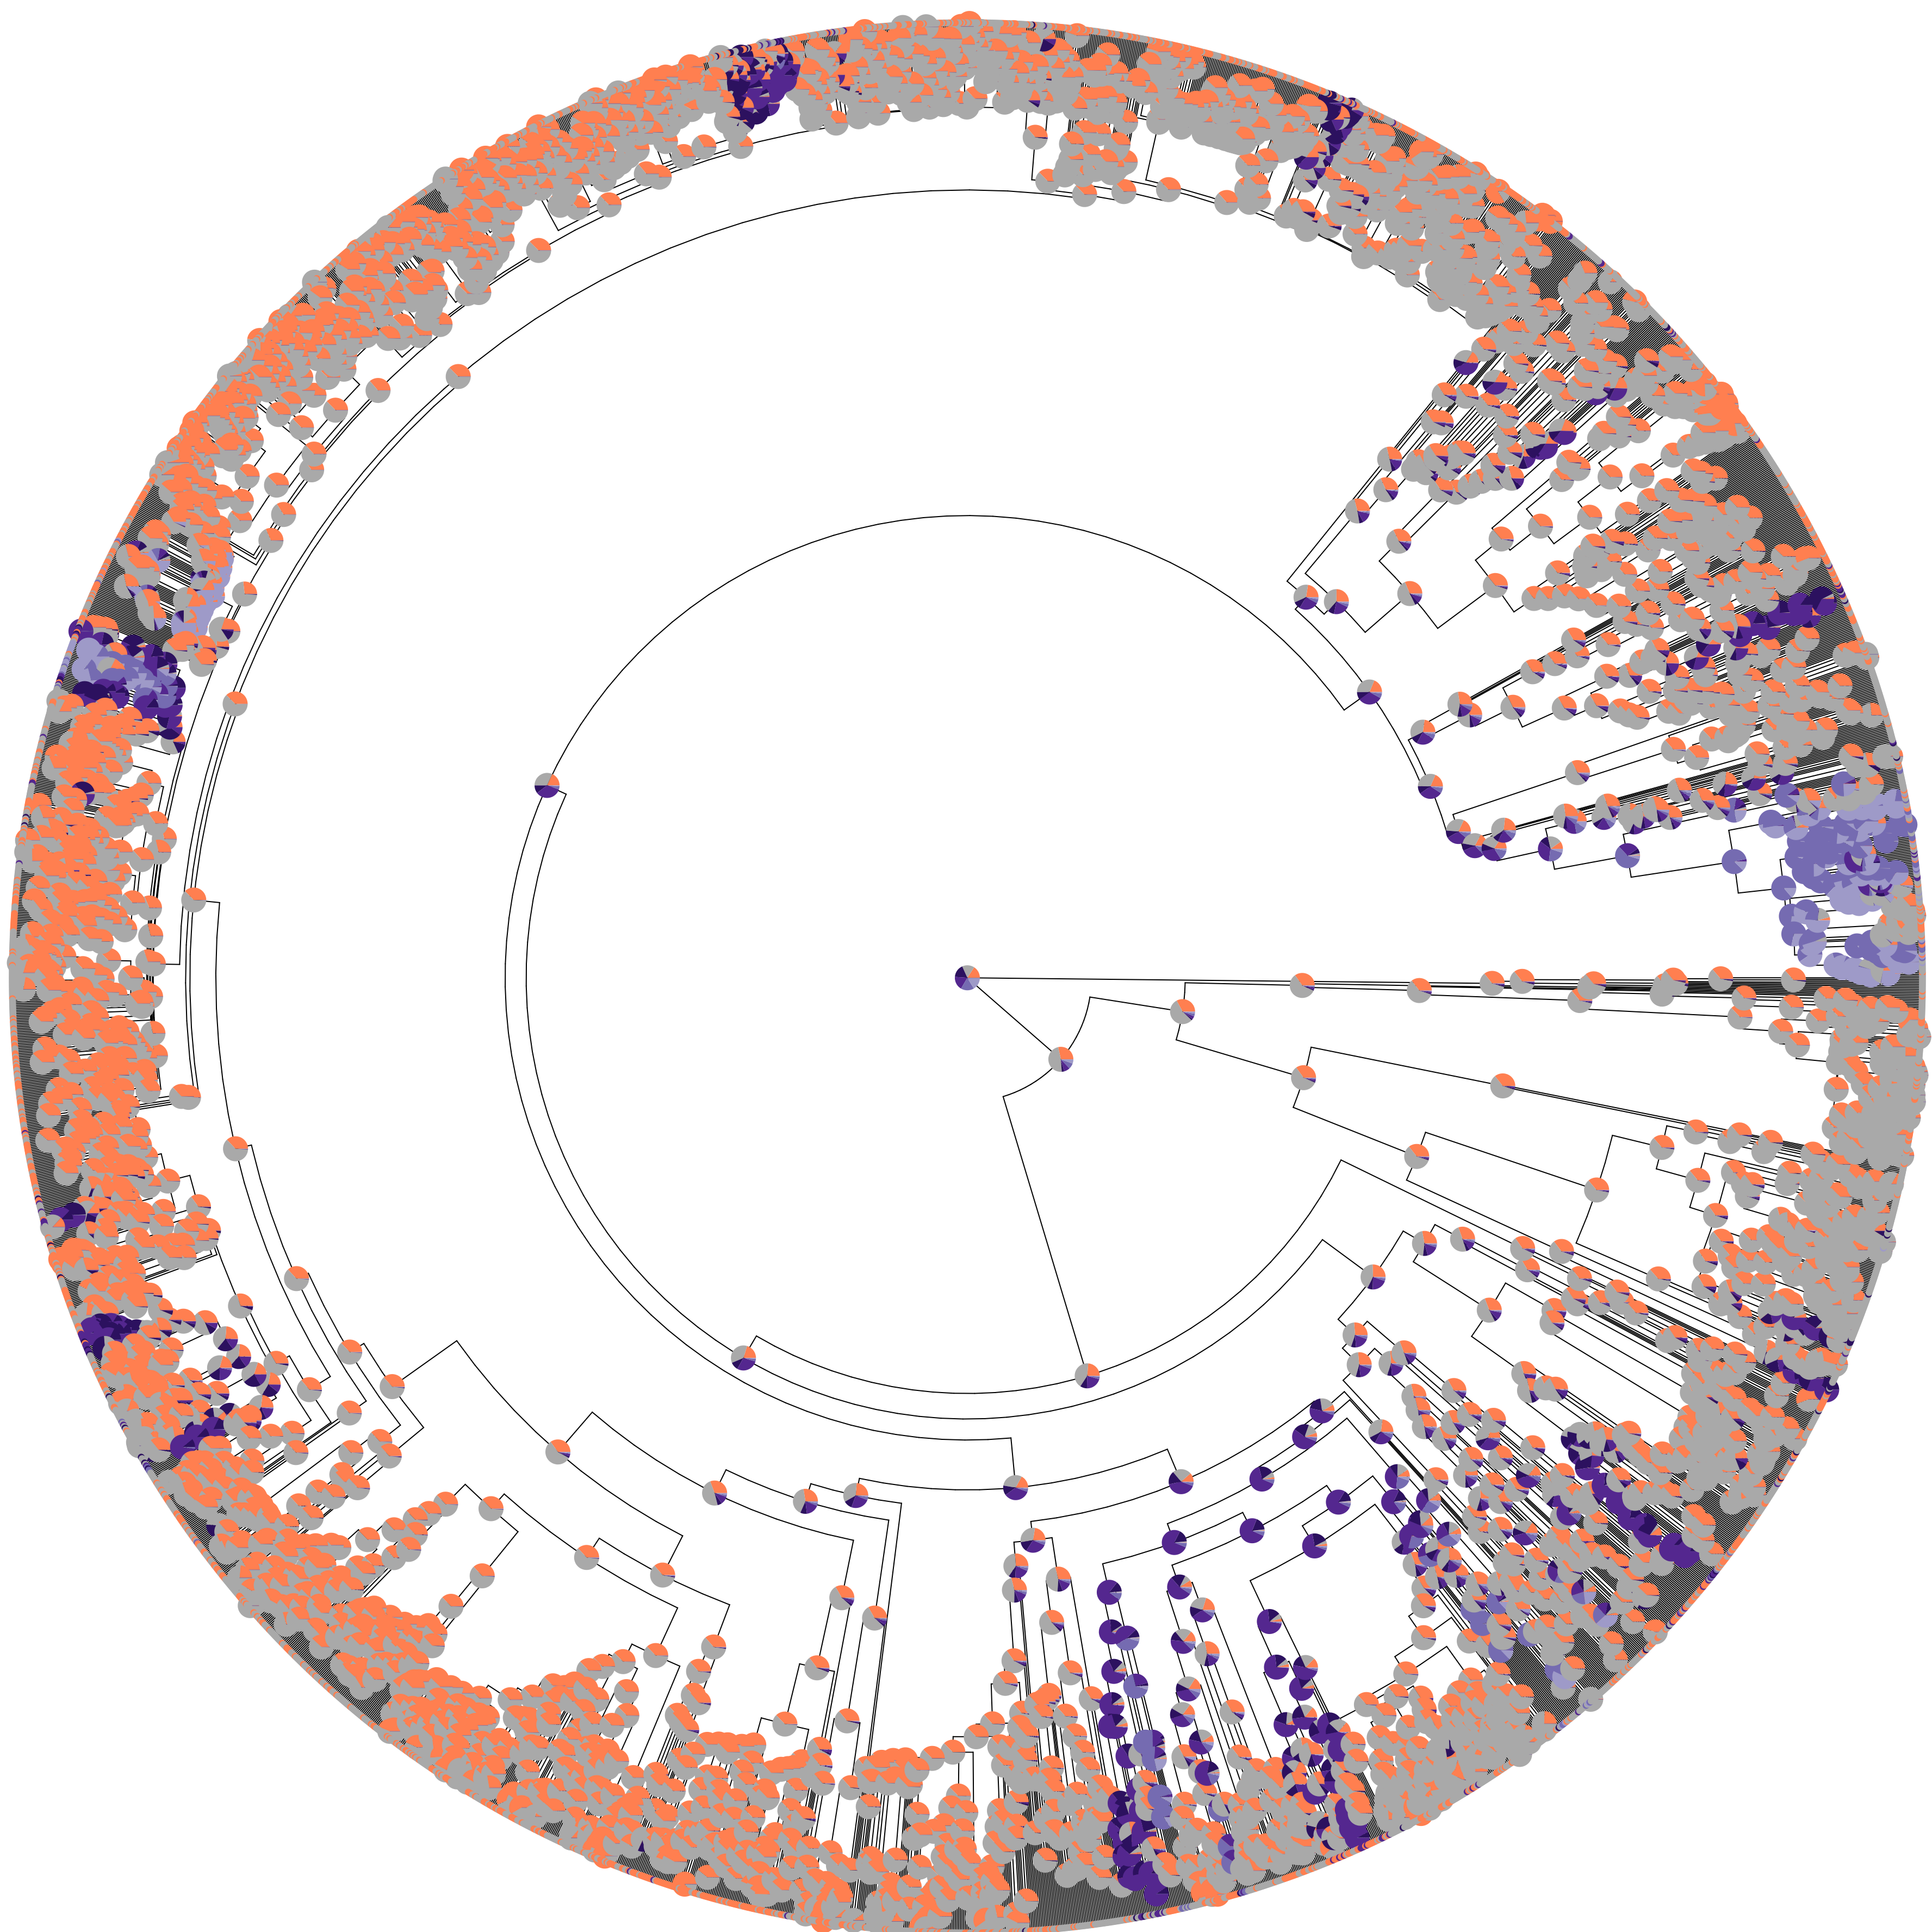

Supplement: Supplementary file 25 [file female_pert_breast.pdf › supp_3/female_pert_breast.pdf]

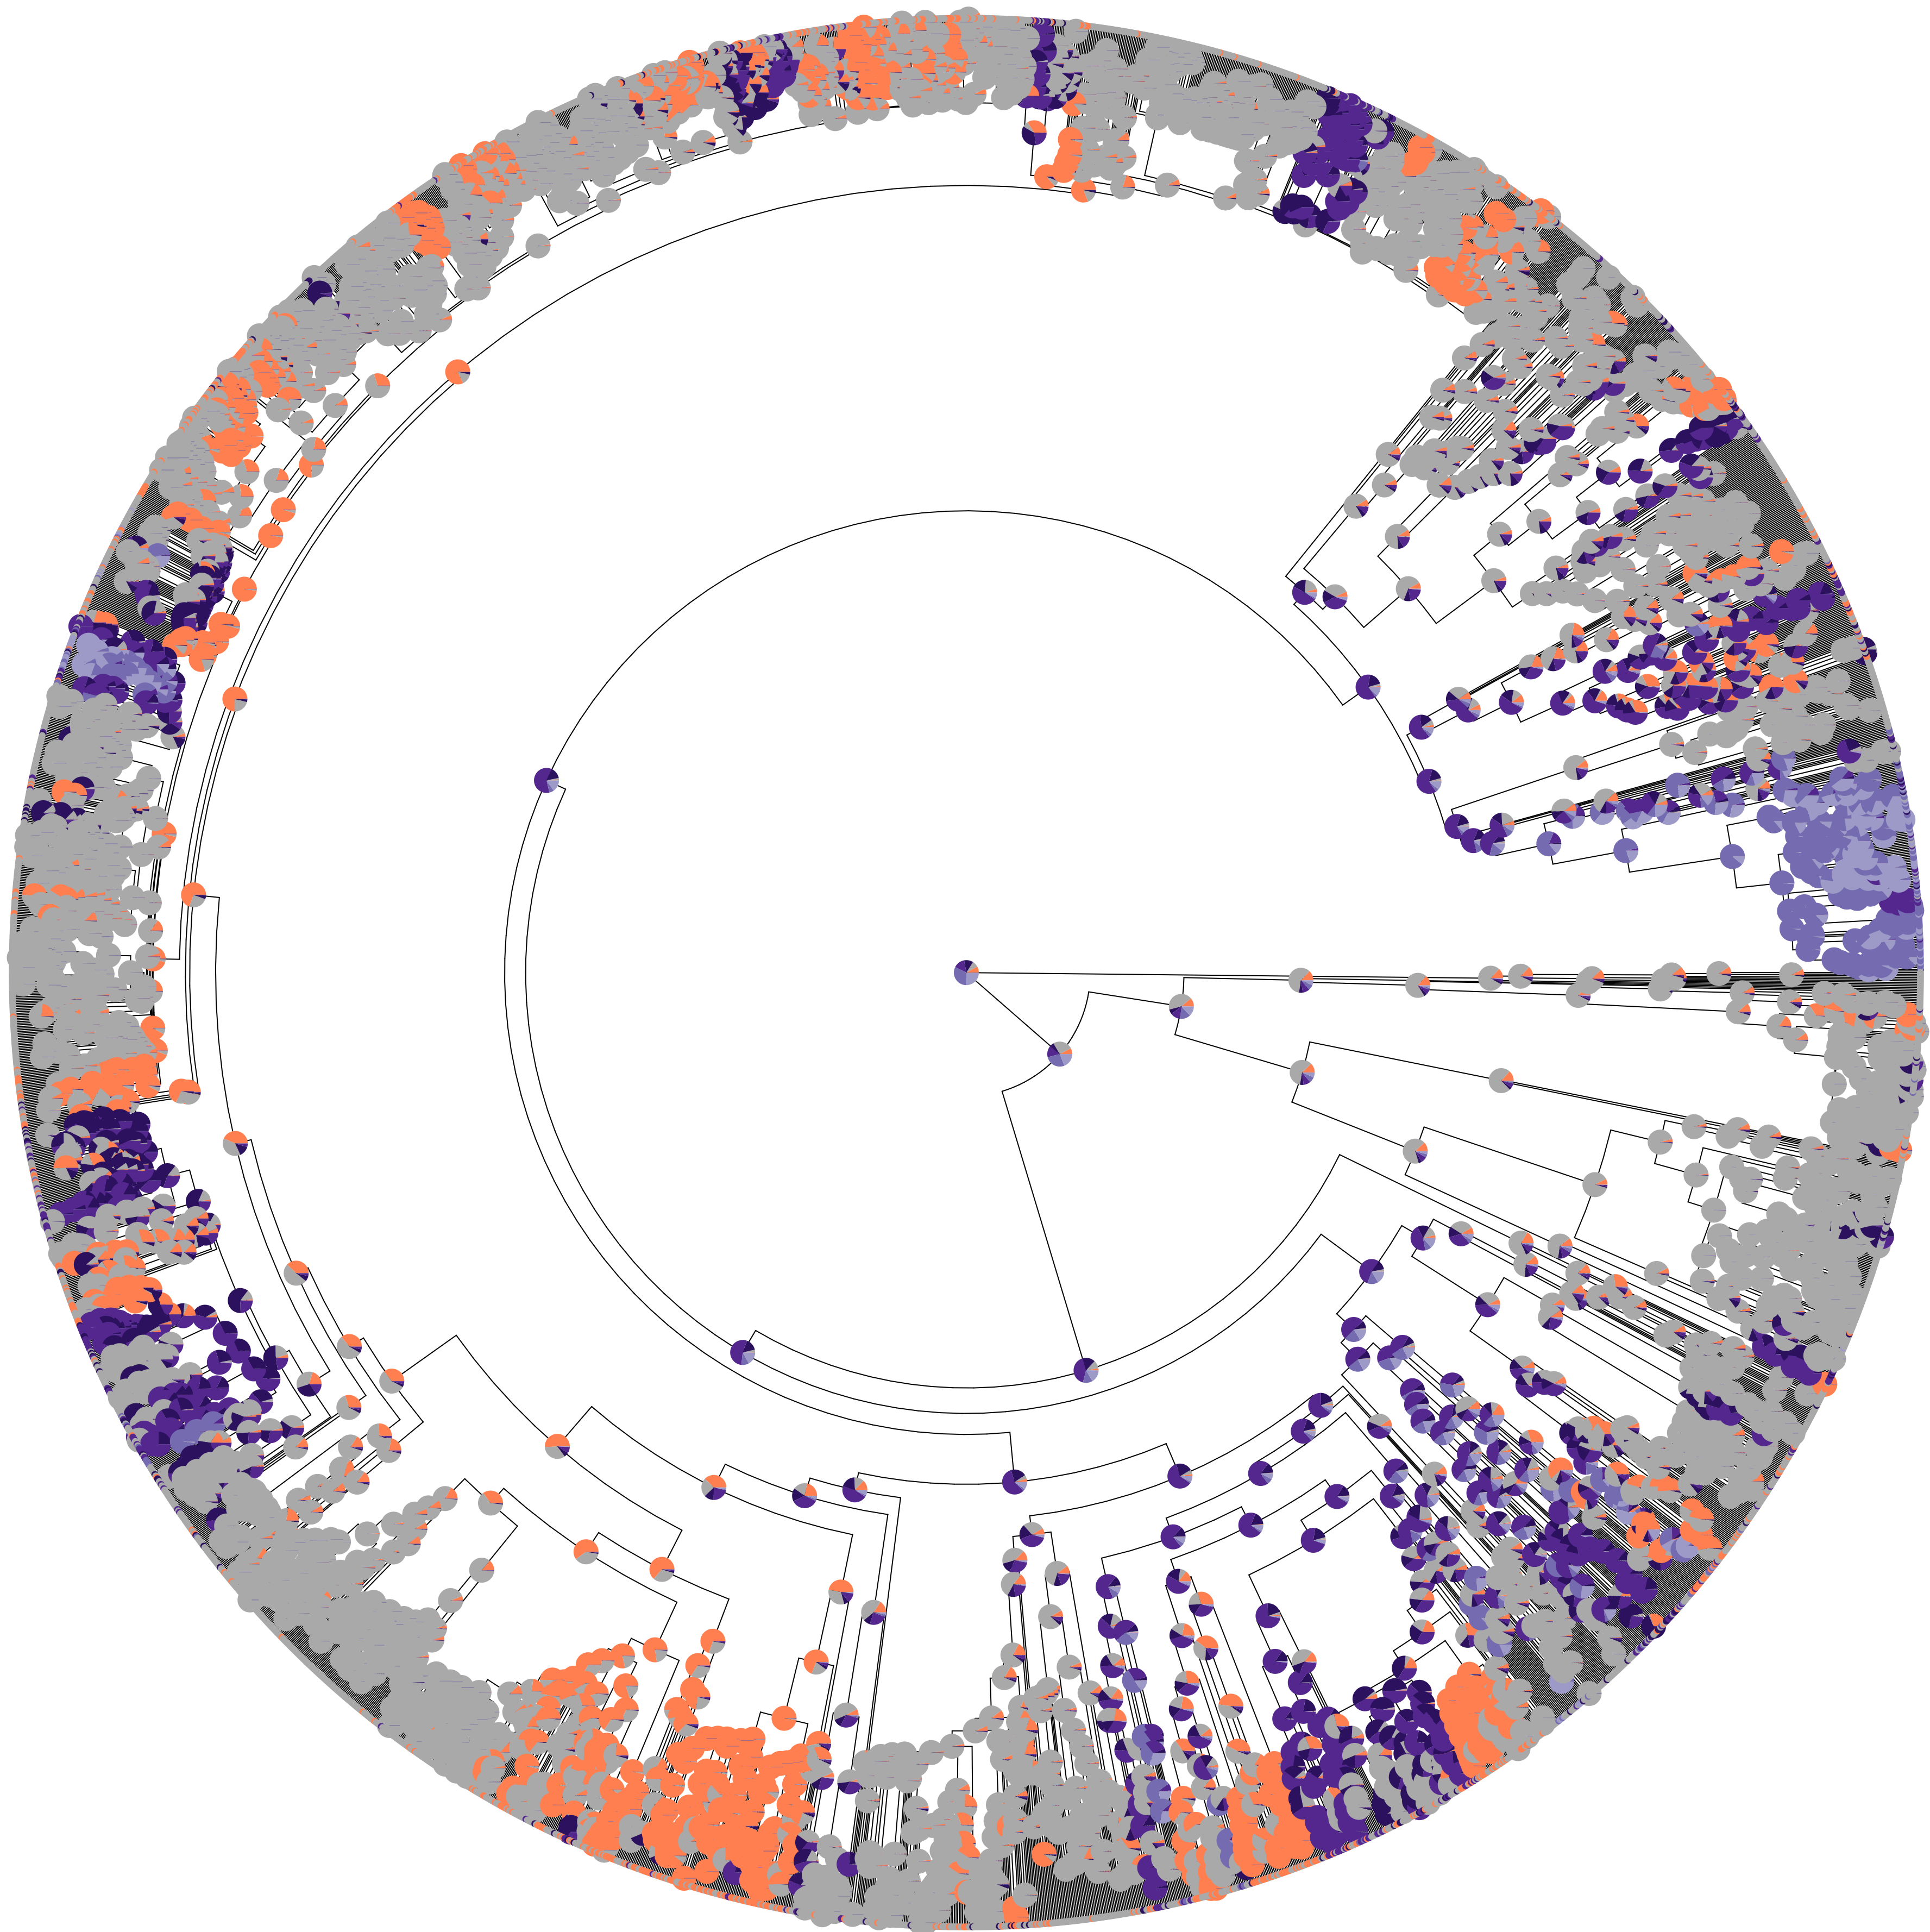

Supplement: Supplementary file 26 [file female_pert_crown.pdf › supp_3/female_pert_crown.pdf]

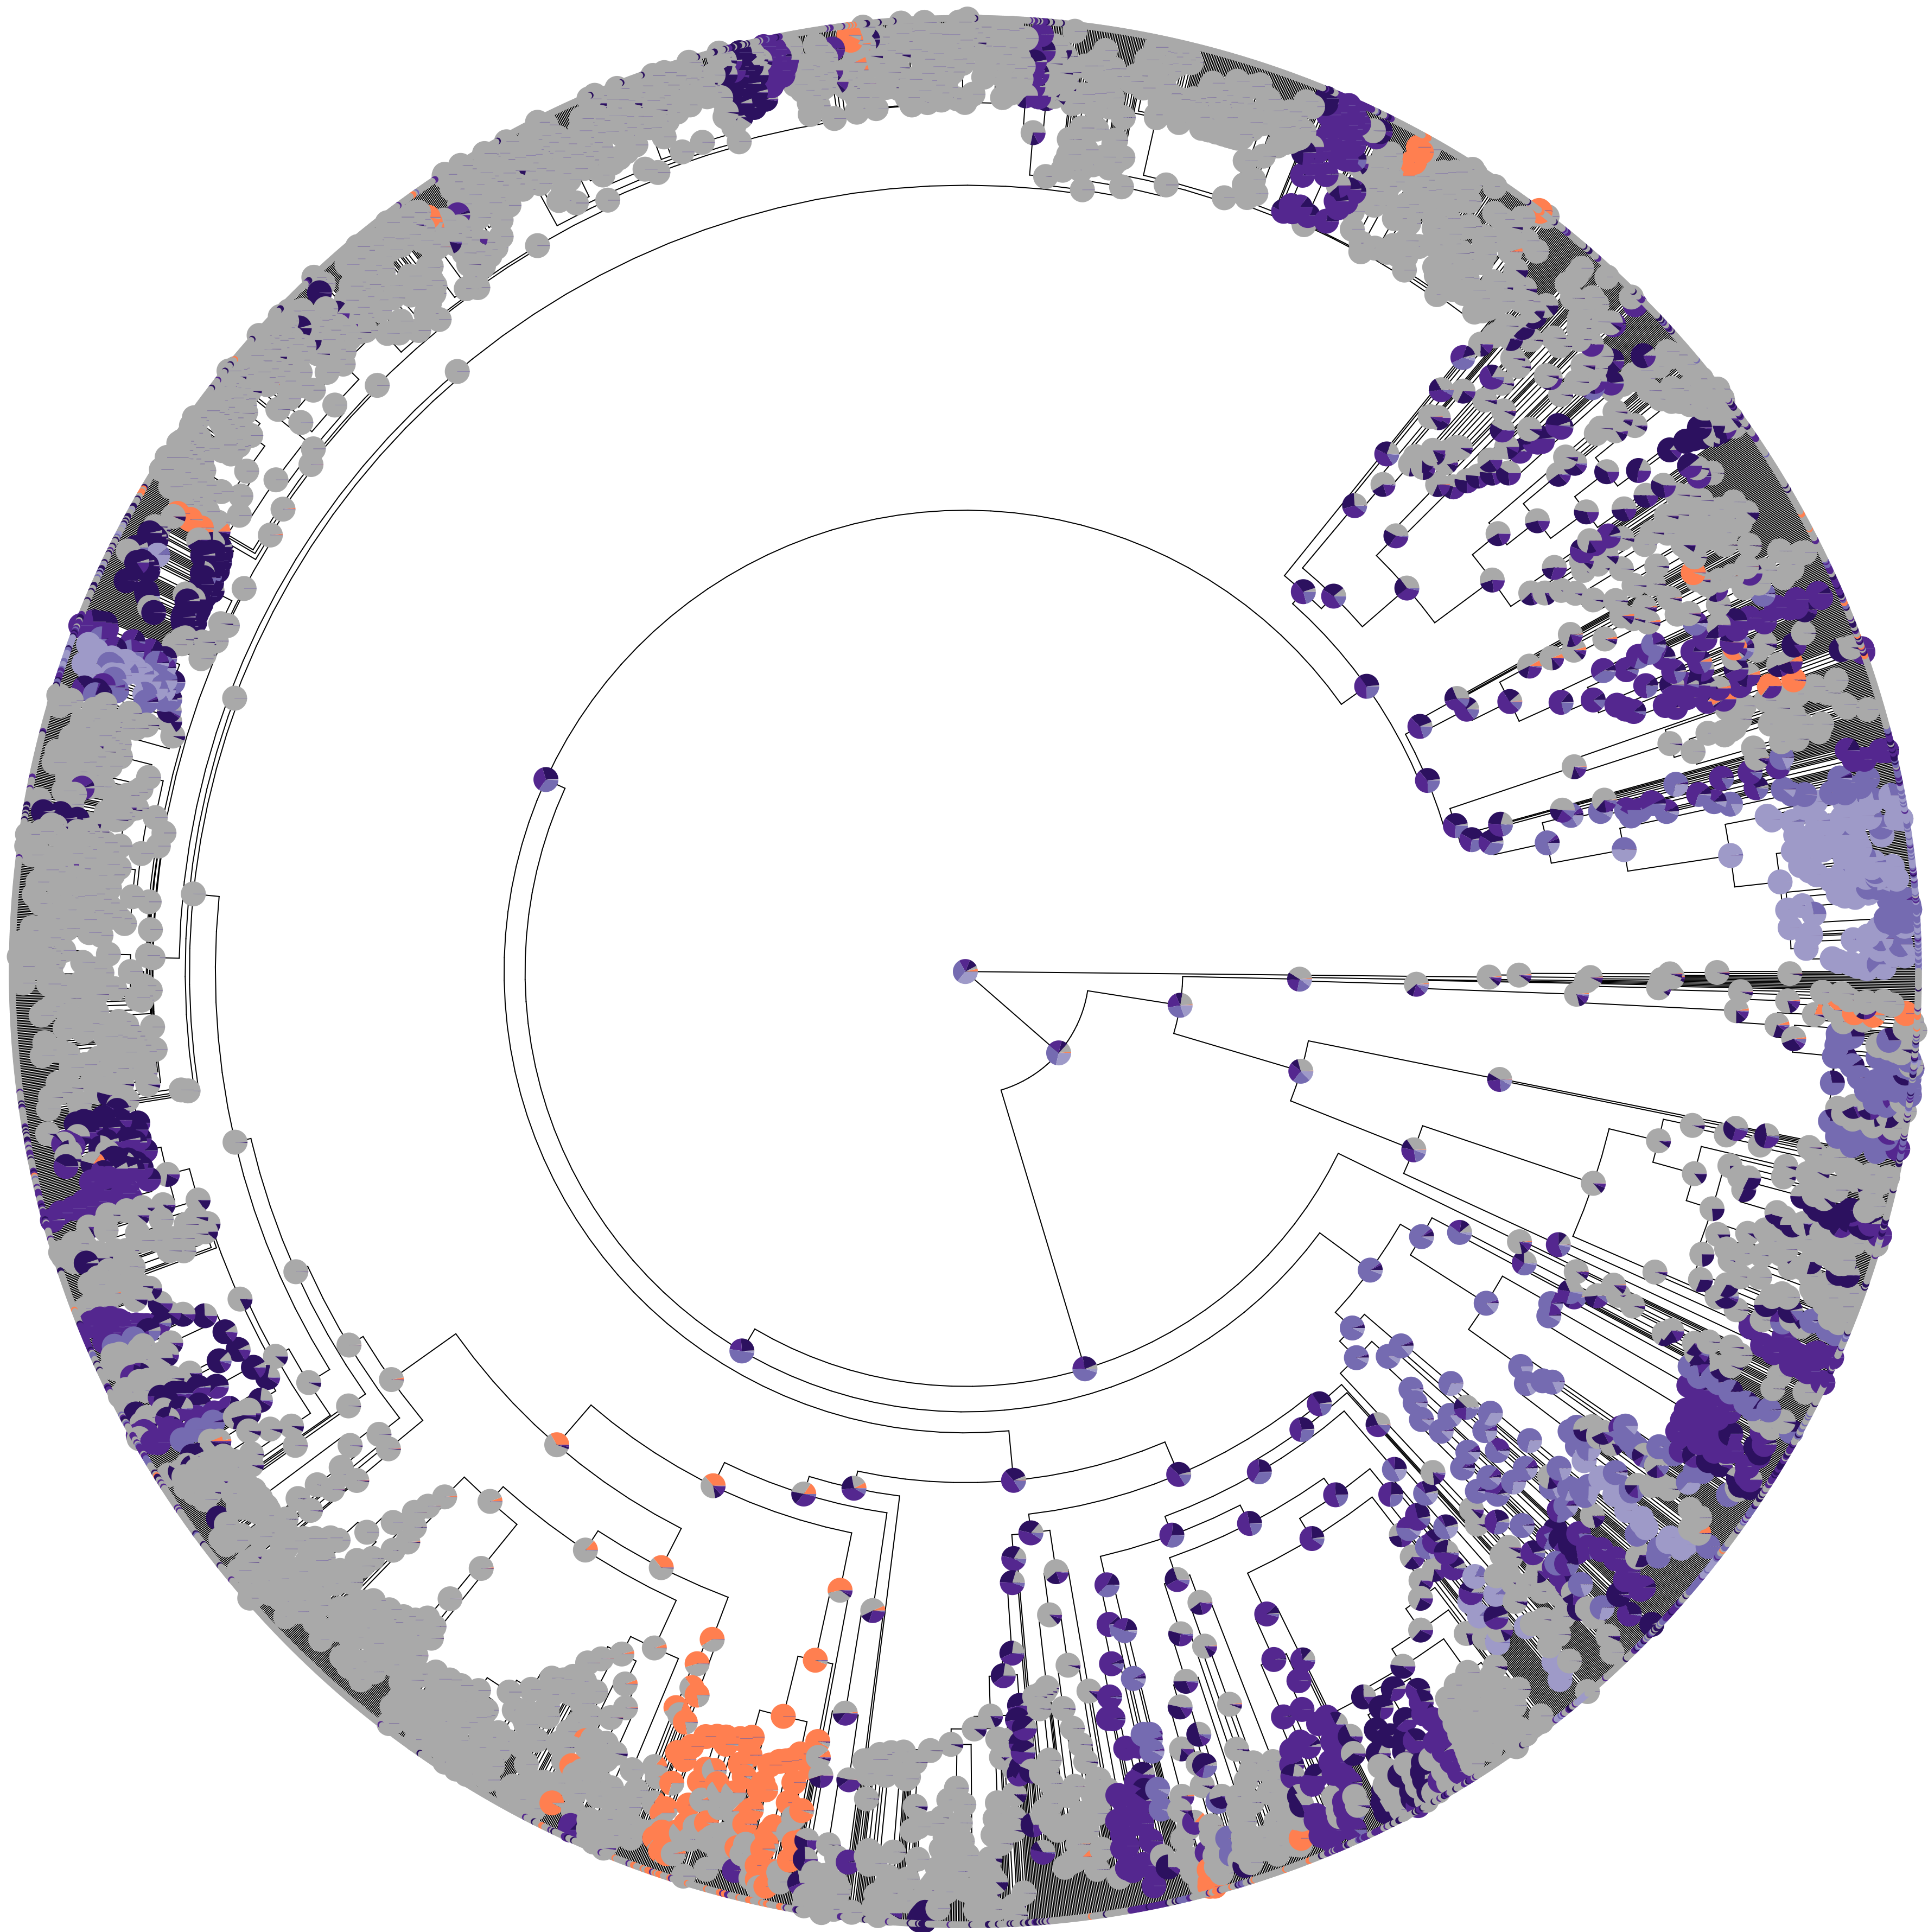

Supplement: Supplementary file 27 [file female_pert_general.pdf › supp_3/female_pert_general.pdf]

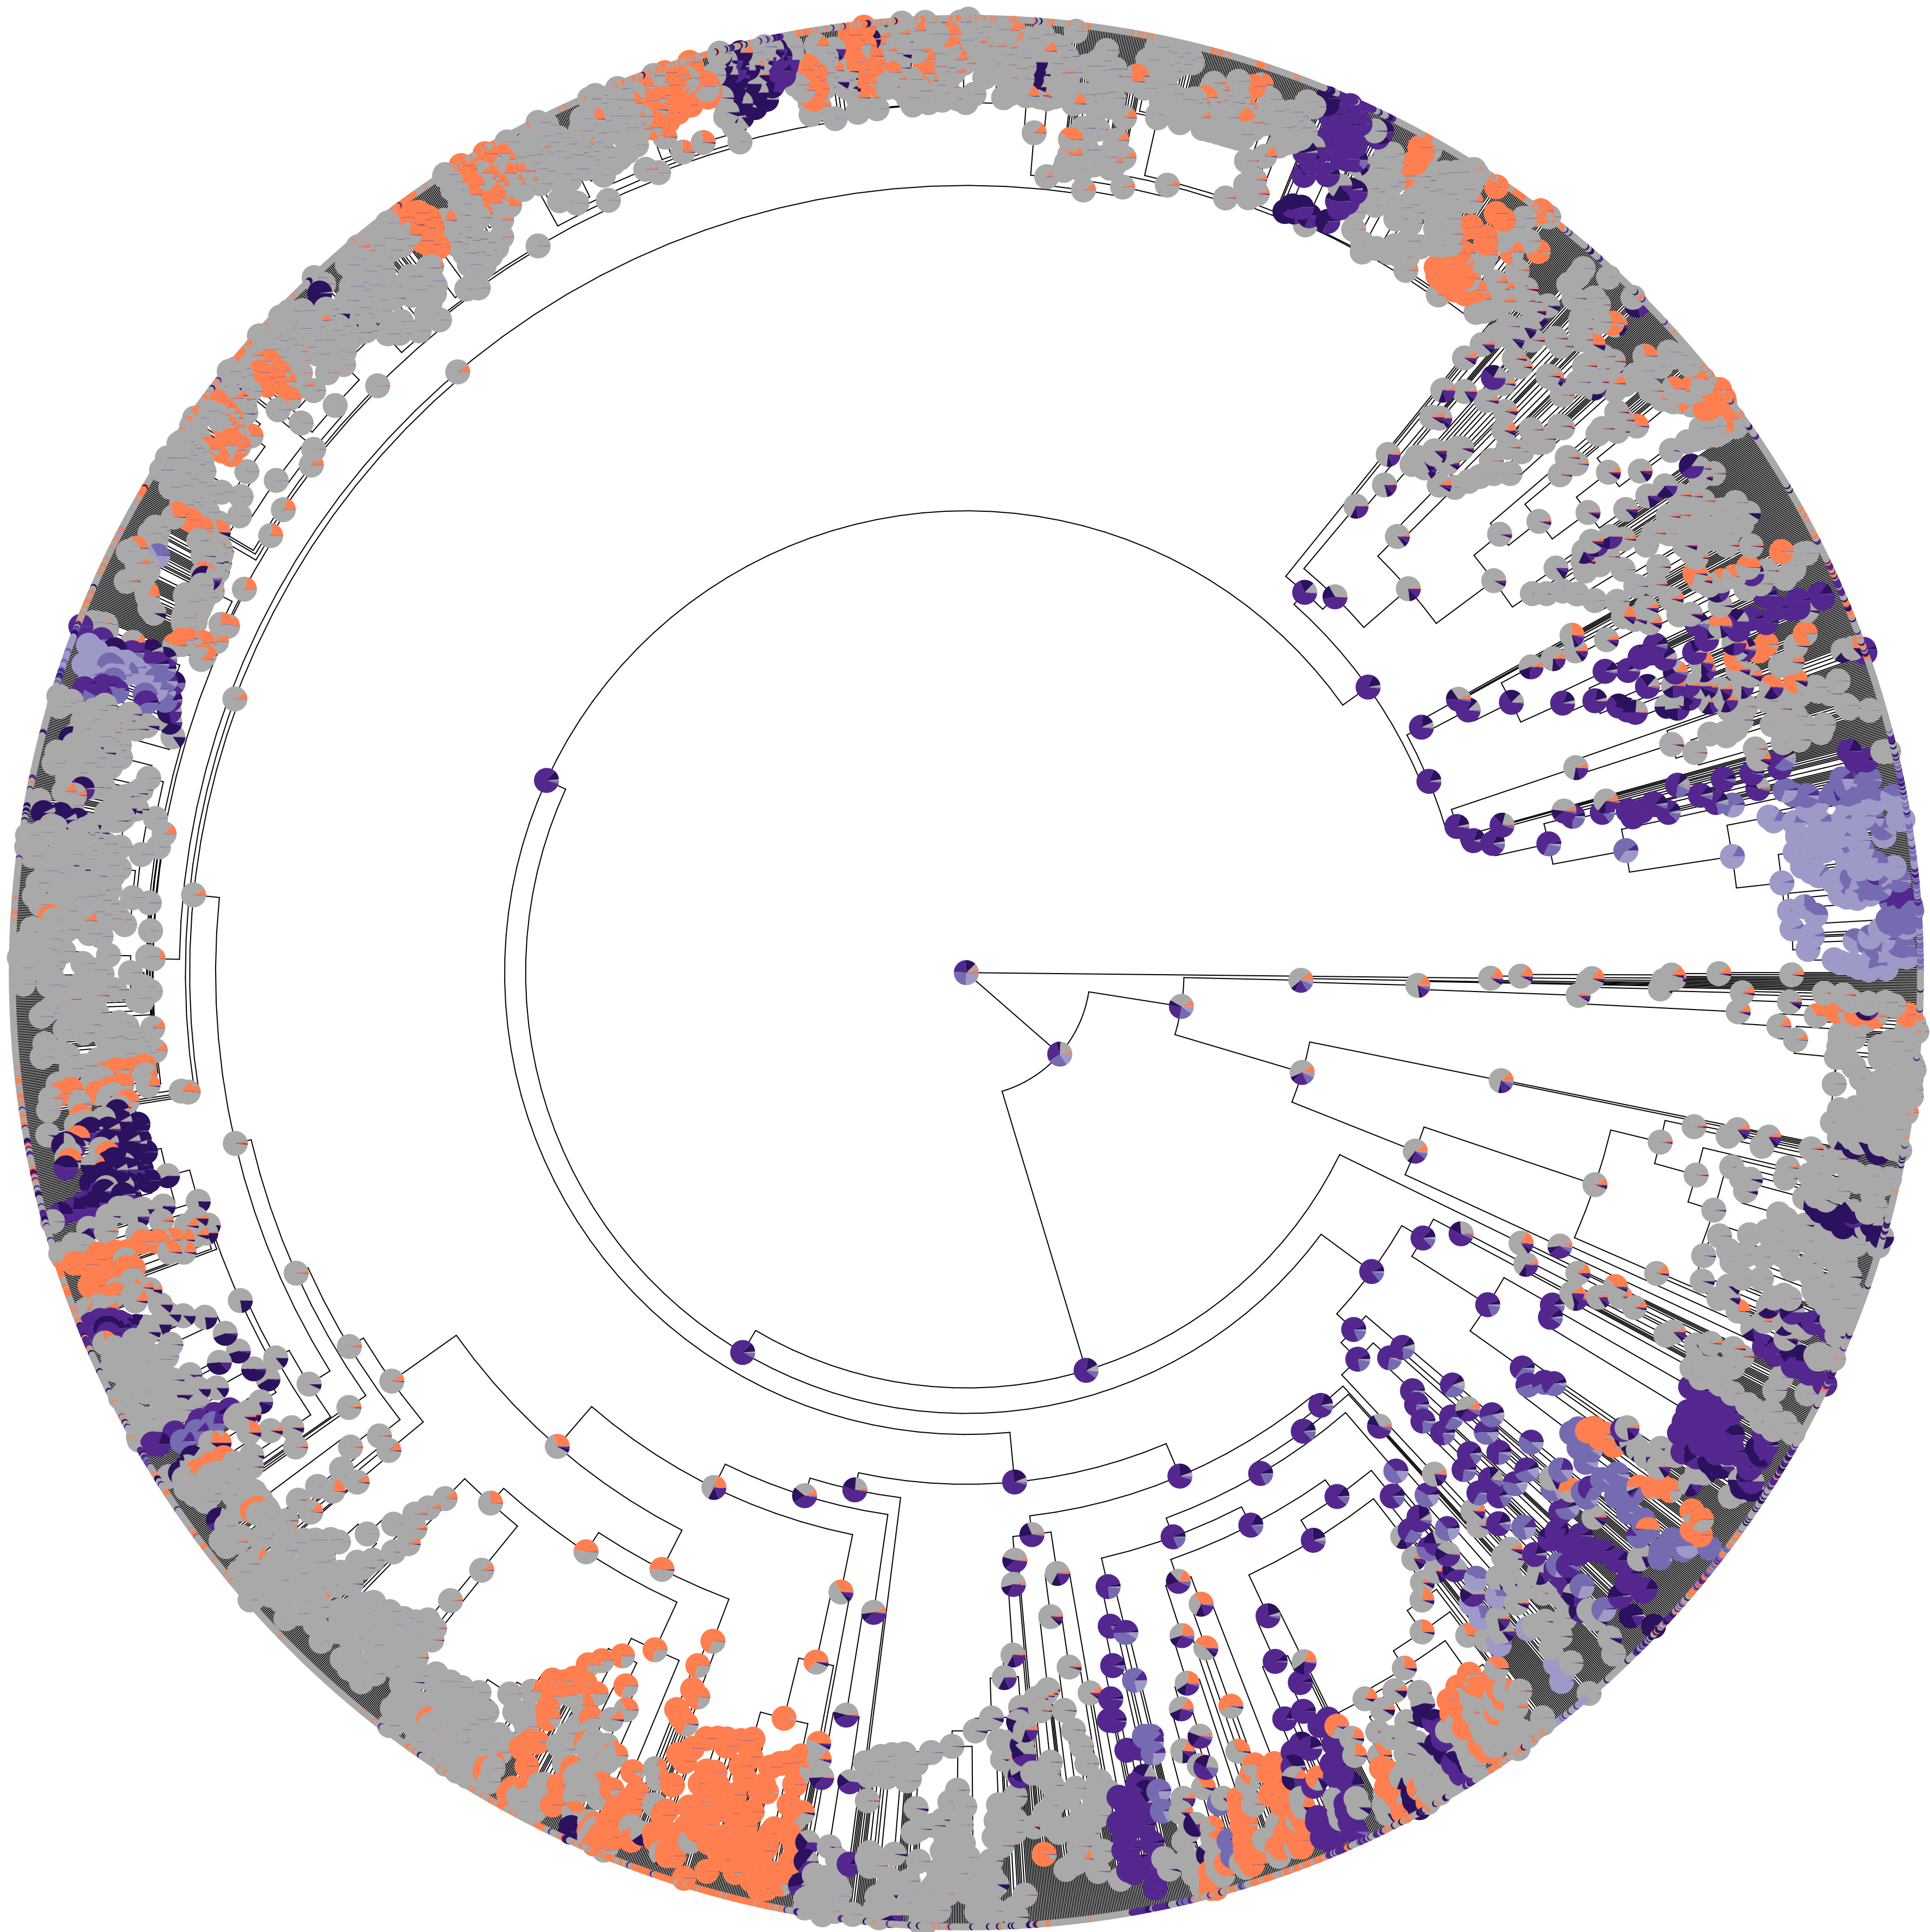

Supplement: Supplementary file 28 [file female_pert_mantle.pdf › supp_3/female_pert_mantle.pdf]

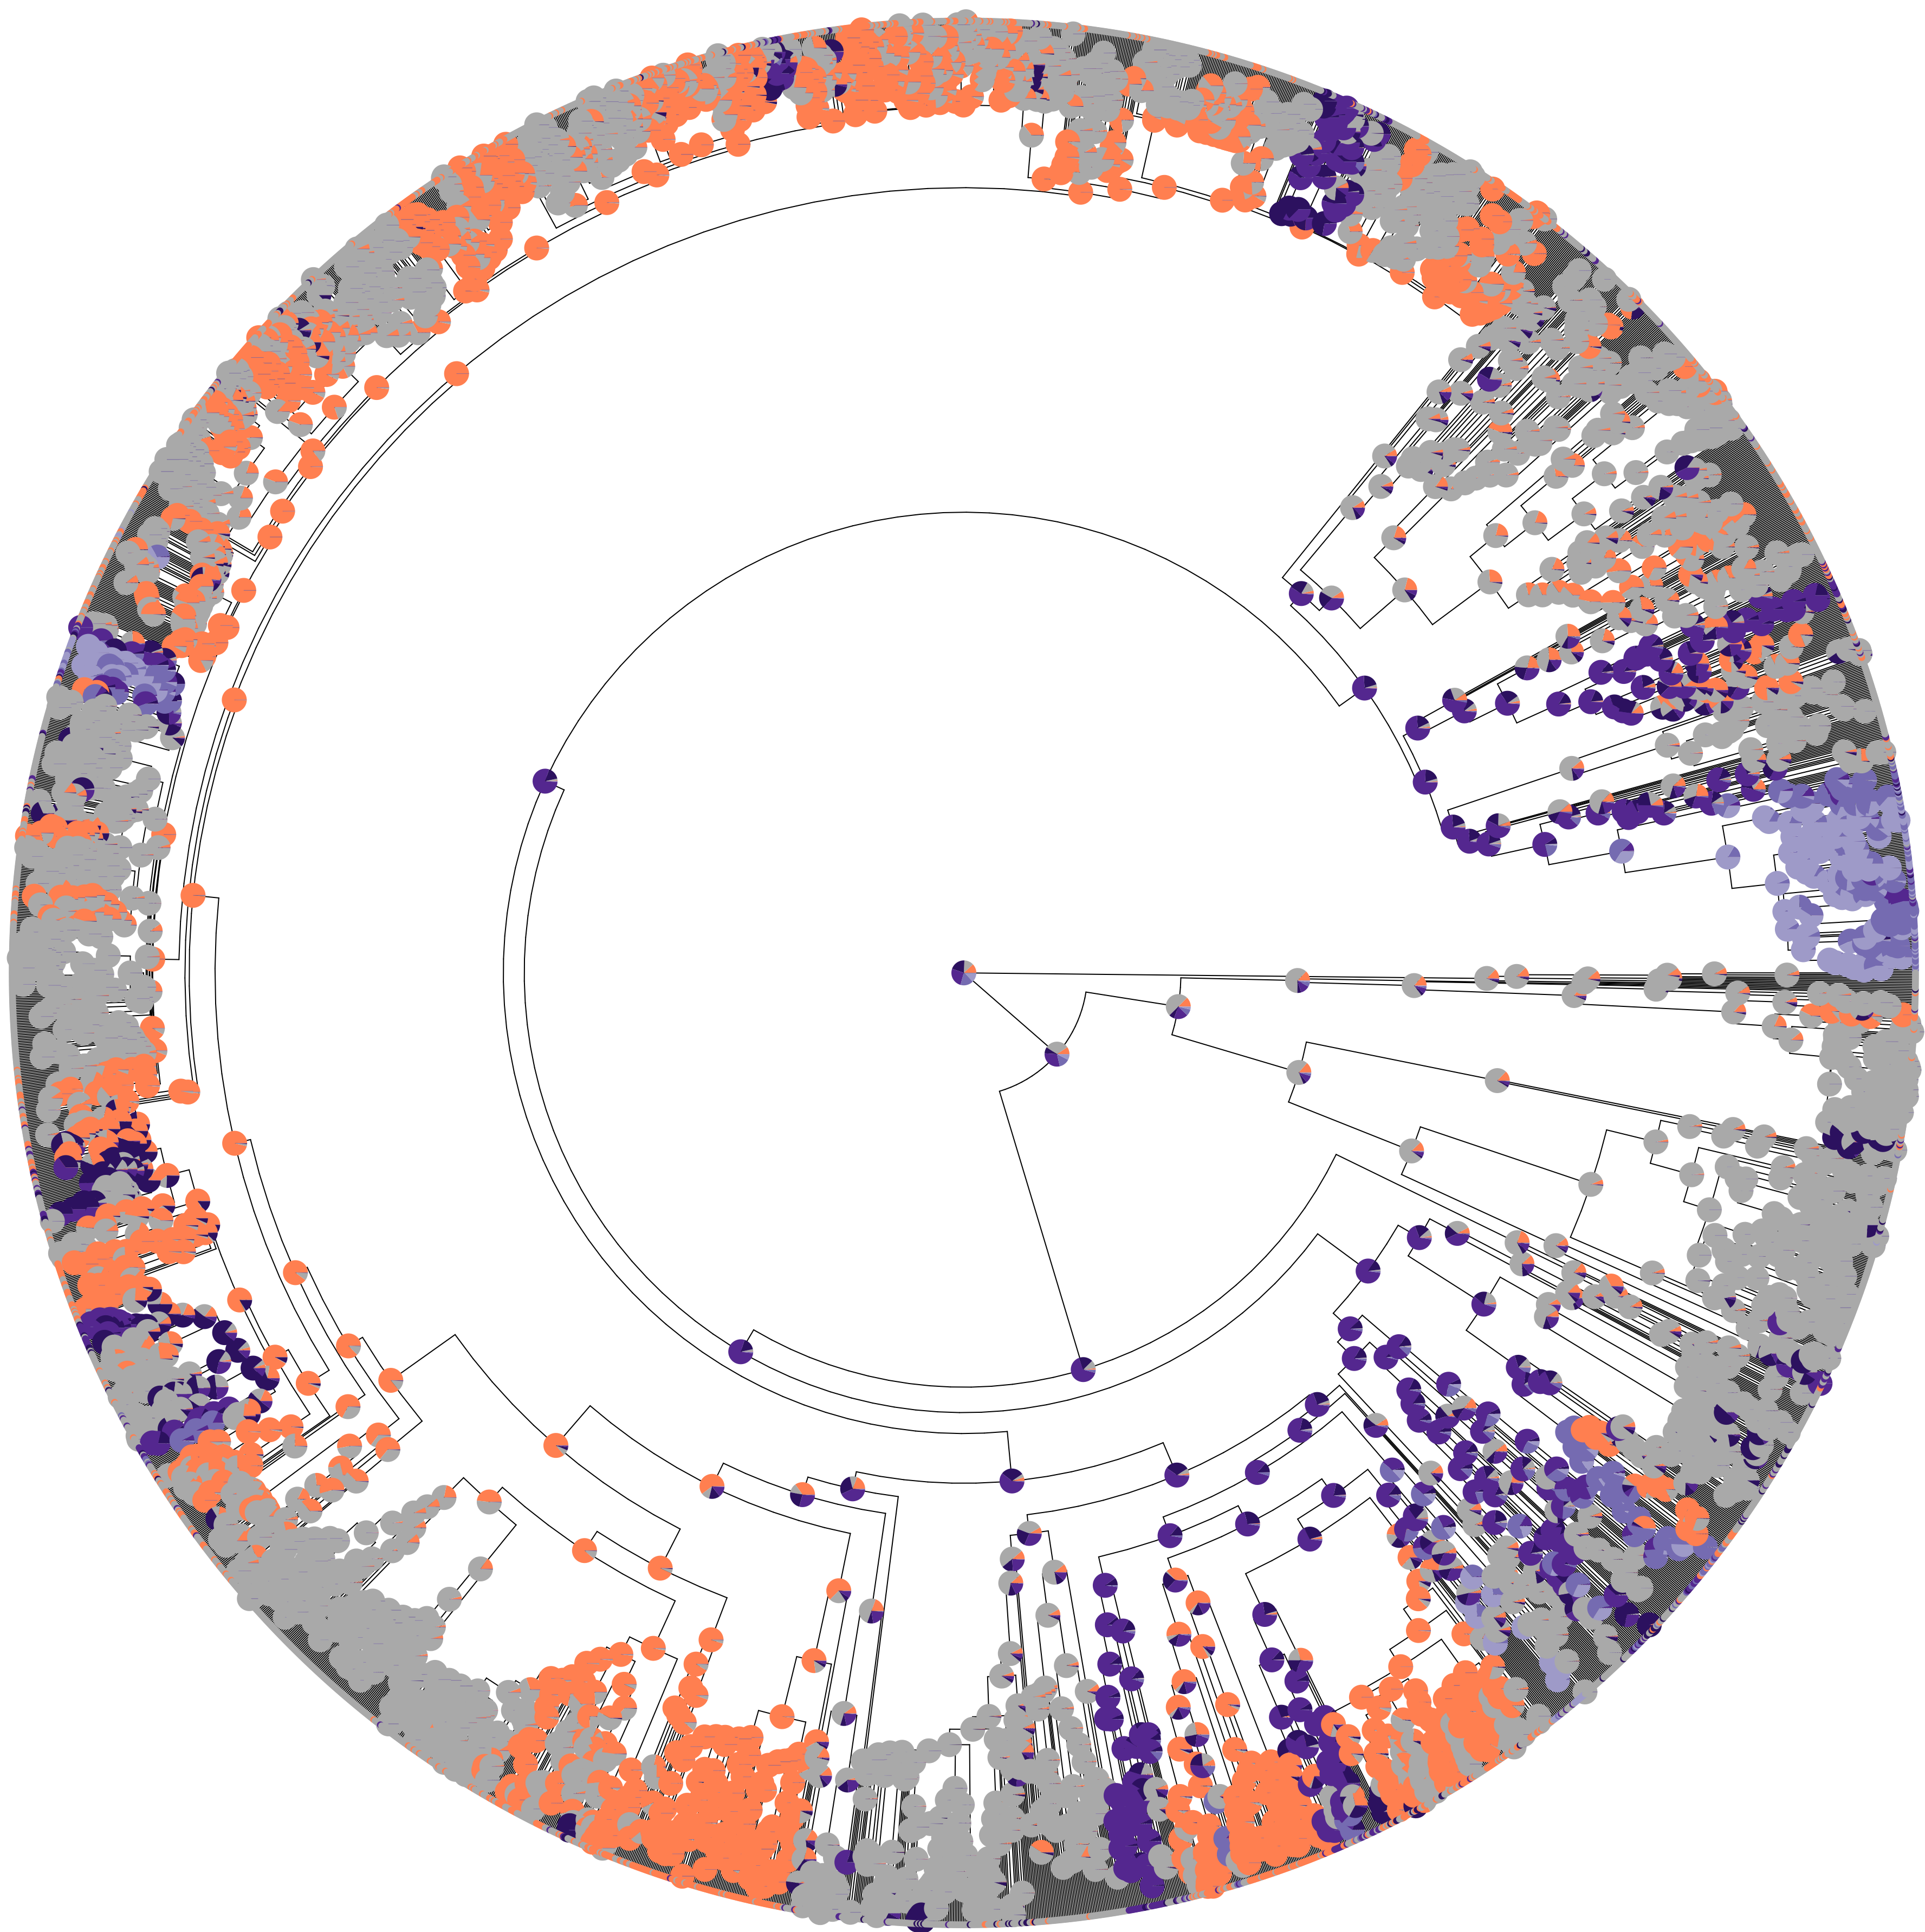

Supplement: Supplementary file 29 [file female_pert_rump.pdf › supp_3/female_pert_rump.pdf]

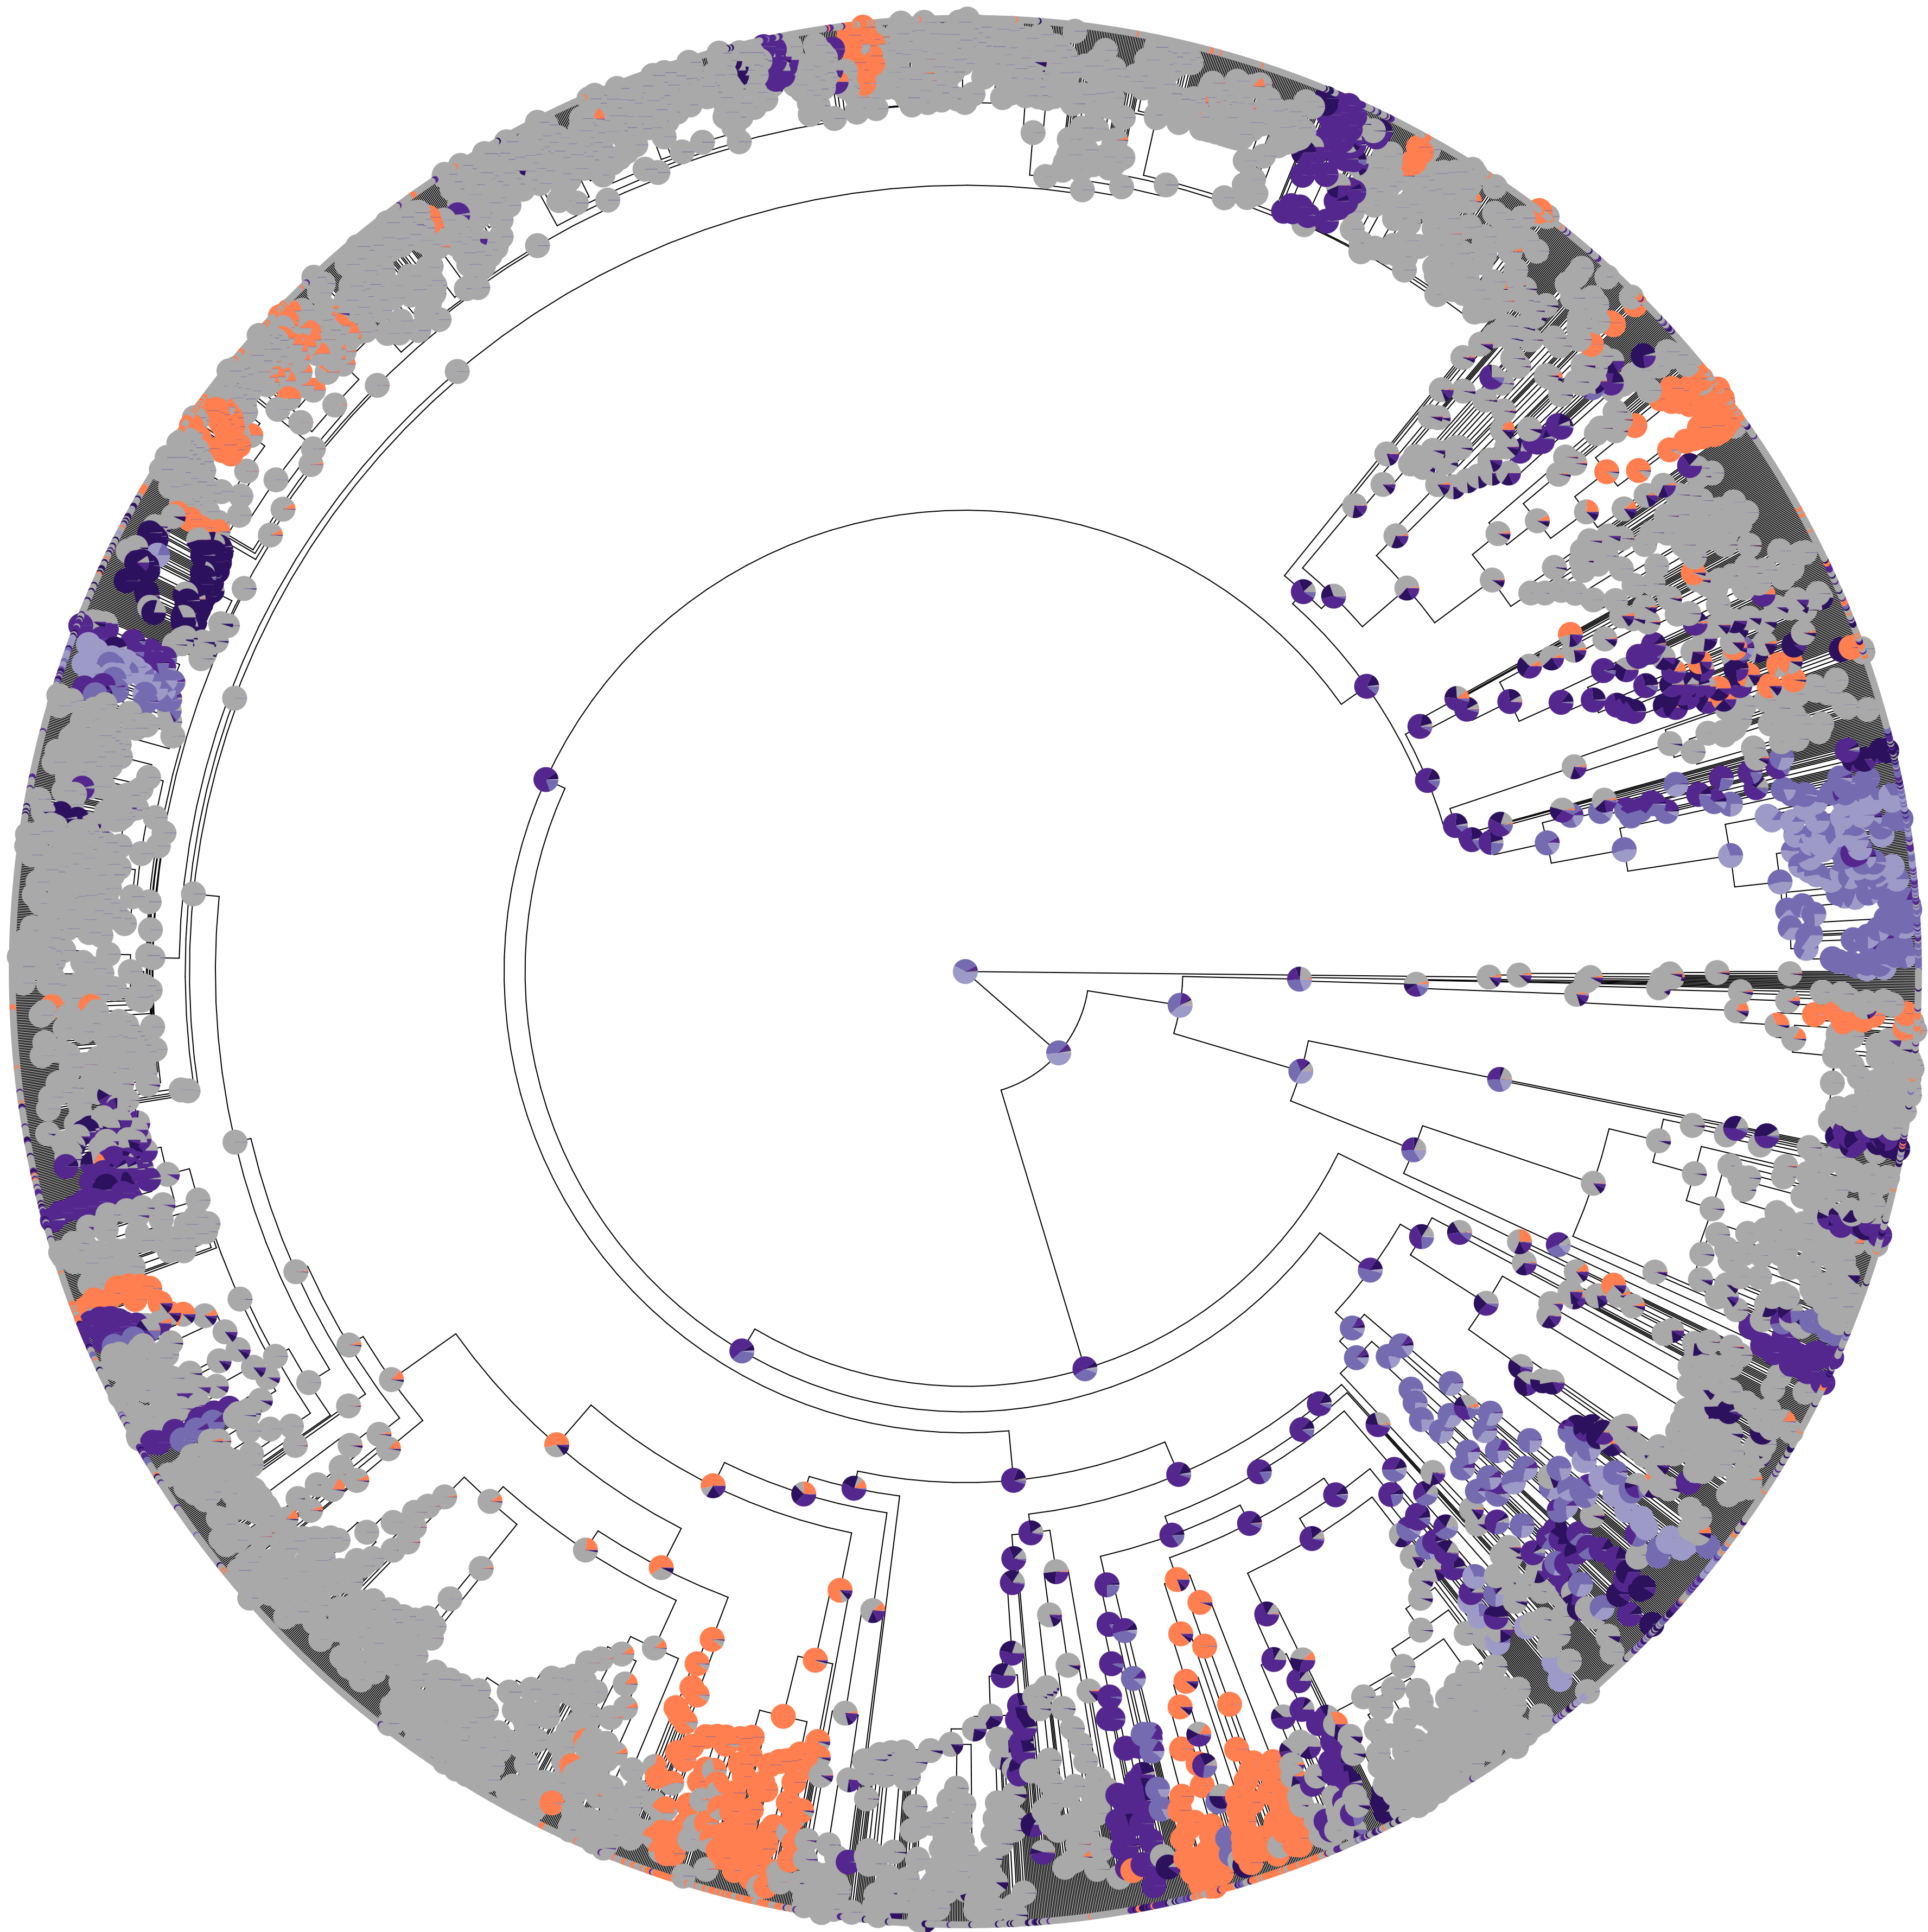

Supplement: Supplementary file 30 [file female_pert_tail.pdf › supp_3/female_pert_tail.pdf]

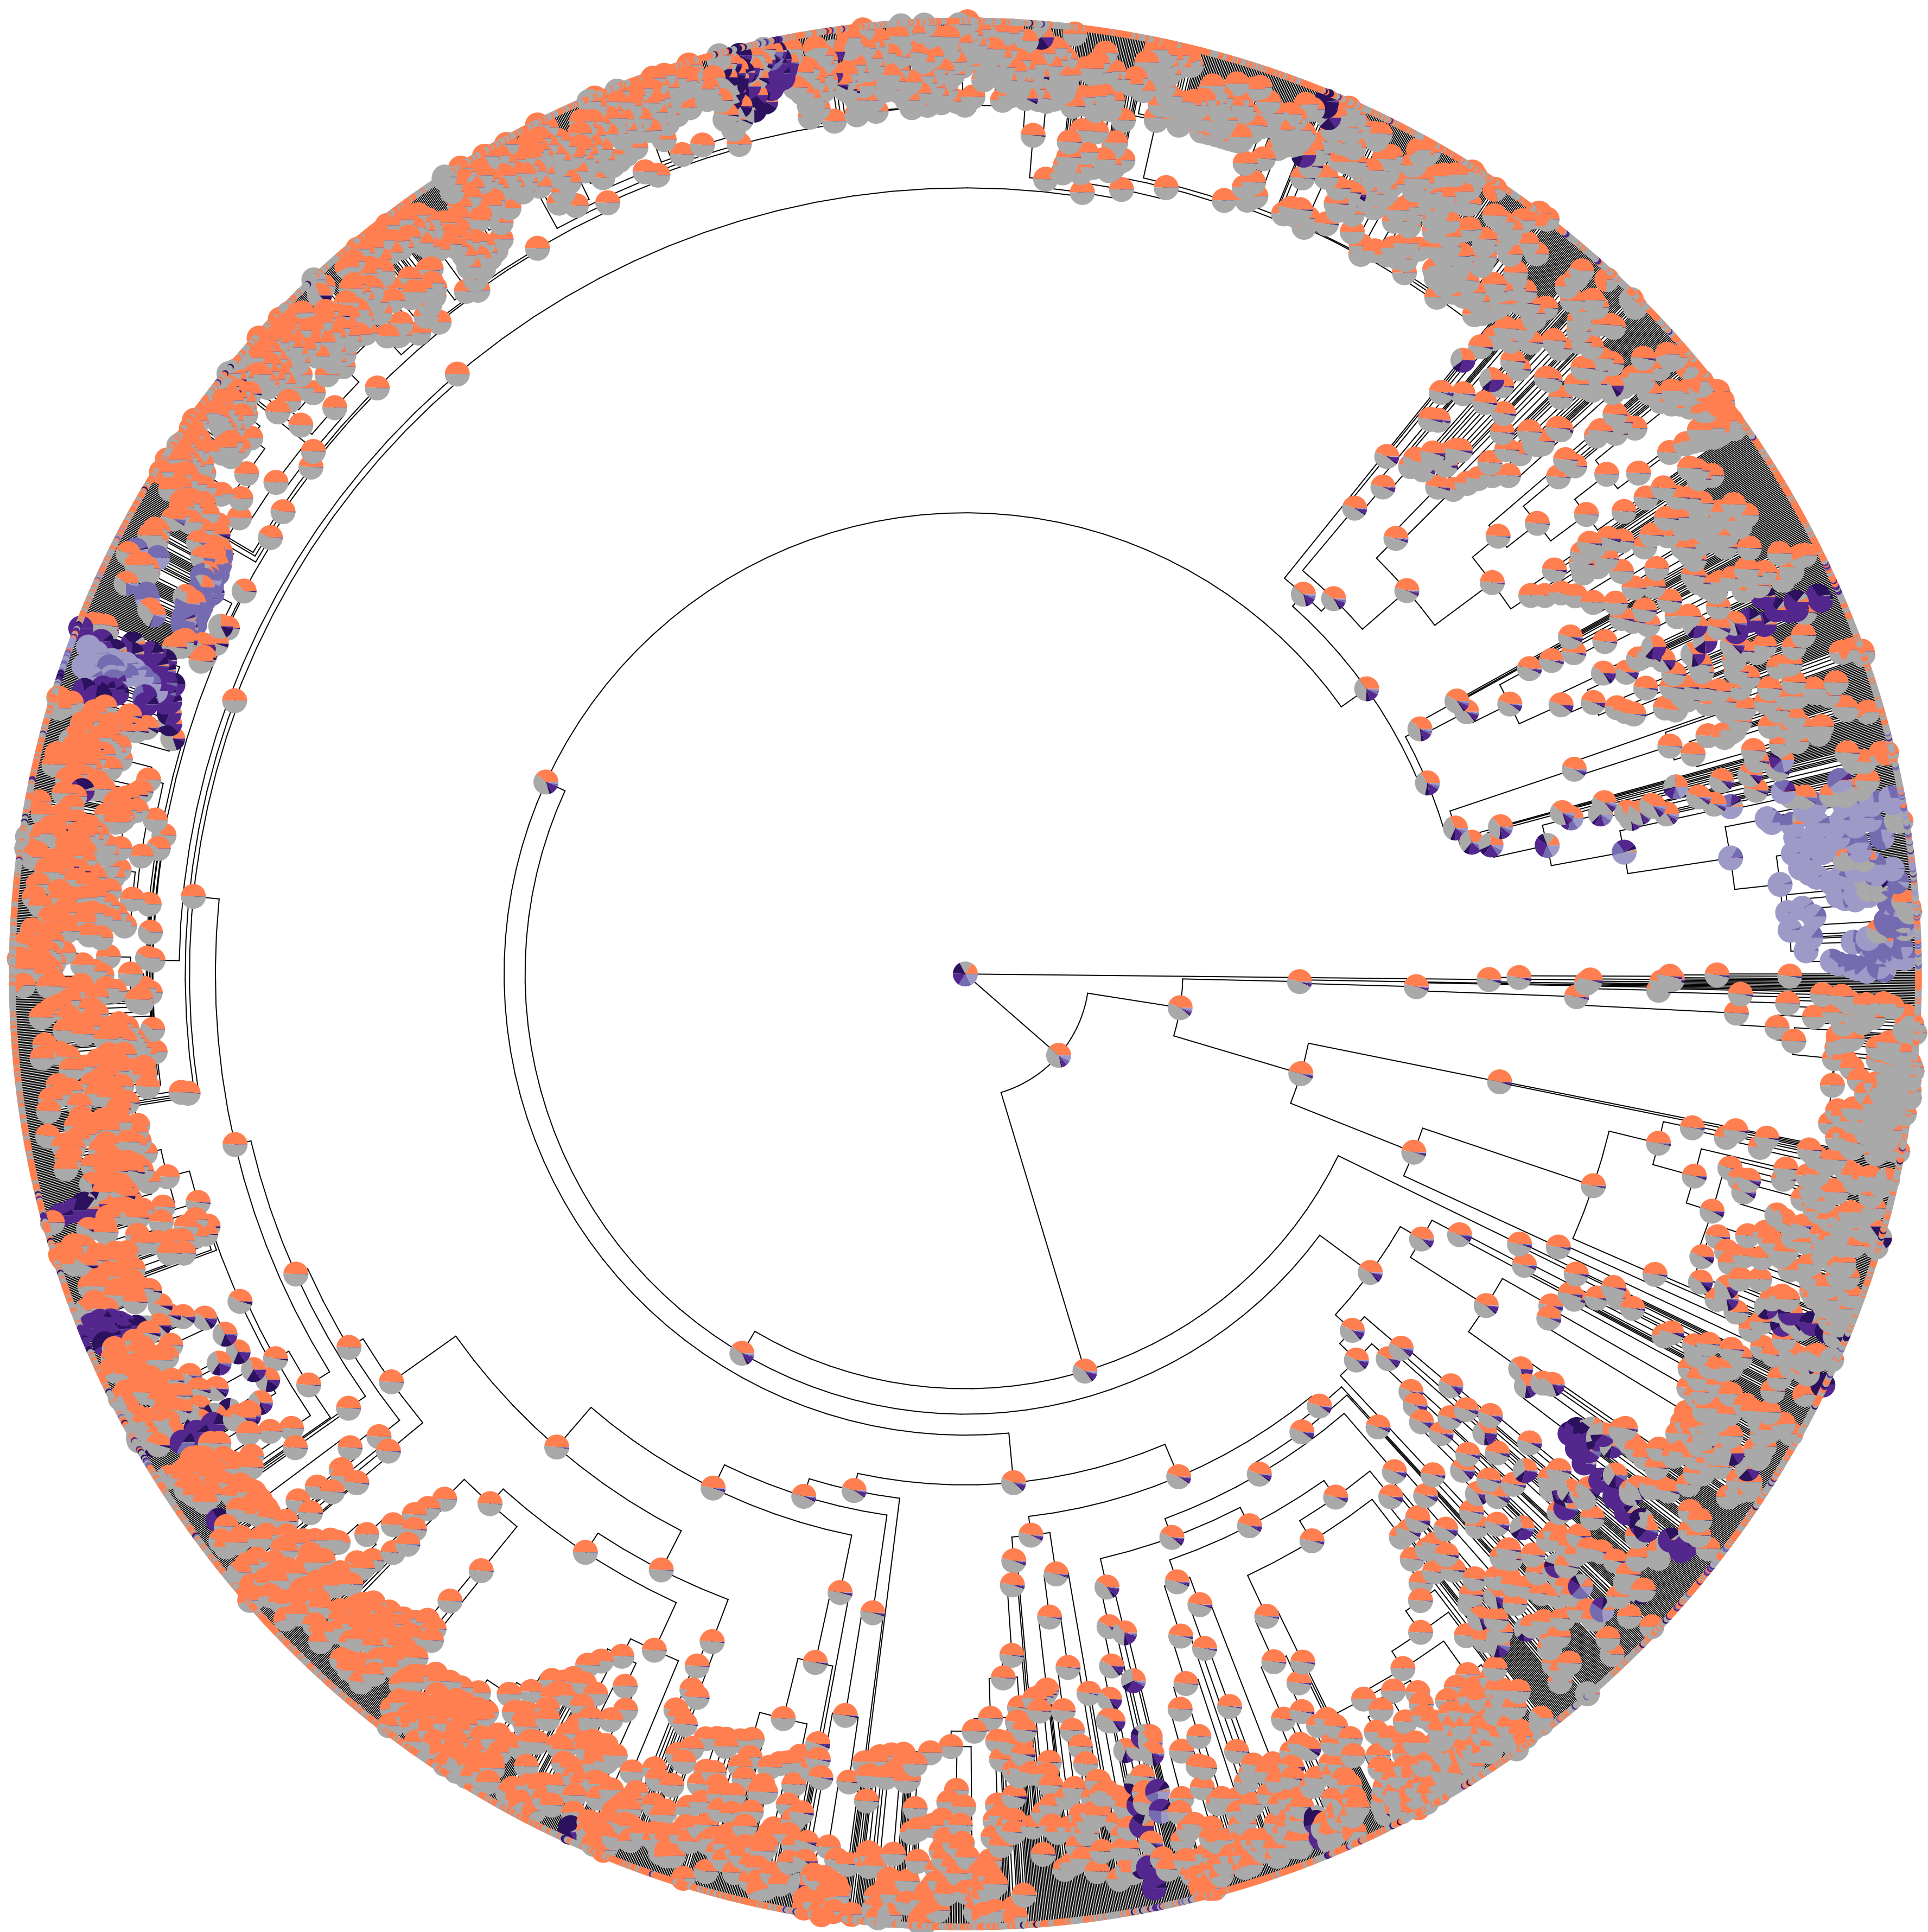

Supplement: Supplementary file 31 [file female_pert_throat.pdf › supp_3/female_pert_throat.pdf]

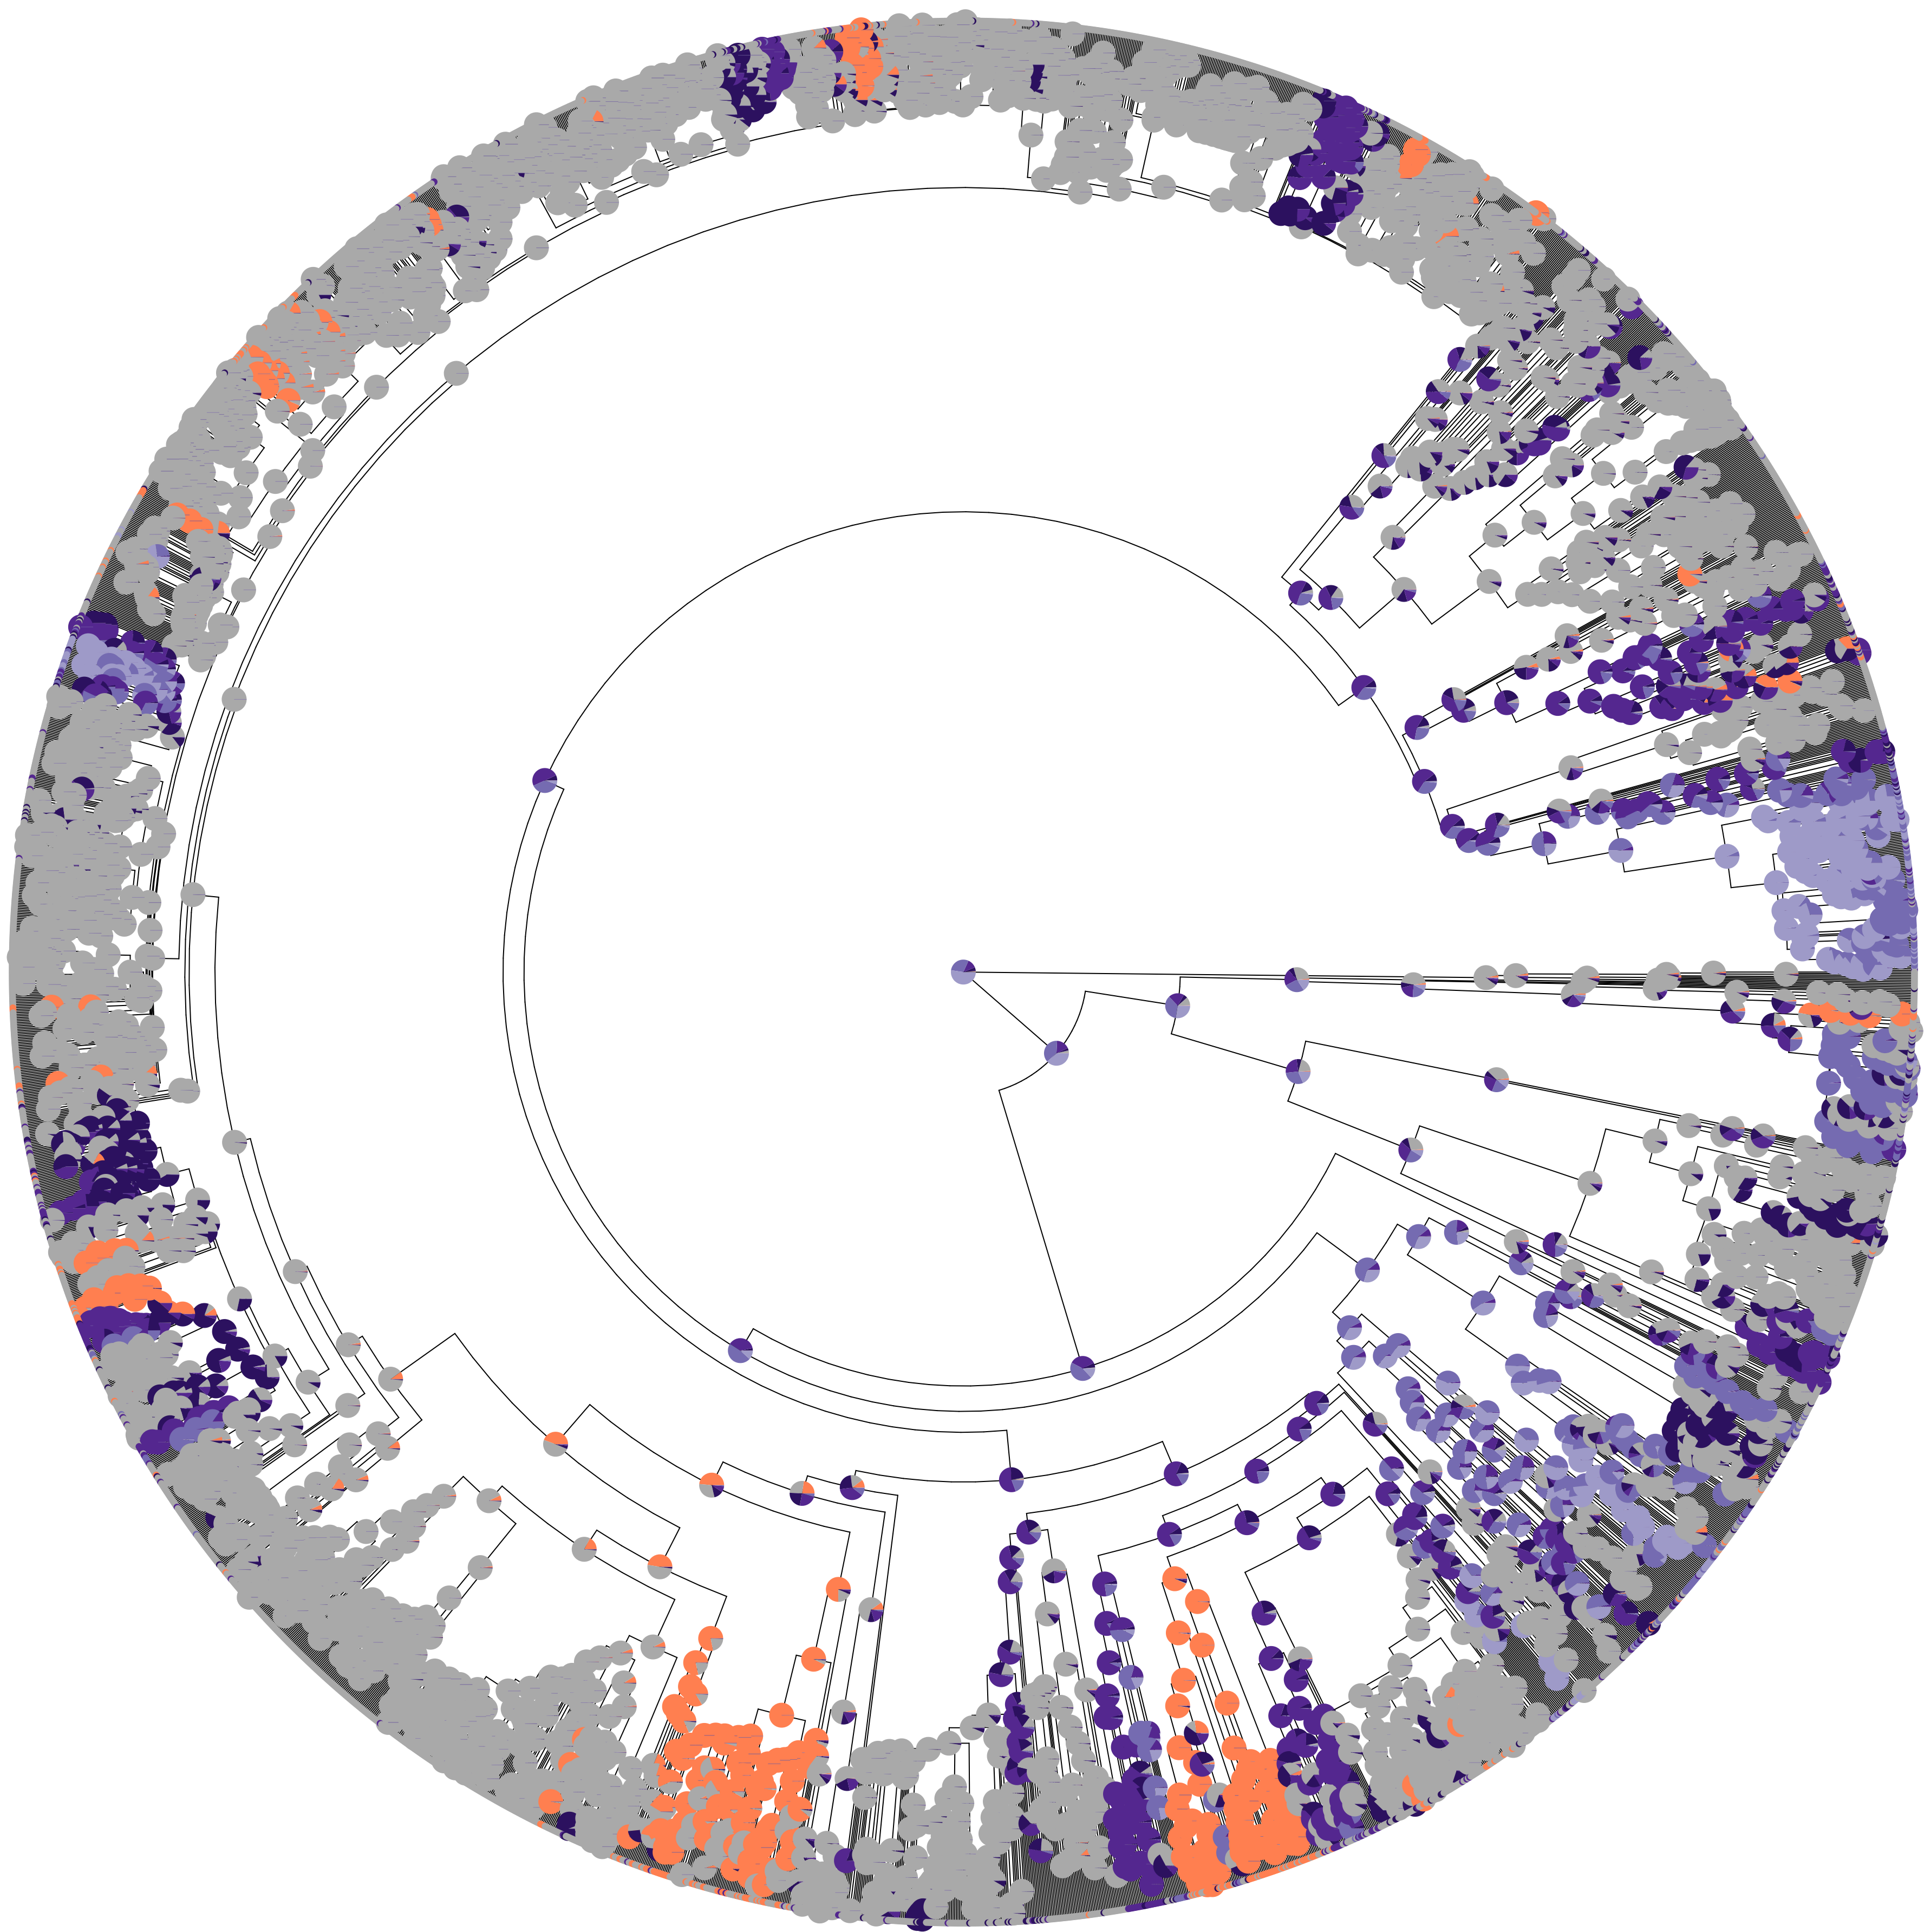

Supplement: Supplementary file 32 [file female_pert_wings.pdf › supp_3/female_pert_wings.pdf]

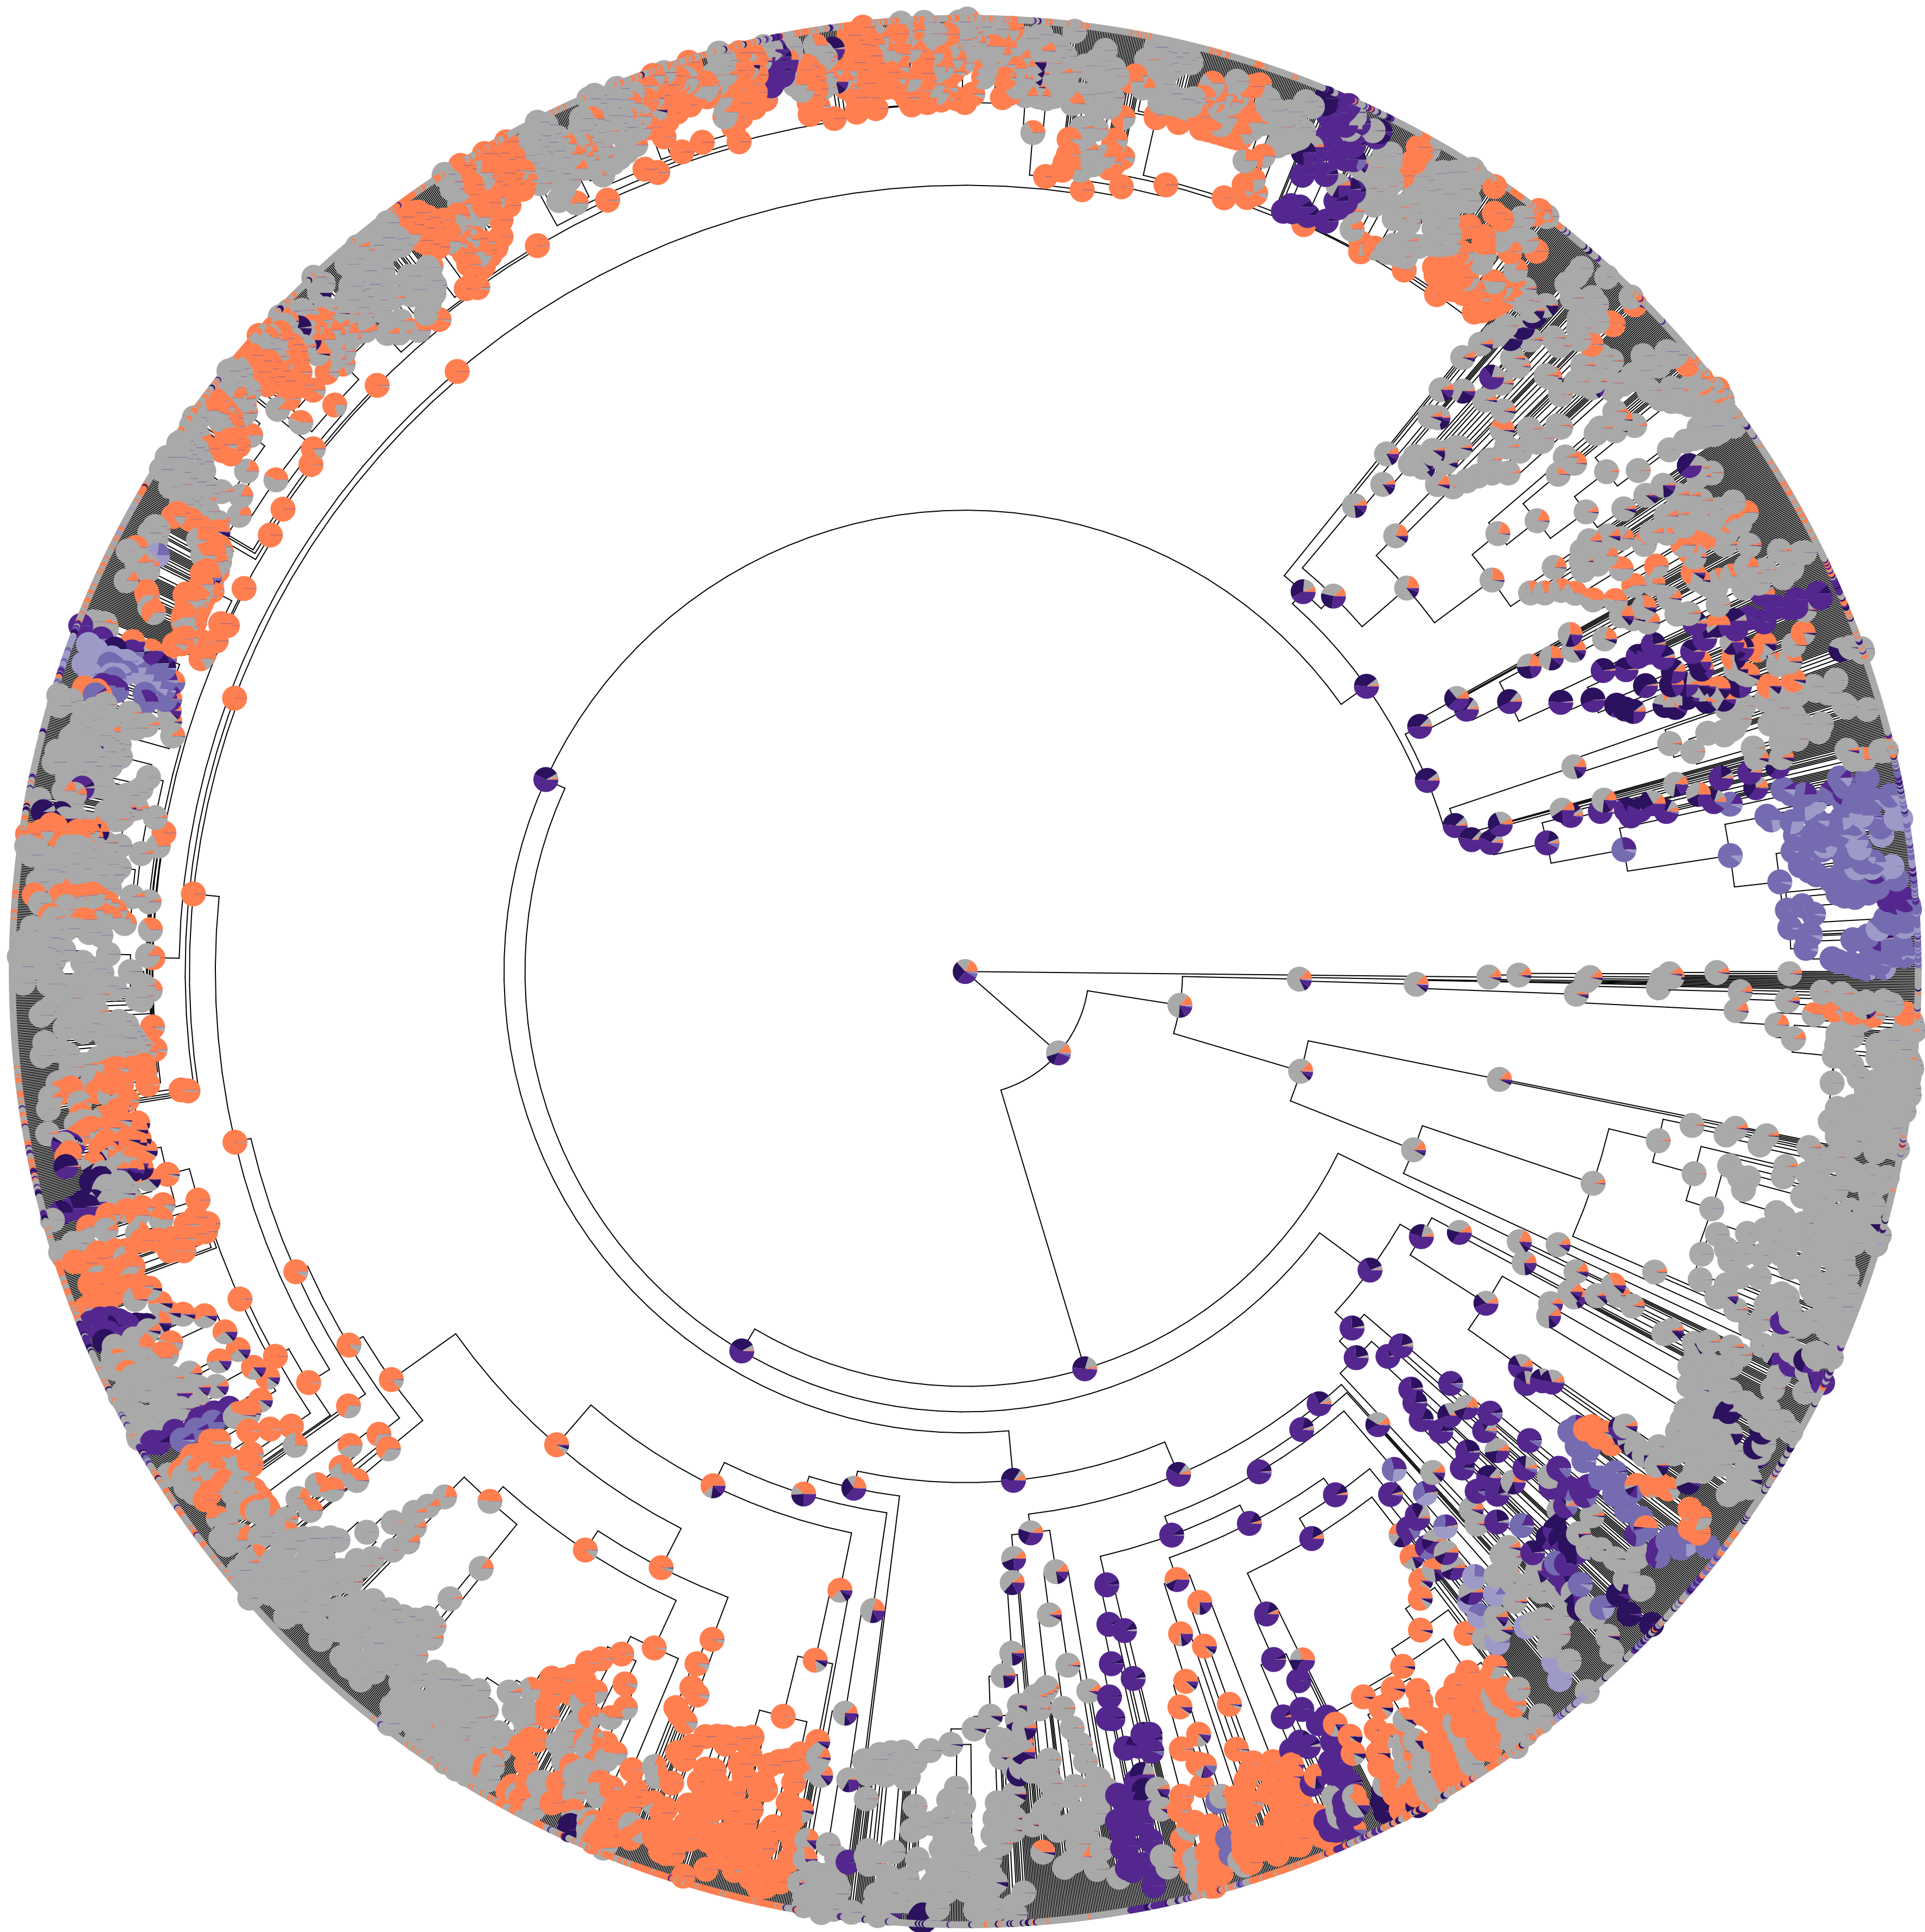

Supplement: Supplementary file 33 [file female_rump.pdf › supp_3/female_rump.pdf]

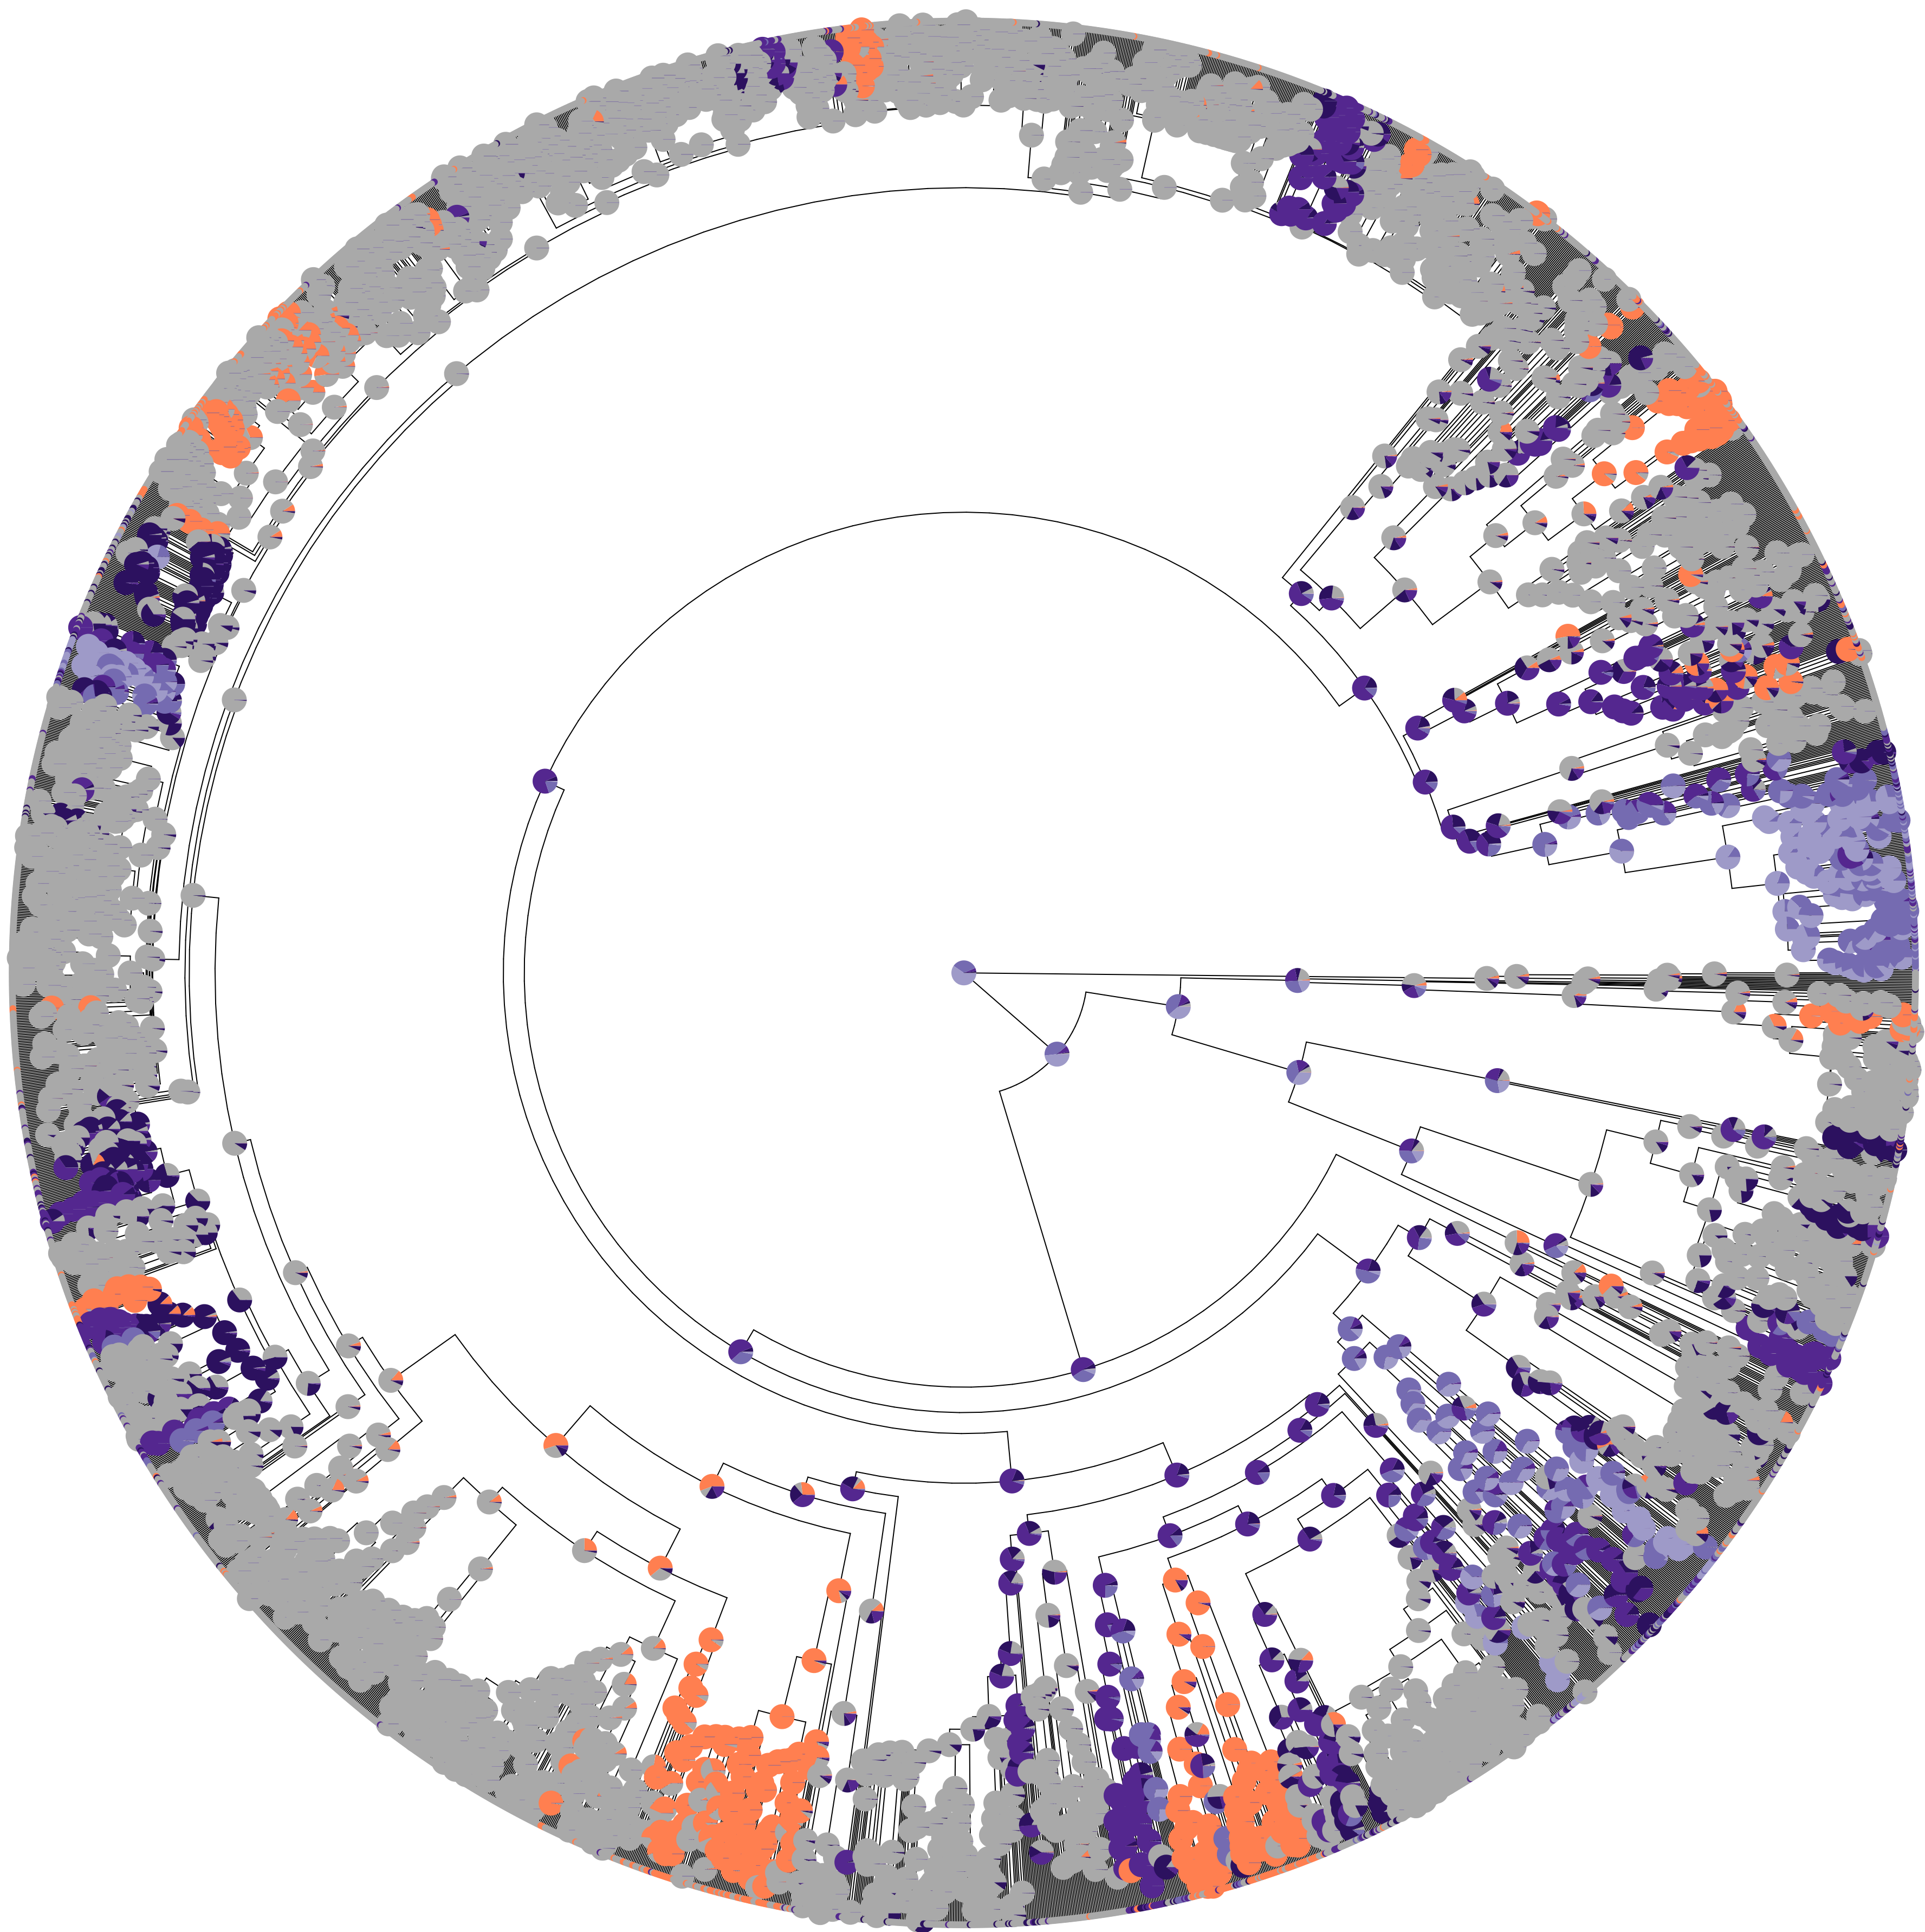

Supplement: Supplementary file 34 [file female_tail.pdf › supp_3/female_tail.pdf]

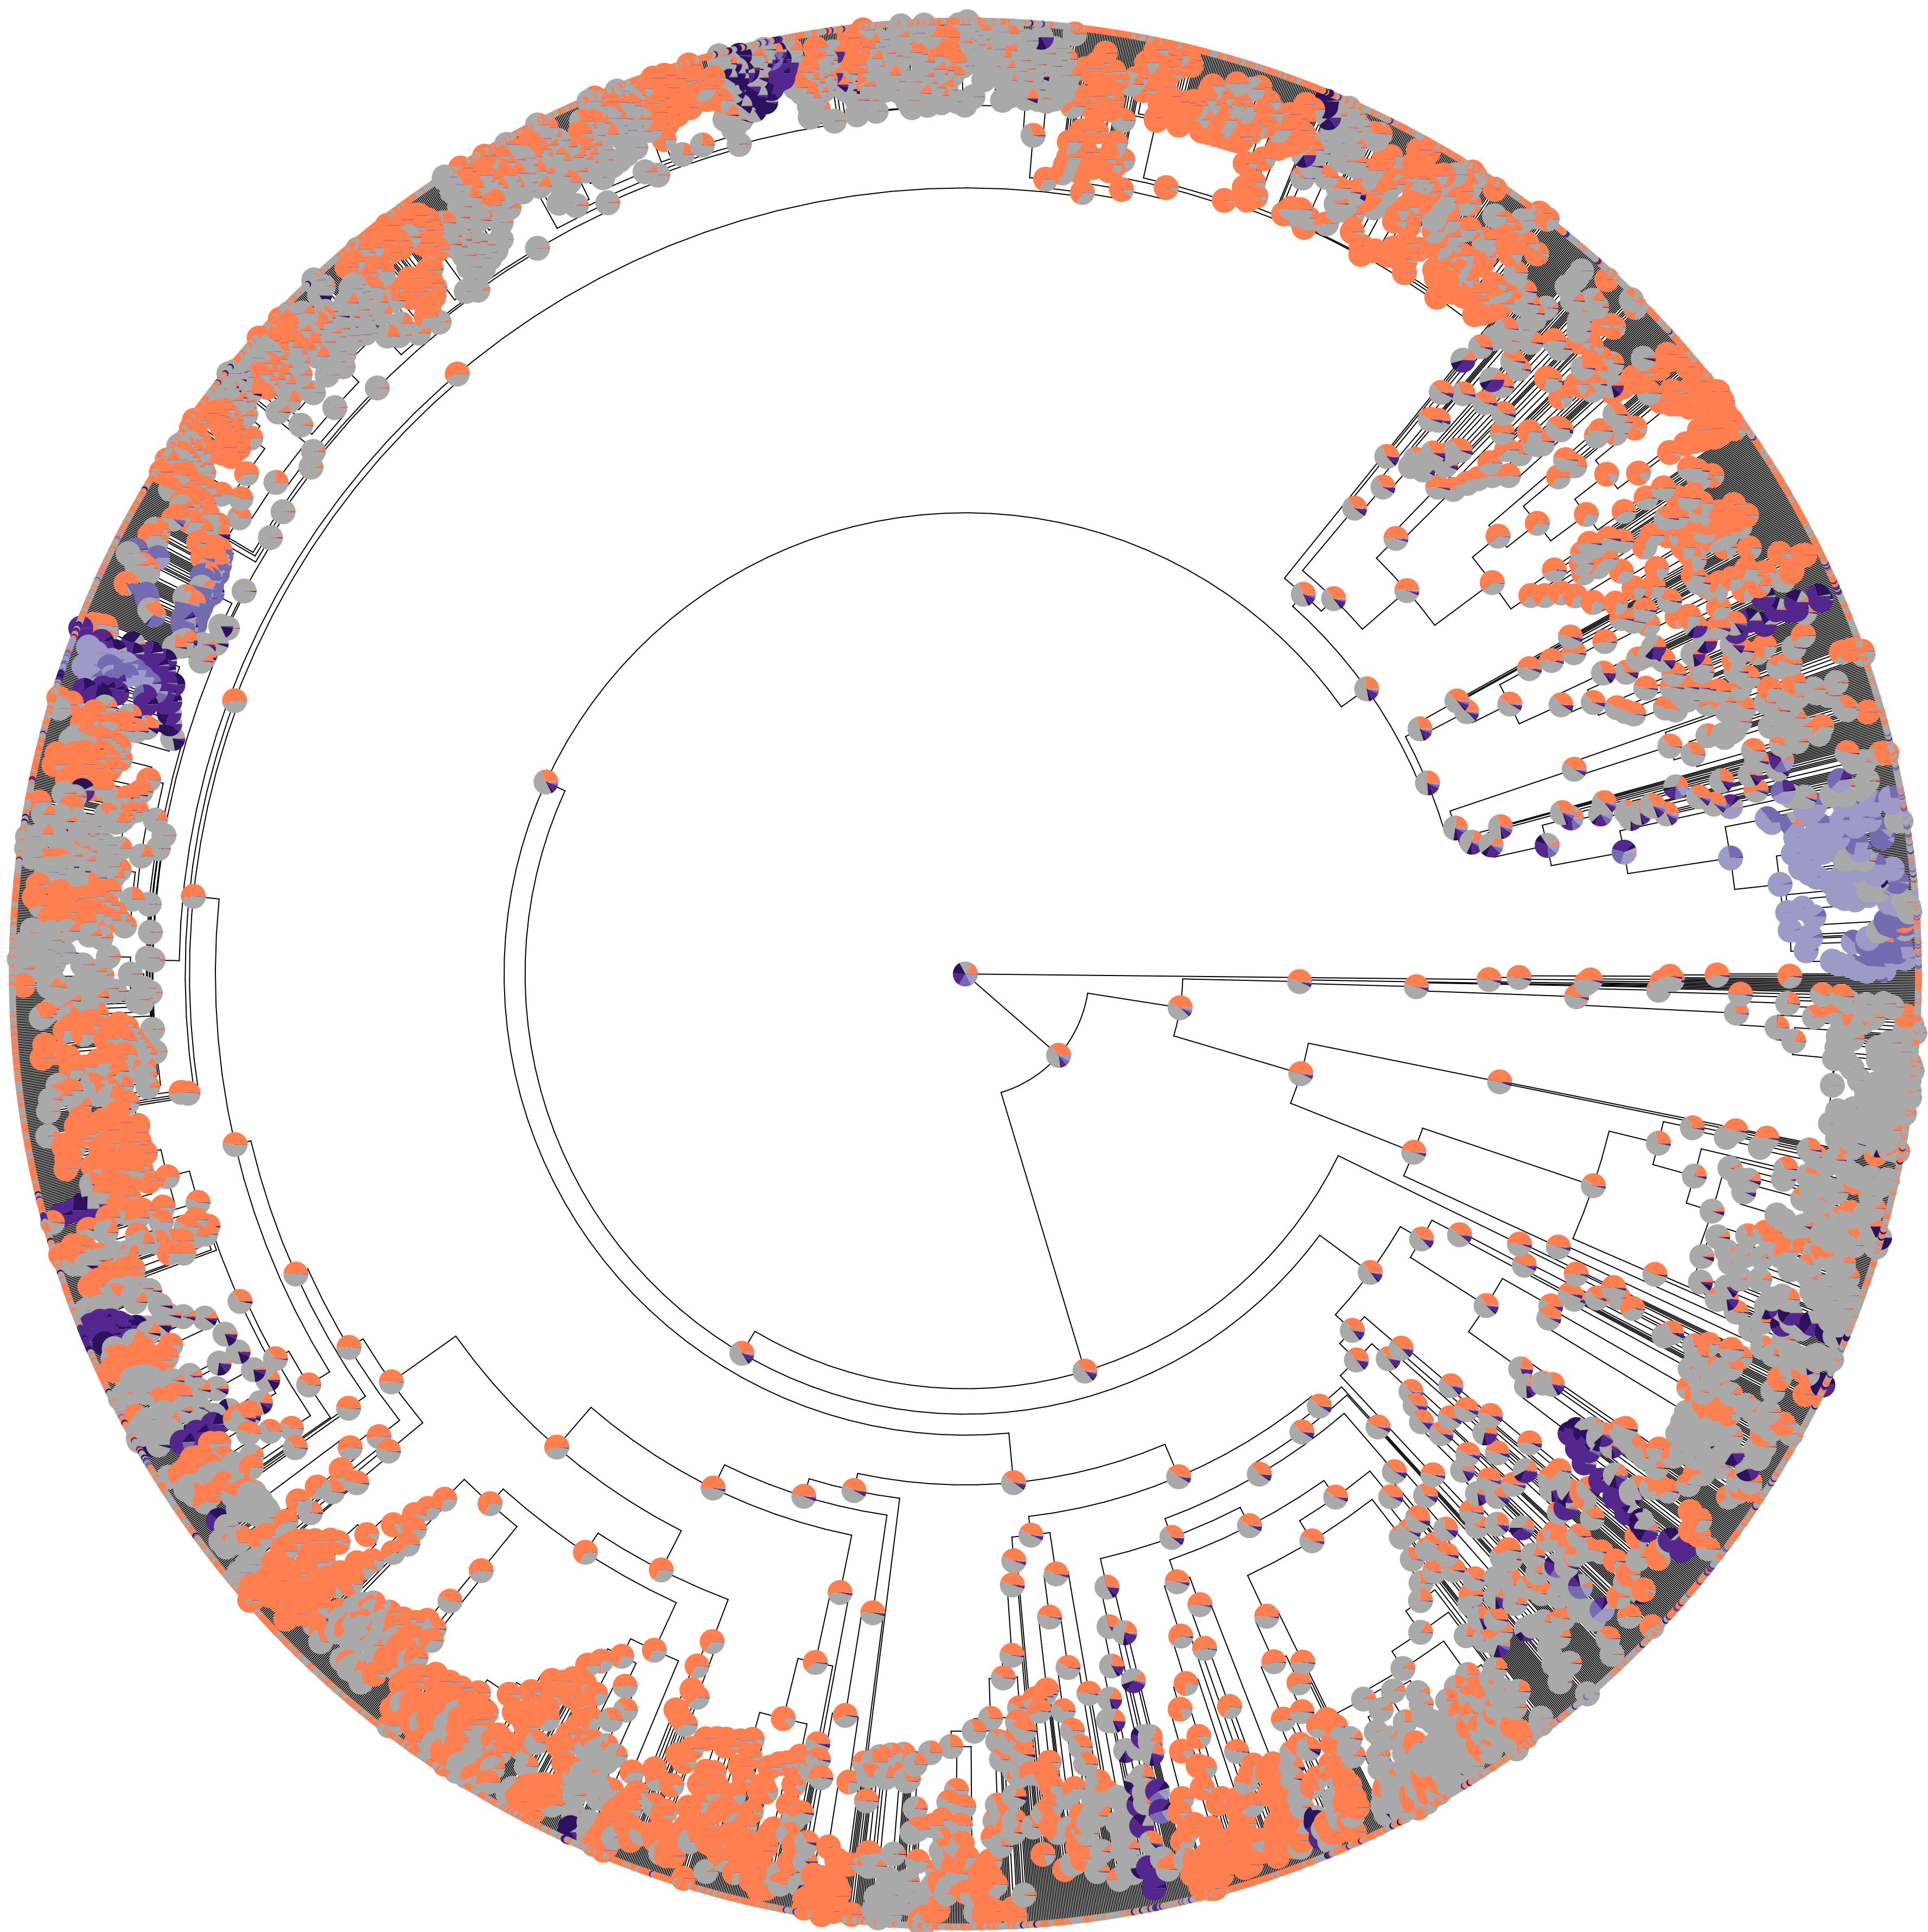

Supplement: Supplementary file 35 [file female_throat.pdf › supp_3/female_throat.pdf]

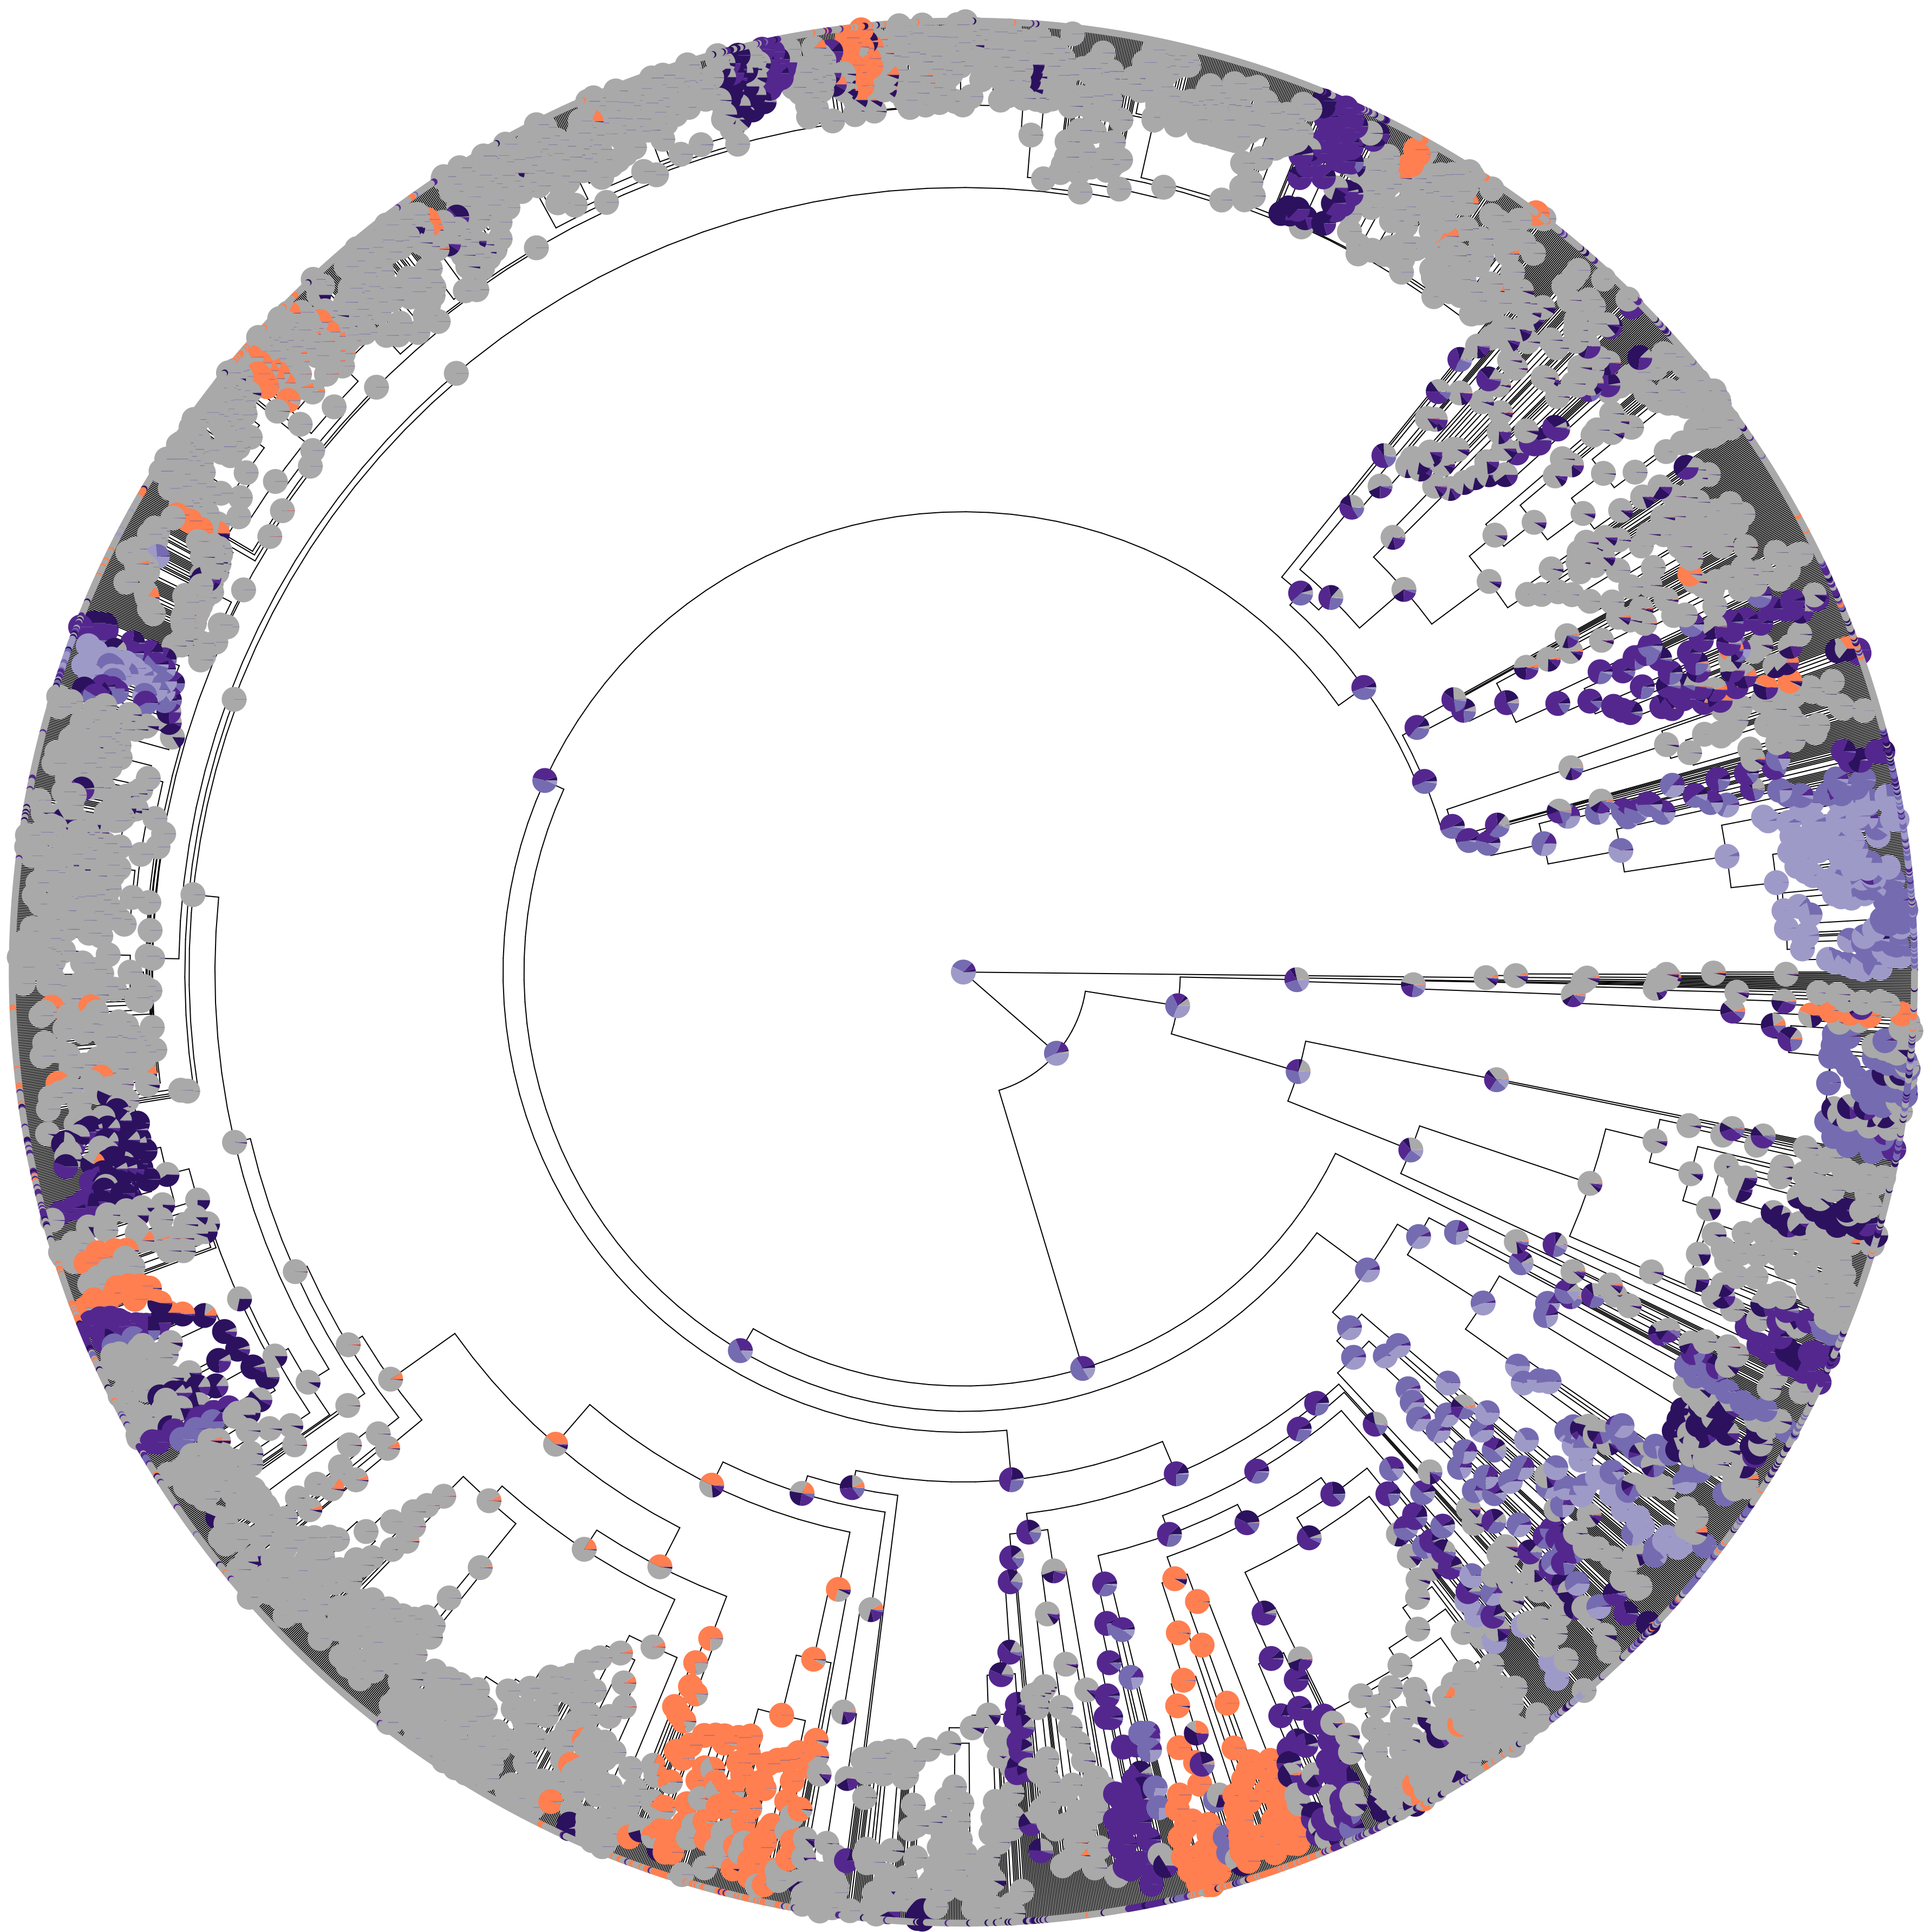

Supplement: Supplementary file 36 [file female_wings.pdf › supp_3/female_wings.pdf]

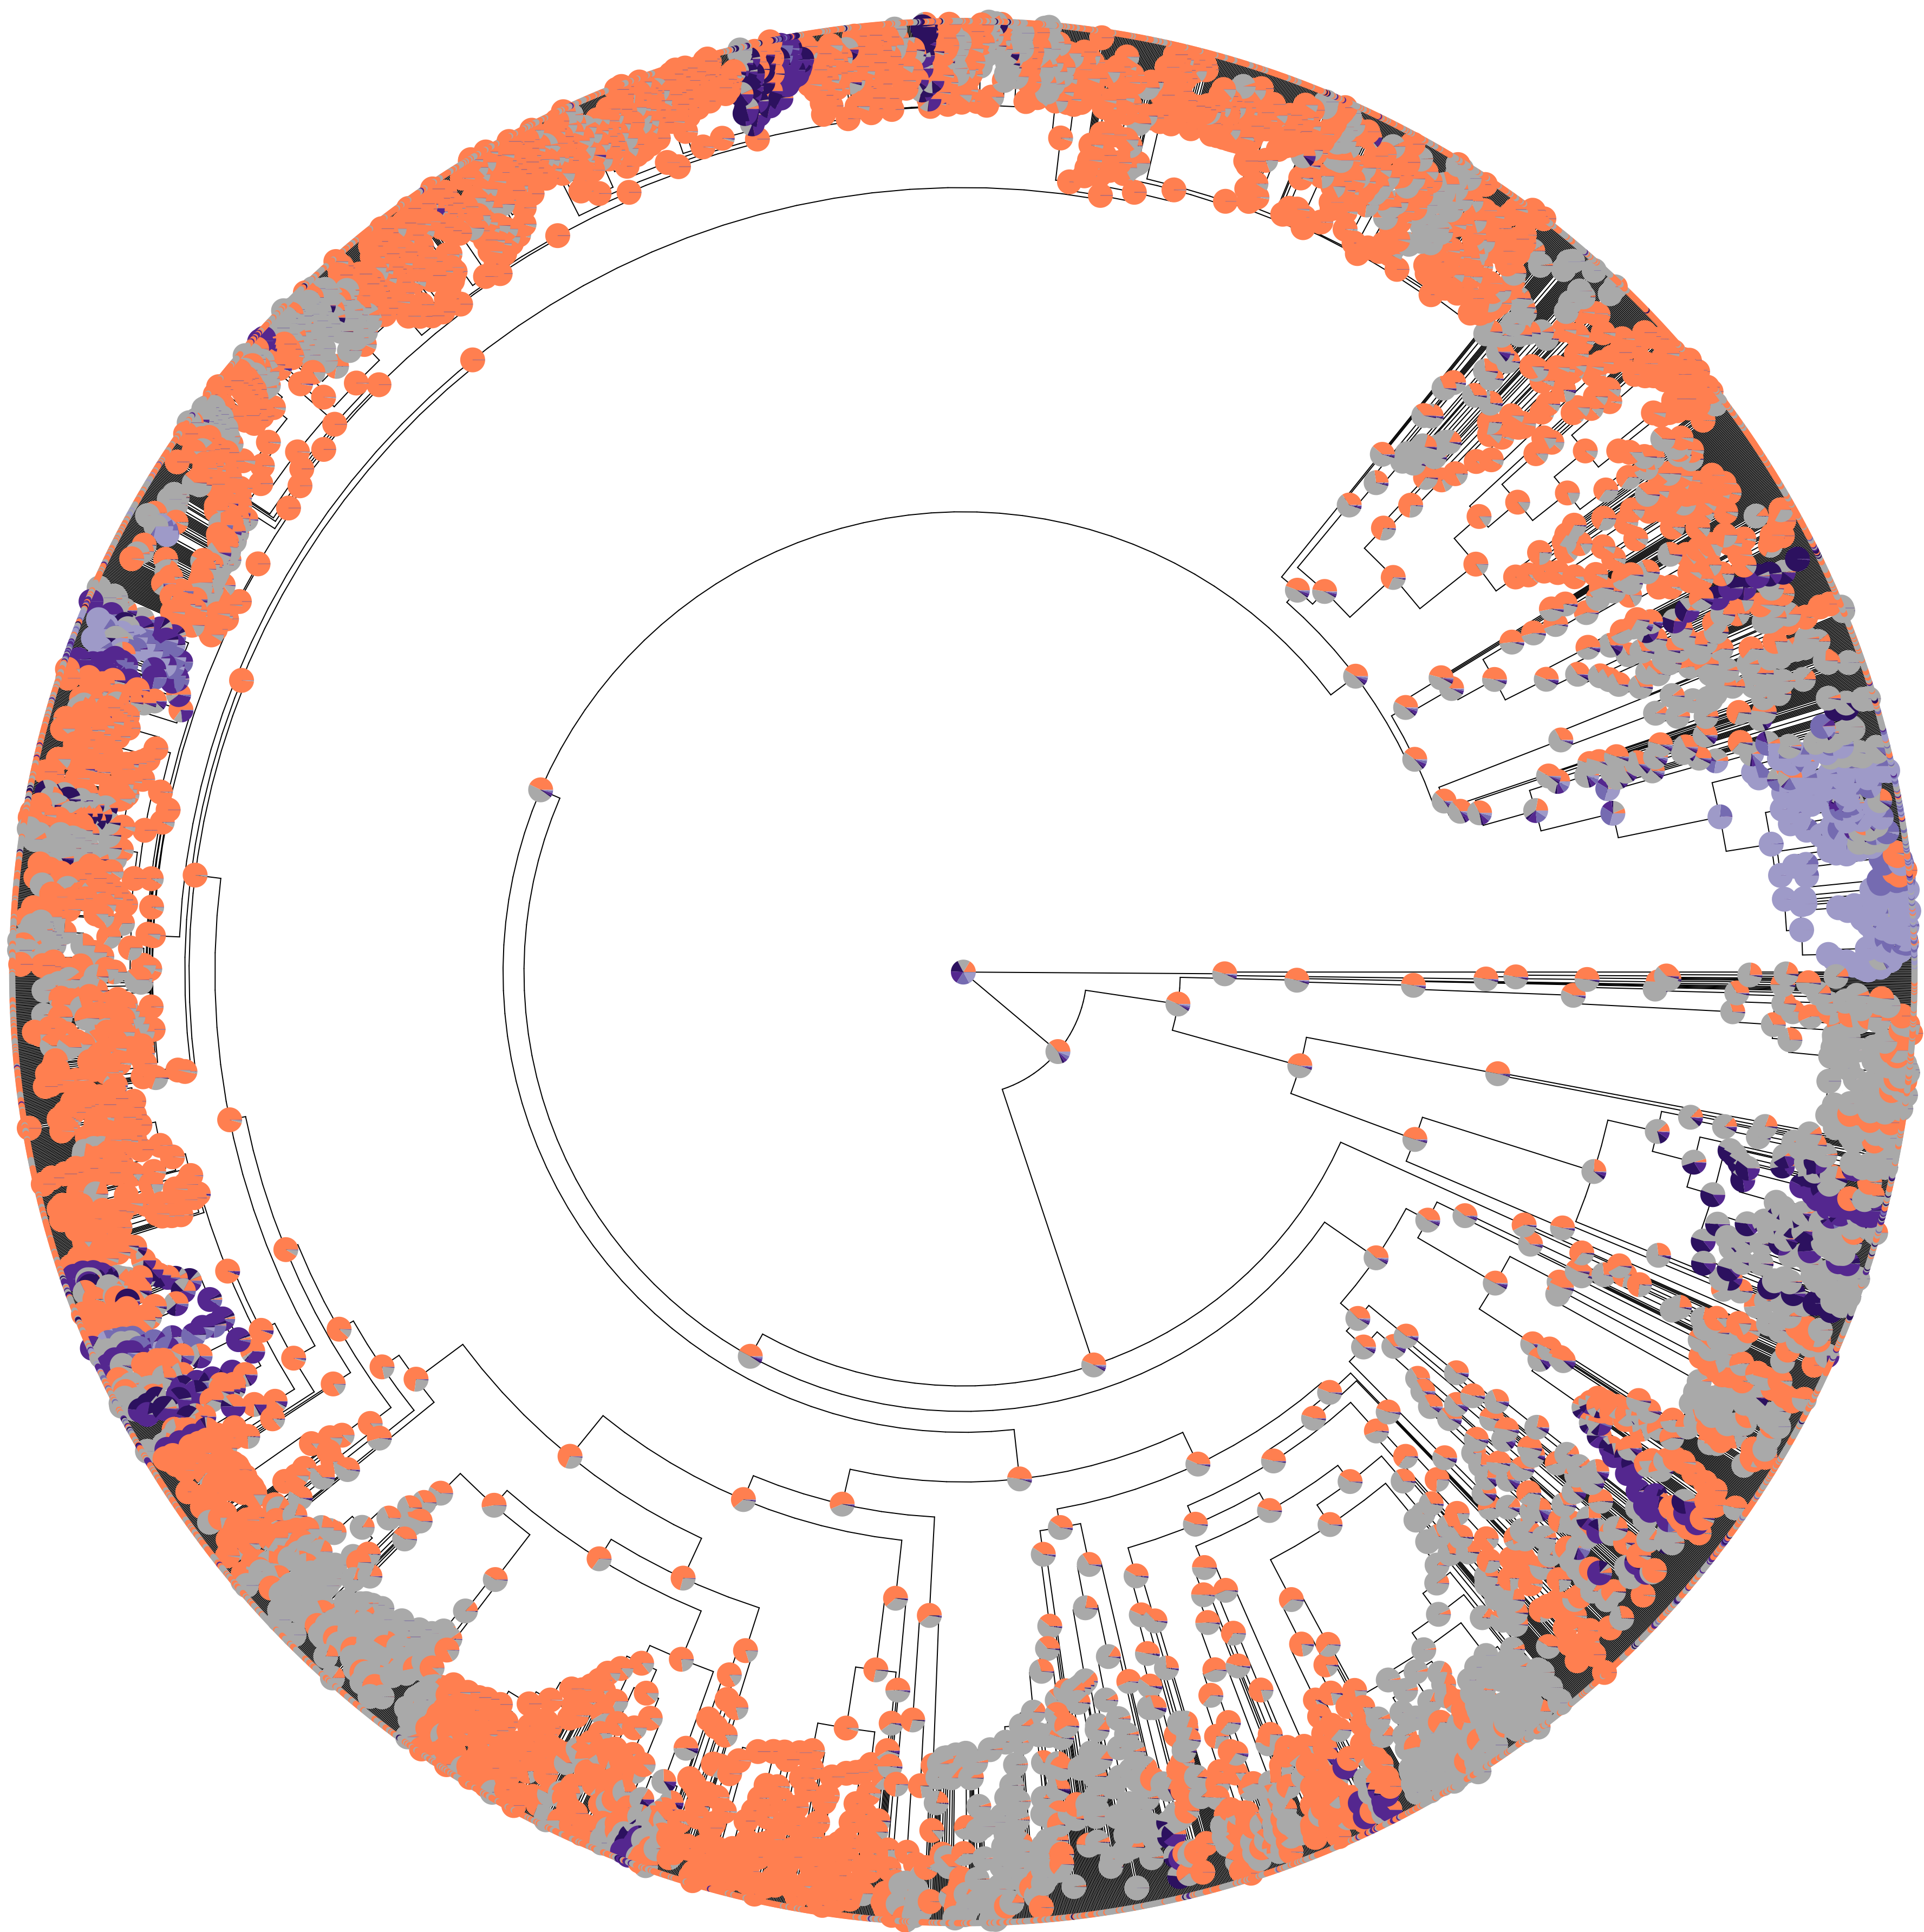

Supplement: Supplementary file 37 [file male_belly.pdf › supp_3/male_belly.pdf]

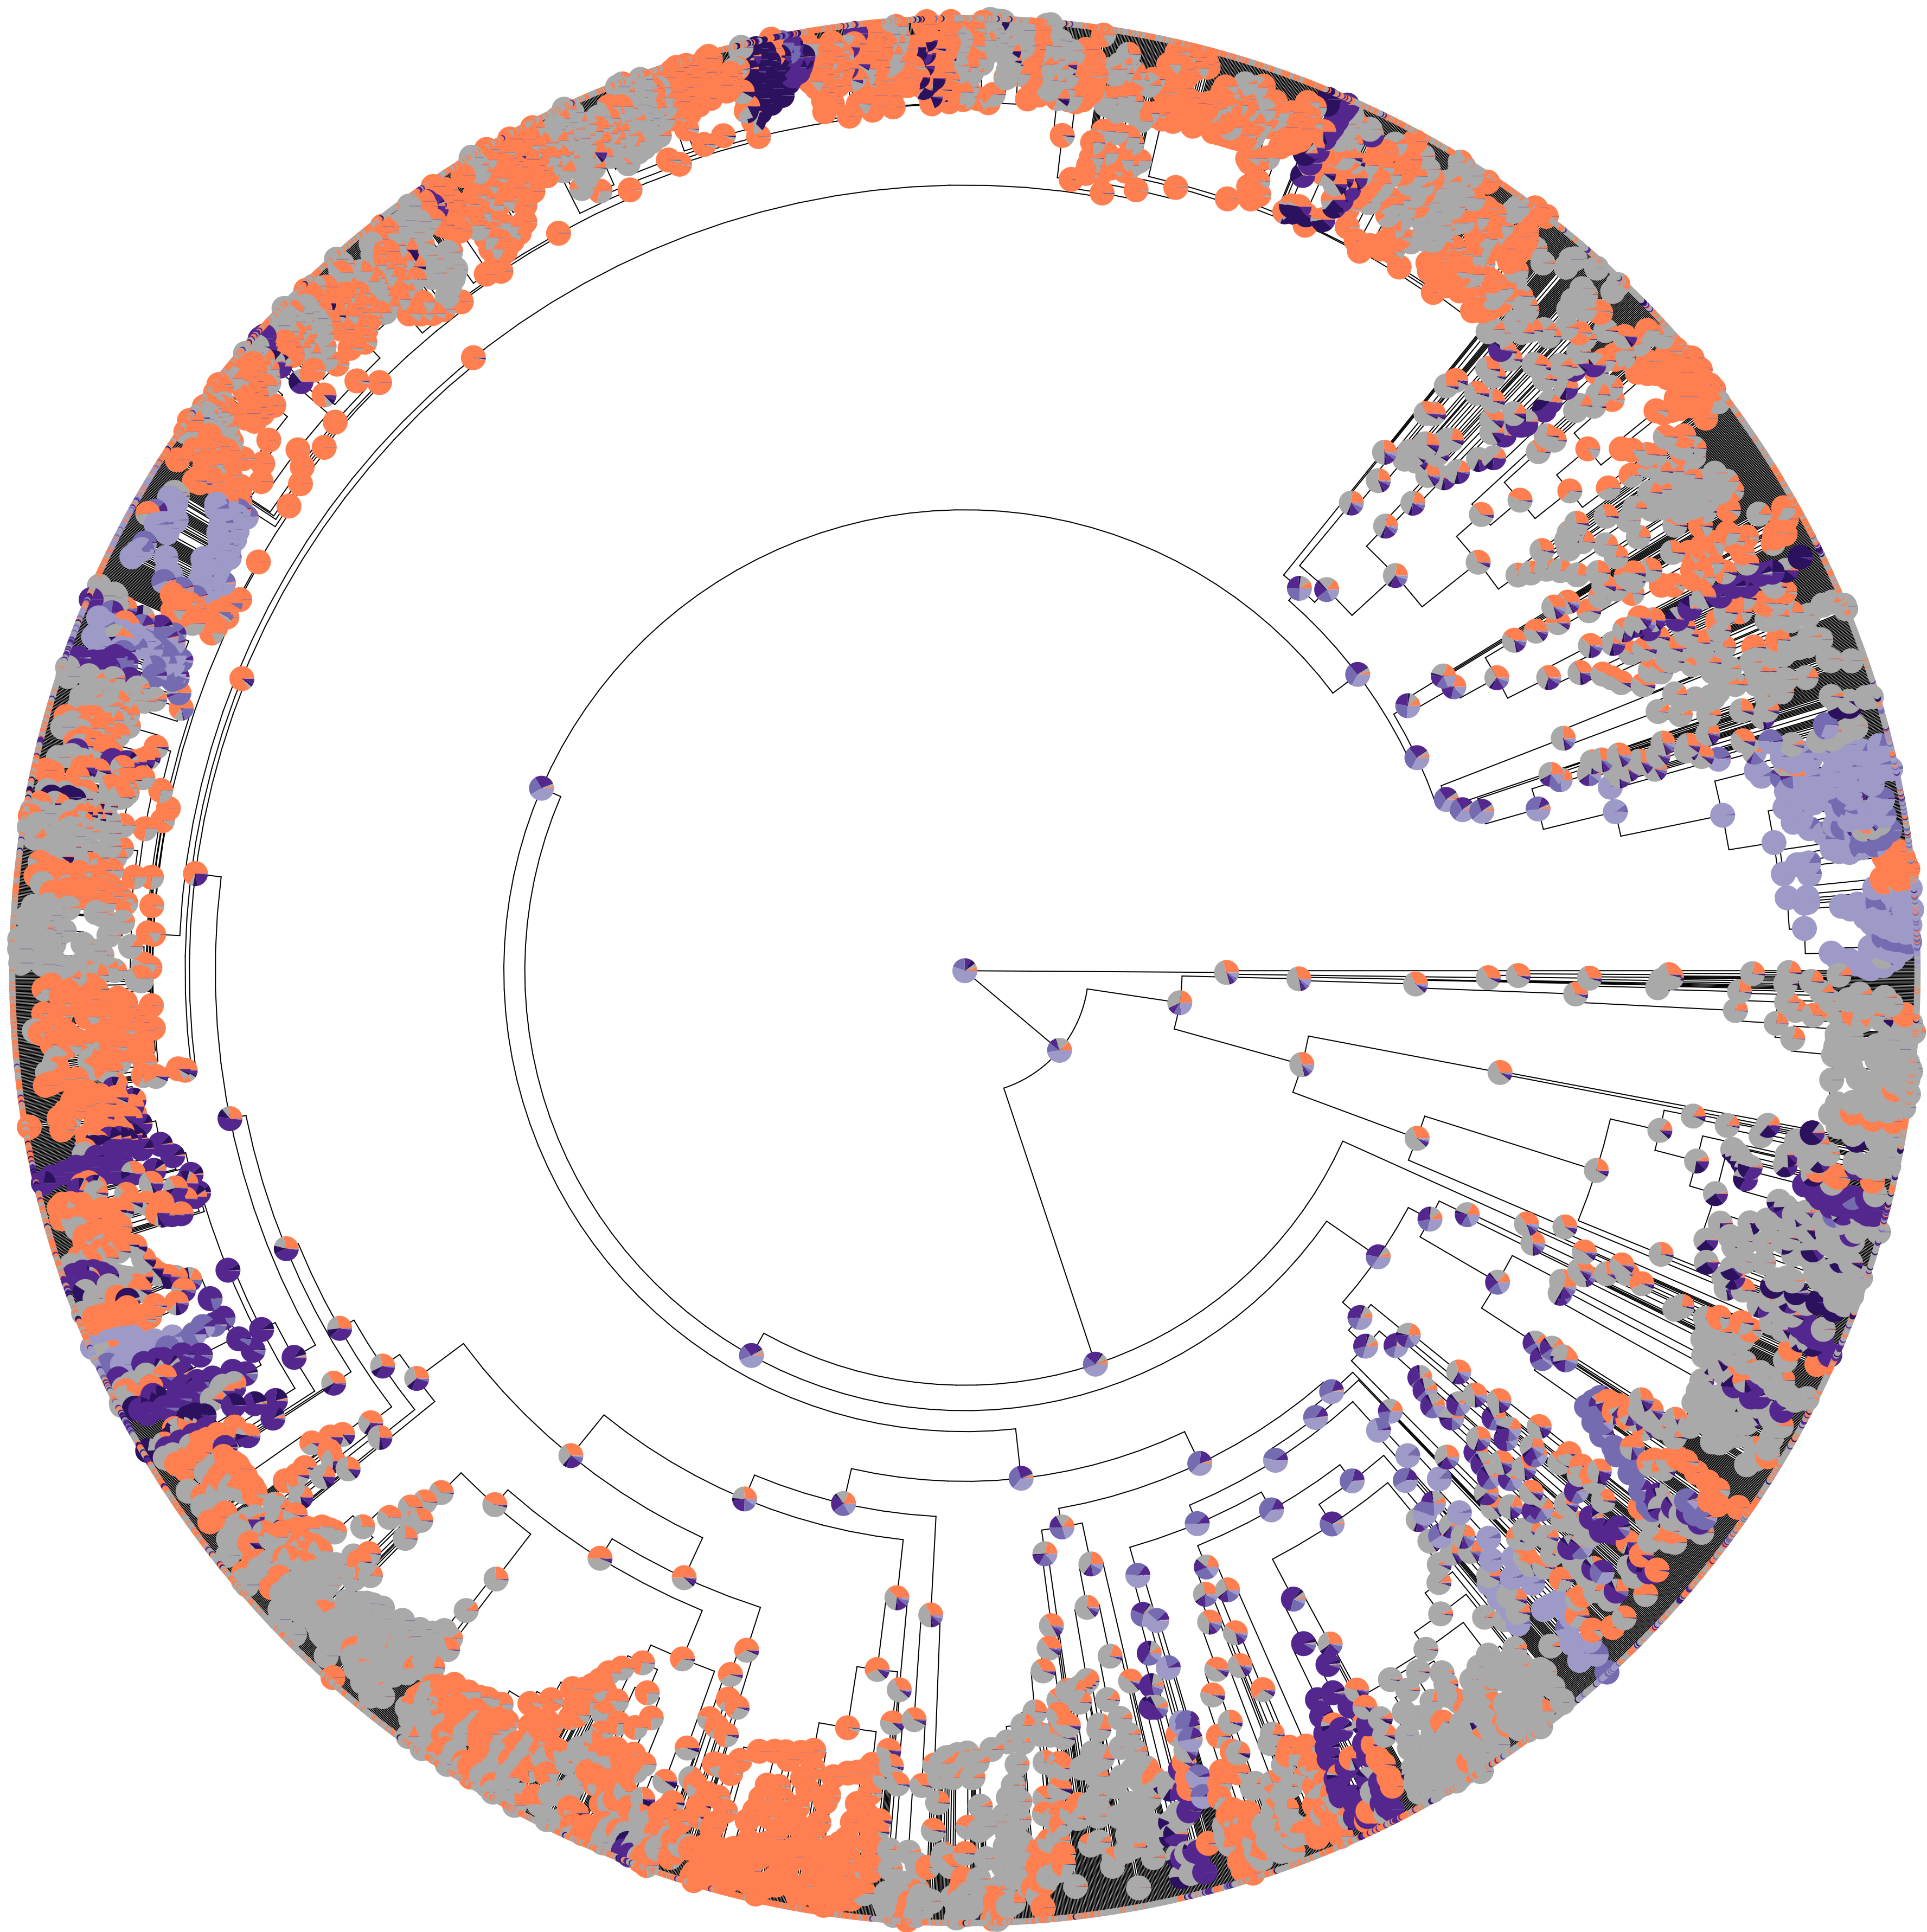

Supplement: Supplementary file 38 [file male_breast.pdf › supp_3/male_breast.pdf]

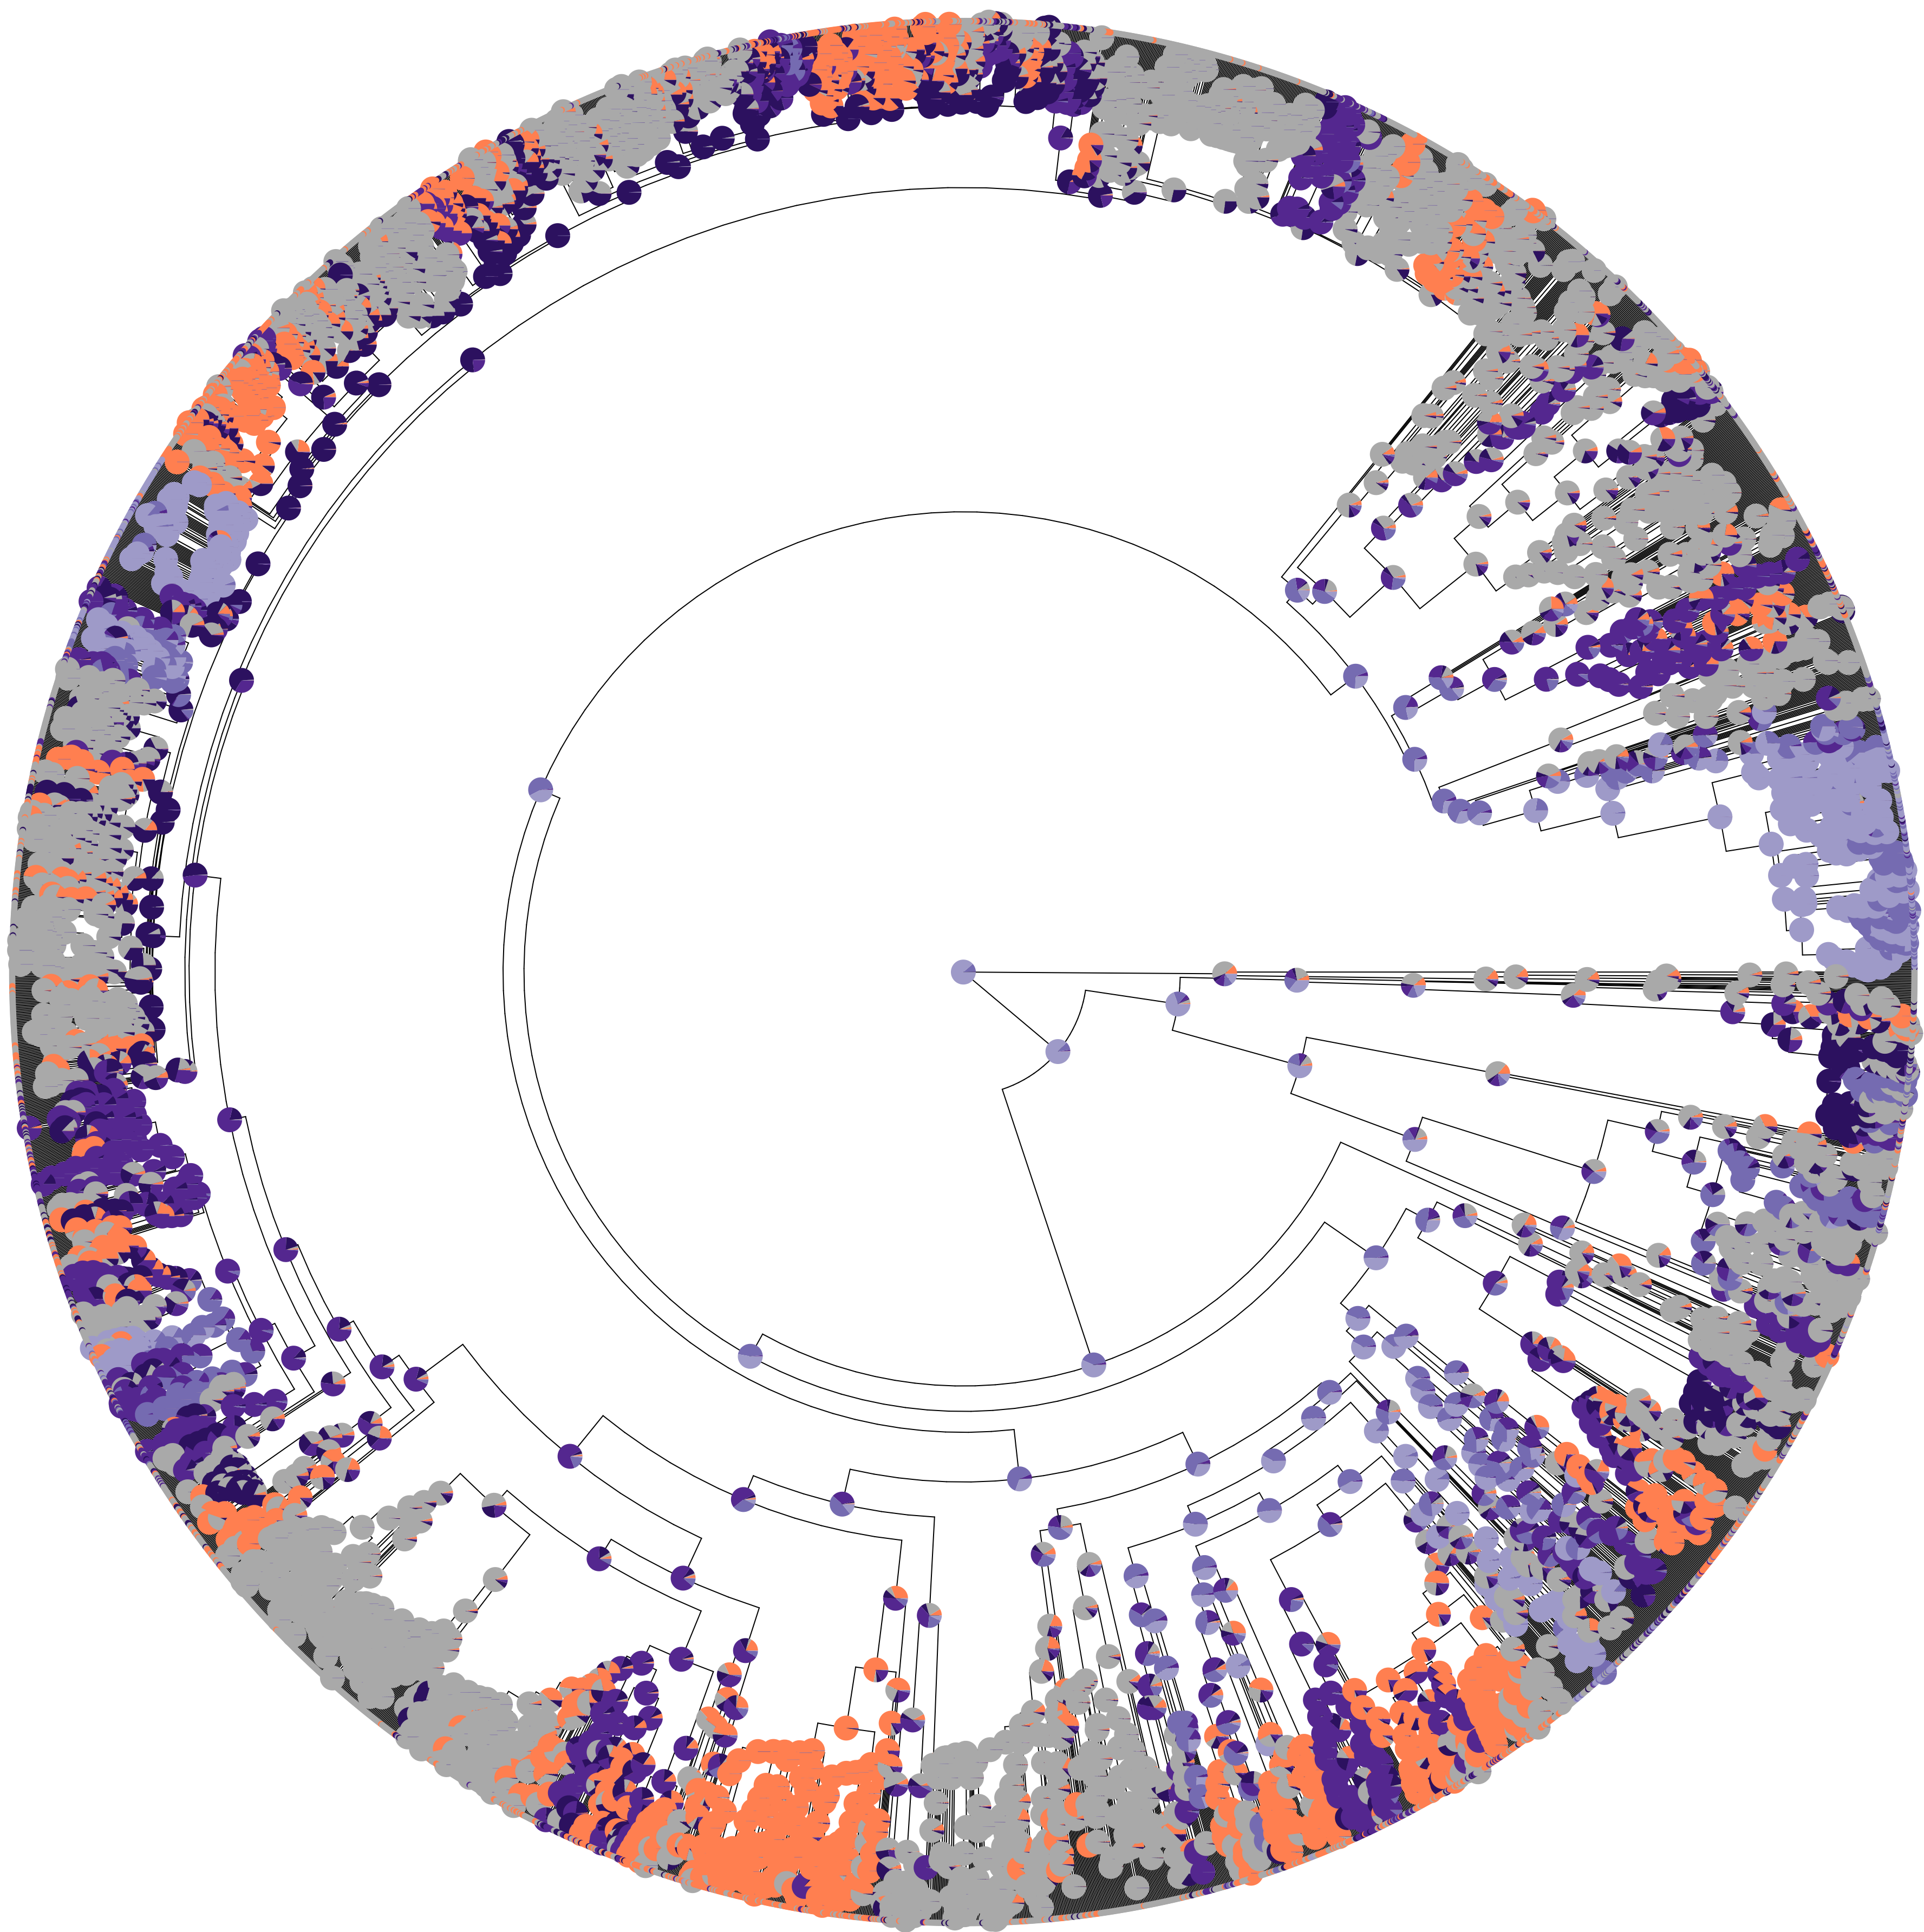

Supplement: Supplementary file 39 [file male_crown.pdf › supp_3/male_crown.pdf]

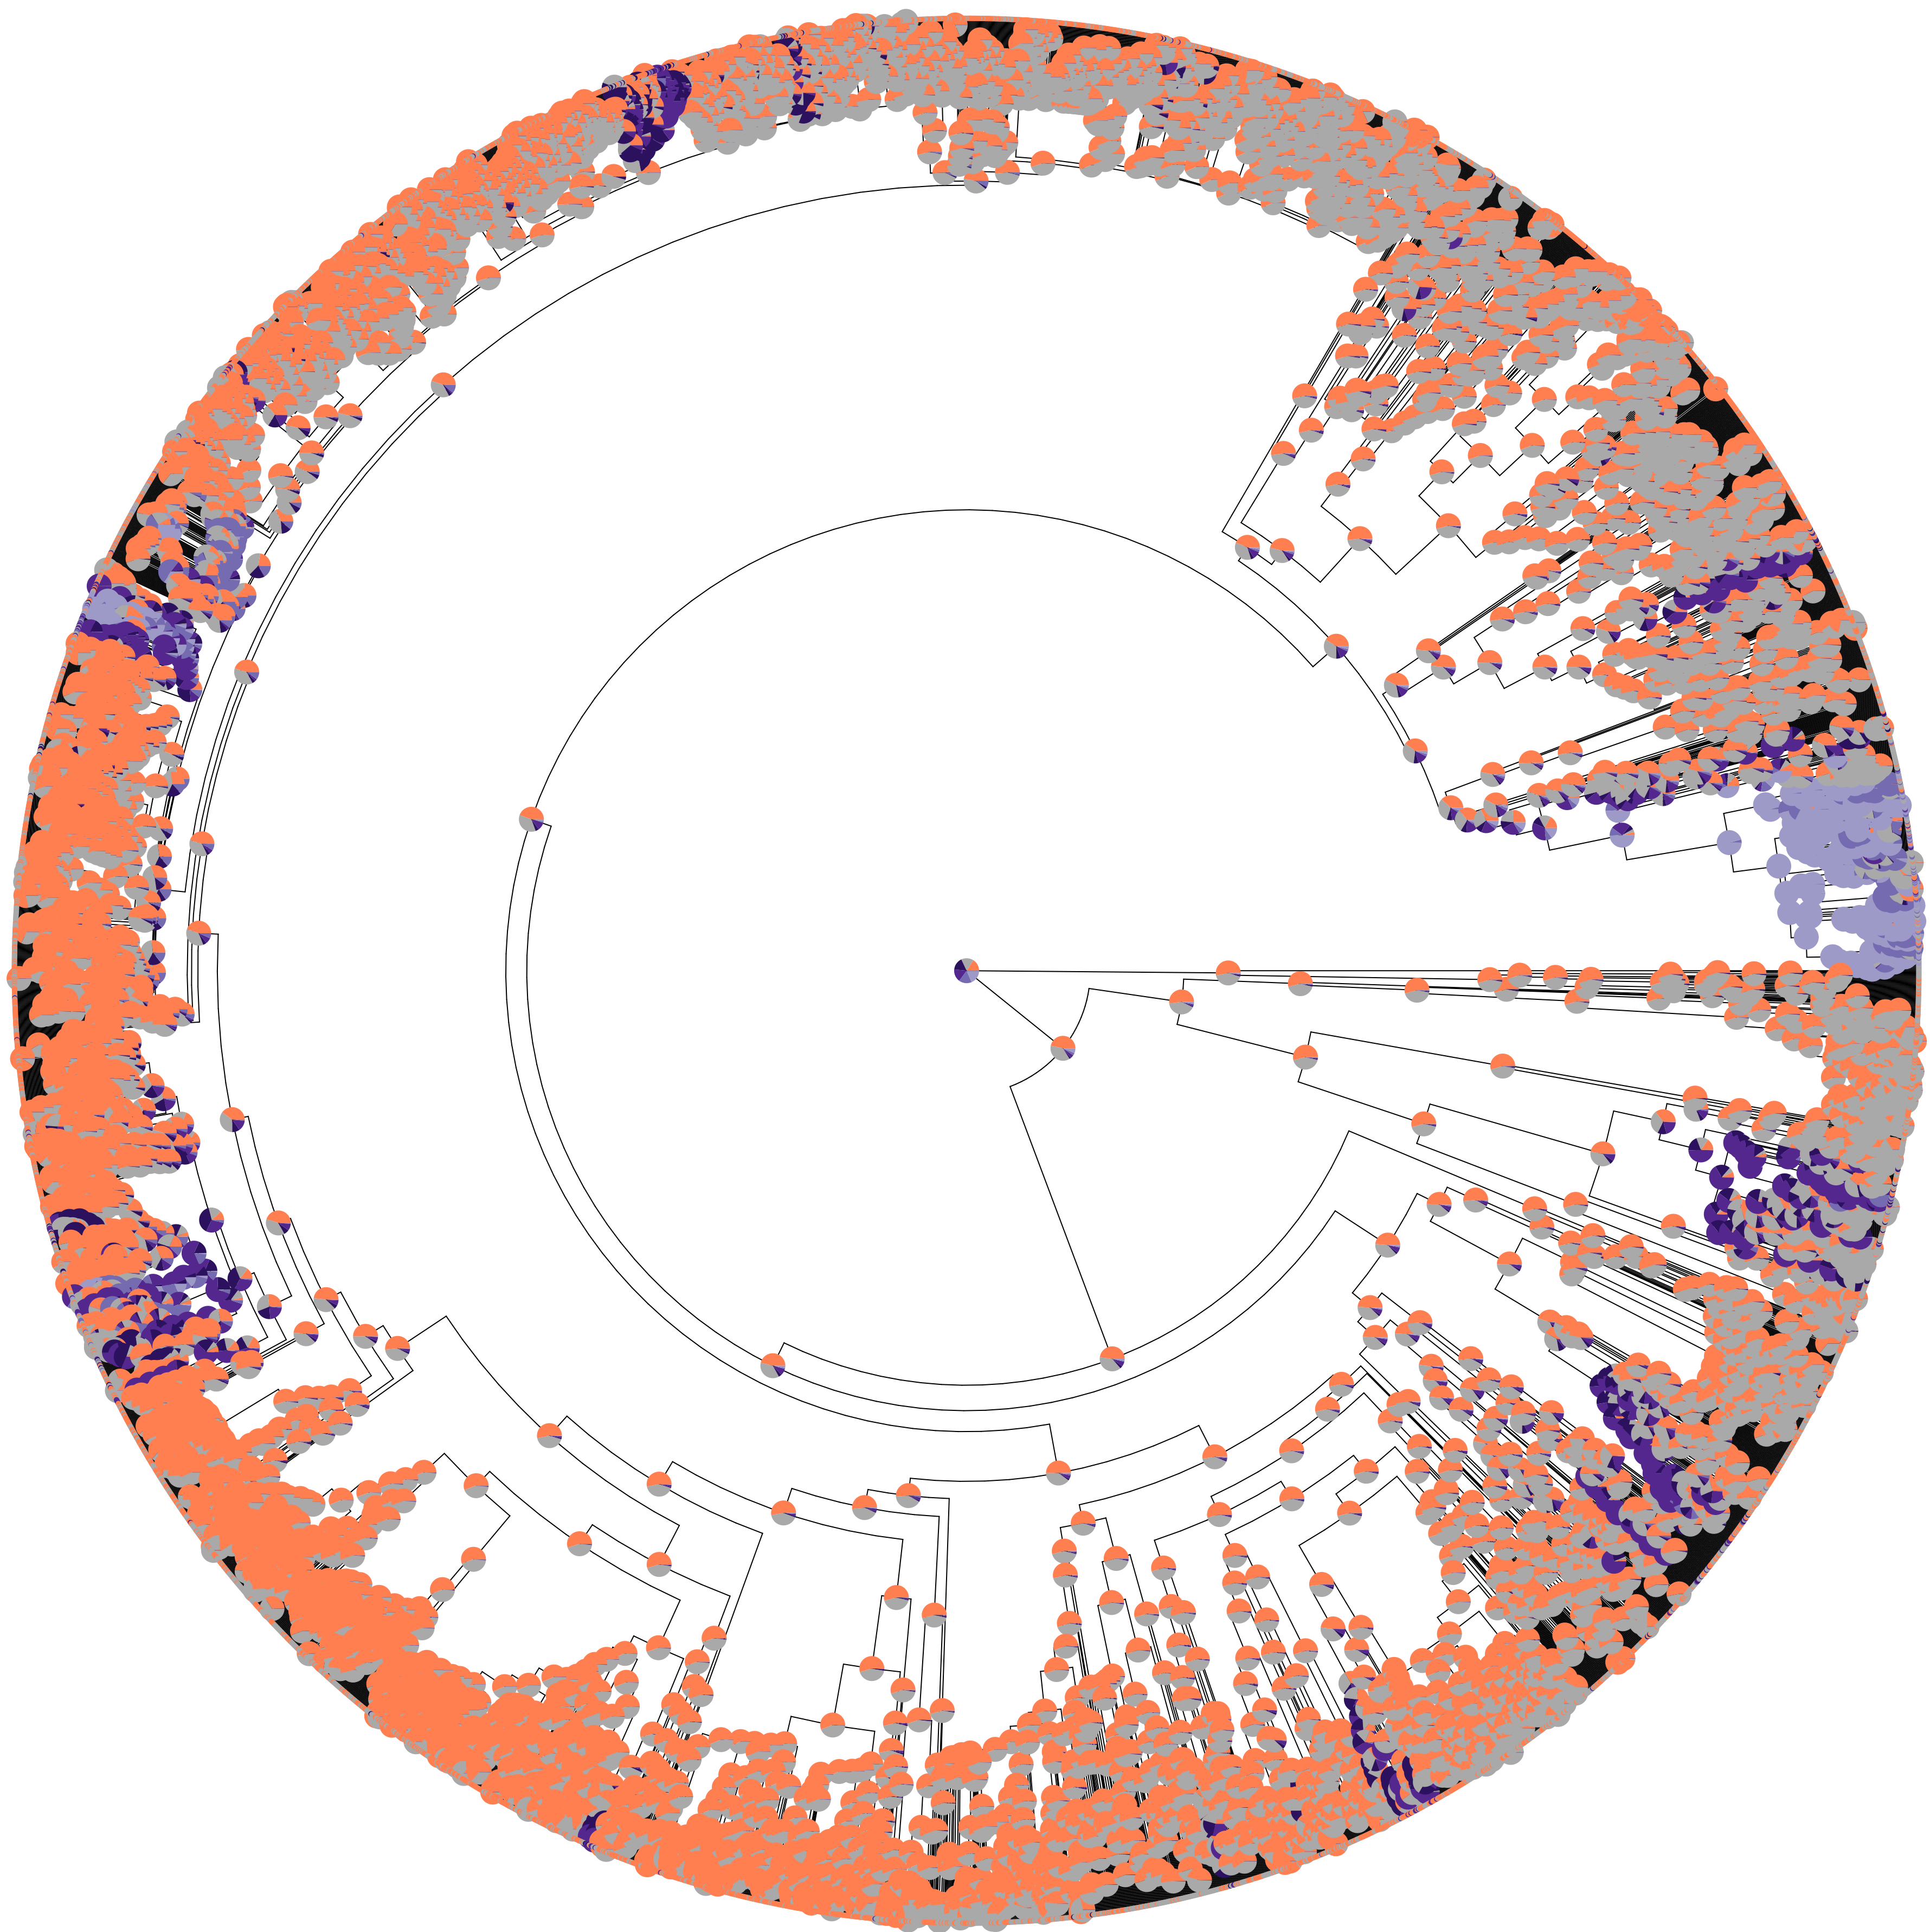

Supplement: Supplementary file 40 [file male_ext_pert_belly.pdf › supp_3/male_ext_pert_belly.pdf]

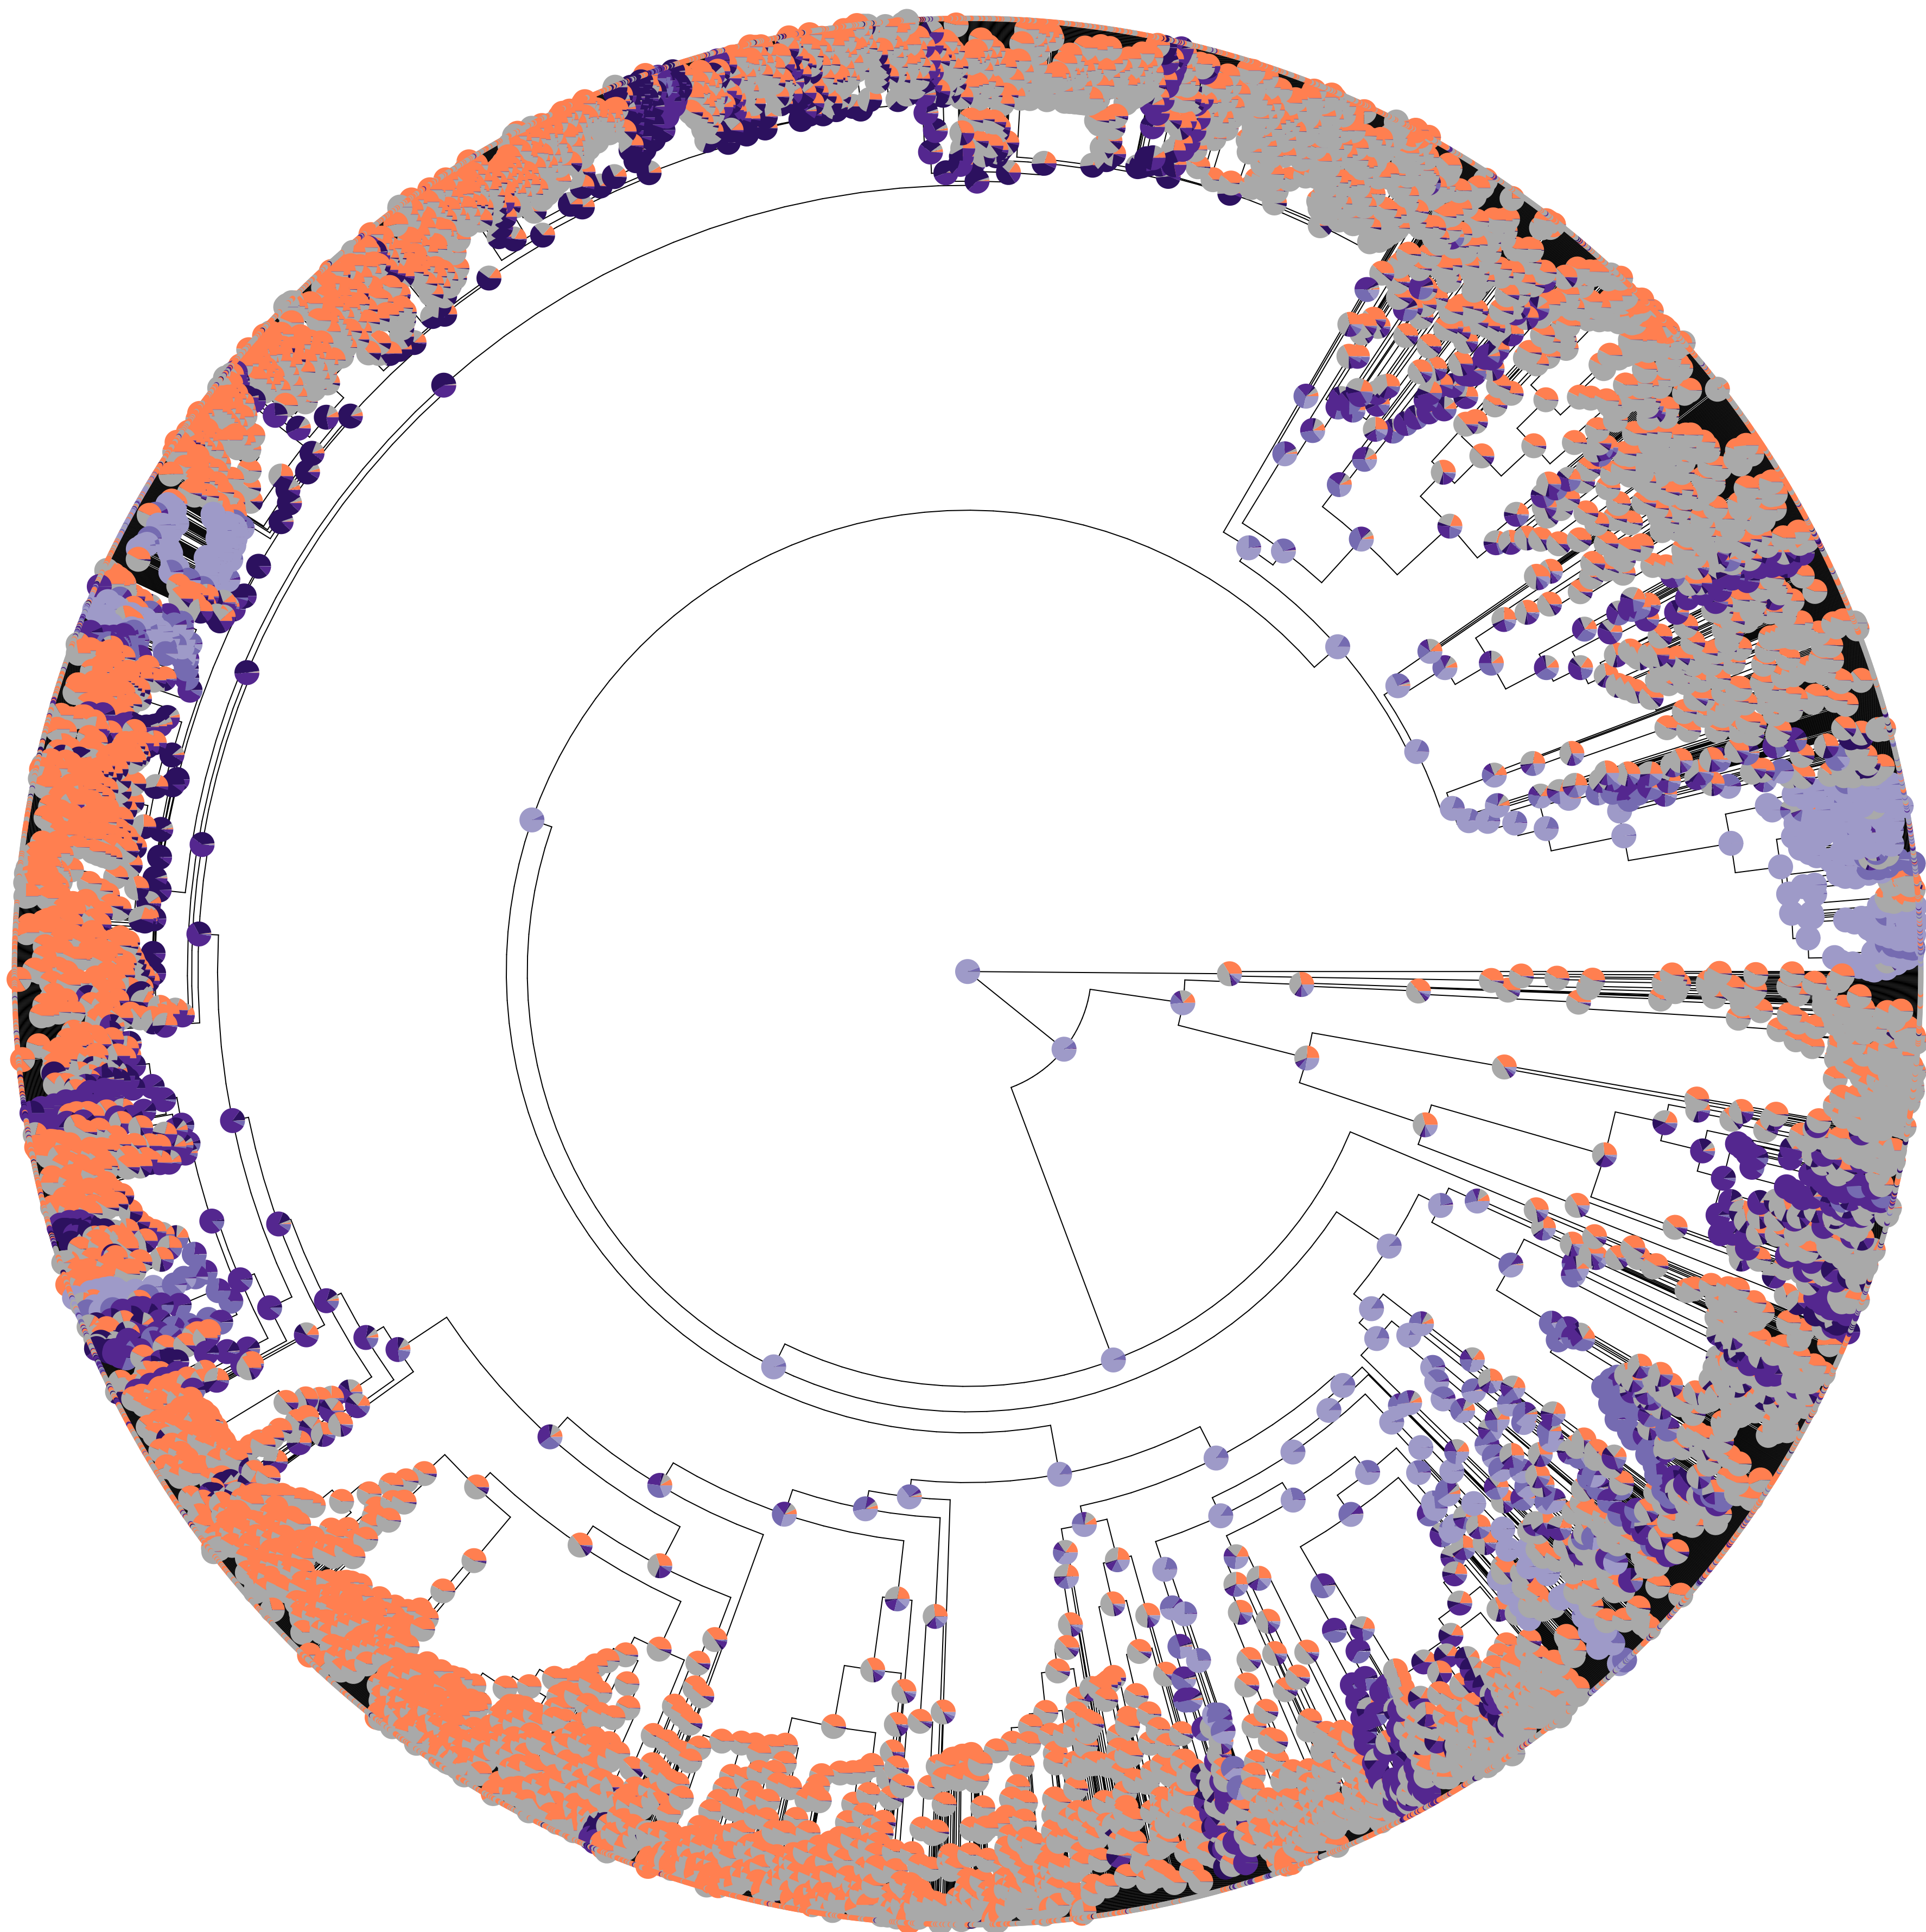

Supplement: Supplementary file 41 [file male_ext_pert_breast.pdf › supp_3/male_ext_pert_breast.pdf]



Supplement: Supplementary file 42 [file male_ext_pert_crown.pdf › supp_3/male_ext_pert_crown.pdf]

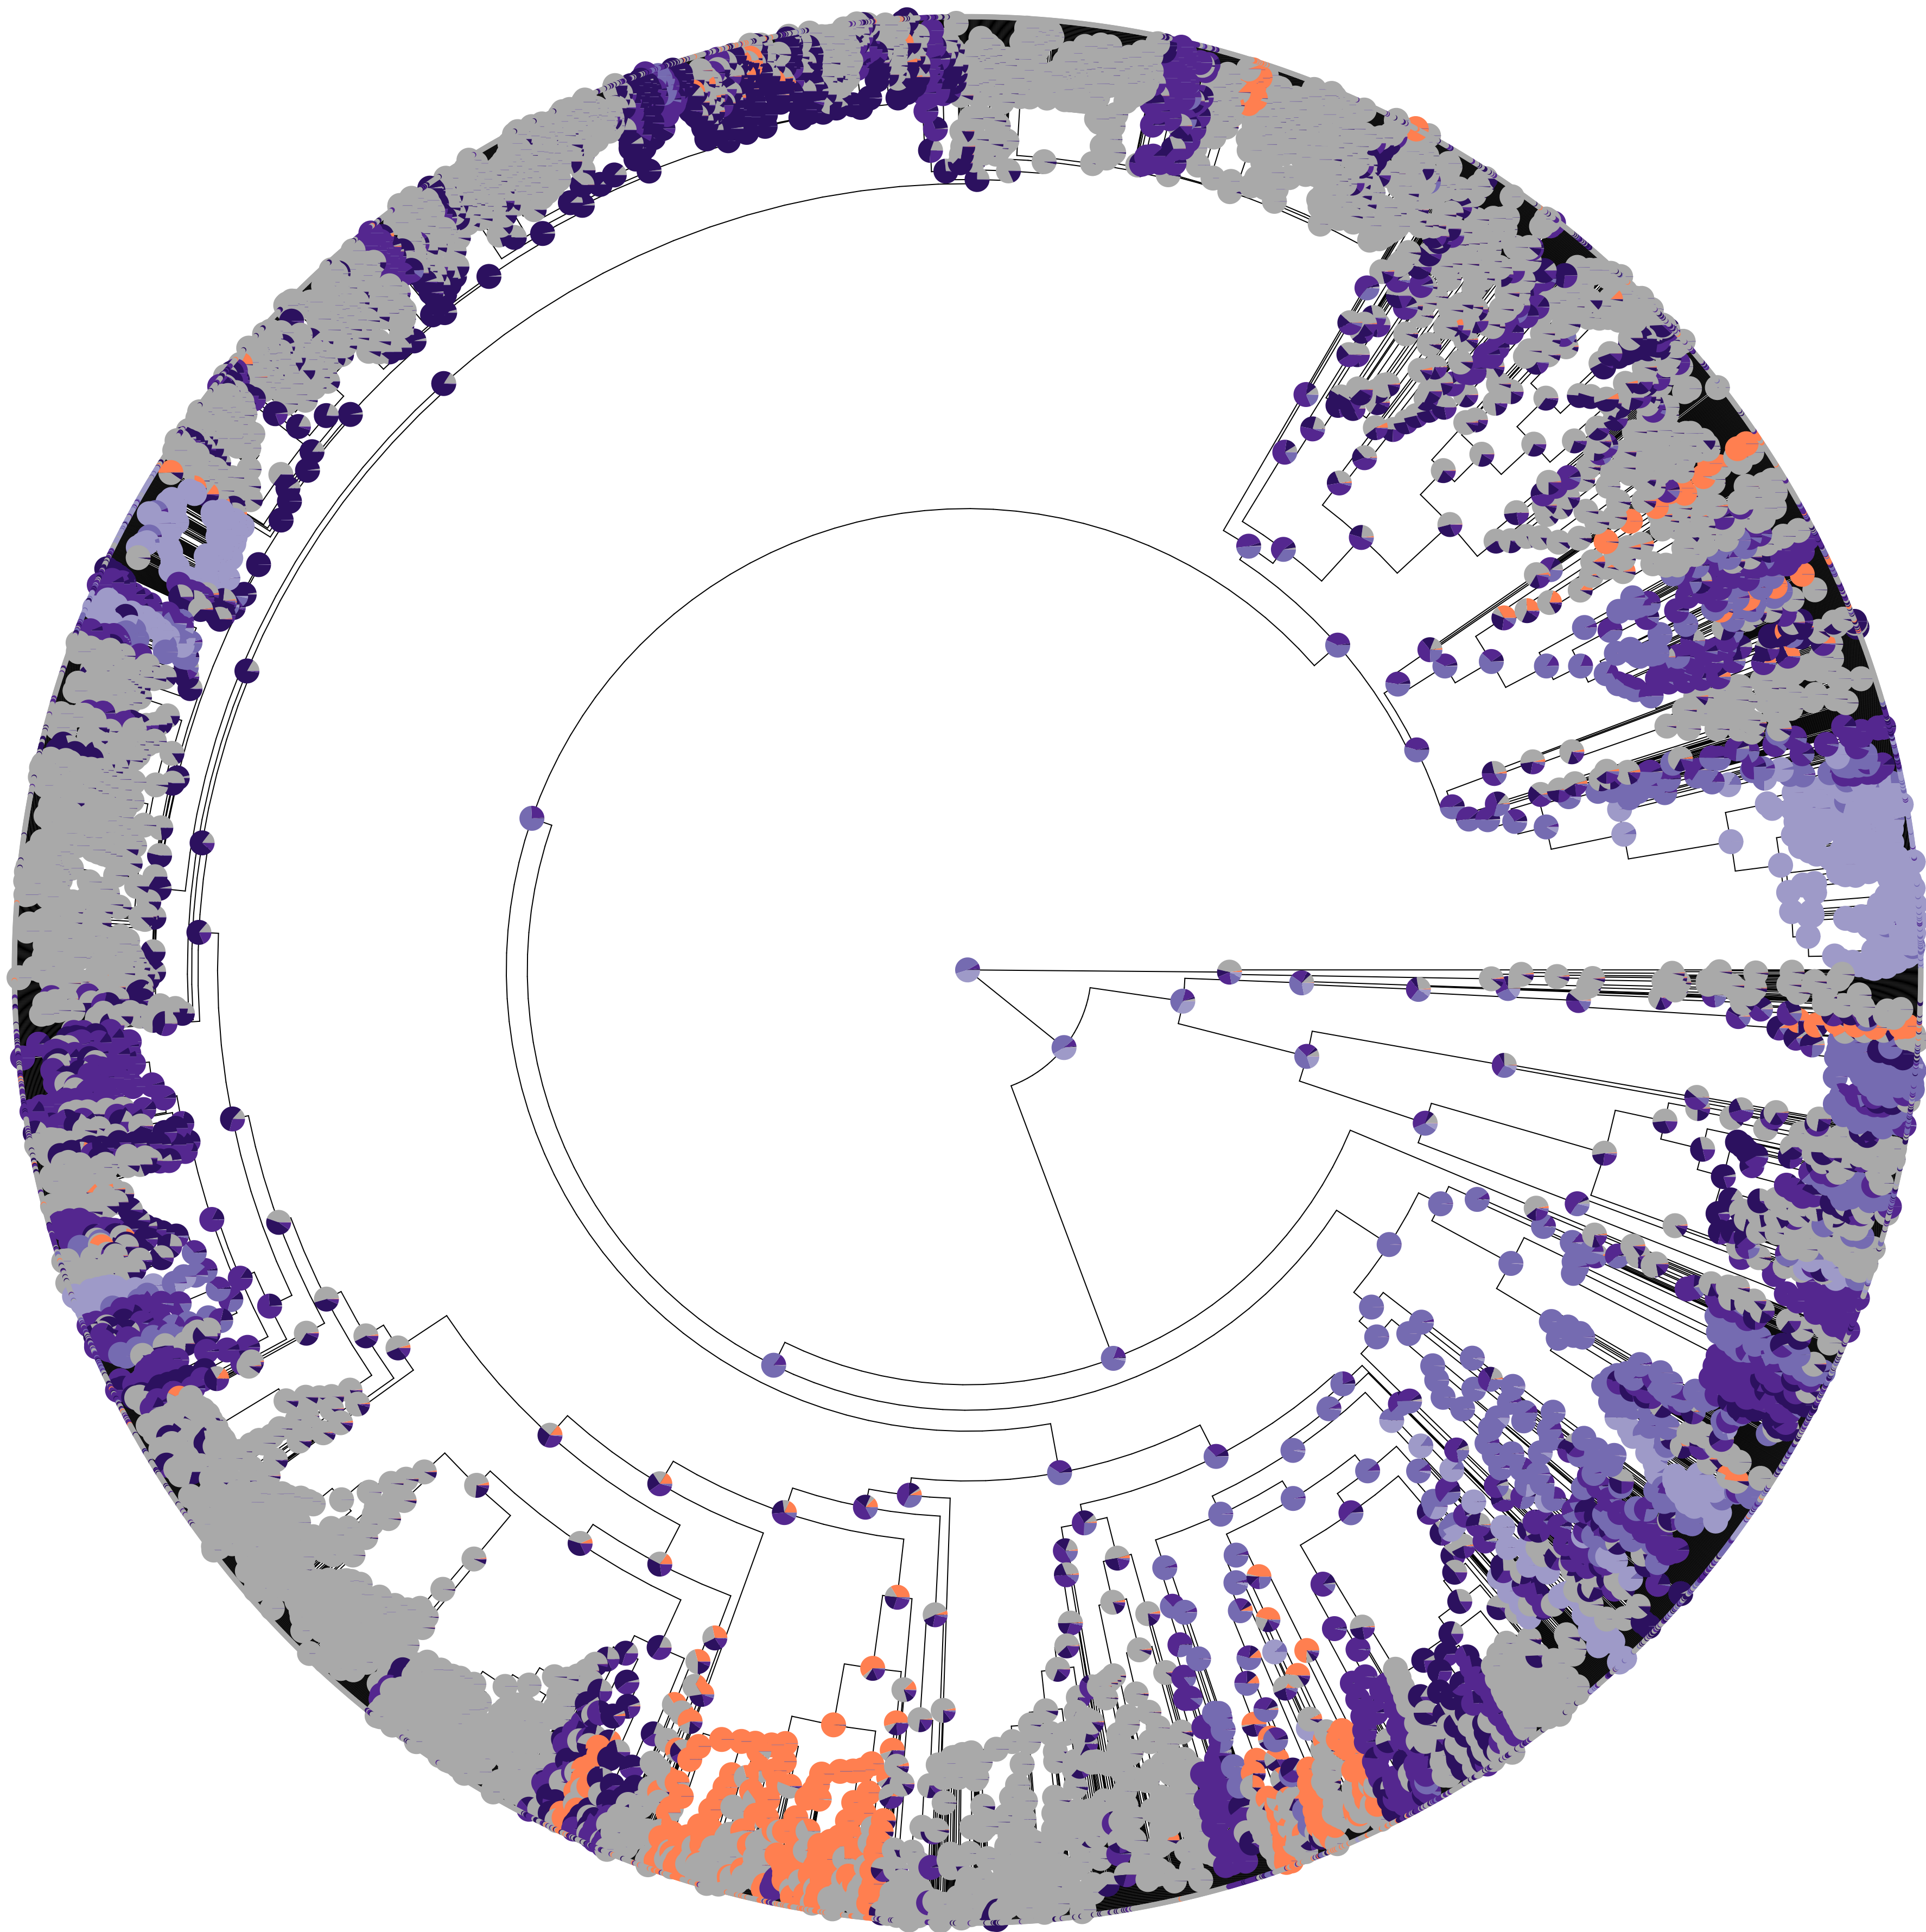

Supplement: Supplementary file 43 [file male_ext_pert_general.pdf › supp_3/male_ext_pert_general.pdf]



Supplement: Supplementary file 44 [file male_ext_pert_mantle.pdf › supp_3/male_ext_pert_mantle.pdf]



Supplement: Supplementary file 45 [file male_ext_pert_rump.pdf › supp_3/male_ext_pert_rump.pdf]

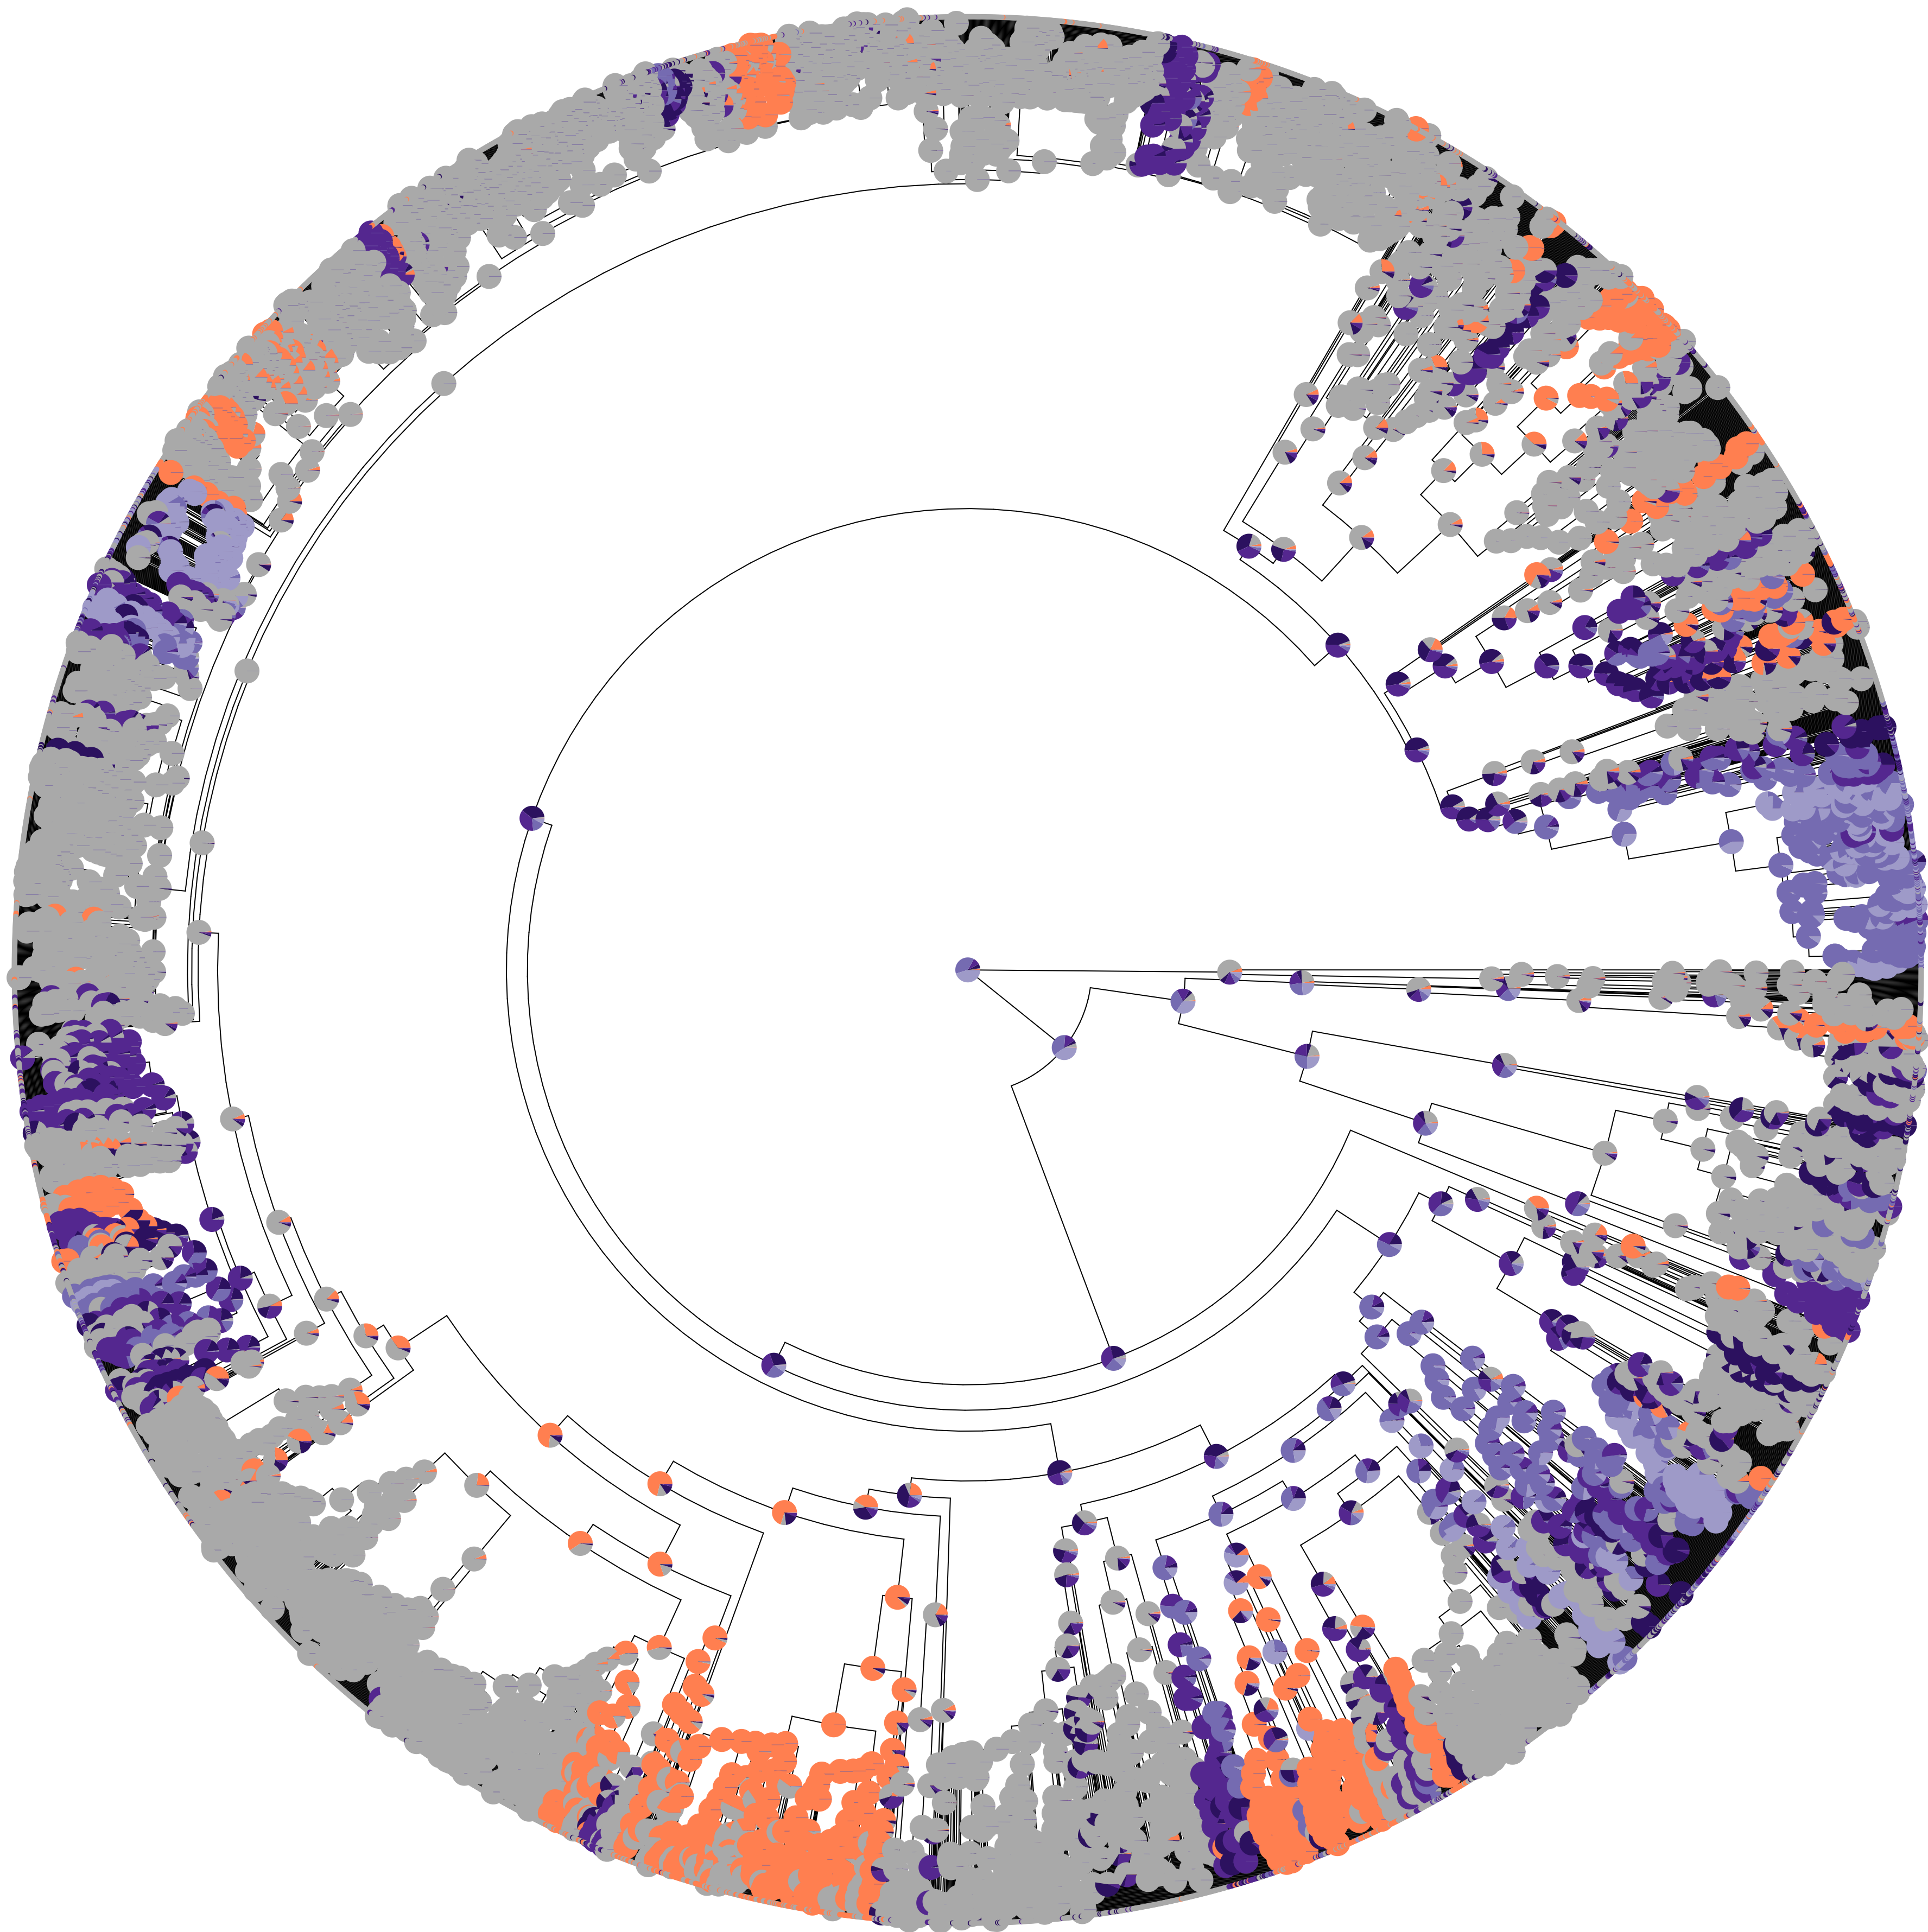

Supplement: Supplementary file 46 [file male_ext_pert_tail.pdf › supp_3/male_ext_pert_tail.pdf]

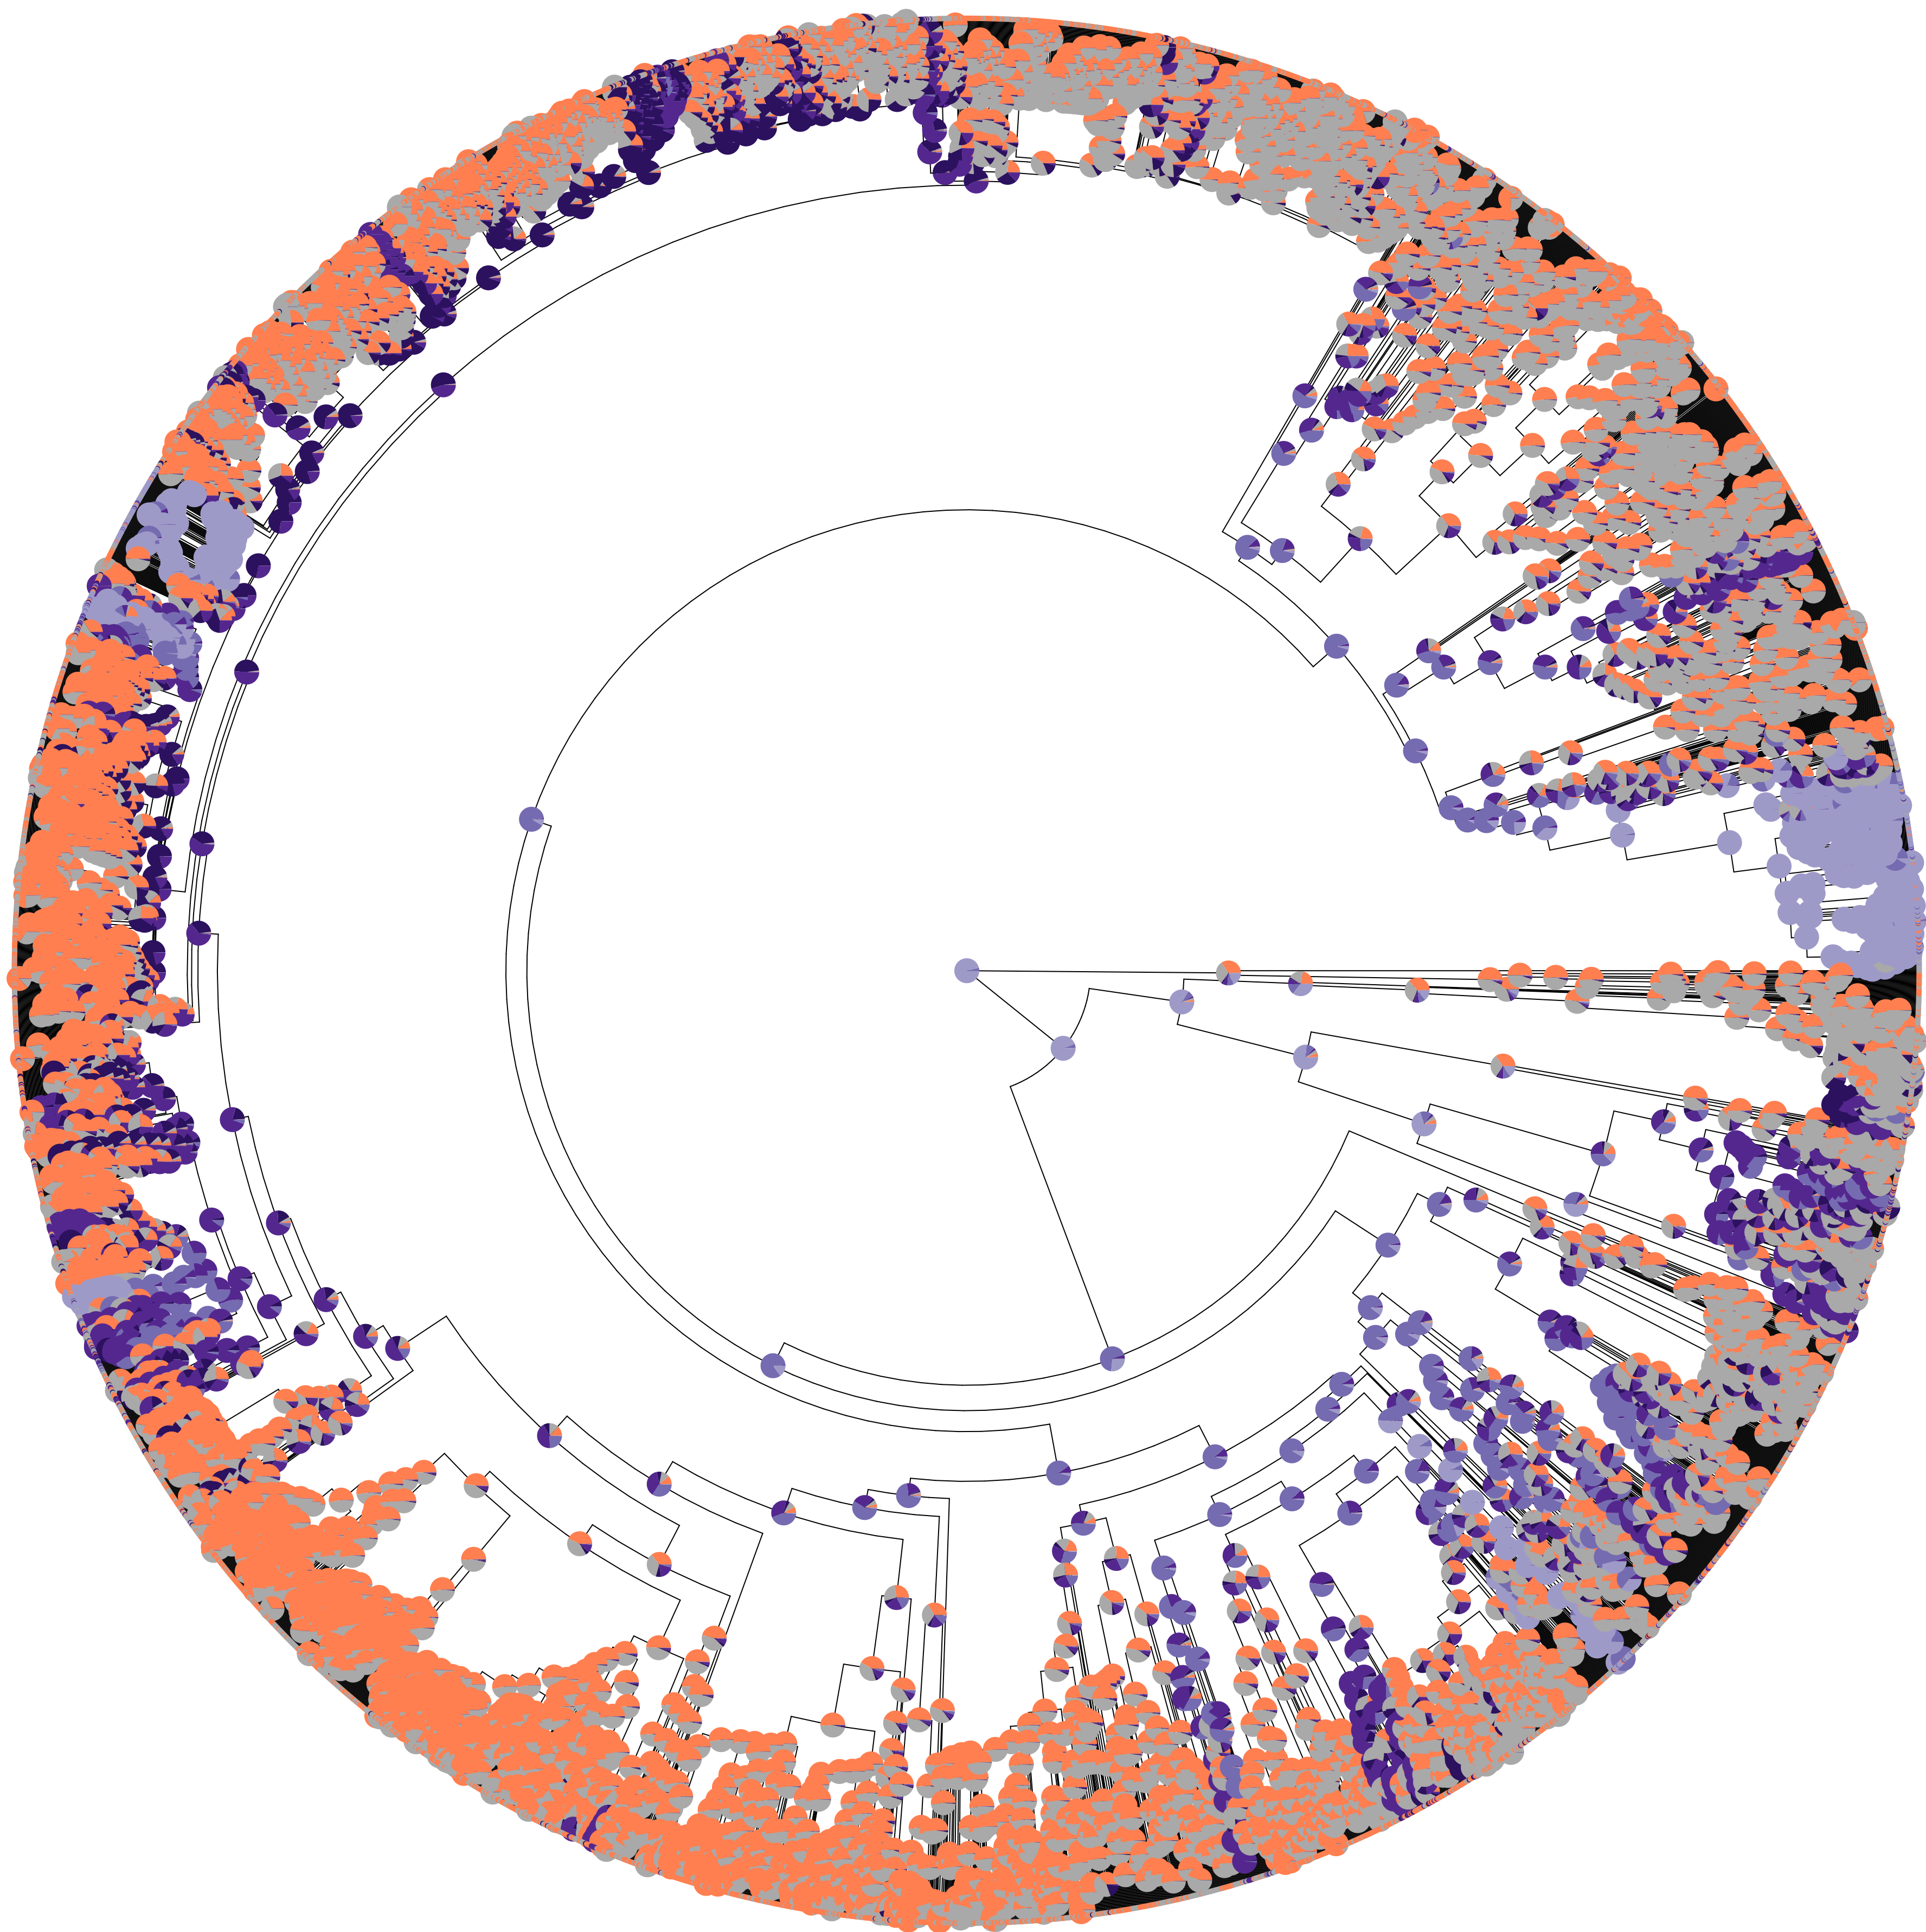

Supplement: Supplementary file 47 [file male_ext_pert_throat.pdf › supp_3/male_ext_pert_throat.pdf]



Supplement: Supplementary file 48 [file male_ext_pert_wings.pdf › supp_3/male_ext_pert_wings.pdf]

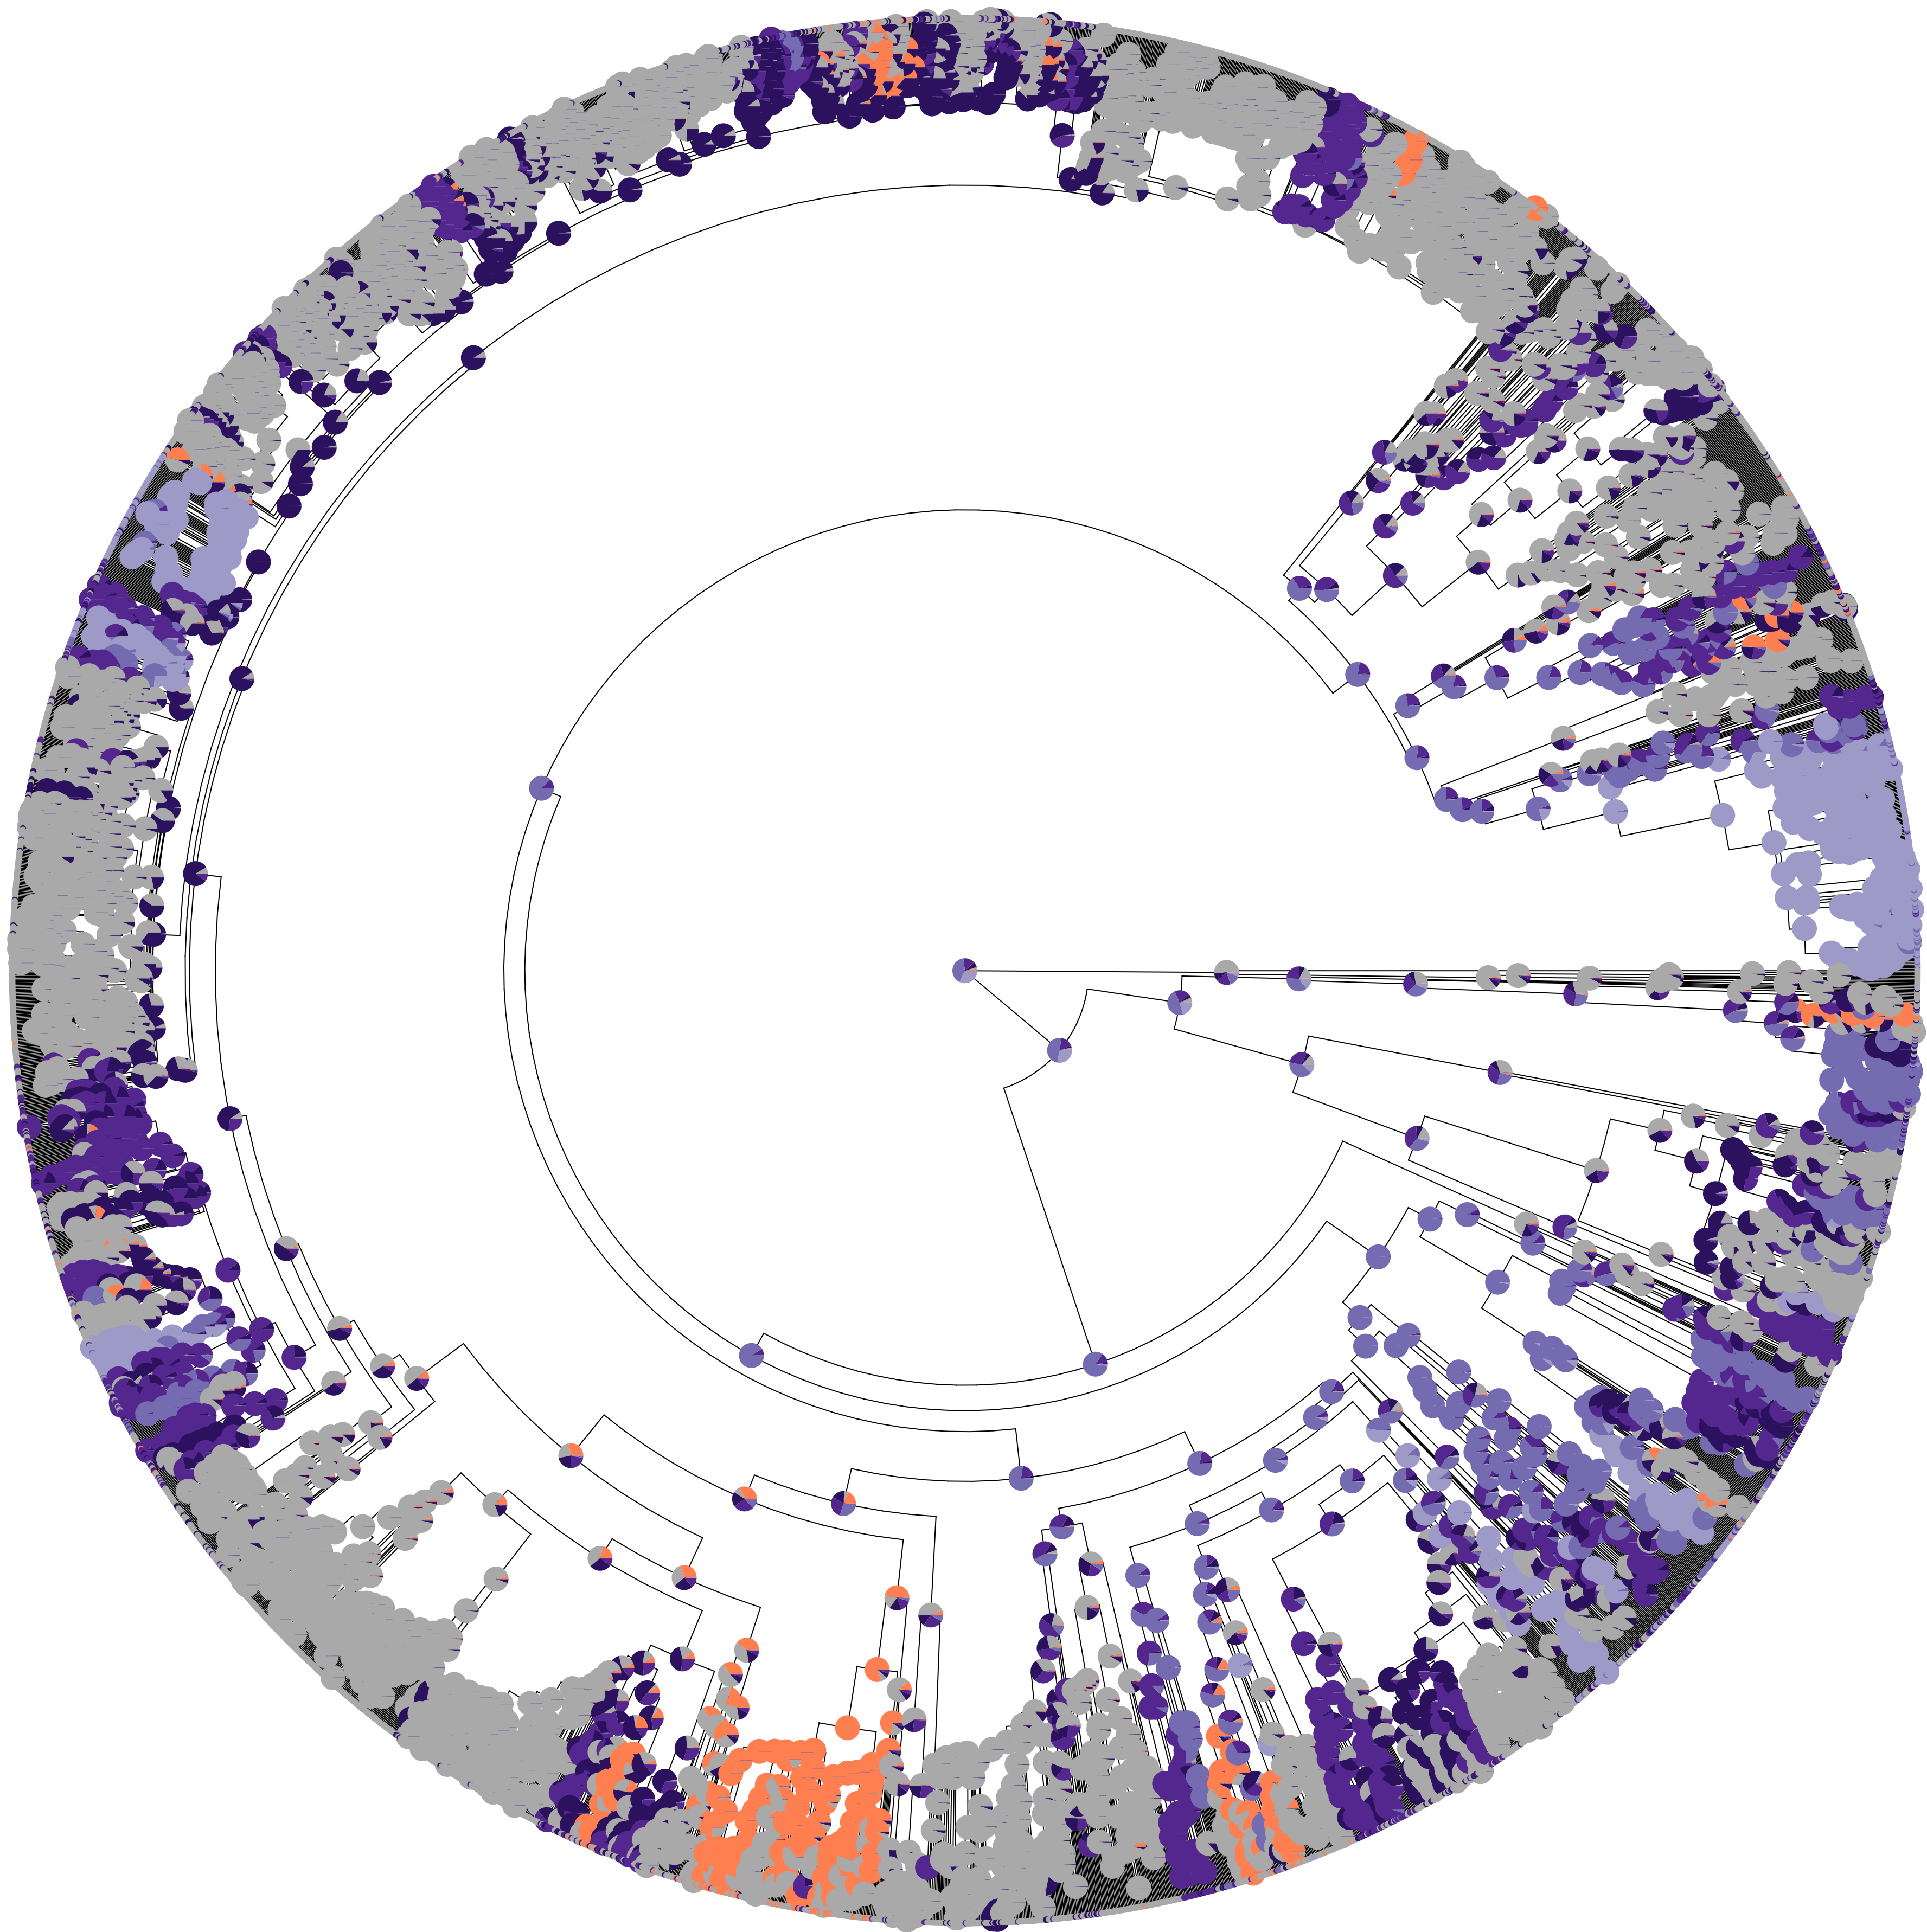

Supplement: Supplementary file 49 [file male_general.pdf › supp_3/male_general.pdf]

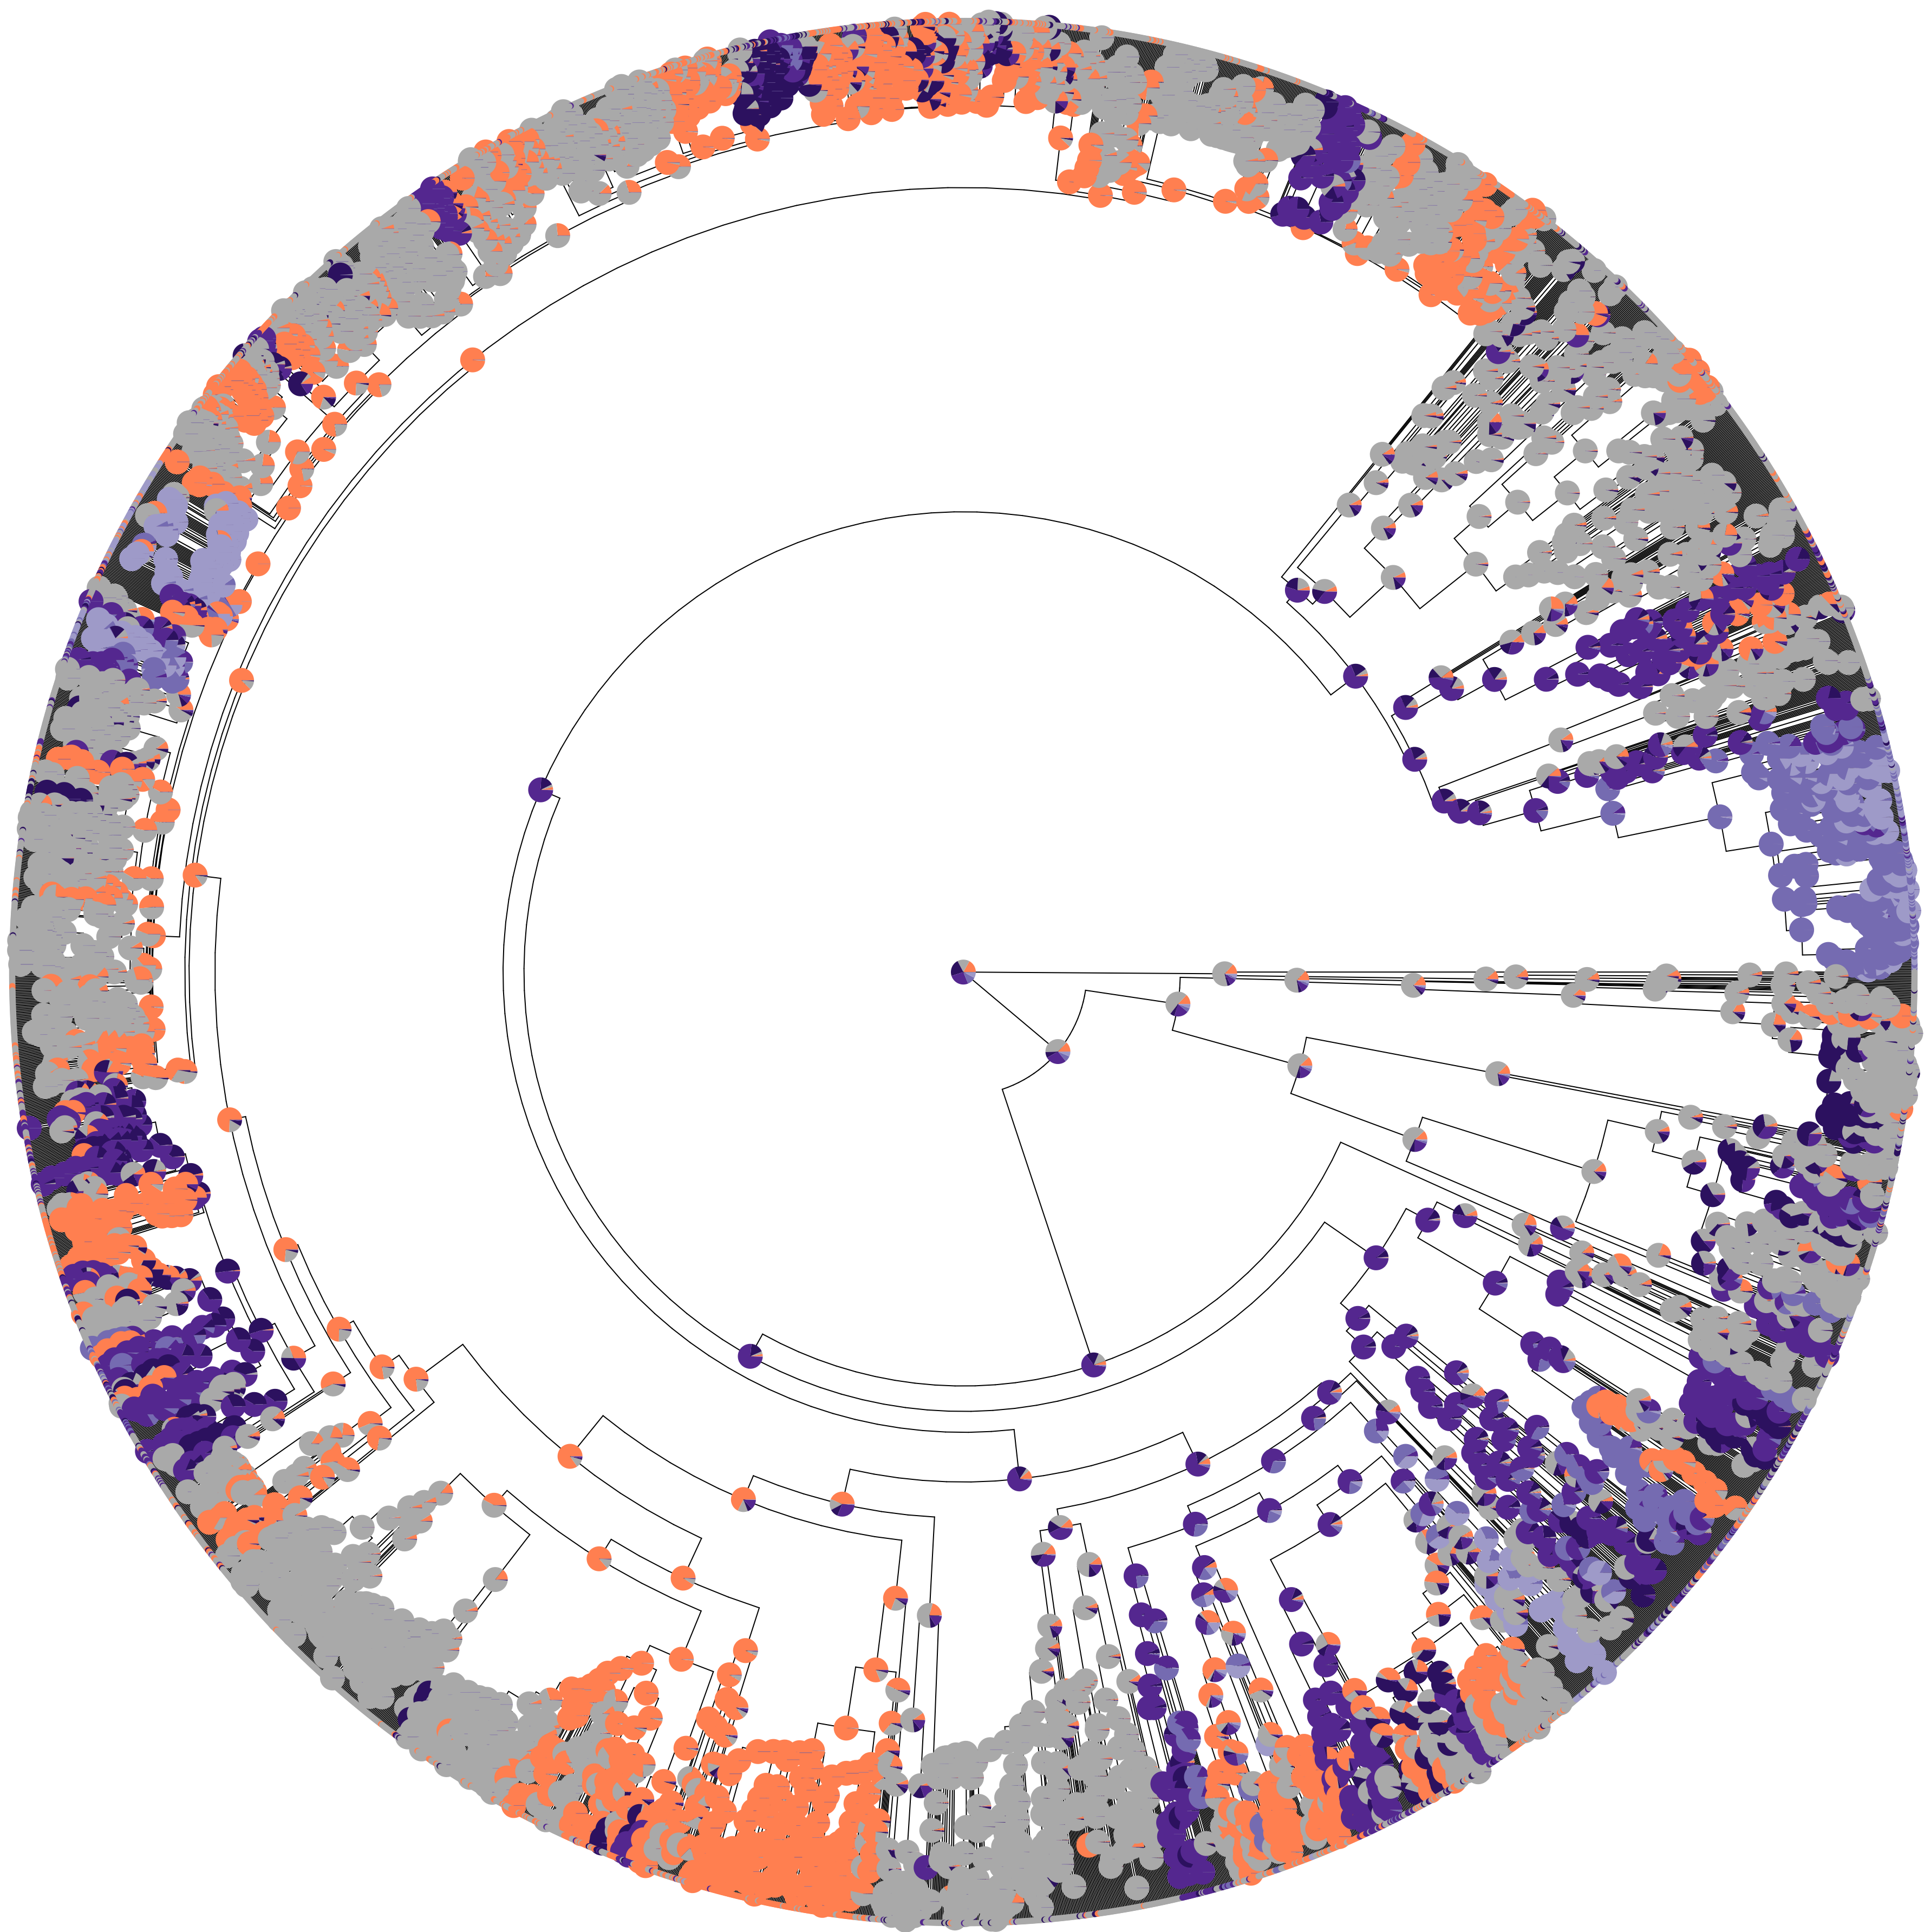

Supplement: Supplementary file 50 [file male_mantle.pdf › supp_3/male_mantle.pdf]

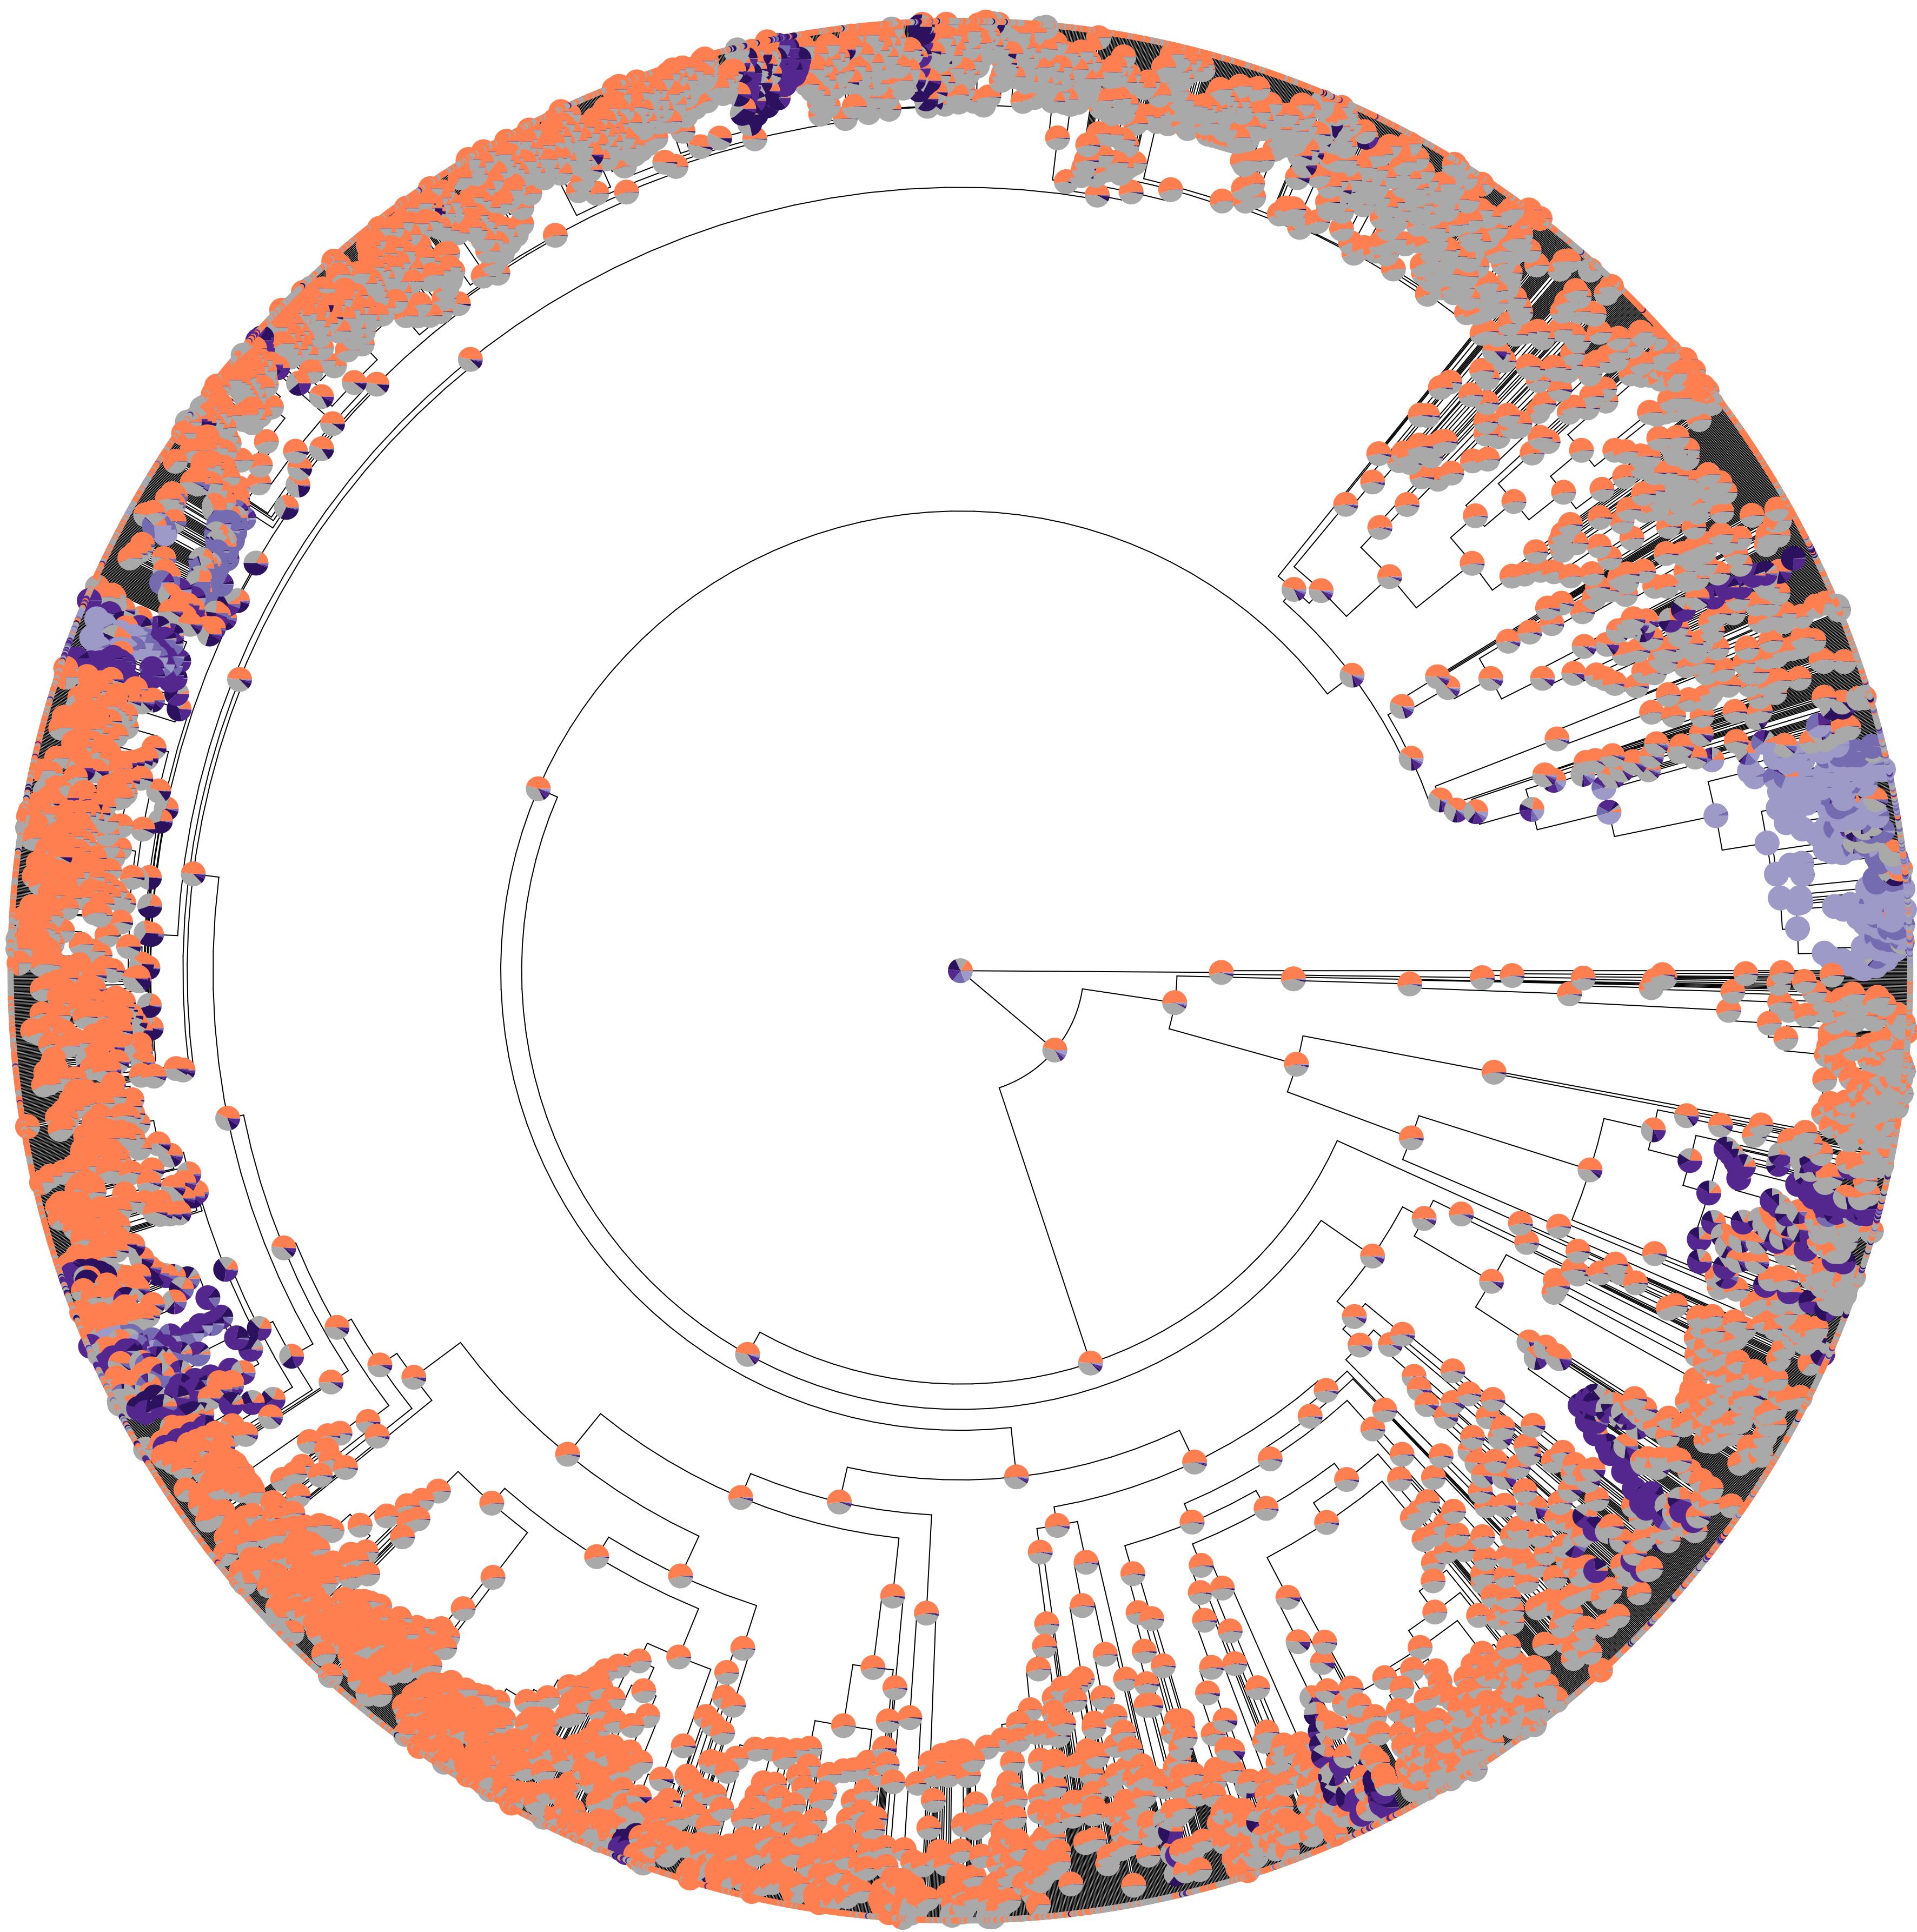

Supplement: Supplementary file 51 [file male_pert_belly.pdf › supp_3/male_pert_belly.pdf]

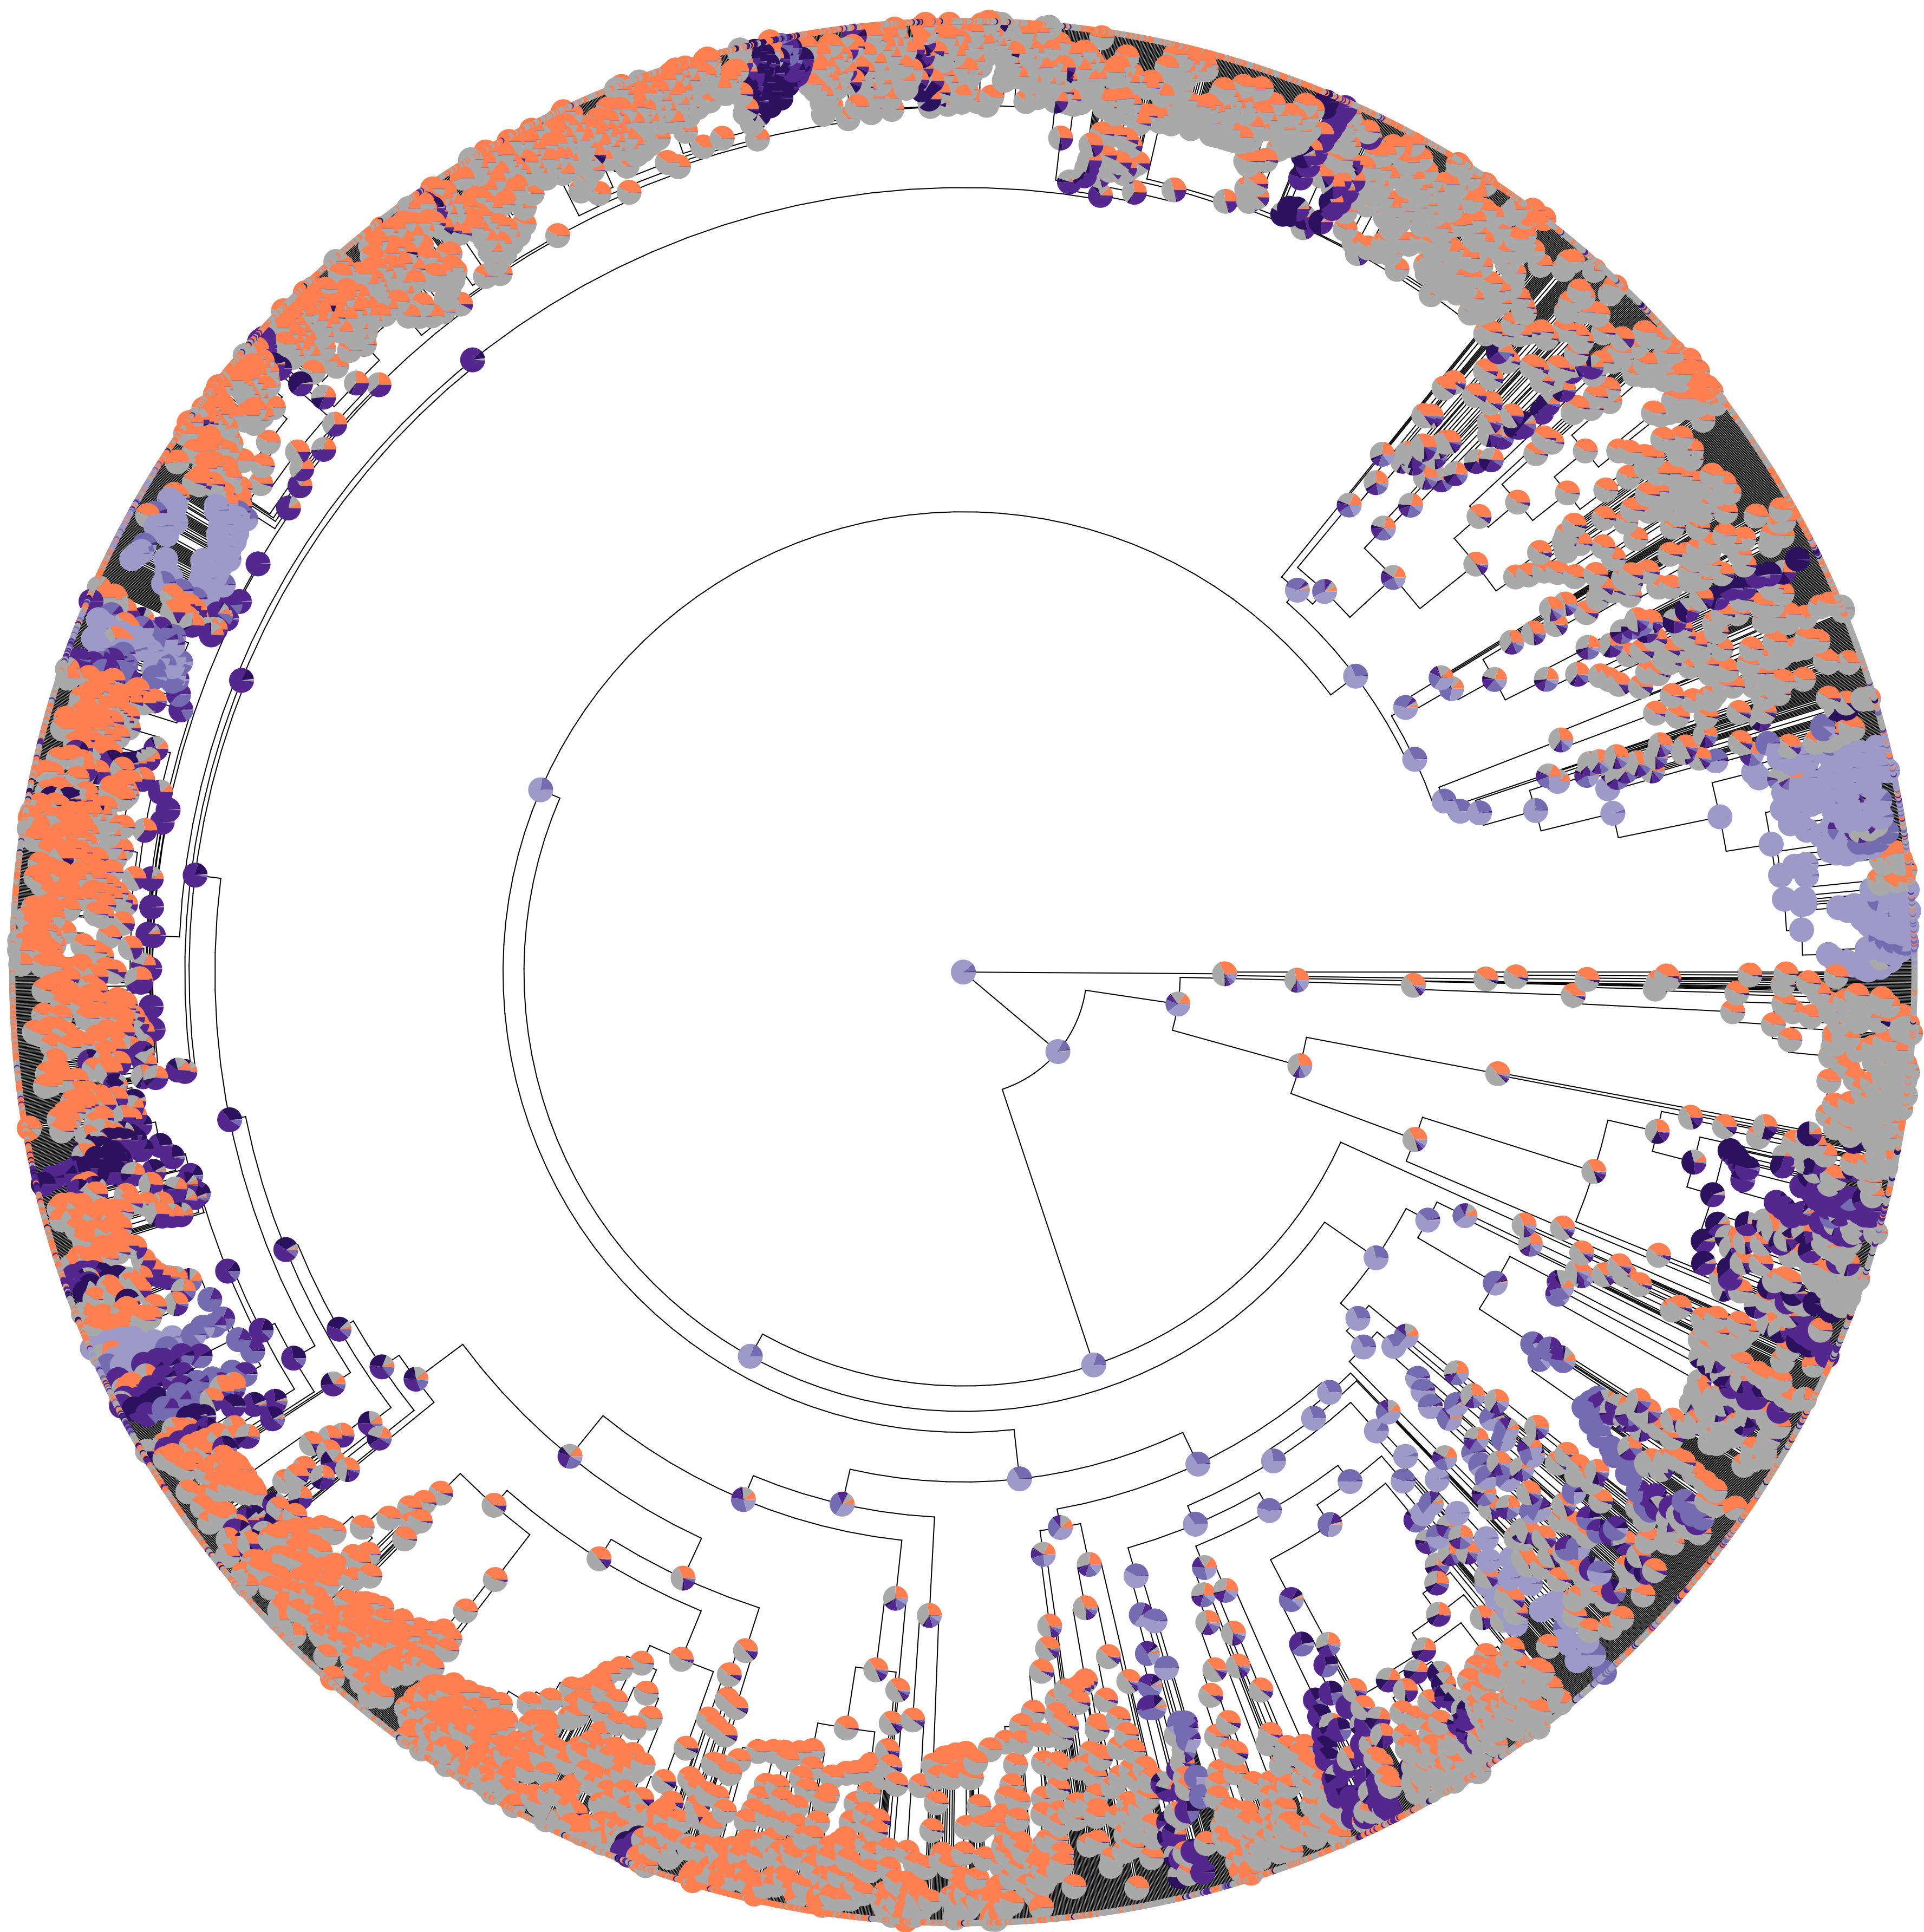

Supplement: Supplementary file 52 [file male_pert_breast.pdf › supp_3/male_pert_breast.pdf]

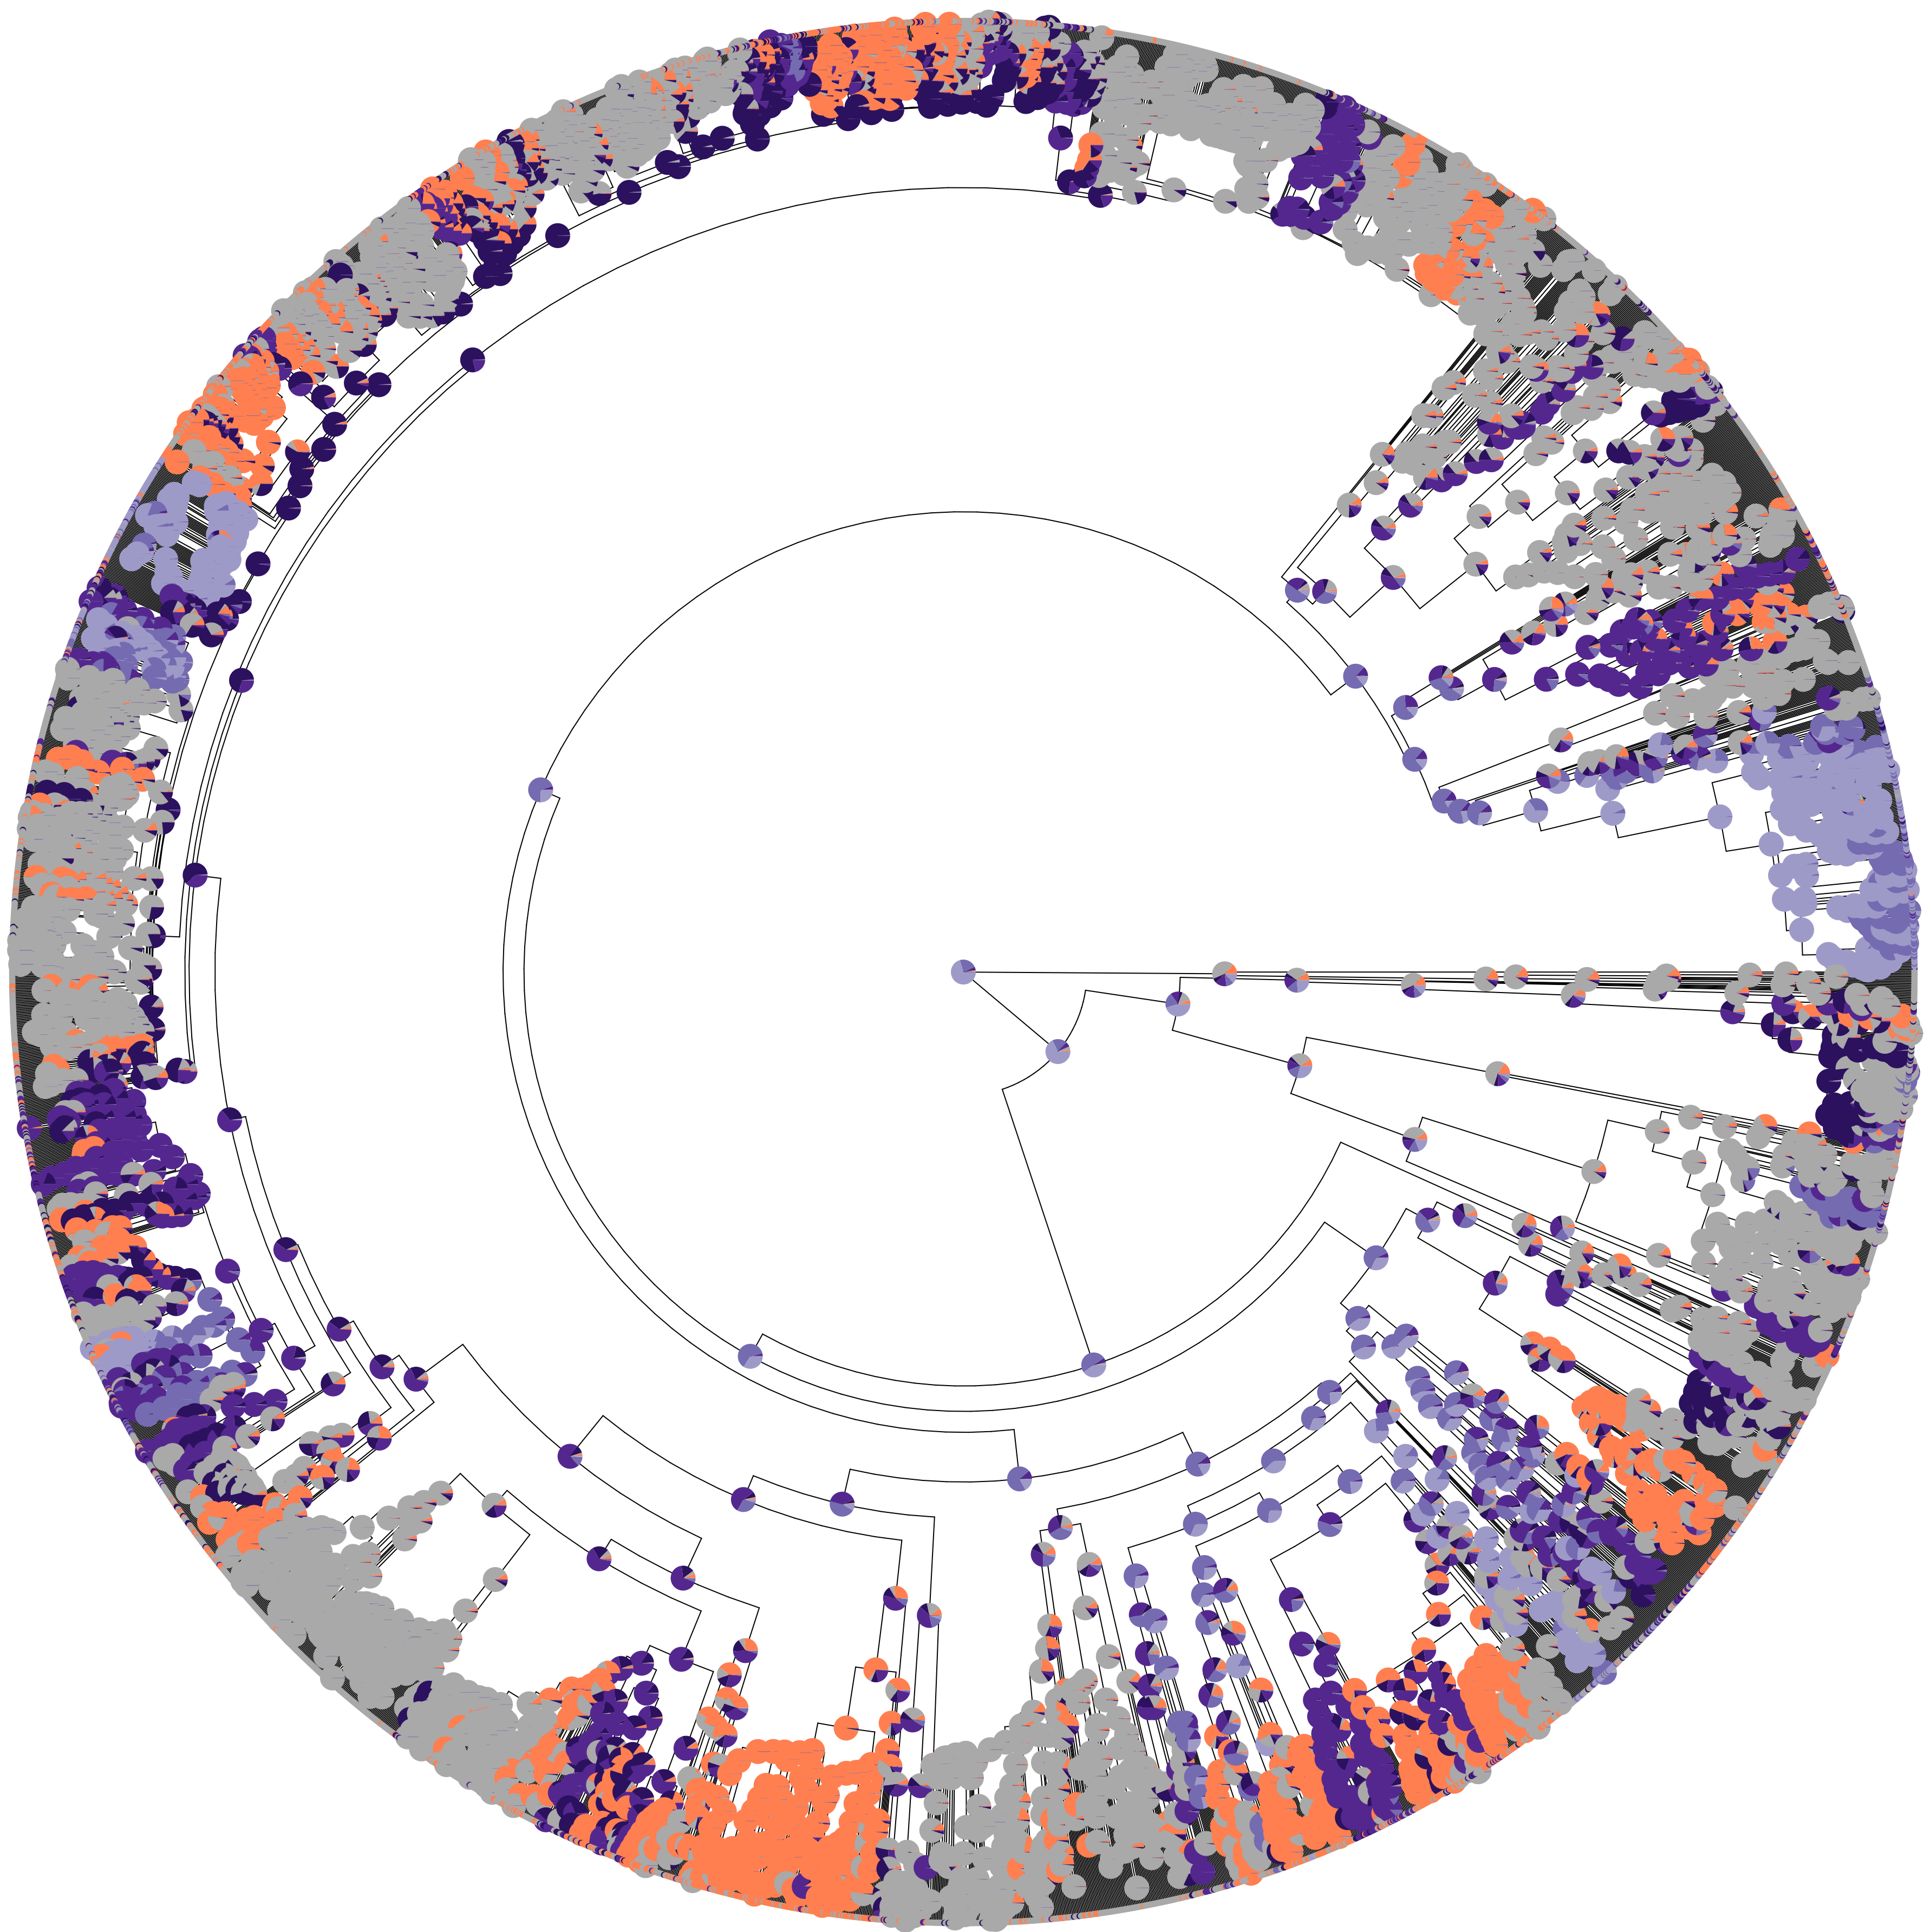

Supplement: Supplementary file 53 [file male_pert_crown.pdf › supp_3/male_pert_crown.pdf]

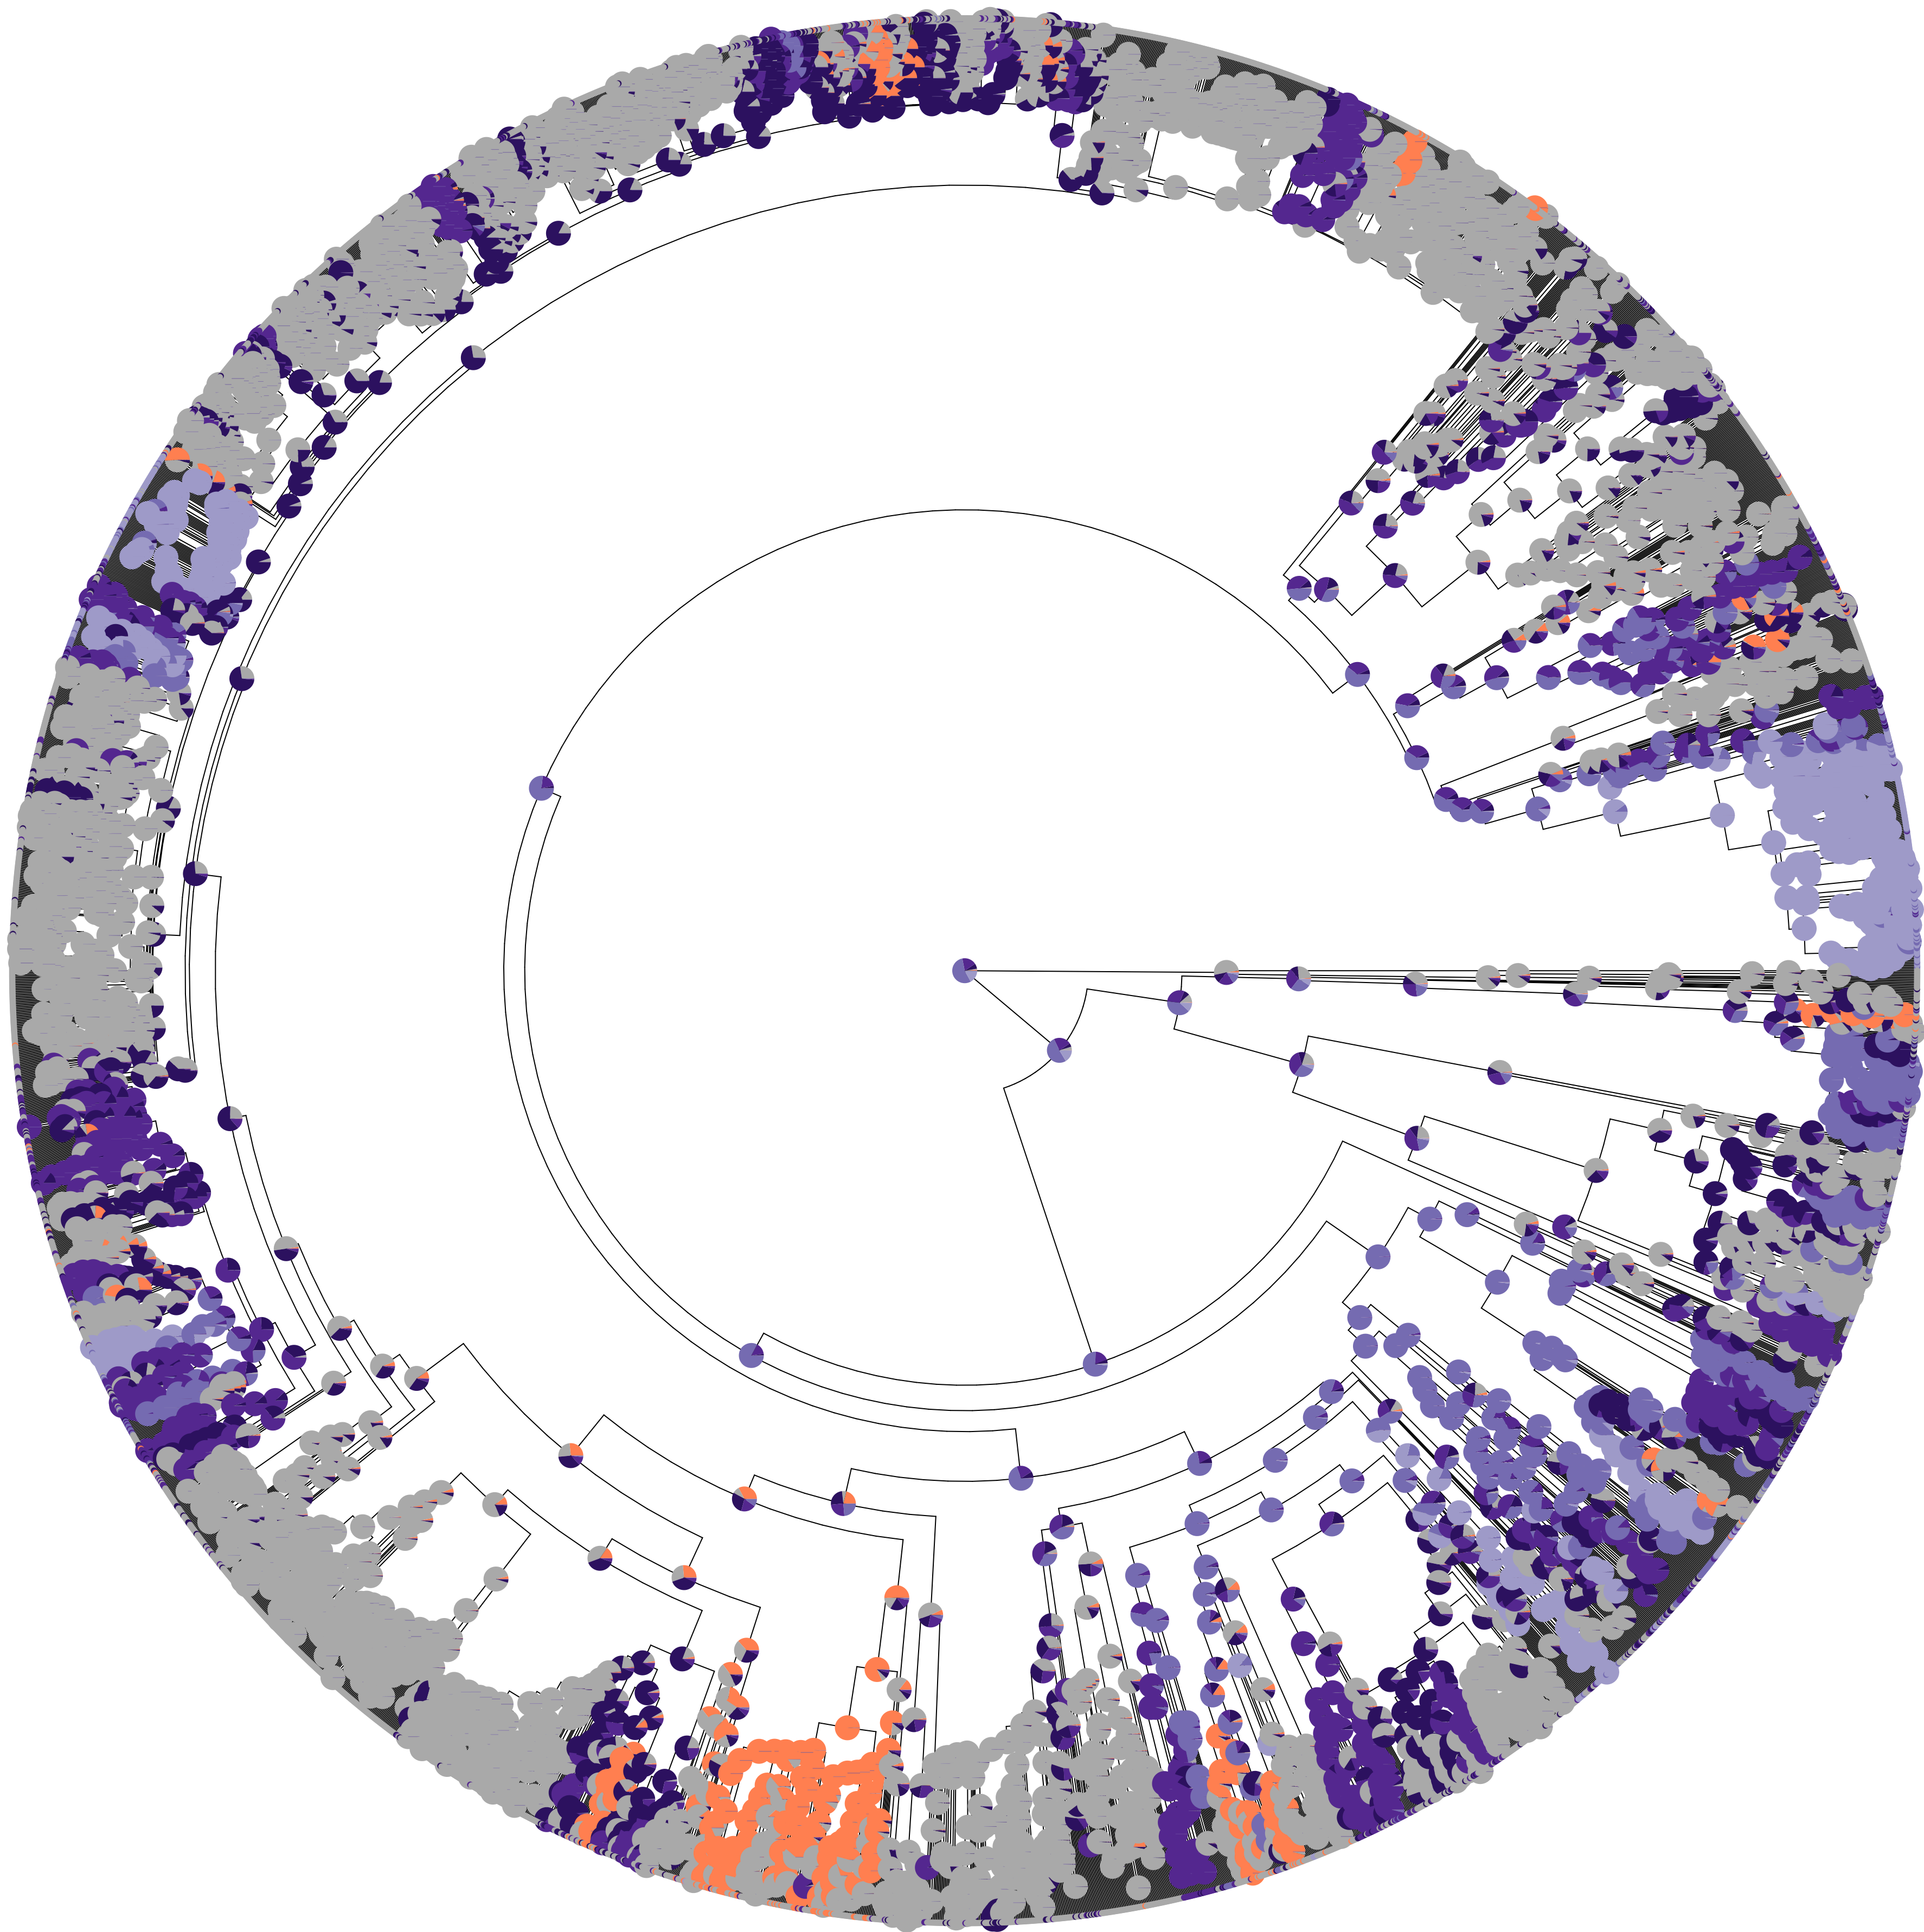

Supplement: Supplementary file 54 [file male_pert_general.pdf › supp_3/male_pert_general.pdf]

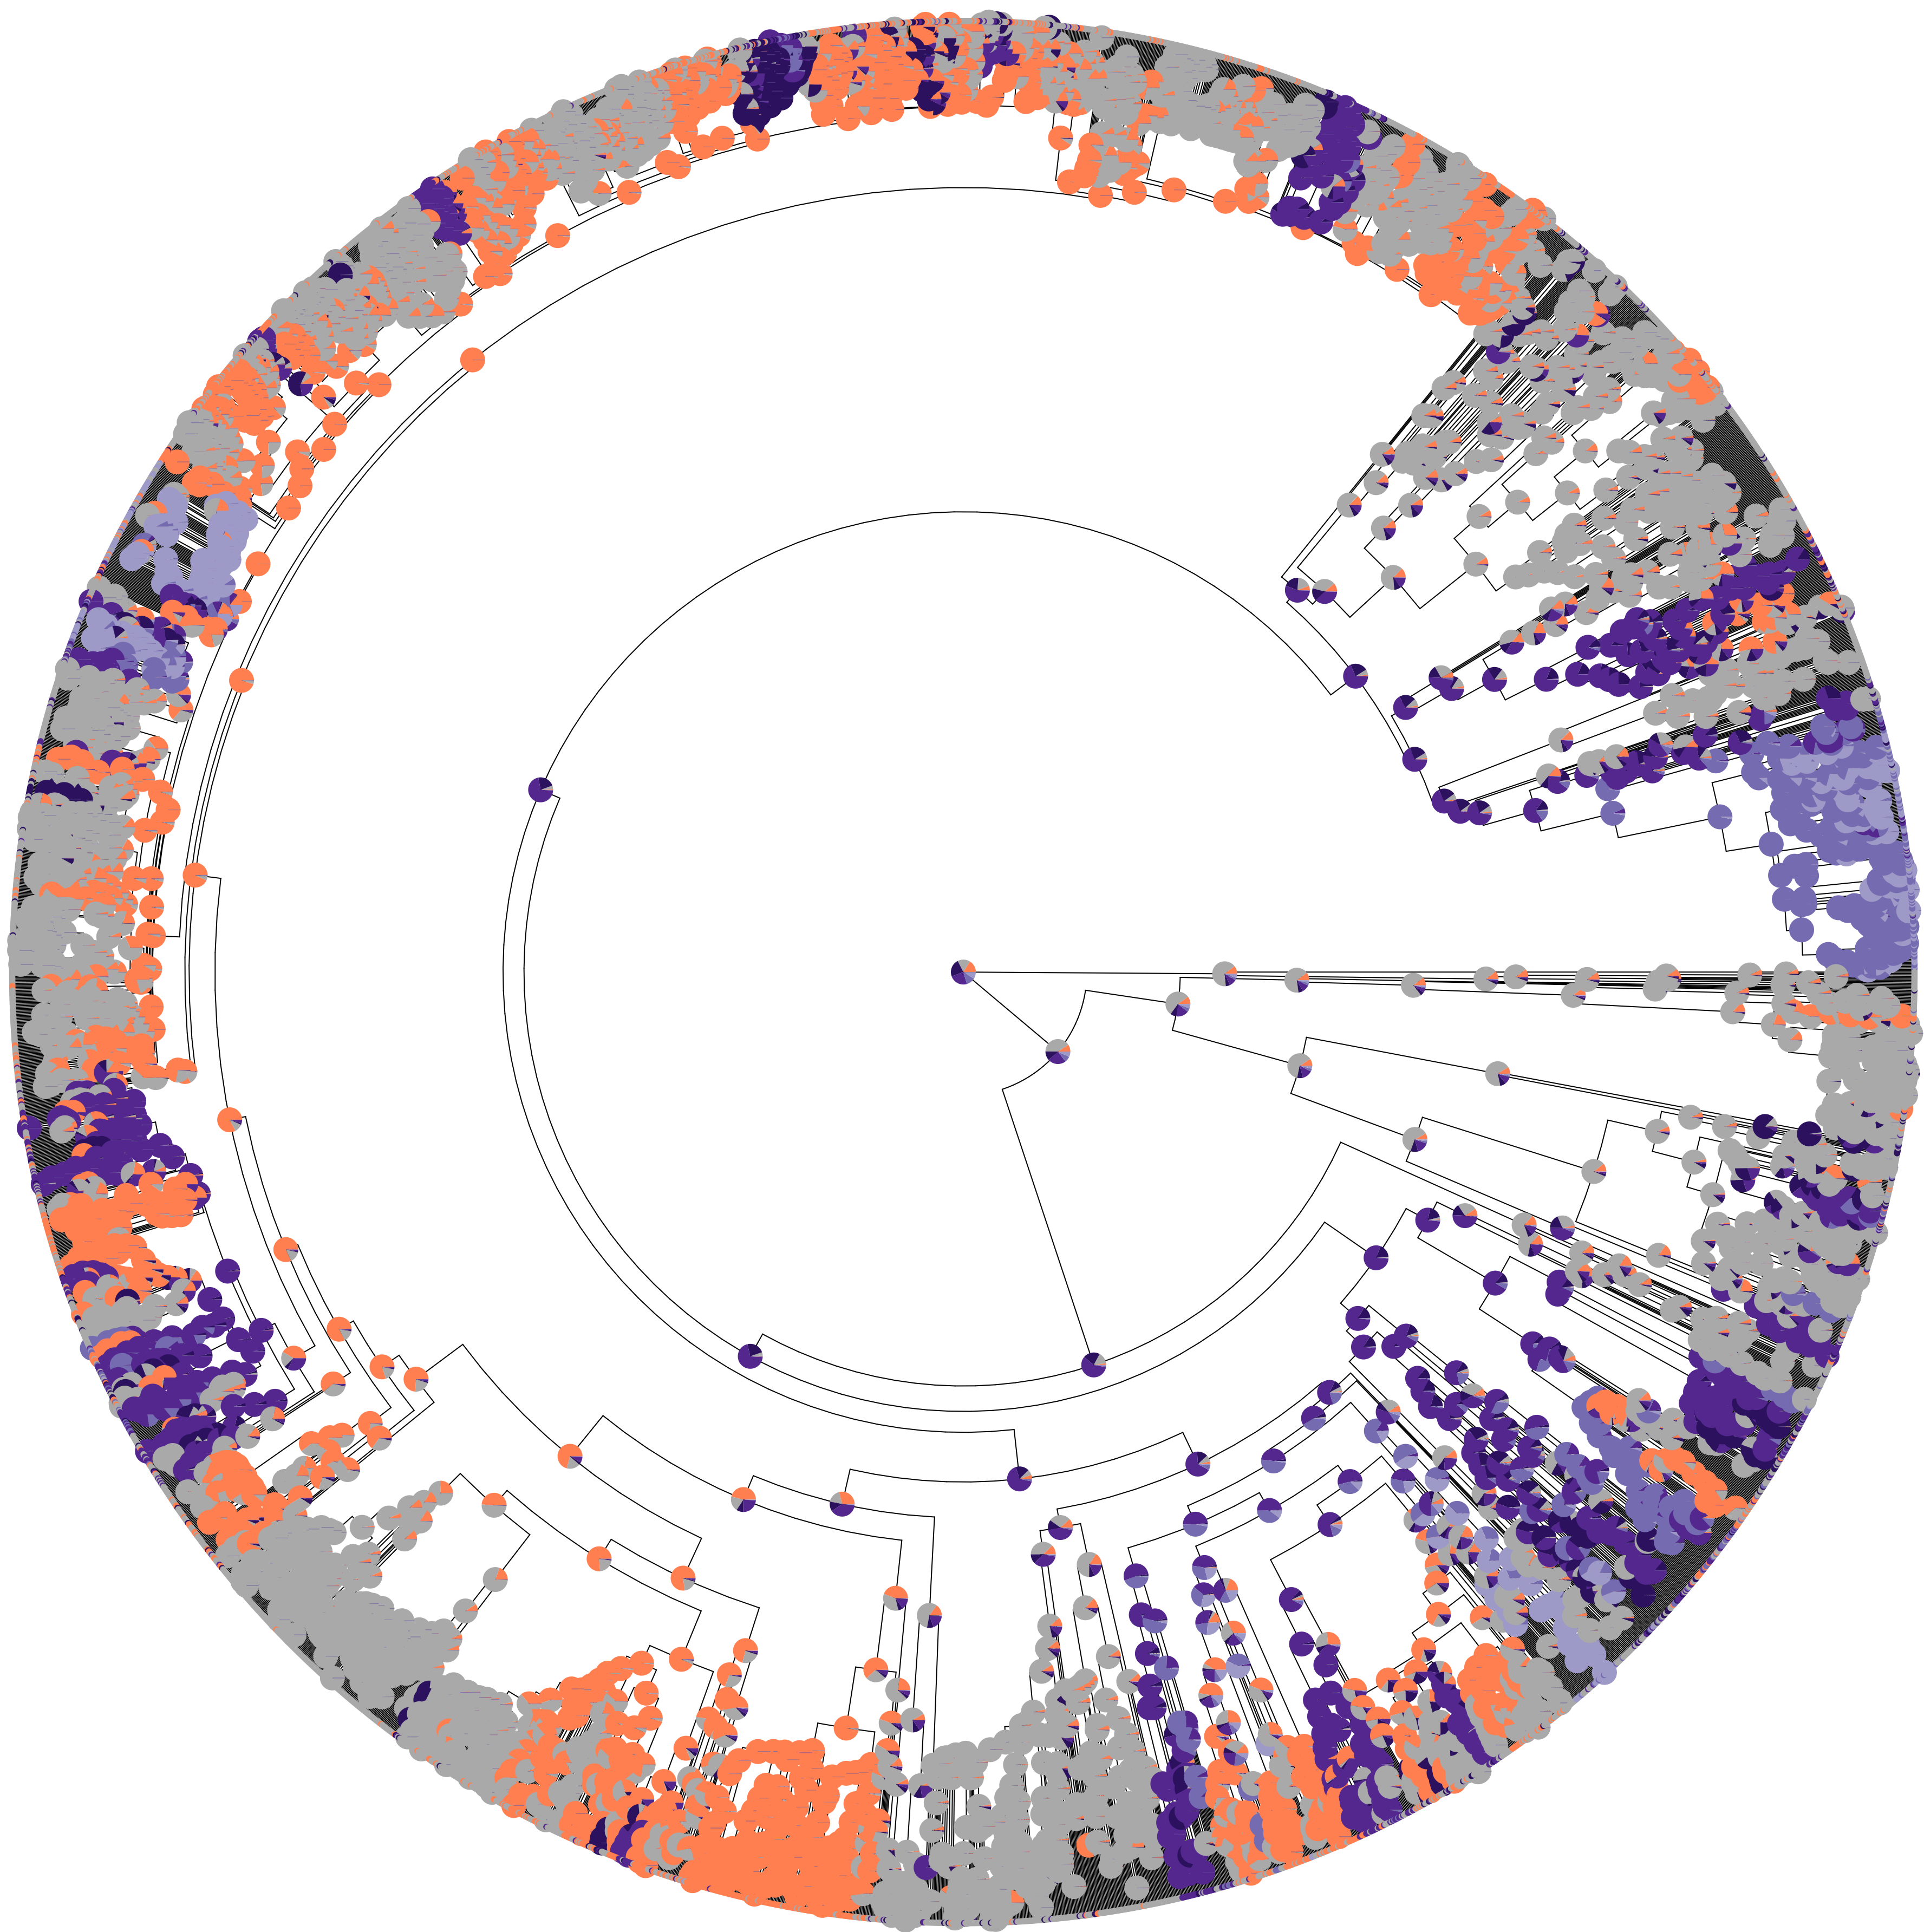

Supplement: Supplementary file 55 [file male_pert_mantle.pdf › supp_3/male_pert_mantle.pdf]

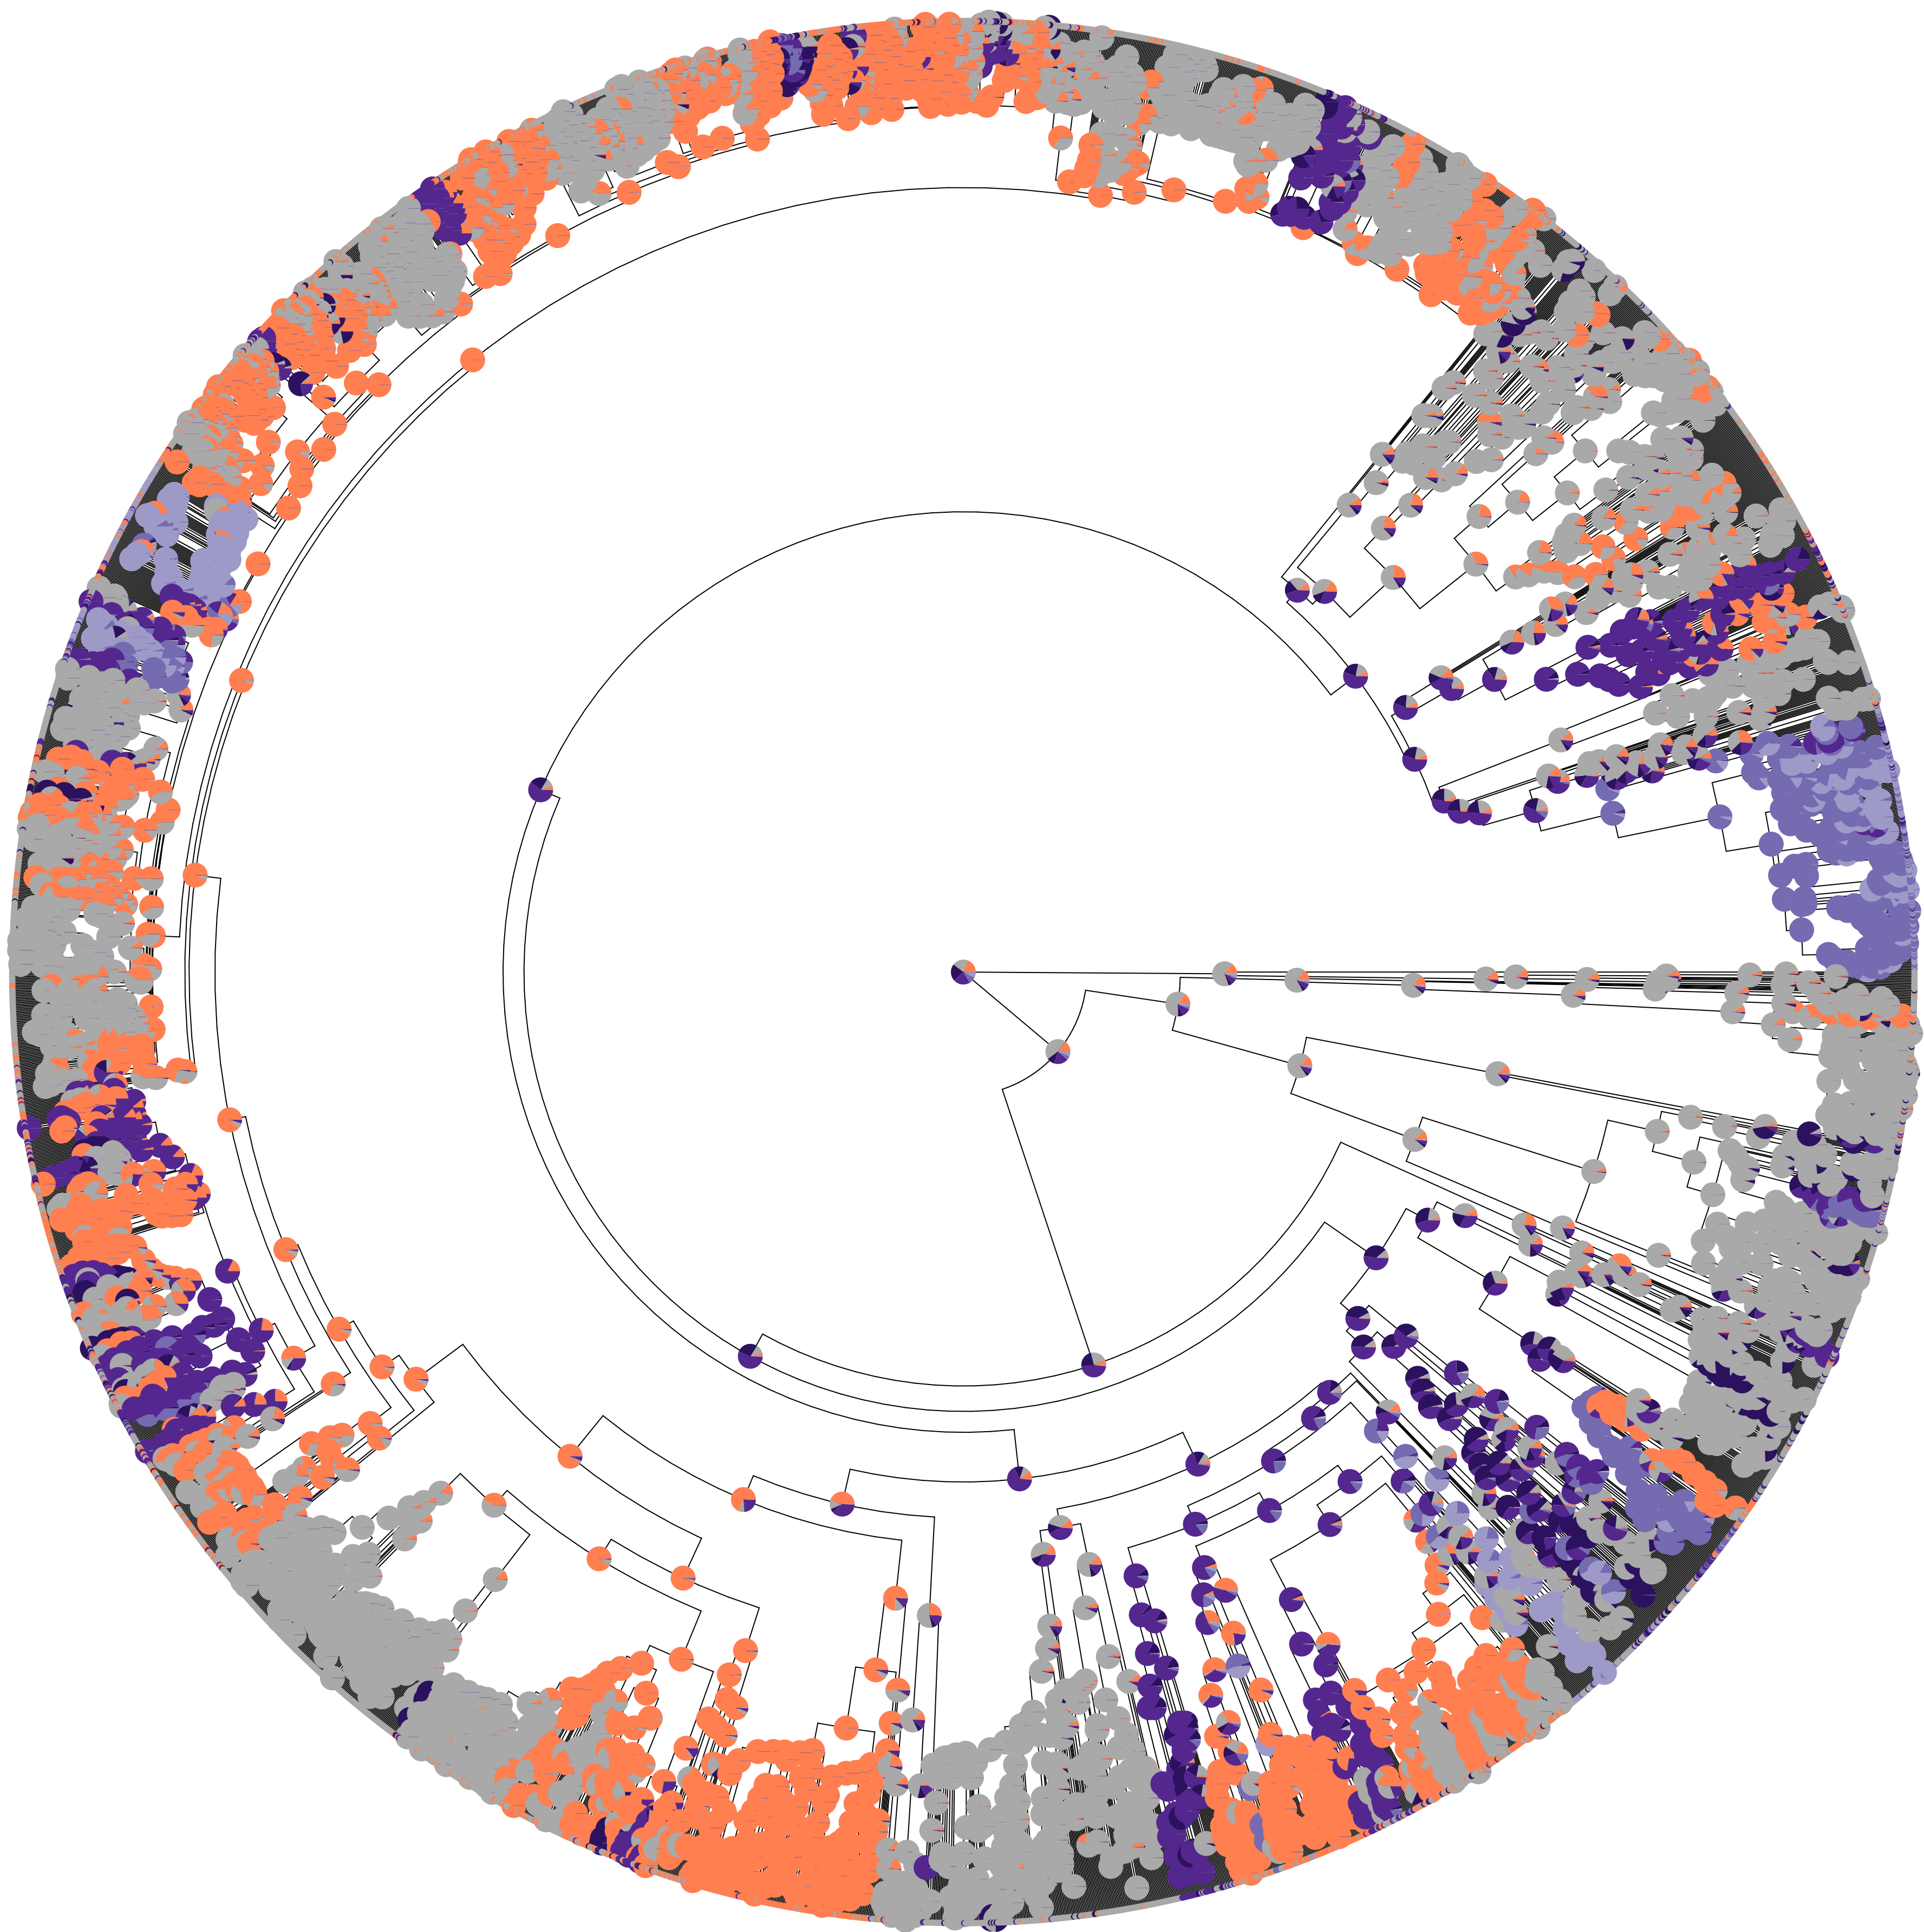

Supplement: Supplementary file 56 [file male_pert_rump.pdf › supp_3/male_pert_rump.pdf]

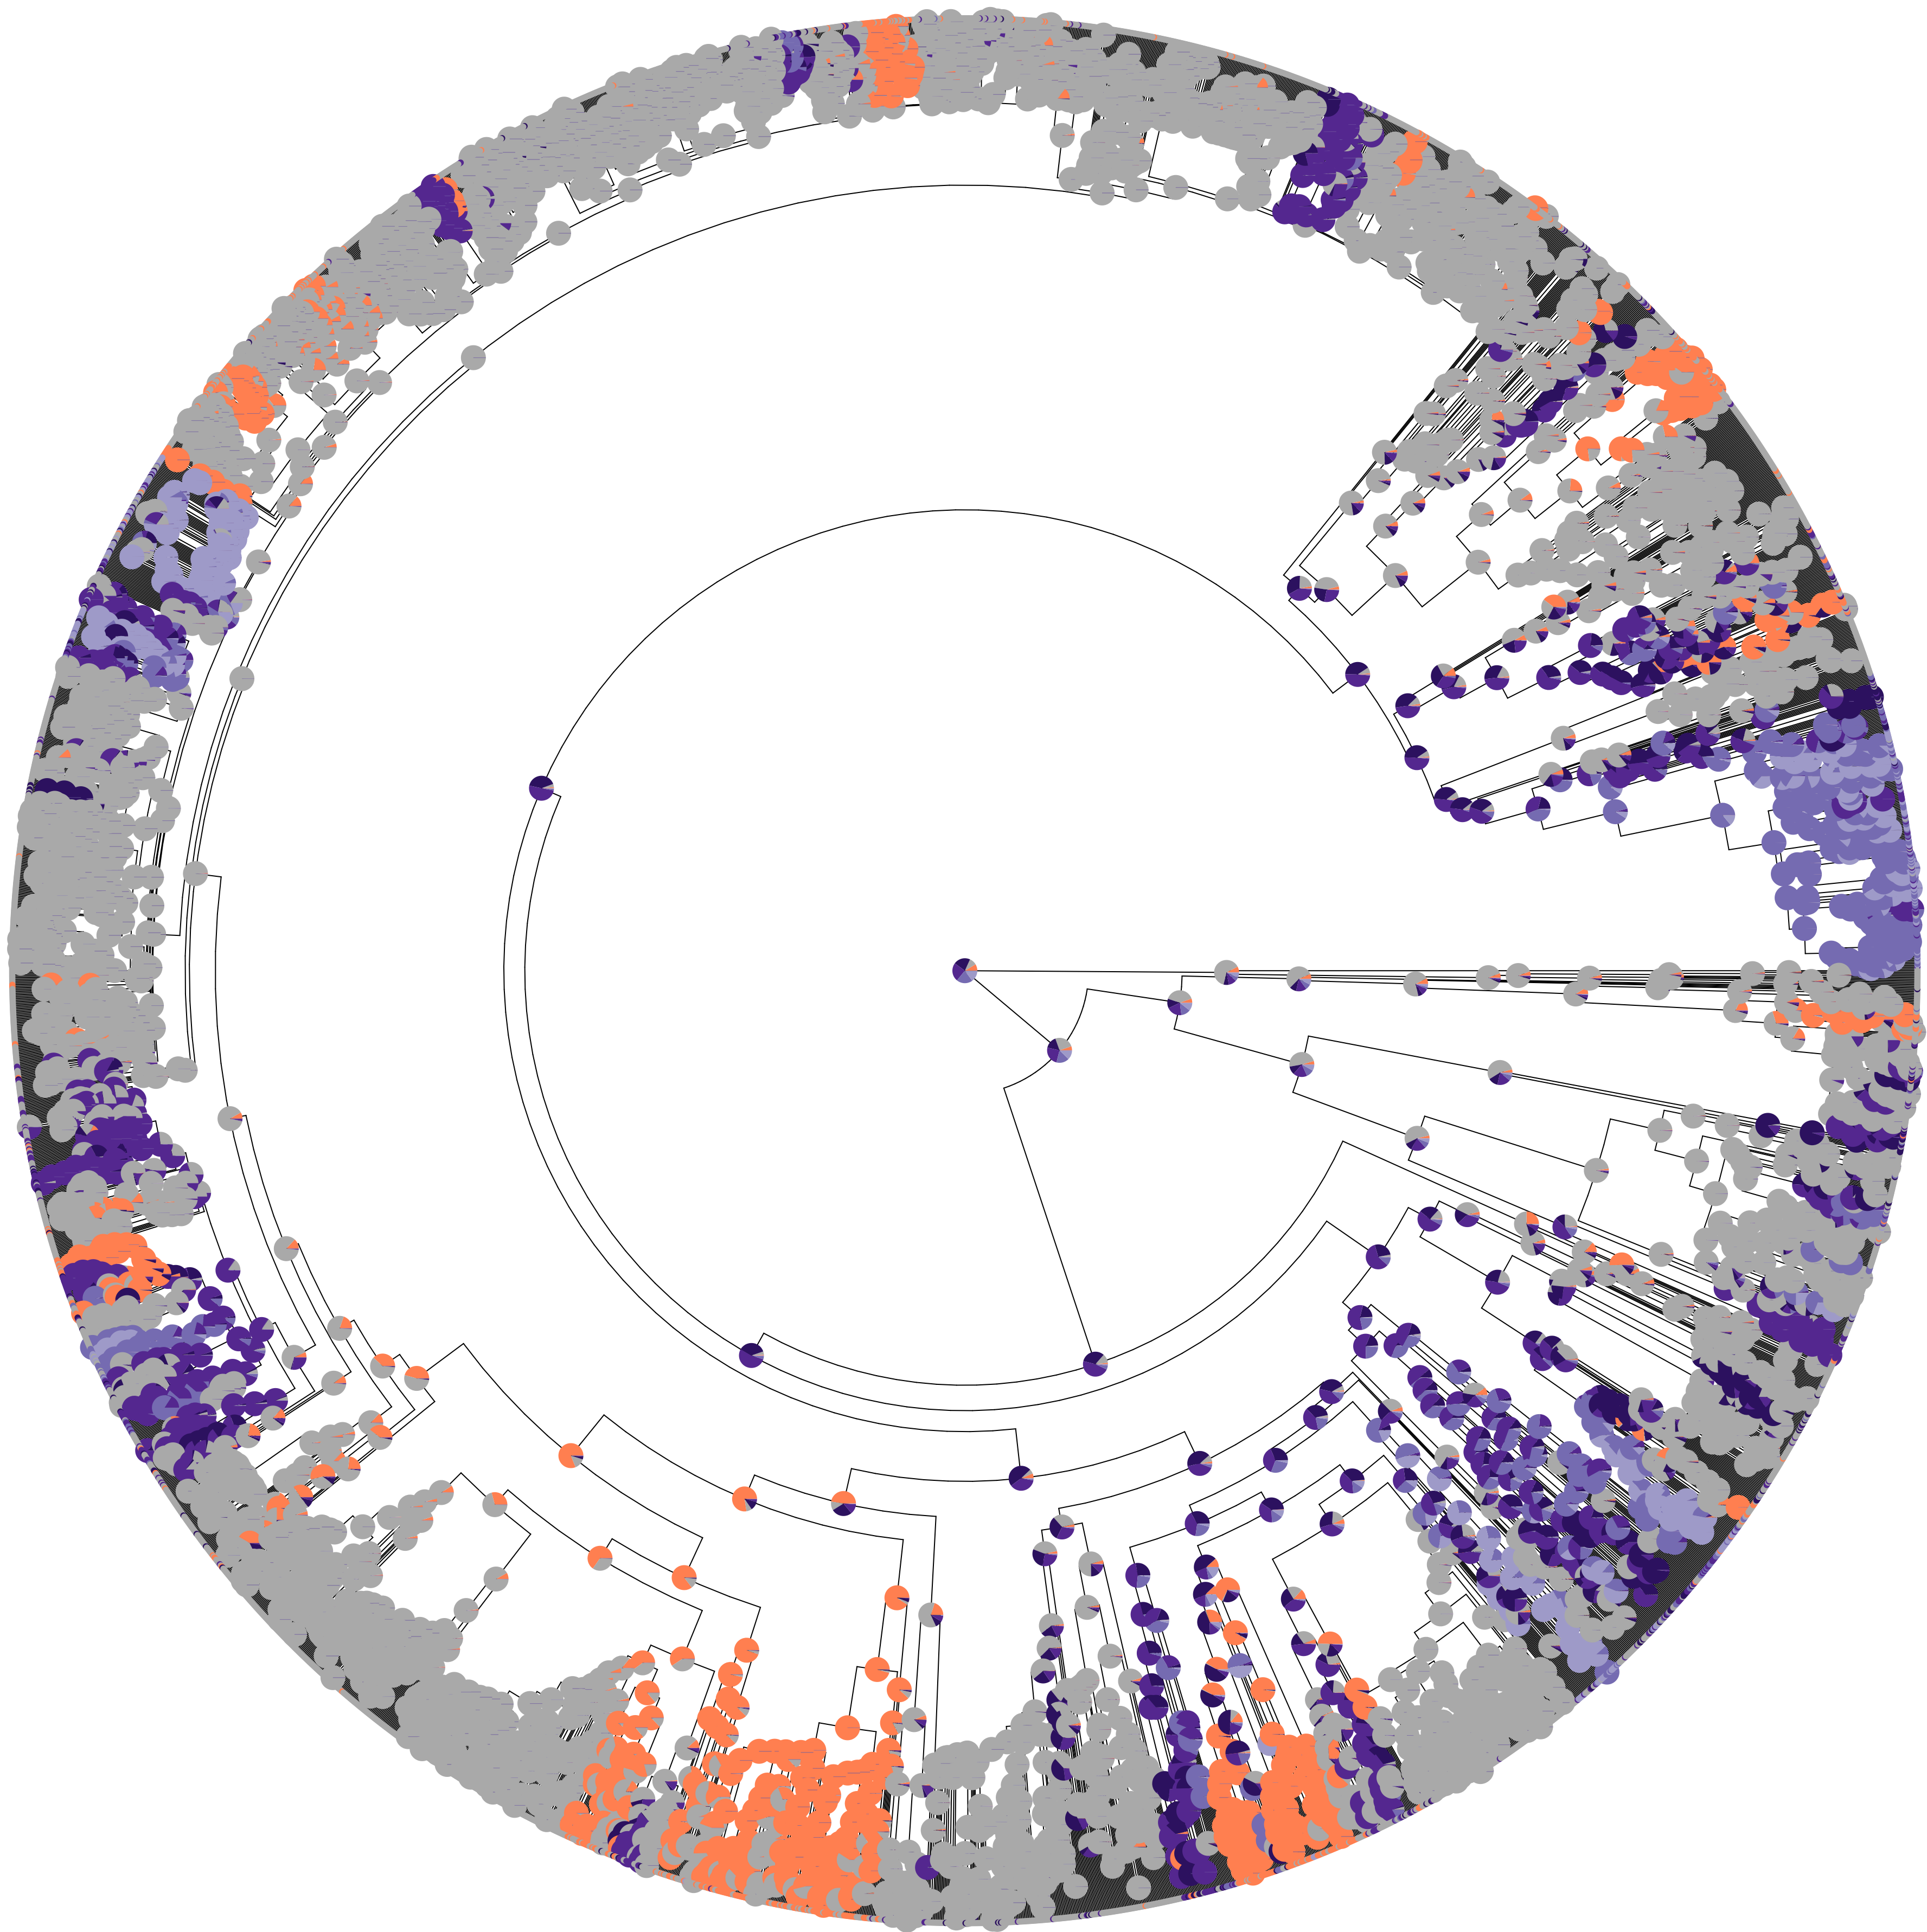

Supplement: Supplementary file 57 [file male_pert_tail.pdf › supp_3/male_pert_tail.pdf]

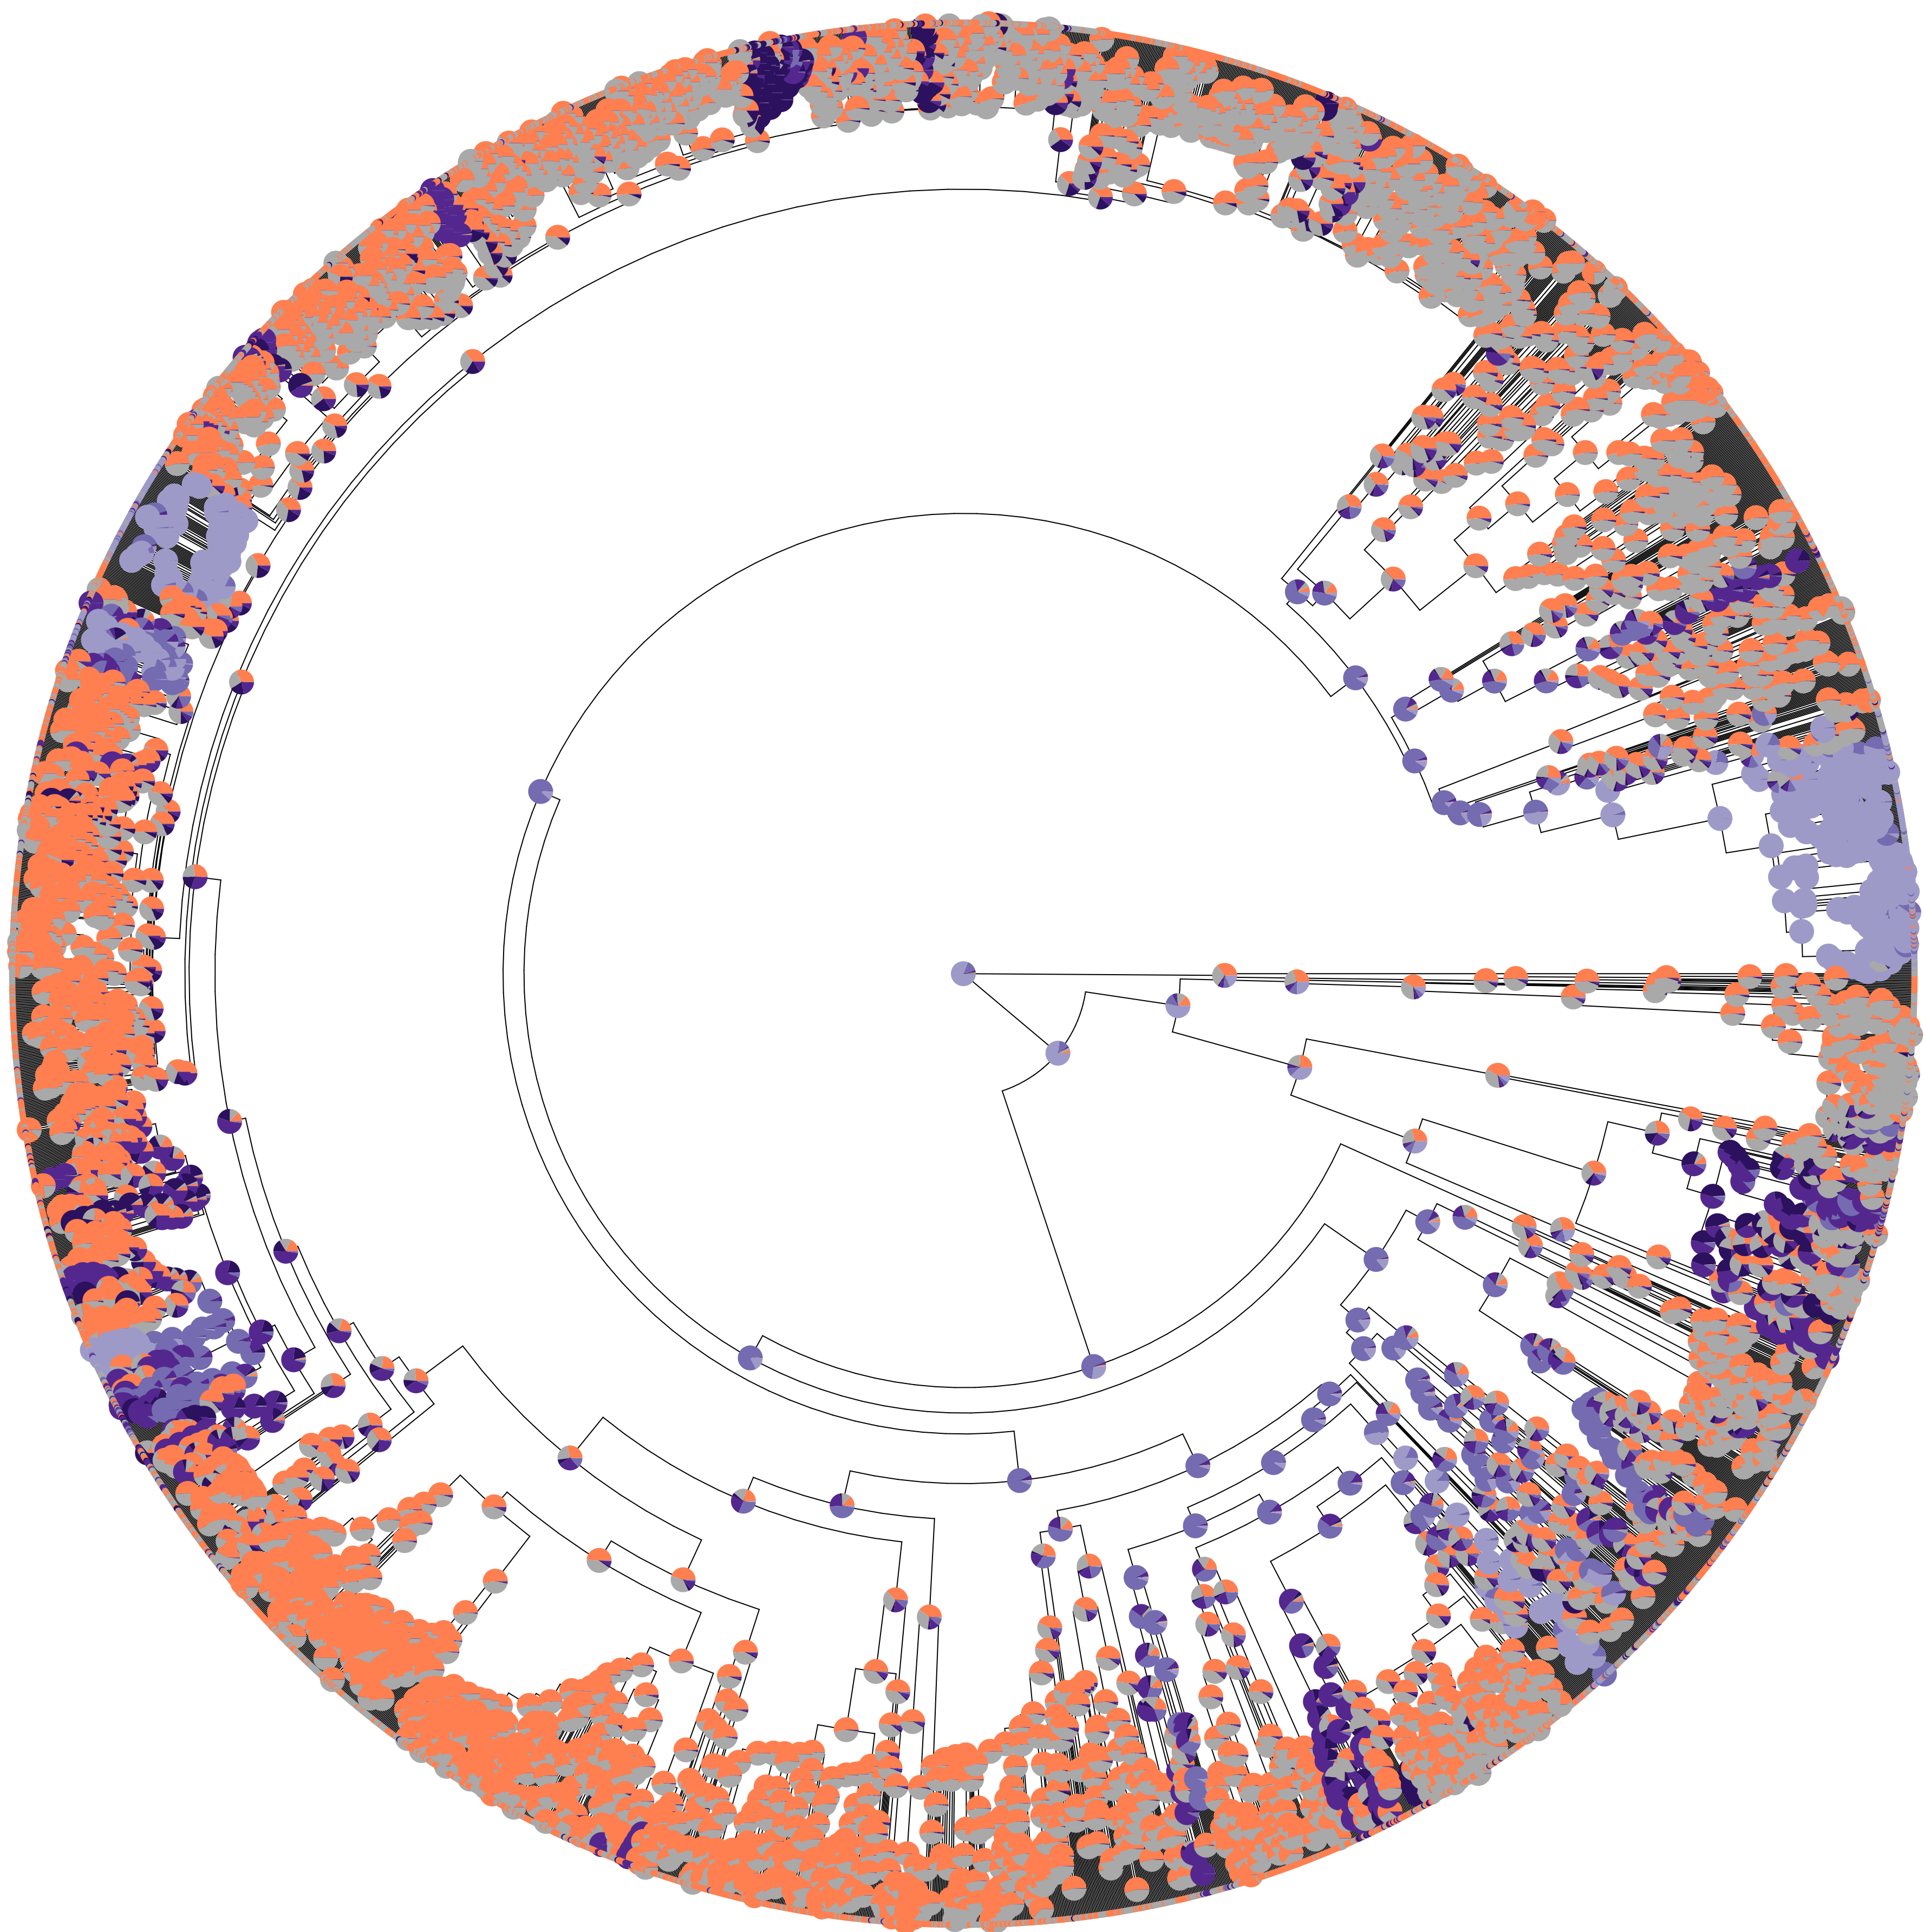

Supplement: Supplementary file 58 [file male_pert_throat.pdf › supp_3/male_pert_throat.pdf]

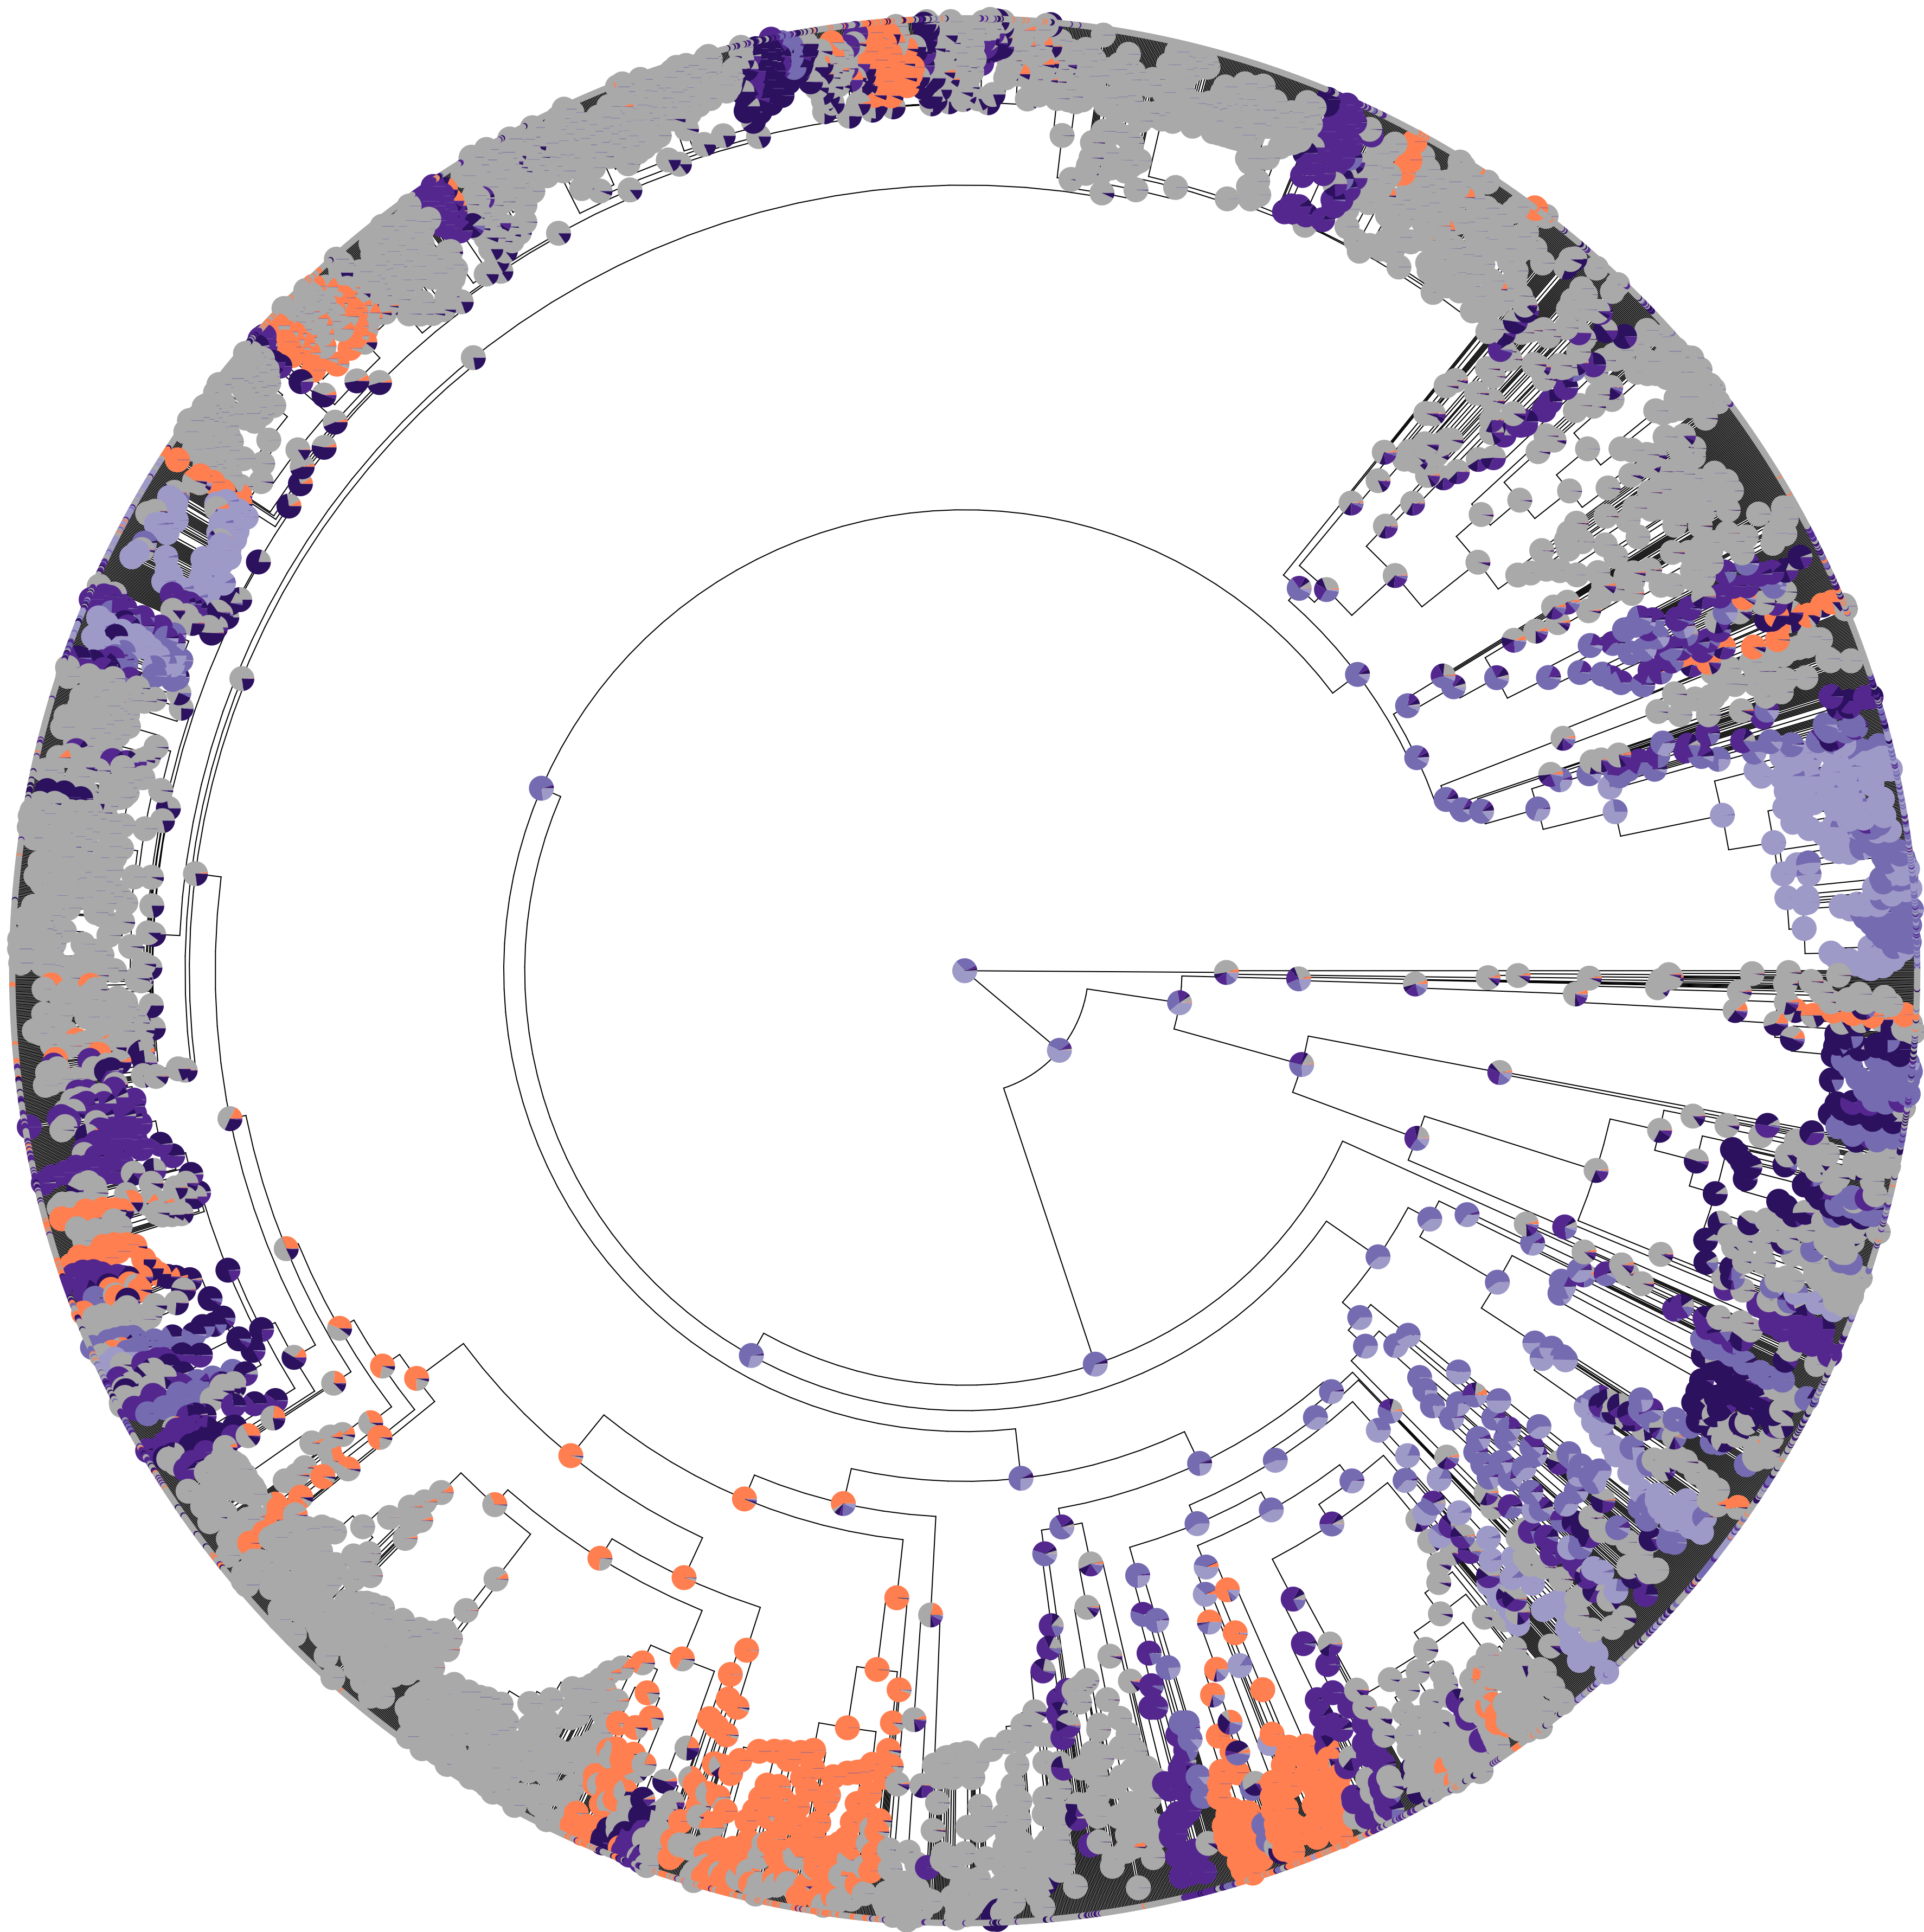

Supplement: Supplementary file 59 [file male_pert_wings.pdf › supp_3/male_pert_wings.pdf]

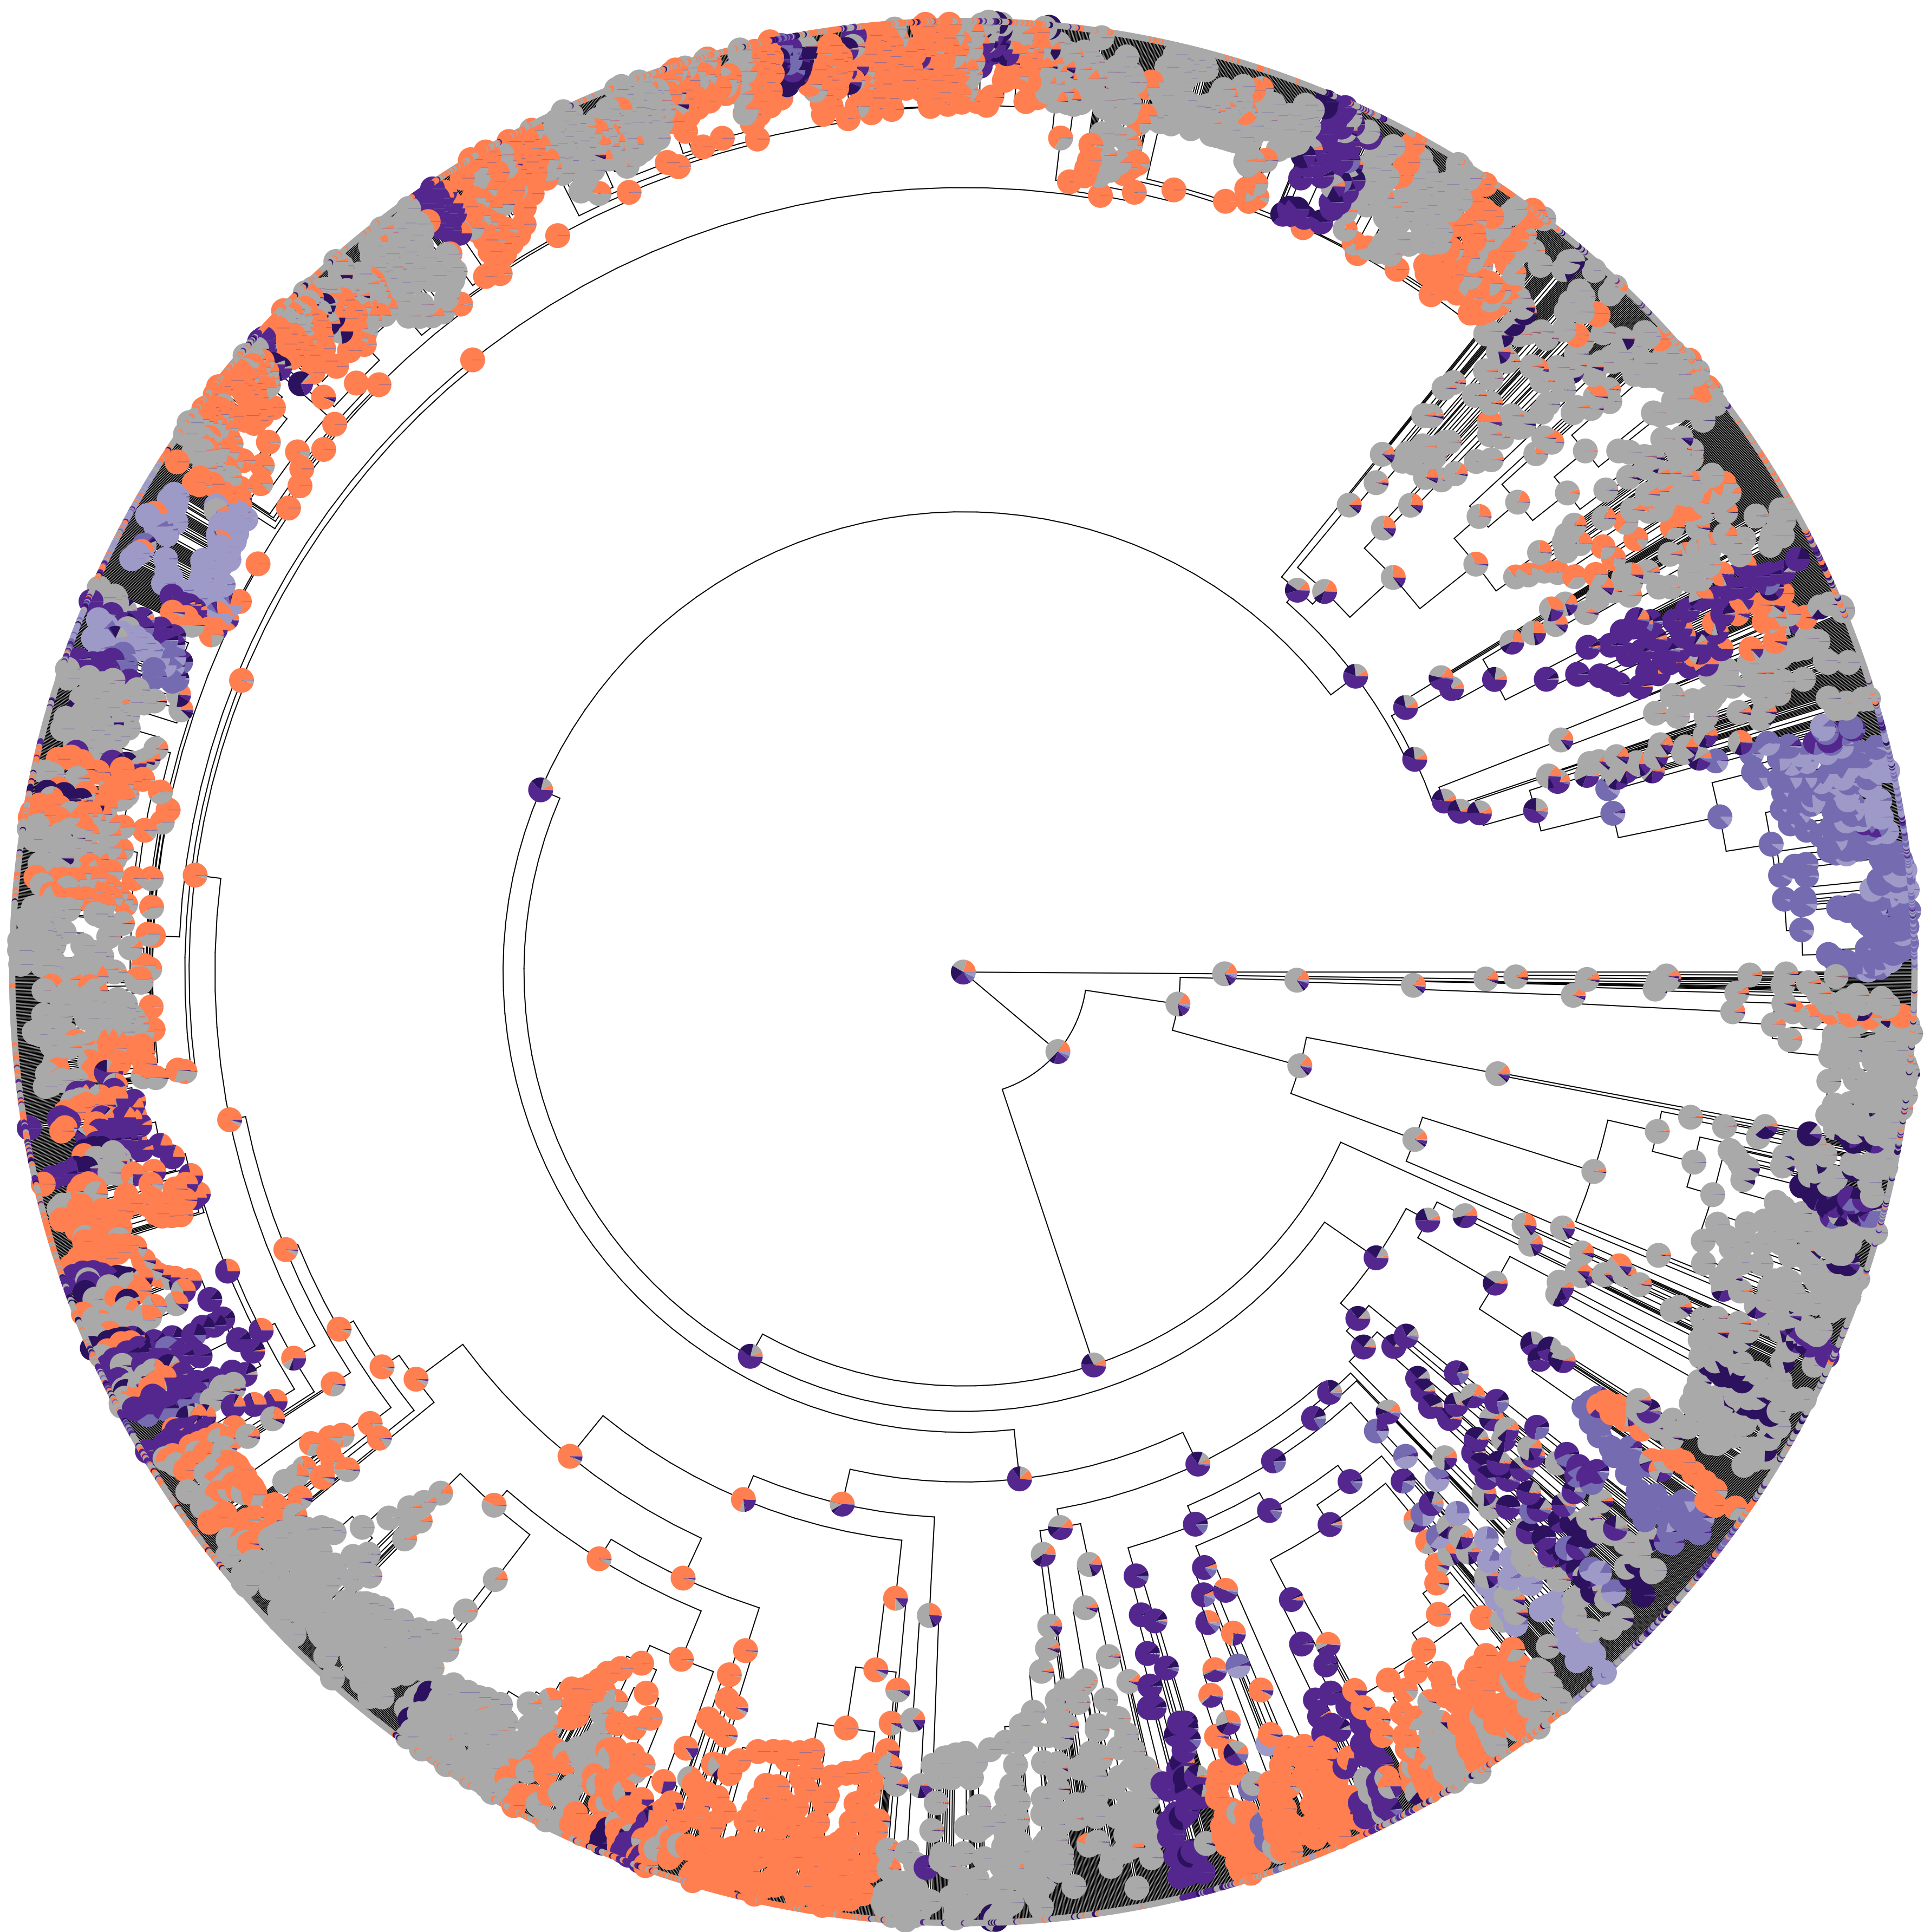

Supplement: Supplementary file 60 [file male_rump.pdf › supp_3/male_rump.pdf]

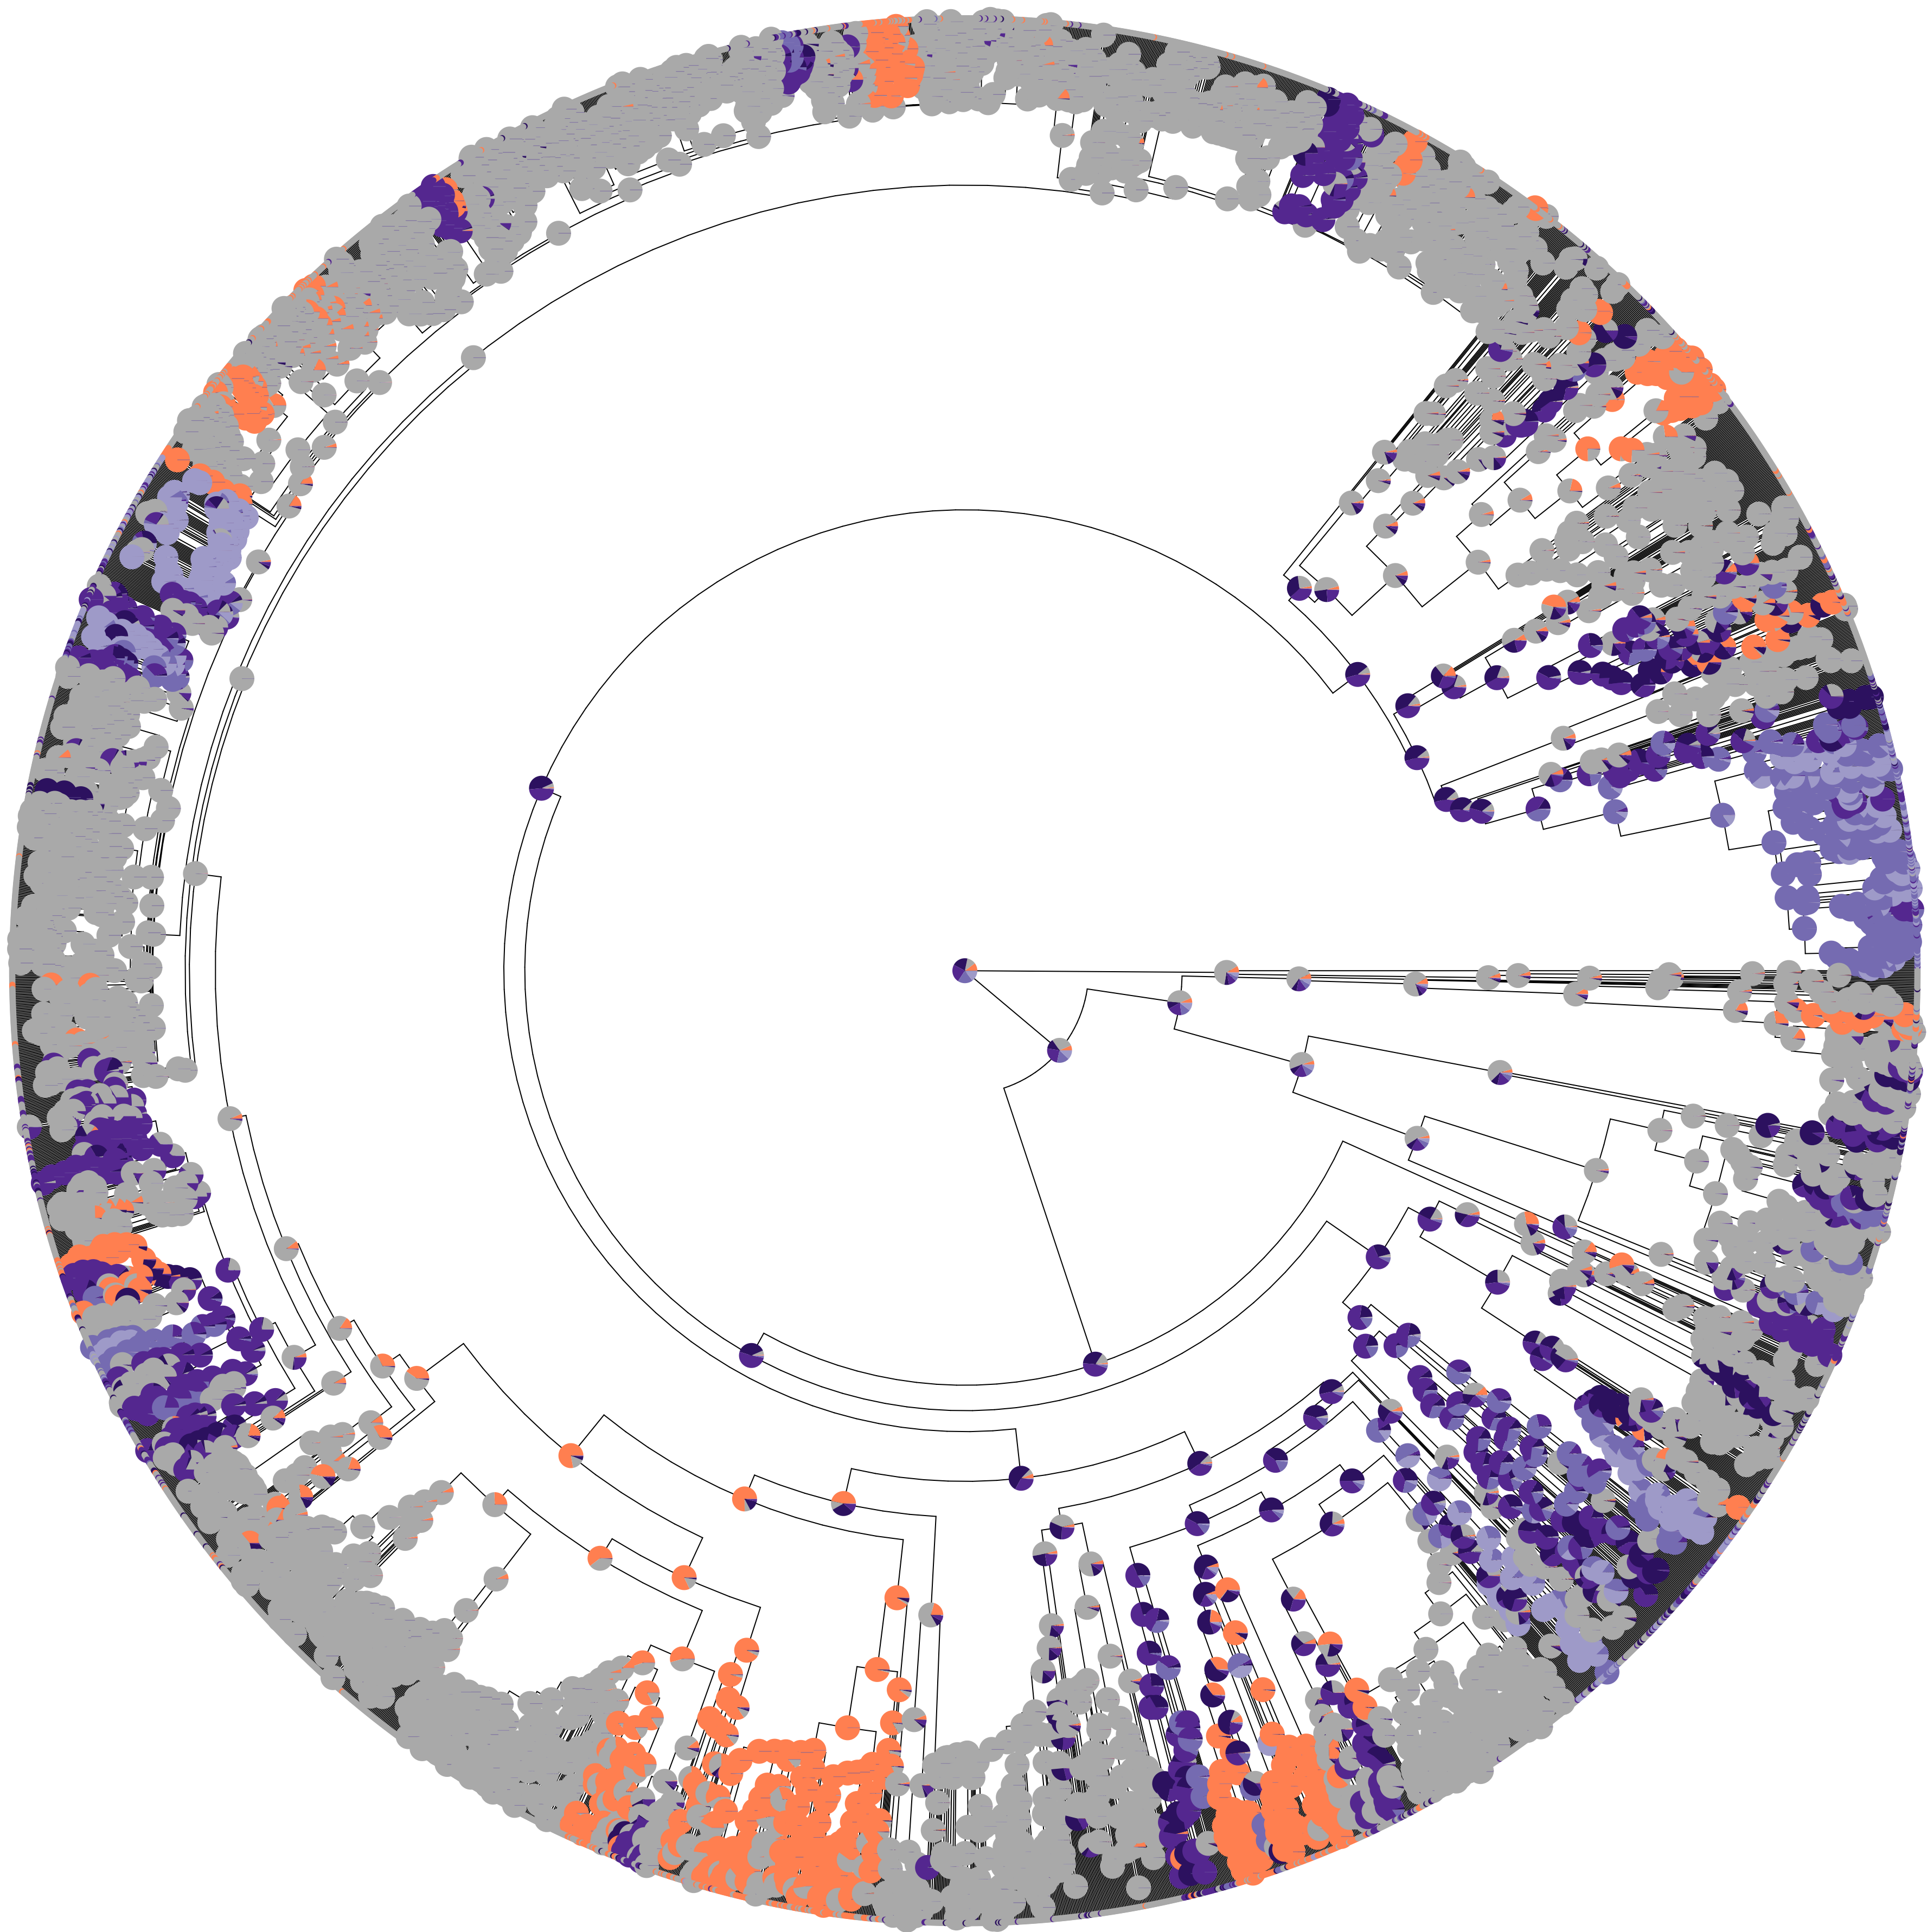

Supplement: Supplementary file 61 [file male_tail.pdf › supp_3/male_tail.pdf]

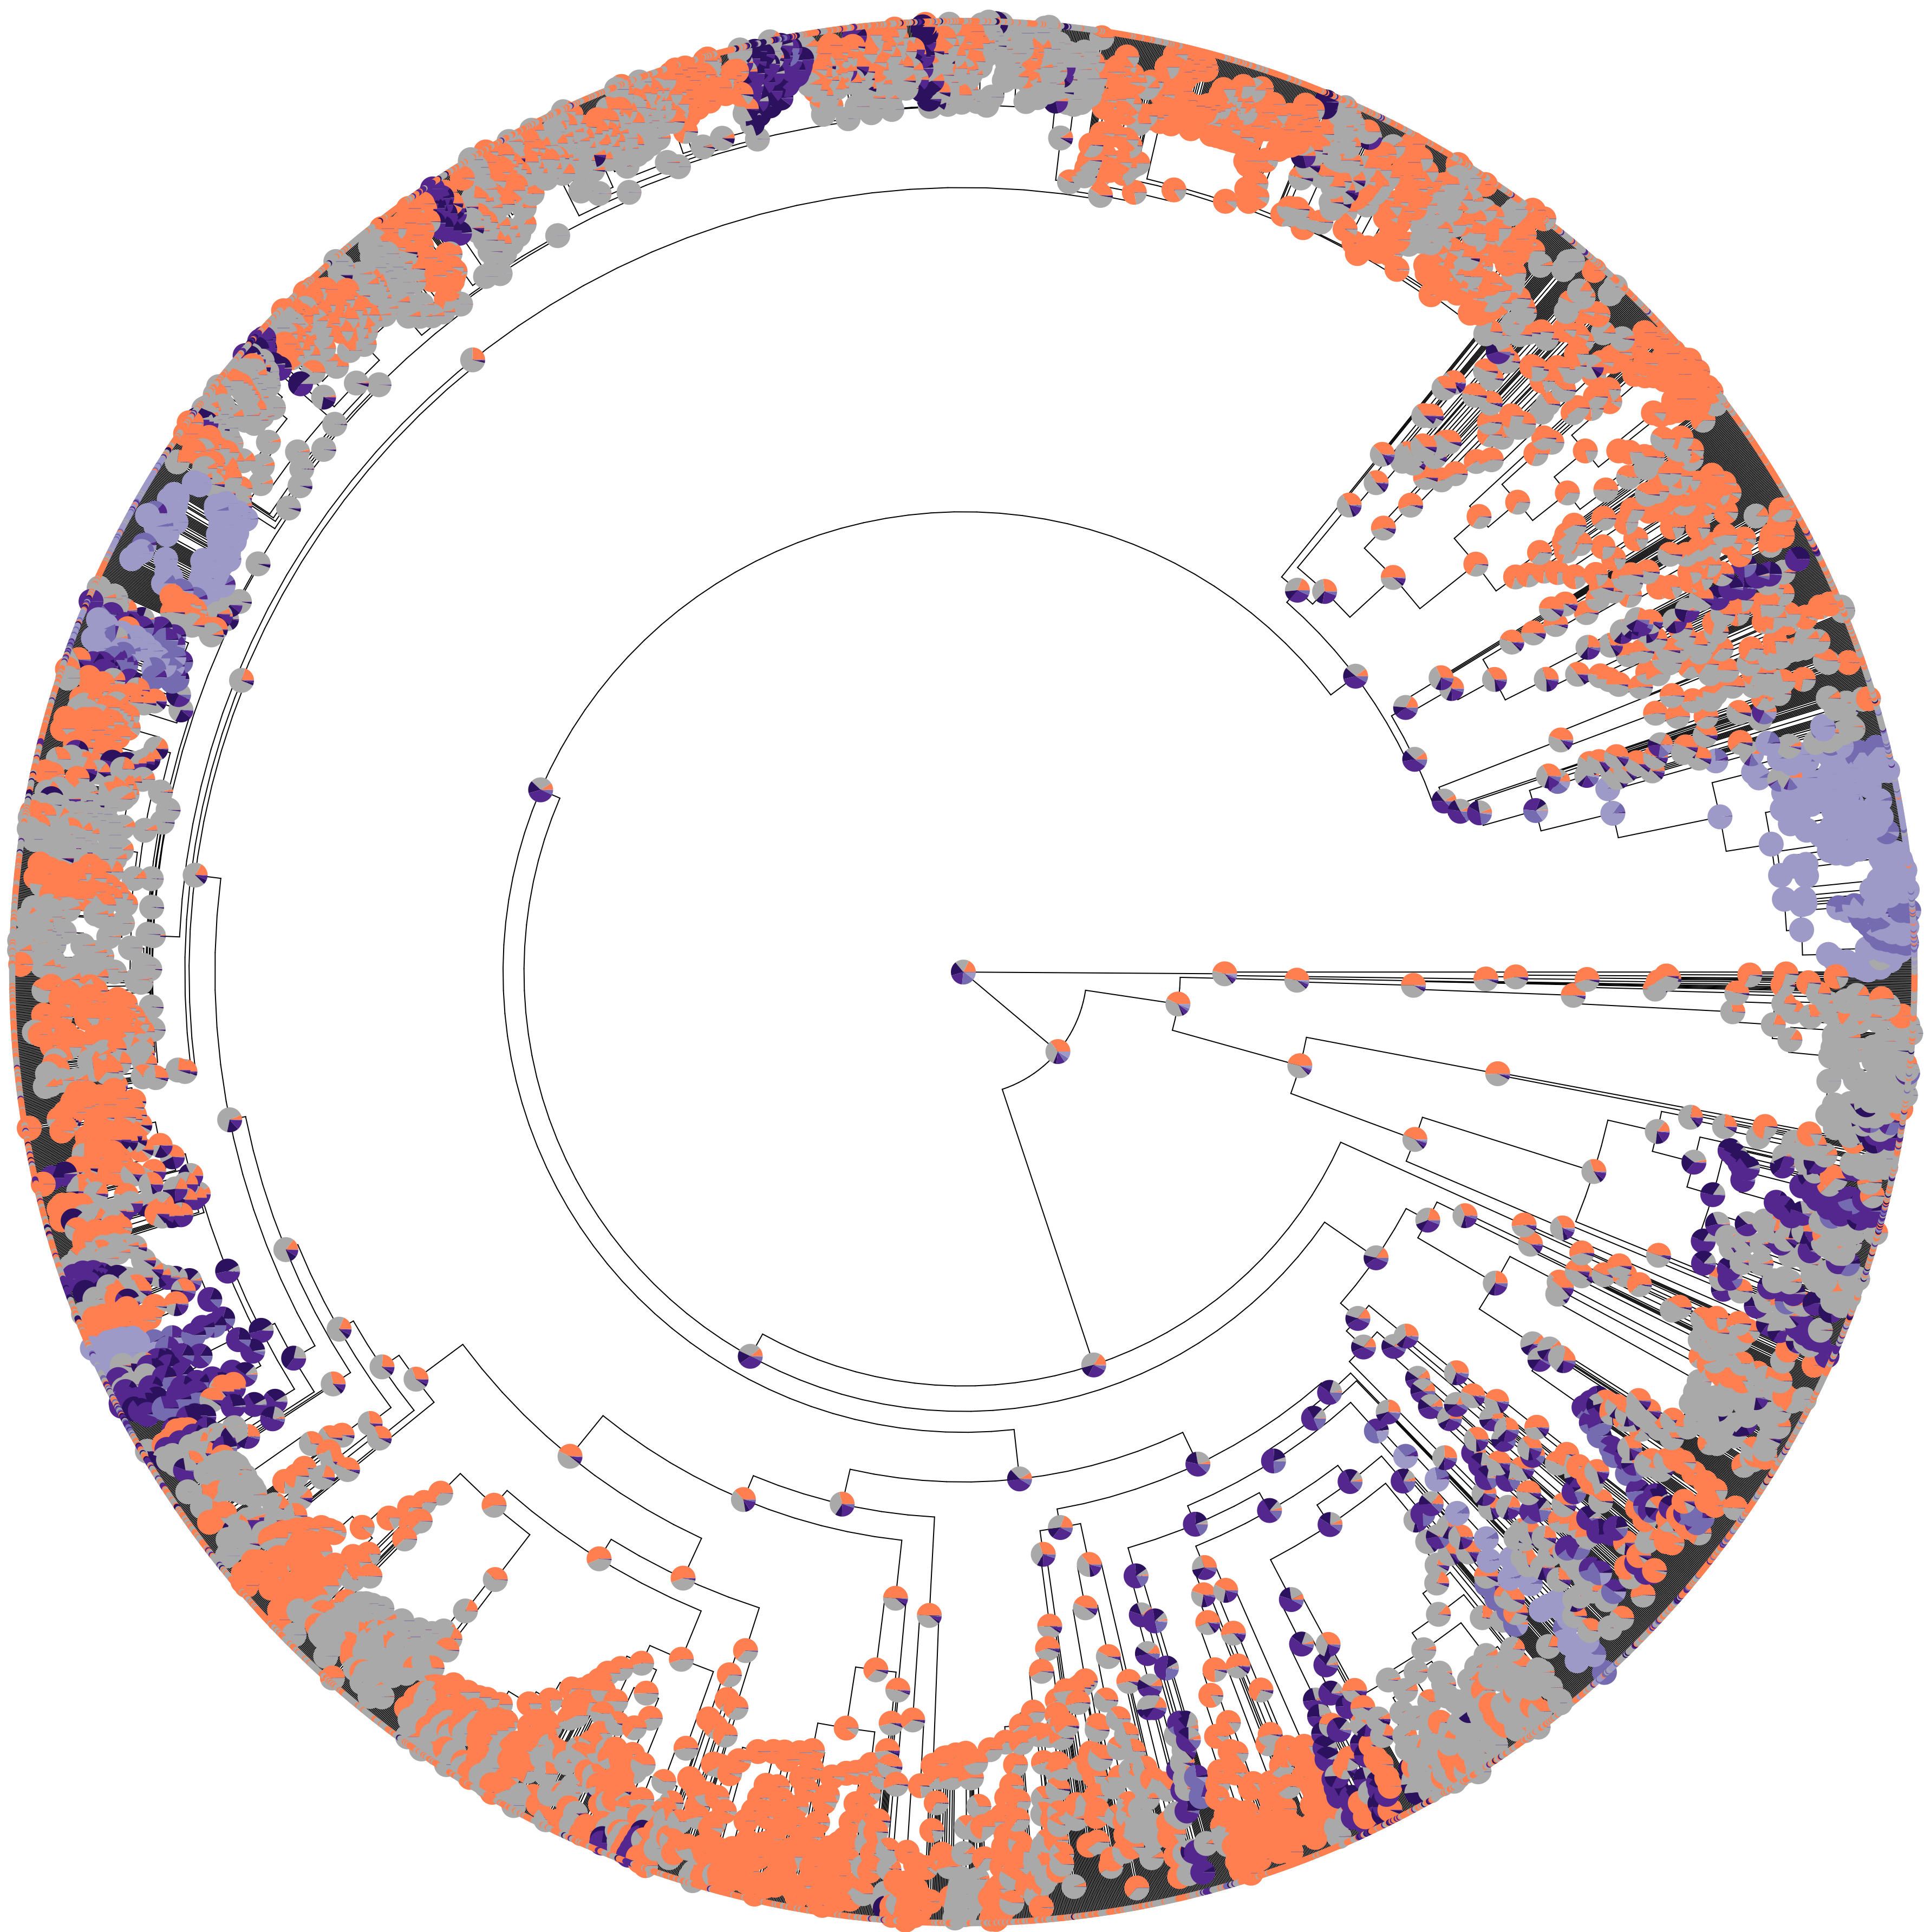

Supplement: Supplementary file 62 [file male_throat.pdf › supp_3/male_throat.pdf]



Supplement: Supplementary file 63 [file male_wings.pdf › supp_3/male_wings.pdf]
